# Supplementary material for: Mapping Microproteins and ncRNA-Encoded Polypeptides in Different Mouse Tissues
Source: Front Cell Dev Biol. 2021 Jul 26;9:687748. doi: 10.3389/fcell.2021.687748 (PMC8350139; doi:10.3389/fcell.2021.687748)
Supplement: Supplementary file 2 [file Table_1.XLSX]

## Sheet: Proteins
Total proteins identified using bottom-up approach
Accession	Tissue	Buffer	Gene type	Brain	Heart	Kidney	Liver	Spleen	Length	Coverage
A0A087WP46	kidney,	HCl	mRNA	0	0	2	0	0	1202	0.0249584
A0A087WQ44	spleen,	HCl	mRNA	0	0	0	0	2	3271	0.00978294
A0A0A0MQF6	liver,brain,kidney,heart,	HCl	mRNA	16	21	25	21	0	359	0.376045
A0A0B4J1E3	liver,	HCl	mRNA	0	0	0	2	0	993	0.0110775
A0A0G2JFH2	heart,	HCl	mRNA	0	50	0	0	0	1441	0.380291
A0A0G2JGW6	brain,	HCl	mRNA	7	0	0	0	0	960	0.075
A0A0N4SUI7	brain,	HCl	mRNA	2	0	0	0	0	68	0.397059
A0A0N4SVB5	brain,	HCl	mRNA	8	0	0	0	0	972	0.136831
A0A0R3P9D0	brain,	HCl	mRNA	3	0	0	0	0	716	0.0530726
A0A0R4J003	brain,	HCl	mRNA	5	0	0	0	0	171	0.391813
A0A0R4J030	brain,	HCl	mRNA	13	0	0	0	0	635	0.231496
A0A0R4J034	liver,	HCl	mRNA	0	0	0	4	0	789	0.0646388
A0A0R4J041	spleen,	HCl	mRNA	0	0	0	0	3	580	0.0344828
A0A0R4J050	kidney,	HCl	mRNA	0	0	2	0	0	408	0.0490196
A0A0R4J093	liver,kidney,heart,	HCl	mRNA	0	2	5	5	0	227	0.0881057
A0A0R4J099	brain,	HCl	mRNA	3	0	0	0	0	256	0.15625
A0A0R4J0I0	liver,kidney,	HCl	mRNA	0	0	2	2	0	551	0.0344828
A0A0R4J0R1	spleen,	HCl	mRNA	0	0	0	0	4	101	0.306931
A0A0R4J122	kidney,	HCl	mRNA	0	0	3	0	0	540	0.0388889
A0A0R4J1H2	liver,	HCl	mRNA	0	0	0	2	0	523	0.0707457
A0A0R4J1I9	kidney,	HCl	mRNA	0	0	4	0	0	553	0.0289331
A0A0R4J1J1	kidney,	HCl	mRNA	0	0	2	0	0	142	0.183099
A0A0R4J1V0	liver,	HCl	mRNA	0	0	0	12	0	519	0.206166
A0A140T8L1	spleen,heart,	HCl	mRNA	0	5	0	0	5	270	0.166667
A0A1B0GR85	liver,brain,kidney,	HCl	mRNA	2	0	6	6	0	1767	0.0158461
A0A1B0GSX6	spleen,	HCl	mRNA	0	0	0	0	2	364	0.0906593
A0A1B0GT88	brain,	HCl	mRNA	3	0	0	0	0	824	0.0667476
A0A1Y7VJR5	brain,	HCl	mRNA	3	0	0	0	0	782	0.0485934
A0A1Y7VK55	liver,	HCl	mRNA	0	0	0	2	0	461	0.0347072
A2A699	brain,	HCl	mRNA	6	0	0	0	0	822	0.110706
Q61268	liver,	HCl	mRNA	0	0	0	16	0	124	0.0869412
A2A6J7	spleen,	HCl	mRNA	0	0	0	0	52	324	0.864198
A2A7B5	kidney,	HCl	mRNA	0	0	2	0	0	1709	0.0152136
A2A7S8-2	liver,kidney,	HCl	mRNA	0	0	2	7	0	1070	0.0373832
A2AE89	liver,kidney,heart,	HCl	mRNA	0	11	2	5	0	244	0.372951
A2AEG6	brain,	HCl	mRNA	2	0	0	0	0	328	0.097561
A2AEM2	liver,kidney,	HCl	mRNA	0	0	5	5	0	544	0.145221
A2AF33	brain,	HCl	mRNA	2	0	0	0	0	45	0.622222
A2AFQ2	liver,kidney,heart,	HCl	mRNA	0	9	7	4	0	271	0.431734
A2AHG0	brain,	HCl	mRNA	6	0	0	0	0	700	0.142857
A2ALS5-2	brain,	HCl	mRNA	5	0	0	0	0	727	0.0935351
A2APB8	spleen,	HCl	mRNA	0	0	0	0	6	745	0.102013
A2APT9	liver,kidney,	HCl	mRNA	0	0	7	6	0	773	0.156533
A2AQE2	liver,	HCl	mRNA	0	0	0	3	0	1089	0.0413223
A2ARQ4	liver,	HCl	mRNA	0	0	0	2	0	133	0.0827068
A2ATK9	brain,	HCl	mRNA	3	0	0	0	0	892	0.0392377
A2AW15	brain,	HCl	mRNA	2	0	0	0	0	1312	0.0282012
A2BGN7	kidney,	HCl	mRNA	0	0	2	0	0	85	0.141176
A2CEK3	brain,	HCl	mRNA	2	0	0	0	0	580	0.0827586
A2RSJ4	liver,brain,kidney,	HCl	mRNA	6	0	5	2	0	1457	0.0370625
A2TJV2	kidney,	HCl	mRNA	0	0	4	0	0	734	0.0653951
A6H8H5	brain,	HCl	mRNA	2	0	0	0	0	907	0.0441014
A6MDD2	brain,	HCl	mRNA	5	0	0	0	0	981	0.0815494
A8IK50	brain,	HCl	mRNA	10	0	0	0	0	136	0.794118
B1AZI6	kidney,	HCl	mRNA	0	0	4	0	0	1594	0.0207026
B1AZP2-2	brain,	HCl	mRNA	6	0	0	0	0	989	0.0920121
B2KF50	liver,	HCl	mRNA	0	0	0	4	0	1429	0.0251924
B2RRE7	liver,spleen,kidney,	HCl	mRNA	0	0	4	5	8	1107	0.0496838
B7ZCI2	heart,	HCl	mRNA	0	78	0	0	0	1014	0.554241
B7ZMP8	heart,	HCl	mRNA	0	15	0	0	0	279	0.616487
B7ZNL3	heart,	HCl	mRNA	0	185	0	0	0	284	0.785211
B9EJA2-2	brain,	HCl	mRNA	4	0	0	0	0	630	0.122222
D3YTU0	brain,	HCl	mRNA	6	0	0	0	0	171	0.233918
D3YWS8	spleen,	HCl	mRNA	0	0	0	0	2	801	0.0162297
D3YYR9	brain,	HCl	mRNA	5	0	0	0	0	189	0.365079
D3YYY8	brain,	HCl	mRNA	3	0	0	0	0	869	0.0402762
D3YZ68	liver,kidney,	HCl	mRNA	0	0	16	119	0	249	0.361446
D3Z1V4	spleen,	HCl	mRNA	0	0	0	0	3	209	0.277512
D3Z357	liver,spleen,	HCl	mRNA	0	0	0	2	3	1446	0.0228216
D3Z5N6	spleen,	HCl	mRNA	0	0	0	0	3	405	0.0395062
D3Z621	brain,	HCl	mRNA	2	0	0	0	0	131	0.0687023
D3Z742	kidney,	HCl	mRNA	0	0	2	0	0	491	0.0346232
D3Z7D3	brain,	HCl	mRNA	3	0	0	0	0	1572	0.0407125
D3Z7Q2	heart,	HCl	mRNA	0	3	0	0	0	69	0.318841
D3Z7W0	spleen,	HCl	mRNA	0	0	0	0	5	209	0.210526
E9PU87	liver,brain,	HCl	mRNA	9	0	0	3	0	1369	0.0693937
E9PUK3	kidney,	HCl	mRNA	0	0	2	0	0	551	0.0598911
E9PWM3	brain,	HCl	mRNA	6	0	0	0	0	2356	0.0394737
E9PXW9	liver,heart,	HCl	mRNA	0	2	0	4	0	442	0.0452489
E9PY03	liver,	HCl	mRNA	0	0	0	2	0	133	0.203008
E9PYL2	brain,	HCl	mRNA	4	0	0	0	0	2035	0.0289926
E9PYT0	kidney,	HCl	mRNA	0	0	2	0	0	1503	0.0106454
E9PZC3	liver,spleen,heart,	HCl	mRNA	0	7	0	2	4	247	0.267206
E9Q166	liver,kidney,	HCl	mRNA	0	0	2	2	0	1460	0.0328767
E9Q1U6	liver,	HCl	mRNA	0	0	0	3	0	623	0.0401284
E9Q271	brain,	HCl	mRNA	2	0	0	0	0	1322	0.00680787
E9Q392	spleen,	HCl	mRNA	0	0	0	0	2	556	0.0251799
E9Q3C1	liver,	HCl	mRNA	0	0	0	4	0	696	0.0761494
E9Q455	liver,spleen,	HCl	mRNA	0	0	0	5	4	251	0.179283
E9Q555	liver,	HCl	mRNA	0	0	0	6	0	5152	0.015528
E9Q7E2	spleen,	HCl	mRNA	0	0	0	0	2	1828	0.0158643
E9Q7Q3	heart,	HCl	mRNA	0	99	0	0	0	248	0.733871
E9Q827	liver,brain,spleen,kidney,heart,	HCl	mRNA	22	7	6	6	2	145	0.524138
E9Q828	brain,	HCl	mRNA	2	0	0	0	0	1172	0.0273038
E9Q8A3	liver,kidney,	HCl	mRNA	0	0	2	3	0	828	0.0338164
E9Q8D0	liver,	HCl	mRNA	0	0	0	2	0	531	0.0508475
E9Q8L9	liver,spleen,	HCl	mRNA	0	0	0	2	5	1166	0.00857633
E9Q9F1	brain,	HCl	mRNA	3	0	0	0	0	952	0.0367647
E9Q9U8	brain,	HCl	mRNA	2	0	0	0	0	364	0.0494505
E9QAJ9	spleen,	HCl	mRNA	0	0	0	0	6	818	0.136919
E9QAP7	liver,spleen,kidney,	HCl	mRNA	0	0	3	3	4	1042	0.0316699
E9QAS8	liver,	HCl	mRNA	0	0	0	3	0	631	0.0364501
E9QKD1	liver,	HCl	mRNA	0	0	0	4	0	1165	0.0351931
E9QKI4	brain,spleen,	HCl	mRNA	4	0	0	0	2	328	0.106707
E9QKK4	brain,	HCl	mRNA	2	0	0	0	0	538	0.0464684
E9QLH9	brain,	HCl	mRNA	3	0	0	0	0	1373	0.0356883
E9QLK9	brain,	HCl	mRNA	42	0	0	0	0	901	0.164262
E9QMN1	kidney,	HCl	mRNA	0	0	3	0	0	910	0.0406593
E9QMX4	brain,	HCl	mRNA	2	0	0	0	0	1056	0.0217803
E9QNF5	kidney,	HCl	mRNA	0	0	4	0	0	593	0.0472175
E9QNP0	spleen,heart,	HCl	mRNA	0	6	0	0	15	232	0.150862
E9QP54	brain,	HCl	mRNA	2	0	0	0	0	1047	0.0248329
ENSMUSP00000078625.6	brain,spleen,	HCl	mRNA	4	0	0	0	2	241	0.120332
ENSMUSP00000114522.1	liver,heart,	HCl	mRNA	0	14	0	6	0	1739	0.39563
ENSMUSP00000131802.1	spleen,	HCl	mRNA	0	0	0	0	4	296	0.118243
ENSMUSP00000135902.1	spleen,	HCl	mRNA	0	0	0	0	3	612	0.0816993
ENSMUSP00000137341.1	liver,heart,	HCl	mRNA	0	2	0	2	0	166	0.0662651
F6W687	liver,brain,spleen,kidney,heart,	HCl	mRNA	2	2	3	2	11	112	0.133929
F6X9I3	spleen,	HCl	mRNA	0	0	0	0	2	161	0.118012
F6ZSG0	brain,	HCl	mRNA	9	0	0	0	0	356	0.241573
F7A0B0	brain,	HCl	mRNA	45	0	0	0	0	196	0.55102
F7CZ64	brain,	HCl	mRNA	5	0	0	0	0	423	0.070922
F7D7A9	brain,	HCl	mRNA	4	0	0	0	0	110	0.445455
F8VPL2	kidney,	HCl	mRNA	0	0	3	0	0	1686	0.0278766
F8VPU2	kidney,	HCl	mRNA	0	0	3	0	0	1048	0.0591603
F8WGR0	brain,	HCl	mRNA	22	0	0	0	0	663	0.280543
F8WHT3	brain,	HCl	mRNA	15	0	0	0	0	2230	0.108072
F8WI30	kidney,	HCl	mRNA	0	0	2	0	0	445	0.0337079
G3UW41	kidney,	HCl	mRNA	0	0	3	0	0	181	0.176796
G3UW55	brain,	HCl	mRNA	7	0	0	0	0	114	0.684211
G3UWW1	brain,	HCl	mRNA	33	0	0	0	0	336	0.520833
G3UWX1	spleen,	HCl	mRNA	0	0	0	0	5	1145	0.0401747
G3UXA6	liver,kidney,	HCl	mRNA	0	0	3	5	0	554	0.0415162
G3UZT2	liver,	HCl	mRNA	0	0	0	11	0	134	0.723881
G3X8S1	liver,kidney,heart,	HCl	mRNA	0	3	3	2	0	157	0.146497
G3X932	brain,	HCl	mRNA	3	0	0	0	0	1109	0.00901713
G3X9Q2	brain,	HCl	mRNA	3	0	0	0	0	69	0.434783
G3X9V4	brain,	HCl	mRNA	3	0	0	0	0	1482	0.0215924
G5E8E3	spleen,	HCl	mRNA	0	0	0	0	2	413	0.0363196
G5E8J0	liver,kidney,	HCl	mRNA	0	0	2	2	0	2473	0.0109179
G5E8R4	spleen,	HCl	mRNA	0	0	0	0	2	873	0.0137457
G5E8T6	liver,	HCl	mRNA	0	0	0	4	0	1476	0.0284553
G5E8W8	kidney,	HCl	mRNA	0	0	5	0	0	486	0.0946502
H3BIZ9	kidney,	HCl	mRNA	0	0	2	0	0	292	0.0787671
H3BJQ7	spleen,	HCl	mRNA	0	0	0	0	2	213	0.192488
H3BKF8	kidney,	HCl	mRNA	0	0	2	0	0	445	0.0269663
I7HPW4	kidney,	HCl	mRNA	0	0	2	0	0	441	0.0589569
I7HPW8	kidney,	HCl	mRNA	0	0	3	0	0	3033	0.0049456
II_2458121	brain,	HCl	mRNA	3	0	0	0	0	99	0.434343
IP_1019354	liver,	HCl	ncRNA	0	0	0	3	0	121	0.198347
IP_1023661	liver,	HCl	ncRNA	0	0	0	5	0	432	0.108796
IP_1042067	brain,	HCl	ncRNA	13	0	0	0	0	291	0.33677
IP_1068850	brain,	HCl	mRNA	2	0	0	0	0	156	0.185897
IP_1076371	brain,	HCl	mRNA	3	0	0	0	0	79	0.620253
IP_1100811	brain,	HCl	mRNA	3	0	0	0	0	215	0.134884
IP_1109462	heart,	HCl	ncRNA	0	4	0	0	0	111	0.378378
IP_827673	kidney,	HCl	ncRNA	0	0	2	0	0	88	0.340909
IP_873747	spleen,kidney,heart,	HCl	ncRNA	0	13	9	0	15	215	0.376744
IP_903561	spleen,	HCl	ncRNA	0	0	0	0	2	50	0.3
J3KMH5	kidney,	HCl	mRNA	0	0	3	0	0	781	0.0448143
J3QNT7	kidney,	HCl	mRNA	0	0	3	0	0	640	0.0421875
NP_001078942.2	liver,kidney,	HCl	mRNA	0	0	11	16	0	1326	0.071644
NP_001160018.1	kidney,	HCl	mRNA	0	0	2	0	0	118	0.211864
NP_001191130.1	kidney,	HCl	mRNA	0	0	2	0	0	311	0.102894
NP_001229307.1	brain,	HCl	mRNA	2	0	0	0	0	1136	0.0325704
NP_001245387.1	liver,spleen,kidney,heart,	HCl	mRNA	0	5	2	3	4	145	0.213793
D3Z0I3	heart,	HCl	mRNA	0	110	0	0	0	93	0.08896
NP_001278162.1	kidney,	HCl	mRNA	0	0	2	0	0	1613	0.016119
NP_001288746.1	kidney,	HCl	mRNA	0	0	2	0	0	887	0.0394589
NP_001291473.1	brain,kidney,	HCl	mRNA	11	0	29	0	0	1076	0.112454
NP_001295354.1	kidney,	HCl	mRNA	0	0	2	0	0	57	0.175439
NP_001300631.1	brain,	HCl	mRNA	4	0	0	0	0	703	0.0753912
NP_001302433.1	brain,	HCl	mRNA	2	0	0	0	0	179	0.0726257
NP_001303604.1	liver,brain,spleen,kidney,	HCl	mRNA	4	0	5	3	2	355	0.109859
NP_032659.2	spleen,	HCl	mRNA	0	0	0	0	40	1125	0.365333
NP_038535.2	liver,	HCl	mRNA	0	0	0	2	0	906	0.0309051
NP_796363.2	liver,	HCl	mRNA	0	0	0	12	0	1845	0.0552846
O08715-4	liver,brain,kidney,	HCl	mRNA	2	0	8	7	0	890	0.0606742
O09161	heart,	HCl	mRNA	0	9	0	0	0	415	0.286747
O35126	kidney,	HCl	mRNA	0	0	2	0	0	1175	0.0238298
O35127	brain,kidney,	HCl	mRNA	7	0	3	0	0	126	0.507937
O35427	kidney,	HCl	mRNA	0	0	2	0	0	148	0.135135
O35607	brain,	HCl	mRNA	5	0	0	0	0	1038	0.0693642
O35633	brain,	HCl	mRNA	4	0	0	0	0	525	0.0857143
O54901	brain,	HCl	mRNA	2	0	0	0	0	278	0.0827338
O54962	heart,	HCl	mRNA	0	2	0	0	0	89	0.404494
O70139	spleen,	HCl	mRNA	0	0	0	0	2	76	0.223684
O70318	spleen,kidney,	HCl	mRNA	0	0	17	0	18	988	0.178138
O70340	brain,	HCl	mRNA	3	0	0	0	0	429	0.0675991
O70492	liver,brain,spleen,kidney,heart,	HCl	mRNA	4	8	4	3	3	162	0.228395
O70585	kidney,	HCl	mRNA	0	0	2	0	0	659	0.047041
O88207	heart,	HCl	mRNA	0	2	0	0	0	1838	0.015778
O88703	brain,	HCl	mRNA	4	0	0	0	0	863	0.0544612
O88704	brain,	HCl	mRNA	4	0	0	0	0	910	0.0461538
O88852	brain,	HCl	mRNA	3	0	0	0	0	379	0.118734
O89084	brain,	HCl	mRNA	3	0	0	0	0	844	0.0663507
O89090	spleen,	HCl	mRNA	0	0	0	0	2	784	0.0357143
P00015	liver,spleen,kidney,heart,	HCl	mRNA	0	11	7	4	3	105	0.533333
P02798	brain,spleen,	HCl	mRNA	6	0	0	0	2	61	0.655738
P04441	spleen,	HCl	mRNA	0	0	0	0	6	279	0.218638
P05213	liver,spleen,	HCl	mRNA	0	0	0	19	12	451	0.208426
P09240	brain,	HCl	mRNA	4	0	0	0	0	115	0.2
P09541	brain,	HCl	mRNA	4	0	0	0	0	193	0.253886
P0CG14	brain,	HCl	mRNA	5	0	0	0	0	533	0.155722
P0CL69	brain,	HCl	mRNA	2	0	0	0	0	594	0.0555556
P0DJF2	spleen,kidney,	HCl	mRNA	0	0	2	0	2	80	0.375
P0DN34	liver,brain,kidney,heart,	HCl	ncRNA	3	6	2	3	0	57	0.298246
P10637-5	kidney,	HCl	mRNA	0	0	18	0	0	372	0.462366
P12961	brain,	HCl	mRNA	7	0	0	0	0	212	0.287736
P15089	spleen,	HCl	mRNA	0	0	0	0	3	417	0.0383693
P16882	liver,	HCl	mRNA	0	0	0	2	0	650	0.0369231
P17095	liver,brain,spleen,heart,	HCl	mRNA	2	6	0	3	8	107	0.28972
P17095-1	spleen,	HCl	mRNA	0	0	0	0	5	96	0.53125
P18608	liver,brain,spleen,kidney,heart,	HCl	mRNA	2	4	5	4	10	96	0.489583
P19973	spleen,	HCl	mRNA	0	0	0	0	57	330	0.866667
P20065	liver,brain,spleen,kidney,heart,	HCl	mRNA	19	6	10	9	19	50	0.4
P21812	spleen,heart,	HCl	mRNA	0	2	0	0	6	246	0.105691
P22005	brain,	HCl	mRNA	5	0	0	0	0	268	0.205224
P23242	brain,	HCl	mRNA	9	0	0	0	0	382	0.164921
P27546	heart,	HCl	mRNA	0	42	0	0	0	1125	0.446222
P27546-2	heart,	HCl	mRNA	0	42	0	0	0	1124	0.44573
P28033	liver,	HCl	mRNA	0	0	0	3	0	296	0.0743243
P31650	brain,	HCl	mRNA	4	0	0	0	0	627	0.062201
P33175	brain,	HCl	mRNA	2	0	0	0	0	1027	0.0282376
P35454	brain,	HCl	mRNA	7	0	0	0	0	125	0.544
P35455	brain,	HCl	mRNA	5	0	0	0	0	168	0.327381
P35569	liver,brain,	HCl	mRNA	3	0	0	3	0	1233	0.0454177
P35802	brain,	HCl	mRNA	5	0	0	0	0	278	0.0935252
P37913	spleen,	HCl	mRNA	0	0	0	0	6	916	0.0622271
P41539	brain,	HCl	mRNA	2	0	0	0	0	130	0.192308
P42925	kidney,	HCl	mRNA	0	0	2	0	0	194	0.103093
P47212	brain,	HCl	mRNA	2	0	0	0	0	124	0.33871
P47877	liver,	HCl	mRNA	0	0	0	2	0	305	0.0983607
P47878	kidney,	HCl	mRNA	0	0	3	0	0	292	0.14726
P47915	spleen,	HCl	mRNA	0	0	0	0	16	160	0.54375
P48772	heart,	HCl	mRNA	0	7	0	0	0	70	0.557143
P49070	brain,	HCl	mRNA	5	0	0	0	0	294	0.265306
P51125-2	spleen,	HCl	mRNA	0	0	0	0	33	769	0.348505
P51637	heart,	HCl	mRNA	0	3	0	0	0	151	0.0794702
P53566-5	liver,	HCl	mRNA	0	0	0	3	0	396	0.030303
P55014	kidney,	HCl	mRNA	0	0	2	0	0	1095	0.03379
P55099	brain,	HCl	mRNA	3	0	0	0	0	116	0.232759
P56388	brain,	HCl	mRNA	5	0	0	0	0	129	0.418605
P56388-2	brain,	HCl	mRNA	5	0	0	0	0	116	0.422414
P56394	liver,brain,kidney,heart,	HCl	mRNA	7	6	9	6	0	63	0.587302
P56654	liver,	HCl	mRNA	0	0	0	2	0	490	0.0530612
P56812	liver,brain,spleen,kidney,heart,	HCl	mRNA	14	14	8	17	12	126	0.626984
P56942	brain,	HCl	mRNA	10	0	0	0	0	165	0.363636
P57774	brain,	HCl	mRNA	4	0	0	0	0	97	0.298969
P58871	kidney,heart,	HCl	mRNA	0	4	16	0	0	1720	0.0226744
P60202	brain,	HCl	mRNA	3	0	0	0	0	277	0.133574
P60840	brain,spleen,kidney,heart,	HCl	mRNA	27	6	4	0	4	121	0.785124
P60904	brain,	HCl	mRNA	2	0	0	0	0	198	0.131313
P61961	liver,brain,spleen,kidney,heart,	HCl	mRNA	5	2	4	5	2	85	0.505882
P61979	spleen,	HCl	mRNA	0	0	0	0	32	463	0.354212
P62500	brain,	HCl	mRNA	8	0	0	0	0	1077	0.0752089
P63024	brain,	HCl	mRNA	3	0	0	0	0	103	0.38835
P63166	spleen,	HCl	mRNA	0	0	0	0	6	101	0.138614
P70121	liver,kidney,	HCl	mRNA	0	0	2	4	0	873	0.0320733
P70211	brain,	HCl	mRNA	3	0	0	0	0	1447	0.0228058
P70365	brain,	HCl	mRNA	4	0	0	0	0	1447	0.0345543
P70445	liver,brain,spleen,	HCl	mRNA	6	0	0	2	4	120	0.666667
P70696	spleen,	HCl	mRNA	0	0	0	0	22	127	0.645669
P81122	brain,	HCl	mRNA	2	0	0	0	0	1321	0.0234671
P84444	spleen,	HCl	mRNA	0	0	0	0	2	133	0.135338
P97314	spleen,	HCl	mRNA	0	0	0	0	2	193	0.11399
P97379-2	kidney,	HCl	mRNA	0	0	5	0	0	449	0.122494
P97492	brain,	HCl	mRNA	4	0	0	0	0	547	0.0621572
P97792	liver,	HCl	mRNA	0	0	0	2	0	365	0.0657534
P97816	kidney,	HCl	mRNA	0	0	16	0	0	79	0.759494
P97825	brain,spleen,heart,	HCl	mRNA	8	5	0	0	7	154	0.655844
P97868	liver,kidney,	HCl	mRNA	0	0	2	4	0	1790	0.0128492
Q00899	spleen,	HCl	mRNA	0	0	0	0	3	414	0.0410628
Q02614	liver,brain,spleen,kidney,	HCl	mRNA	2	0	2	4	4	308	0.0714286
Q03717	brain,	HCl	mRNA	4	0	0	0	0	857	0.0816803
Q05020	heart,	HCl	mRNA	0	2	0	0	0	97	0.216495
Q05860-5	kidney,	HCl	mRNA	0	0	2	0	0	1204	0.013289
Q059P4	heart,	HCl	mRNA	0	6	0	0	0	1214	0.0510708
Q05BA5	spleen,	HCl	mRNA	0	0	0	0	5	1403	0.0541696
Q0KL02-4	brain,	HCl	mRNA	4	0	0	0	0	3103	0.0190139
Q0VAW6	brain,	HCl	mRNA	3	0	0	0	0	399	0.085213
Q0VF59	brain,	HCl	mRNA	8	0	0	0	0	1060	0.0801887
Q149L6	liver,kidney,	HCl	mRNA	0	0	5	3	0	379	0.134565
Q14AE4	kidney,	HCl	mRNA	0	0	2	0	0	130	0.192308
Q14CH0	brain,	HCl	mRNA	9	0	0	0	0	825	0.16
Q3TML0	liver,spleen,	HCl	mRNA	0	0	0	5	2	445	0.155056
Q3TPJ8	kidney,	HCl	mRNA	0	0	9	0	0	632	0.118671
Q3TQI7	liver,brain,spleen,kidney,	HCl	mRNA	3	0	3	2	4	289	0.0865052
Q3TXT3	brain,spleen,	HCl	mRNA	2	0	0	0	2	104	0.230769
Q3TYD6	kidney,	HCl	mRNA	0	0	3	0	0	1471	0.0326309
Q3TZR9	liver,	HCl	mRNA	0	0	0	3	0	483	0.0538302
Q3U106	spleen,	HCl	mRNA	0	0	0	0	2	200	0.095
Q3U182	liver,	HCl	mRNA	0	0	0	2	0	692	0.0476879
Q3U1F9	brain,spleen,	HCl	mRNA	5	0	0	0	7	429	0.214452
Q3U1Z5	liver,brain,spleen,	HCl	mRNA	2	0	0	2	7	159	0.113208
Q3U3E2	brain,	HCl	mRNA	5	0	0	0	0	584	0.106164
Q3U962	liver,heart,	HCl	mRNA	0	5	0	2	0	1497	0.0394122
Q3UEI1	kidney,	HCl	mRNA	0	0	2	0	0	686	0.0655977
Q3UFM6	spleen,	HCl	mRNA	0	0	0	0	7	480	0.189583
Q3UH06-3	liver,	HCl	mRNA	0	0	0	2	0	1754	0.0131129
Q3UHC7	brain,kidney,	HCl	mRNA	4	0	3	0	0	1189	0.0420521
Q3UHD3	brain,	HCl	mRNA	7	0	0	0	0	1353	0.0620843
Q3UHF7	brain,	HCl	mRNA	4	0	0	0	0	2430	0.0308642
Q3UHJ0	brain,	HCl	mRNA	29	0	0	0	0	959	0.332638
Q3UHK1	brain,	HCl	mRNA	3	0	0	0	0	637	0.0172684
Q3UHK6-4	brain,	HCl	mRNA	2	0	0	0	0	2796	0.0157368
Q3UHP6	liver,kidney,	HCl	mRNA	0	0	3	2	0	1189	0.0428932
Q3UHZ5	heart,	HCl	mRNA	0	8	0	0	0	550	0.2
Q3USB7	brain,	HCl	mRNA	4	0	0	0	0	1096	0.0383212
Q3UVX5	brain,	HCl	mRNA	3	0	0	0	0	1203	0.0274314
Q3UYI5	liver,	HCl	mRNA	0	0	0	2	0	709	0.0521862
Q3UZA1	heart,	HCl	mRNA	0	14	0	0	0	412	0.51699
Q3ZB57	brain,	HCl	mRNA	4	0	0	0	0	666	0.0915916
Q4ACU6-9	brain,	HCl	mRNA	25	0	0	0	0	1112	0.304856
Q4KL35	liver,	HCl	mRNA	0	0	0	5	0	324	0.145062
Q4VGL6	spleen,	HCl	mRNA	0	0	0	0	2	1130	0.0256637
Q56A08	liver,brain,spleen,	HCl	mRNA	2	0	0	2	4	488	0.0512295
Q5BL07	liver,	HCl	mRNA	0	0	0	2	0	1284	0.0202492
Q5F2E7-2	liver,brain,spleen,kidney,	HCl	mRNA	2	0	2	3	3	710	0.0295775
Q5SFM8	liver,kidney,	HCl	mRNA	0	0	5	4	0	1060	0.0481132
Q5SPX8	kidney,	HCl	mRNA	0	0	3	0	0	534	0.0973783
Q5SQY2	brain,heart,	HCl	mRNA	9	2	0	0	0	173	0.473988
Q5SS90	kidney,	HCl	mRNA	0	0	4	0	0	291	0.202749
Q5STS9	spleen,	HCl	mRNA	0	0	0	0	2	835	0.0311377
Q5SVJ0	brain,	HCl	mRNA	8	0	0	0	0	666	0.142643
Q5SVQ0	spleen,	HCl	mRNA	0	0	0	0	3	613	0.0489396
Q5SW75-4	brain,	HCl	mRNA	3	0	0	0	0	1450	0.0358621
Q5SYH2	liver,	HCl	mRNA	0	0	0	2	0	208	0.0913462
Q5U4C1	brain,	HCl	mRNA	2	0	0	0	0	1347	0.0193022
Q5XJV5	brain,	HCl	mRNA	2	0	0	0	0	2069	0.022233
Q60597-3	brain,kidney,heart,	HCl	mRNA	2	5	3	0	0	1038	0.00674374
Q60710	spleen,	HCl	mRNA	0	0	0	0	4	627	0.076555
Q60775	spleen,	HCl	mRNA	0	0	0	0	3	612	0.0915033
Q60862	spleen,kidney,	HCl	mRNA	0	0	3	0	4	576	0.0451389
Q60876	spleen,heart,	HCl	mRNA	0	2	0	0	3	117	0.153846
Q61017	spleen,	HCl	mRNA	0	0	0	0	2	69	0.246377
Q61120	brain,	HCl	mRNA	5	0	0	0	0	474	0.0548523
Q61140	liver,brain,	HCl	mRNA	6	0	0	2	0	874	0.090389
Q61152	spleen,	HCl	mRNA	0	0	0	0	3	453	0.0993377
Q61164	spleen,	HCl	mRNA	0	0	0	0	3	736	0.0271739
Q61234	liver,kidney,	HCl	mRNA	0	0	3	2	0	503	0.0377734
Q61481	brain,kidney,	HCl	mRNA	3	0	4	0	0	565	0.040708
Q61526	liver,	HCl	mRNA	0	0	0	3	0	1339	0.0253921
Q61712	liver,kidney,	HCl	mRNA	0	0	5	5	0	552	0.0996377
Q62234	heart,	HCl	mRNA	0	16	0	0	0	1667	0.103179
Q62266	kidney,	HCl	mRNA	0	0	6	0	0	144	0.430556
Q62313	liver,	HCl	mRNA	0	0	0	2	0	353	0.0339943
Q62417-7	liver,	HCl	mRNA	0	0	0	11	0	836	0.157895
Q62504	kidney,	HCl	mRNA	0	0	2	0	0	3644	0.0109769
Q64299	brain,	HCl	mRNA	2	0	0	0	0	354	0.101695
Q64322	brain,	HCl	mRNA	2	0	0	0	0	332	0.0451807
Q64332-2	brain,	HCl	mRNA	17	0	0	0	0	479	0.300626
Q64336	brain,	HCl	mRNA	4	0	0	0	0	681	0.0851689
Q64387-2	brain,	HCl	mRNA	4	0	0	0	0	212	0.226415
Q64512	kidney,	HCl	mRNA	0	0	3	0	0	2453	0.00978394
Q68FM6	brain,	HCl	mRNA	12	0	0	0	0	823	0.108141
Q69Z38	kidney,	HCl	mRNA	0	0	2	0	0	1735	0.0138329
Q69ZL1	liver,	HCl	mRNA	0	0	0	2	0	1399	0.0214439
Q6A037	brain,	HCl	mRNA	2	0	0	0	0	893	0.0279955
Q6A0A2	liver,kidney,	HCl	mRNA	0	0	6	7	0	741	0.0877193
Q6BCL1	spleen,	HCl	mRNA	0	0	0	0	2	675	0.0459259
Q6DIC6	brain,	HCl	mRNA	2	0	0	0	0	2087	0.0158122
Q6P1H6	kidney,	HCl	mRNA	0	0	2	0	0	964	0.0363071
Q6P2L7	kidney,	HCl	mRNA	0	0	4	0	0	435	0.0827586
Q6P539	brain,	HCl	mRNA	2	0	0	0	0	562	0.0338078
Q6P5G6	brain,	HCl	mRNA	3	0	0	0	0	467	0.0877944
Q6PCX7	brain,	HCl	mRNA	2	0	0	0	0	454	0.0881057
Q6PFD5	brain,	HCl	mRNA	3	0	0	0	0	977	0.0348004
Q6PGH2	liver,brain,spleen,kidney,heart,	HCl	mRNA	7	3	3	7	5	190	0.536842
Q6PR54-3	spleen,	HCl	mRNA	0	0	0	0	4	2426	0.0181369
Q6QWF9	brain,	HCl	mRNA	6	0	0	0	0	78	0.576923
Q6S9I0	heart,	HCl	mRNA	0	4	0	0	0	433	0.0692841
Q6W8Q3	brain,heart,	HCl	mRNA	12	8	0	0	0	68	0.705882
Q6WKZ7	liver,	HCl	mRNA	0	0	0	3	0	506	0.0375494
Q6WQJ1	brain,	HCl	mRNA	2	0	0	0	0	1044	0.0220307
Q6ZPF3	brain,	HCl	mRNA	2	0	0	0	0	1715	0.012828
Q6ZPJ0	brain,	HCl	mRNA	2	0	0	0	0	1128	0.016844
Q6ZQ58	liver,brain,kidney,	HCl	mRNA	4	0	3	8	0	1072	0.0625
Q6ZWY8	liver,brain,spleen,kidney,heart,	HCl	mRNA	8	2	3	2	12	44	0.454545
Q76LS9	liver,	HCl	mRNA	0	0	0	3	0	468	0.042735
Q78TF3	brain,	HCl	mRNA	2	0	0	0	0	99	0.484848
Q78WH7	brain,kidney,	HCl	mRNA	7	0	2	0	0	79	0.544304
Q78YZ6	brain,spleen,kidney,heart,	HCl	mRNA	3	3	2	0	3	125	0.144
Q7M750	brain,	HCl	mRNA	3	0	0	0	0	143	0.300699
Q7TMA2	kidney,	HCl	mRNA	0	0	3	0	0	652	0.0521472
Q7TMF3	liver,brain,kidney,heart,	HCl	mRNA	3	10	4	4	0	145	0.2
Q7TNL9	liver,brain,kidney,heart,	HCl	mRNA	7	23	9	18	0	138	0.166667
Q7TQE6	kidney,	HCl	mRNA	0	0	2	0	0	664	0.0165663
Q7TQH0-2	brain,	HCl	mRNA	16	0	0	0	0	1074	0.163873
Q80T14	kidney,	HCl	mRNA	0	0	2	0	0	4010	0.00249377
Q80T41	brain,	HCl	mRNA	4	0	0	0	0	940	0.0531915
Q80T85	liver,brain,	HCl	mRNA	3	0	0	2	0	946	0.0443975
Q80TF3	brain,	HCl	mRNA	3	0	0	0	0	1145	0.0331878
Q80U04	brain,	HCl	mRNA	4	0	0	0	0	707	0.0509194
Q80U44	kidney,	HCl	mRNA	0	0	4	0	0	1528	0.0327225
Q80U58	spleen,	HCl	mRNA	0	0	0	0	2	1066	0.0262664
Q80V24	brain,	HCl	mRNA	2	0	0	0	0	287	0.0905923
Q80VB6	brain,	HCl	mRNA	5	0	0	0	0	363	0.168044
Q80VP0	brain,	HCl	mRNA	3	0	0	0	0	1166	0.0325901
Q80VW7	spleen,	HCl	mRNA	0	0	0	0	2	1404	0.00997151
Q80WJ7	spleen,	HCl	mRNA	0	0	0	0	5	579	0.11399
Q80WK2	kidney,	HCl	mRNA	0	0	3	0	0	128	0.273438
Q80WR5	liver,spleen,kidney,	HCl	mRNA	0	0	3	4	2	230	0.186957
Q80X80	kidney,	HCl	mRNA	0	0	7	0	0	706	0.144476
Q80Y55	brain,kidney,	HCl	mRNA	3	0	3	0	0	427	0.107728
Q80ZF8	brain,	HCl	mRNA	2	0	0	0	0	1522	0.0190539
Q8BFQ1	brain,spleen,kidney,	HCl	mRNA	13	0	10	0	6	554	0.202166
Q8BGD8	liver,brain,kidney,heart,	HCl	mRNA	4	5	4	4	0	79	0.379747
Q8BGV3	kidney,	HCl	mRNA	0	0	3	0	0	317	0.0788644
Q8BGY3	brain,	HCl	mRNA	3	0	0	0	0	345	0.124638
Q8BH27	brain,	HCl	mRNA	2	0	0	0	0	600	0.0483333
Q8BH40	spleen,	HCl	mRNA	0	0	0	0	5	261	0.206897
Q8BHL3	brain,	HCl	mRNA	8	0	0	0	0	798	0.115288
Q8BI29	kidney,	HCl	mRNA	0	0	2	0	0	606	0.0594059
Q8BJL0	brain,	HCl	mRNA	2	0	0	0	0	910	0.0472527
Q8BKI2	liver,brain,spleen,	HCl	mRNA	2	0	0	3	2	1810	0.0176796
Q8BM65-4	brain,	HCl	mRNA	4	0	0	0	0	748	0.0454545
Q8BP43	heart,	HCl	mRNA	0	343	0	0	0	284	0.834507
Q8BQ30-2	spleen,kidney,	HCl	mRNA	0	0	2	0	3	609	0.0394089
Q8BRJ3	brain,	HCl	mRNA	3	0	0	0	0	303	0.148515
Q8BSZ2	brain,	HCl	mRNA	2	0	0	0	0	193	0.0984456
Q8BT51	liver,brain,kidney,heart,	HCl	mRNA	3	3	3	3	0	87	0.356322
Q8BTE0	brain,heart,	HCl	mRNA	2	3	0	0	0	104	0.173077
Q8BTW9	liver,kidney,	HCl	mRNA	0	0	3	3	0	593	0.0522766
Q8BXR9	kidney,	HCl	mRNA	0	0	3	0	0	959	0.0396246
Q8BYK6-3	brain,	HCl	mRNA	5	0	0	0	0	596	0.0973154
Q8BZB3	brain,	HCl	mRNA	3	0	0	0	0	538	0.157993
Q8BZW2	liver,	HCl	mRNA	0	0	0	2	0	760	0.0460526
Q8BZY3	spleen,	HCl	mRNA	0	0	0	0	4	494	0.0728745
Q8C080	brain,	HCl	mRNA	3	0	0	0	0	344	0.0784884
Q8C0C0	liver,	HCl	mRNA	0	0	0	3	0	836	0.0311005
Q8C0E9	brain,	HCl	mRNA	3	0	0	0	0	390	0.110256
Q8C0Q2	liver,kidney,	HCl	mRNA	0	0	3	4	0	951	0.0609884
Q8C0W0	brain,	HCl	mRNA	4	0	0	0	0	80	0.65
Q8C3F2	brain,	HCl	mRNA	2	0	0	0	0	1091	0.0284143
Q8C3Q5	brain,	HCl	mRNA	4	0	0	0	0	558	0.0752688
Q8C4C9	liver,kidney,	HCl	mRNA	0	0	3	8	0	378	0.0740741
Q8C5V4	kidney,	HCl	mRNA	0	0	2	0	0	481	0.04158
Q8C5W0	liver,brain,kidney,	HCl	mRNA	6	0	13	12	0	1052	0.0674905
Q8C729-2	brain,	HCl	mRNA	4	0	0	0	0	586	0.0699659
Q8C788	liver,brain,kidney,	HCl	mRNA	2	0	3	2	0	615	0.0357724
Q8C7I4	liver,	HCl	mRNA	0	0	0	2	0	310	0.0483871
Q8C8T7	brain,	HCl	mRNA	4	0	0	0	0	828	0.076087
Q8CAQ8-2	kidney,	HCl	mRNA	0	0	16	0	0	746	0.257373
Q8CB27	liver,	HCl	mRNA	0	0	0	2	0	343	0.0699708
Q8CBC4	brain,	HCl	mRNA	3	0	0	0	0	711	0.0464135
Q8CC35-3	brain,	HCl	mRNA	28	0	0	0	0	690	0.484058
Q8CD94	brain,	HCl	mRNA	2	0	0	0	0	116	0.0775862
Q8CDA1	brain,	HCl	mRNA	3	0	0	0	0	1132	0.0353357
Q8CFK6	spleen,	HCl	mRNA	0	0	0	0	2	786	0.0330789
Q8CFN5	brain,	HCl	mRNA	4	0	0	0	0	474	0.109705
Q8CGN5	kidney,	HCl	mRNA	0	0	6	0	0	517	0.183752
Q8CGP1	spleen,	HCl	mRNA	0	0	0	0	55	126	0.746032
Q8CHP5	liver,spleen,	HCl	mRNA	0	0	0	4	4	203	0.236453
Q8CI08-2	spleen,	HCl	mRNA	0	0	0	0	2	607	0.0724876
Q8CI51-2	heart,	HCl	mRNA	0	57	0	0	0	337	0.391691
Q8CI61	brain,	HCl	mRNA	3	0	0	0	0	457	0.0853392
Q8JZX9	brain,	HCl	mRNA	3	0	0	0	0	214	0.238318
Q8JZZ7-2	brain,	HCl	mRNA	3	0	0	0	0	1551	0.030303
Q8K003	liver,spleen,	HCl	mRNA	0	0	0	3	2	64	0.390625
Q8K021	brain,kidney,	HCl	mRNA	6	0	5	0	0	338	0.224852
Q8K039	liver,spleen,	HCl	mRNA	0	0	0	2	2	155	0.0709677
Q8K0S2	brain,	HCl	mRNA	2	0	0	0	0	362	0.0994475
Q8K1N1	brain,heart,	HCl	mRNA	2	3	0	0	0	776	0.0425258
Q8K2F8	brain,spleen,	HCl	mRNA	4	0	0	0	7	462	0.0649351
Q8K2T4	kidney,	HCl	mRNA	0	0	3	0	0	89	0.11236
Q8K327	spleen,	HCl	mRNA	0	0	0	0	3	802	0.063591
Q8K4J6	brain,	HCl	mRNA	2	0	0	0	0	964	0.0217842
Q8R0E2	heart,	HCl	mRNA	0	2	0	0	0	107	0.130841
Q8R0L1	liver,	HCl	mRNA	0	0	0	2	0	411	0.0681265
Q8R1B5	brain,	HCl	mRNA	5	0	0	0	0	158	0.417722
Q8R1F0	spleen,	HCl	mRNA	0	0	0	0	2	94	0.180851
Q8R1H0	liver,heart,	HCl	mRNA	0	5	0	2	0	73	0.356164
Q8R1M2	spleen,	HCl	mRNA	0	0	0	0	20	129	0.72093
Q8R1X6	liver,	HCl	mRNA	0	0	0	5	0	671	0.114754
Q8R404	kidney,	HCl	mRNA	0	0	2	0	0	119	0.117647
Q8VCD6	brain,	HCl	mRNA	6	0	0	0	0	254	0.248031
Q8VCI5	brain,	HCl	mRNA	2	0	0	0	0	299	0.09699
Q8VCQ3	liver,	HCl	mRNA	0	0	0	2	0	287	0.0383275
Q8VCS6	brain,	HCl	mRNA	3	0	0	0	0	142	0.105634
Q8VD63	brain,	HCl	mRNA	3	0	0	0	0	406	0.091133
Q8VDT9	liver,kidney,heart,	HCl	mRNA	0	4	7	5	0	159	0.358491
Q8VDZ4	liver,brain,spleen,kidney,	HCl	mRNA	7	0	3	5	3	715	0.13986
Q8VIM4	kidney,	HCl	mRNA	0	0	3	0	0	307	0.175896
Q91V14	brain,	HCl	mRNA	3	0	0	0	0	1138	0.0193322
Q91W18	spleen,kidney,	HCl	mRNA	0	0	6	0	2	743	0.0874832
Q91W92	brain,	HCl	mRNA	2	0	0	0	0	409	0.0880196
Q91X96	liver,	HCl	mRNA	0	0	0	3	0	123	0.195122
Q91XC8	liver,kidney,heart,	HCl	mRNA	0	2	3	20	0	102	0.245098
Q91XH5	kidney,	HCl	mRNA	0	0	3	0	0	262	0.156489
Q91XH6	liver,kidney,	HCl	mRNA	0	0	2	3	0	232	0.12069
Q91YE8	heart,	HCl	mRNA	0	8	0	0	0	1087	0.0929163
Q91YM2	brain,	HCl	mRNA	2	0	0	0	0	1499	0.0226818
Q91Z49	liver,heart,	HCl	mRNA	0	3	0	2	0	317	0.123028
Q91Z96	spleen,	HCl	mRNA	0	0	0	0	6	1138	0.0623902
Q921K9	spleen,	HCl	mRNA	0	0	0	0	2	202	0.173267
Q922B9	liver,kidney,	HCl	mRNA	0	0	6	3	0	1252	0.034345
Q923A8	liver,	HCl	mRNA	0	0	0	2	0	606	0.0363036
Q925B0	liver,spleen,kidney,	HCl	mRNA	0	0	6	3	2	333	0.249249
Q925I8	brain,	HCl	mRNA	4	0	0	0	0	1040	0.0548077
Q99020	spleen,heart,	HCl	mRNA	0	8	0	0	22	285	0.301754
Q99JI1	heart,	HCl	mRNA	0	2	0	0	0	82	0.134146
Q99JP4	liver,brain,spleen,kidney,heart,	HCl	mRNA	5	3	6	4	2	85	0.517647
Q99K01-4	brain,	HCl	mRNA	4	0	0	0	0	793	0.0832282
Q99LH8	spleen,	HCl	mRNA	0	0	0	0	3	637	0.0392465
Q99M07	liver,kidney,heart,	HCl	mRNA	0	2	2	3	0	74	0.445946
Q99MB2	liver,	HCl	mRNA	0	0	0	2	0	328	0.0365854
Q99NH0	liver,brain,kidney,heart,	HCl	mRNA	5	2	4	4	0	2603	0.0261237
Q99PG2-2	kidney,	HCl	mRNA	0	0	4	0	0	597	0.150754
Q99PP7	spleen,	HCl	mRNA	0	0	0	0	2	1142	0.00963222
Q9CPR1	liver,	HCl	mRNA	0	0	0	3	0	188	0.0478723
Q9CQ73	heart,	HCl	mRNA	0	3	0	0	0	795	0.0427673
Q9CQ91	kidney,heart,	HCl	mRNA	0	3	2	0	0	84	0.416667
Q9CQP0	liver,	HCl	mRNA	0	0	0	2	0	65	0.2
Q9CQU5	brain,spleen,	HCl	mRNA	3	0	0	0	2	252	0.150794
Q9CRC6	brain,spleen,kidney,heart,	HCl	mRNA	8	2	2	0	2	105	0.714286
Q9CW07	brain,	HCl	mRNA	3	0	0	0	0	347	0.0720461
Q9CWU4	brain,spleen,	HCl	mRNA	4	0	0	0	2	180	0.233333
Q9CWW6	liver,spleen,kidney,	HCl	mRNA	0	0	3	7	8	131	0.251908
Q9CX60	spleen,	HCl	mRNA	0	0	0	0	7	105	0.380952
Q9CXF0	liver,	HCl	mRNA	0	0	0	2	0	464	0.0301724
Q9CXU9	kidney,	HCl	mRNA	0	0	7	0	0	113	0.469027
Q9CXX9	brain,	HCl	mRNA	4	0	0	0	0	284	0.084507
Q9CY27	liver,	HCl	mRNA	0	0	0	4	0	308	0.0941558
Q9CY58-2	spleen,	HCl	mRNA	0	0	0	0	50	392	0.645408
Q9D115	spleen,kidney,	HCl	mRNA	0	0	2	0	5	76	0.236842
Q9D1C3	brain,kidney,	HCl	mRNA	3	0	2	0	0	112	0.473214
Q9D1L0	kidney,	HCl	mRNA	0	0	6	0	0	153	0.352941
Q9D1L9	liver,brain,spleen,kidney,heart,	HCl	mRNA	13	7	12	13	7	91	0.967033
Q9D1Q4	kidney,	HCl	mRNA	0	0	2	0	0	92	0.23913
Q9D1R2	liver,	HCl	mRNA	0	0	0	2	0	351	0.0655271
Q9D2R6	kidney,	HCl	mRNA	0	0	3	0	0	108	0.185185
Q9D6K8	kidney,	HCl	mRNA	0	0	2	0	0	151	0.0728477
Q9D6T9	liver,brain,kidney,heart,	HCl	mRNA	18	19	30	16	0	100	0.75
Q9D710	liver,	HCl	mRNA	0	0	0	2	0	295	0.0779661
Q9D727	liver,kidney,	HCl	mRNA	0	0	5	4	0	114	0.684211
Q9D735	brain,spleen,kidney,	HCl	mRNA	2	0	2	0	6	173	0.213873
Q9D7E4	brain,spleen,kidney,	HCl	mRNA	7	0	3	0	7	109	0.605505
Q9D809	liver,	HCl	mRNA	0	0	0	3	0	114	0.22807
Q9D8V0	kidney,	HCl	mRNA	0	0	2	0	0	378	0.0687831
Q9D8Z2	liver,brain,spleen,kidney,heart,	HCl	mRNA	11	2	7	7	4	76	0.776316
Q9D9Z5	kidney,	HCl	mRNA	0	0	2	0	0	102	0.27451
Q9DAU7	kidney,	HCl	mRNA	0	0	4	0	0	174	0.454023
Q9DB24	brain,	HCl	mRNA	32	0	0	0	0	200	0.61
Q9DB52	brain,	HCl	mRNA	3	0	0	0	0	284	0.140845
Q9DBM1	kidney,	HCl	mRNA	0	0	2	0	0	930	0.027957
Q9DBN4	brain,kidney,	HCl	mRNA	7	0	14	0	0	303	0.244224
Q9DC28	brain,	HCl	mRNA	2	0	0	0	0	415	0.0626506
Q9DC77	brain,heart,	HCl	mRNA	2	16	0	0	0	85	0.447059
Q9DCB1	spleen,	HCl	mRNA	0	0	0	0	4	99	0.393939
Q9DCH6	liver,kidney,	HCl	mRNA	0	0	3	3	0	223	0.0941704
Q9DCL8	brain,spleen,kidney,heart,	HCl	mRNA	15	5	2	0	6	206	0.436893
Q9DCP2	liver,	HCl	mRNA	0	0	0	5	0	505	0.0792079
Q9DCS1	kidney,	HCl	mRNA	0	0	2	0	0	244	0.0942623
Q9EPQ8	brain,	HCl	mRNA	3	0	0	0	0	1987	0.018621
Q9EPR4	brain,	HCl	mRNA	3	0	0	0	0	648	0.0262346
Q9EQS3	kidney,	HCl	mRNA	0	0	11	0	0	103	0.737864
Q9ERT9	brain,kidney,	HCl	mRNA	29	0	6	0	0	171	0.883041
Q9ES83	heart,	HCl	mRNA	0	2	0	0	0	358	0.111732
Q9ESG4	kidney,	HCl	mRNA	0	0	3	0	0	222	0.0630631
Q9ESJ4	brain,	HCl	mRNA	2	0	0	0	0	714	0.0322129
Q9EST3	brain,	HCl	mRNA	3	0	0	0	0	983	0.0305188
Q9ET54-5	spleen,	HCl	mRNA	0	0	0	0	6	670	0.0850746
Q9JHL1	kidney,	HCl	mRNA	0	0	27	0	0	337	0.673591
Q9JHR9	brain,	HCl	mRNA	7	0	0	0	0	270	0.162963
Q9JI10	kidney,	HCl	mRNA	0	0	2	0	0	497	0.0221328
Q9JI78	liver,	HCl	mRNA	0	0	0	3	0	651	0.0645161
Q9JID9	brain,	HCl	mRNA	2	0	0	0	0	621	0.0193237
Q9JIX0	spleen,kidney,heart,	HCl	mRNA	0	2	4	0	5	101	0.257426
Q9JIX8-4	liver,spleen,kidney,	HCl	mRNA	0	0	11	16	23	1298	0.0701079
Q9JJK5	liver,	HCl	mRNA	0	0	0	5	0	391	0.15601
Q9JJN6	brain,	HCl	mRNA	3	0	0	0	0	81	0.37037
Q9JLB9	kidney,	HCl	mRNA	0	0	2	0	0	549	0.0491803
Q9JLI2	heart,	HCl	mRNA	0	2	0	0	0	1739	0.0189764
Q9JLM9	liver,	HCl	mRNA	0	0	0	4	0	538	0.0817844
Q9JM93	kidney,	HCl	mRNA	0	0	3	0	0	229	0.0655022
Q9QUN3	spleen,	HCl	mRNA	0	0	0	0	4	457	0.100656
Q9QXD8	liver,spleen,	HCl	mRNA	0	0	0	2	5	668	0.0538922
Q9QXN3	liver,	HCl	mRNA	0	0	0	2	0	581	0.0378657
Q9QY06-2	spleen,	HCl	mRNA	0	0	0	0	4	2143	0.0307979
Q9QYH6	brain,	HCl	mRNA	10	0	0	0	0	775	0.105806
Q9QZJ6	heart,	HCl	mRNA	0	3	0	0	0	164	0.0670732
Q9R0P4	liver,brain,spleen,kidney,	HCl	mRNA	6	0	2	5	7	181	0.259669
Q9R0Q1	spleen,	HCl	mRNA	0	0	0	0	2	673	0.0297177
Q9R1E0	brain,spleen,	HCl	mRNA	2	0	0	0	4	652	0.059816
Q9R1L5	brain,	HCl	mRNA	8	0	0	0	0	1570	0.0732484
Q9R1Q6	kidney,	HCl	mRNA	0	0	2	0	0	263	0.102662
Q9R207	liver,spleen,	HCl	mRNA	0	0	0	3	4	751	0.0505992
Q9R269	kidney,	HCl	mRNA	0	0	8	0	0	1755	0.0404558
Q9WTU0	spleen,kidney,	HCl	mRNA	0	0	2	0	5	1096	0.0209854
Q9WU40-2	brain,kidney,	HCl	mRNA	2	0	2	0	0	943	0.0371156
Q9WV69	brain,heart,	HCl	mRNA	19	2	0	0	0	405	0.558025
Q9WV92-7	kidney,	HCl	mRNA	0	0	34	0	0	823	0.308627
Q9Z0P4-2	brain,	HCl	mRNA	46	0	0	0	0	339	0.587021
Q9Z2E1	liver,spleen,kidney,	HCl	mRNA	0	0	4	2	7	414	0.0990338
Q9Z2S7-4	brain,	HCl	mRNA	6	0	0	0	0	234	0.252137
S4R2L4	spleen,	HCl	mRNA	0	0	0	0	2	434	0.0668203
V9GWU7	brain,	HCl	mRNA	2	0	0	0	0	1789	0.0100615
XP_001480548.2	kidney,	HCl	mRNA	0	0	3	0	0	399	0.0676692
XP_006495839.1	brain,	HCl	mRNA	2	0	0	0	0	2109	0.0175439
XP_006496831.1	spleen,	HCl	mRNA	0	0	0	0	24	2846	0.119817
XP_006497491.1	brain,	HCl	mRNA	16	0	0	0	0	1398	0.168097
XP_006497604.1	brain,	HCl	mRNA	9	0	0	0	0	1956	0.0674847
XP_006497961.1	brain,	HCl	mRNA	4	0	0	0	0	1603	0.0380536
XP_006498011.1	liver,spleen,kidney,	HCl	mRNA	0	0	3	3	2	2231	0.017481
XP_006498061.1	liver,brain,spleen,kidney,	HCl	mRNA	3	0	6	2	2	1078	0.0426716
XP_006498256.1	liver,kidney,	HCl	mRNA	0	0	3	5	0	954	0.0461216
XP_006499280.1	liver,kidney,	HCl	mRNA	0	0	11	26	0	1045	0.155981
XP_006499441.1	spleen,	HCl	mRNA	0	0	0	0	3	1266	0.0379147
XP_006500445.1	brain,	HCl	mRNA	27	0	0	0	0	607	0.350906
XP_006500759.1	brain,spleen,kidney,	HCl	mRNA	12	0	14	0	7	210	0.461905
XP_006500953.1	brain,	HCl	mRNA	41	0	0	0	0	4008	0.138224
XP_006501565.1	brain,	HCl	mRNA	8	0	0	0	0	1575	0.0698413
XP_006501582.1	brain,	HCl	mRNA	6	0	0	0	0	2957	0.0273926
XP_006501794.1	brain,	HCl	mRNA	2	0	0	0	0	537	0.0260708
XP_006502331.1	brain,	HCl	mRNA	3	0	0	0	0	698	0.0673352
XP_006502411.1	kidney,	HCl	mRNA	0	0	4	0	0	2871	0.0184605
XP_006502477.1	brain,	HCl	mRNA	3	0	0	0	0	929	0.01507
XP_006502765.1	kidney,	HCl	mRNA	0	0	7	0	0	1825	0.0438356
XP_006502972.1	spleen,	HCl	mRNA	0	0	0	0	2	335	0.0835821
XP_006503607.1	brain,	HCl	mRNA	3	0	0	0	0	477	0.0545073
XP_006503736.1	heart,	HCl	mRNA	0	3	0	0	0	692	0.0722543
XP_006503745.1	brain,	HCl	mRNA	2	0	0	0	0	820	0.0414634
XP_006503969.1	brain,	HCl	mRNA	9	0	0	0	0	715	0.173427
XP_006504002.1	kidney,	HCl	mRNA	0	0	2	0	0	636	0.0393082
XP_006504083.1	brain,	HCl	mRNA	6	0	0	0	0	1267	0.0694554
XP_006504178.1	kidney,	HCl	mRNA	0	0	2	0	0	1333	0.0270068
XP_006504540.1	liver,kidney,	HCl	mRNA	0	0	5	4	0	929	0.0430571
XP_006505409.2	spleen,	HCl	mRNA	0	0	0	0	37	766	0.357702
XP_006505411.1	liver,brain,kidney,heart,	HCl	mRNA	5	20	44	52	0	773	0.100906
XP_006505415.1	liver,kidney,heart,	HCl	mRNA	0	18	41	47	0	537	0.296089
XP_006506207.1	brain,	HCl	mRNA	11	0	0	0	0	1104	0.120471
XP_006506926.1	liver,	HCl	mRNA	0	0	0	3	0	1270	0.0314961
XP_006507161.1	liver,	HCl	mRNA	0	0	0	4	0	1021	0.0391773
XP_006507864.1	brain,	HCl	mRNA	2	0	0	0	0	2907	0.0130719
XP_006509055.1	brain,	HCl	mRNA	2	0	0	0	0	1925	0.012987
XP_006509460.1	kidney,	HCl	mRNA	0	0	5	0	0	442	0.138009
XP_006509632.1	kidney,	HCl	mRNA	0	0	2	0	0	2162	0.00971323
XP_006509770.1	liver,	HCl	mRNA	0	0	0	3	0	1360	0.0227941
XP_006509916.1	brain,	HCl	mRNA	5	0	0	0	0	492	0.148374
XP_006509979.2	brain,	HCl	mRNA	2	0	0	0	0	1555	0.022508
XP_006510131.1	brain,	HCl	mRNA	9	0	0	0	0	895	0.0670391
XP_006510505.1	brain,kidney,	HCl	mRNA	14	0	3	0	0	2103	0.086543
XP_006510677.1	liver,brain,	HCl	mRNA	3	0	0	2	0	707	0.0650636
XP_006511113.1	heart,	HCl	mRNA	0	189	0	0	0	248	0.721774
XP_006511473.1	brain,	HCl	mRNA	6	0	0	0	0	1036	0.0897683
XP_006511479.1	heart,	HCl	mRNA	0	17	0	0	0	988	0.17915
XP_006512048.1	kidney,	HCl	mRNA	0	0	2	0	0	733	0.0122783
XP_006512389.1	brain,	HCl	mRNA	7	0	0	0	0	843	0.0438909
XP_006512454.1	spleen,	HCl	mRNA	0	0	0	0	5	1532	0.0274151
XP_006512749.1	brain,	HCl	mRNA	4	0	0	0	0	1661	0.0391331
XP_006512766.1	kidney,	HCl	mRNA	0	0	3	0	0	342	0.0701754
XP_006513228.1	brain,spleen,kidney,	HCl	mRNA	3	0	4	0	3	176	0.261364
XP_006514688.1	brain,kidney,	HCl	mRNA	4	0	5	0	0	961	0.0478668
XP_006514843.1	liver,	HCl	mRNA	0	0	0	2	0	399	0.0325815
XP_006515313.1	brain,kidney,	HCl	mRNA	8	0	3	0	0	1794	0.0602007
XP_006515635.2	liver,brain,kidney,	HCl	mRNA	4	0	2	5	0	740	0.0567568
XP_006515932.1	liver,kidney,	HCl	mRNA	0	0	7	2	0	1362	0.0359765
XP_006516221.1	brain,kidney,	HCl	mRNA	4	0	3	0	0	433	0.0808314
XP_006516536.1	liver,	HCl	mRNA	0	0	0	3	0	1616	0.0160891
XP_006516658.1	spleen,	HCl	mRNA	0	0	0	0	2	639	0.057903
XP_006518844.1	spleen,	HCl	mRNA	0	0	0	0	12	348	0.293103
XP_006518968.1	brain,	HCl	mRNA	3	0	0	0	0	1185	0.0295359
XP_006519251.1	kidney,	HCl	mRNA	0	0	22	0	0	1392	0.144397
XP_006520332.1	brain,	HCl	mRNA	5	0	0	0	0	1620	0.0345679
XP_006520455.1	brain,	HCl	mRNA	11	0	0	0	0	1223	0.0678659
XP_006520645.1	liver,brain,	HCl	mRNA	4	0	0	10	0	366	0.142077
XP_006520819.1	heart,	HCl	mRNA	0	4	0	0	0	495	0.0707071
XP_006521316.2	brain,	HCl	mRNA	4	0	0	0	0	525	0.0819048
XP_006521330.1	brain,spleen,	HCl	mRNA	2	0	0	0	9	679	0.0353461
XP_006521461.1	brain,	HCl	mRNA	6	0	0	0	0	978	0.0797546
XP_006521493.1	spleen,kidney,	HCl	mRNA	0	0	2	0	2	1472	0.0190217
XP_006521627.1	heart,	HCl	mRNA	0	2	0	0	0	488	0.045082
XP_006521830.1	brain,	HCl	mRNA	3	0	0	0	0	906	0.0607064
XP_006522158.1	heart,	HCl	mRNA	0	2	0	0	0	2952	0.0179539
XP_006522161.1	spleen,	HCl	mRNA	0	0	0	0	4	800	0.05625
XP_006522471.1	liver,kidney,	HCl	mRNA	0	0	4	4	0	746	0.0469169
XP_006523809.1	spleen,	HCl	mRNA	0	0	0	0	2	239	0.125523
XP_006523825.1	liver,	HCl	mRNA	0	0	0	16	0	1893	0.104596
XP_006524116.1	liver,spleen,	HCl	mRNA	0	0	0	5	2	1143	0.0297463
XP_006524303.1	brain,	HCl	mRNA	11	0	0	0	0	1341	0.111111
XP_006524912.1	brain,	HCl	mRNA	2	0	0	0	0	2022	0.0197824
XP_006525777.1	kidney,	HCl	mRNA	0	0	3	0	0	1849	0.0216333
XP_006525863.1	liver,	HCl	mRNA	0	0	0	25	0	1814	0.155458
XP_006526387.1	brain,	HCl	mRNA	21	0	0	0	0	1114	0.192998
XP_006526518.1	brain,	HCl	mRNA	45	0	0	0	0	309	0.368932
XP_006526770.2	spleen,	HCl	mRNA	0	0	0	0	3	887	0.0281849
XP_006526808.1	heart,	HCl	mRNA	0	2	0	0	0	1729	0.0190862
XP_006526855.1	spleen,	HCl	mRNA	0	0	0	0	7	2079	0.039442
XP_006527267.1	brain,	HCl	mRNA	4	0	0	0	0	687	0.125182
XP_006527285.1	heart,	HCl	mRNA	0	11	0	0	0	263	0.441065
XP_006527864.1	liver,	HCl	mRNA	0	0	0	2	0	339	0.0648968
XP_006527949.1	brain,	HCl	mRNA	2	0	0	0	0	243	0.115226
XP_006528990.1	spleen,	HCl	mRNA	0	0	0	0	20	672	0.1875
XP_006529254.1	brain,	HCl	mRNA	2	0	0	0	0	938	0.0309168
XP_006529266.1	liver,spleen,kidney,	HCl	mRNA	0	0	6	13	12	825	0.106667
XP_006529432.1	brain,spleen,	HCl	mRNA	4	0	0	0	3	2175	0.0317241
XP_006529963.1	spleen,	HCl	mRNA	0	0	0	0	2	3140	0.00796178
XP_006530133.1	spleen,	HCl	mRNA	0	0	0	0	6	208	0.245192
XP_006530134.1	kidney,	HCl	mRNA	0	0	12	0	0	185	0.383784
XP_006530149.1	brain,	HCl	mRNA	2	0	0	0	0	363	0.0550964
XP_006530402.1	kidney,	HCl	mRNA	0	0	3	0	0	761	0.0630749
XP_006530737.1	brain,	HCl	mRNA	3	0	0	0	0	738	0.0609756
XP_006531074.1	brain,	HCl	mRNA	8	0	0	0	0	751	0.131824
XP_006531208.2	spleen,	HCl	mRNA	0	0	0	0	3	1579	0.0253325
XP_006531323.1	kidney,	HCl	mRNA	0	0	3	0	0	488	0.0532787
XP_006531532.1	spleen,kidney,	HCl	mRNA	0	0	2	0	5	1008	0.0178571
XP_006531884.1	heart,	HCl	mRNA	0	2	0	0	0	205	0.126829
XP_006532054.1	brain,	HCl	mRNA	8	0	0	0	0	1380	0.0514493
XP_006532317.1	liver,brain,	HCl	mRNA	4	0	0	2	0	1173	0.026428
XP_006532470.1	kidney,	HCl	mRNA	0	0	16	0	0	401	0.44389
XP_006533042.1	brain,spleen,kidney,	HCl	mRNA	11	0	4	0	2	1330	0.130827
XP_006533073.1	brain,	HCl	mRNA	3	0	0	0	0	419	0.0883055
XP_006533689.1	kidney,	HCl	mRNA	0	0	2	0	0	740	0.0148649
XP_006534078.1	liver,brain,	HCl	mRNA	3	0	0	7	0	498	0.110442
XP_006534090.1	kidney,	HCl	mRNA	0	0	2	0	0	271	0.0848708
XP_006534278.1	liver,kidney,	HCl	mRNA	0	0	8	4	0	1329	0.075997
XP_006534535.1	brain,	HCl	mRNA	12	0	0	0	0	2079	0.0562771
XP_006535065.1	brain,	HCl	mRNA	5	0	0	0	0	1297	0.0593678
XP_006535569.1	brain,	HCl	mRNA	9	0	0	0	0	603	0.127695
XP_006535581.1	brain,	HCl	mRNA	7	0	0	0	0	1371	0.0707513
XP_006536238.2	kidney,	HCl	mRNA	0	0	2	0	0	414	0.0772947
XP_006537546.1	heart,	HCl	mRNA	0	2	0	0	0	236	0.0677966
XP_006538539.1	brain,	HCl	mRNA	5	0	0	0	0	753	0.0996016
XP_006538757.1	liver,brain,spleen,kidney,heart,	HCl	mRNA	4	4	3	3	2	160	0.35
XP_006538773.1	kidney,	HCl	mRNA	0	0	2	0	0	385	0.0727273
XP_006538974.1	spleen,	HCl	mRNA	0	0	0	0	11	929	0.124865
XP_006539608.1	kidney,	HCl	mRNA	0	0	5	0	0	452	0.0597345
XP_006539739.1	liver,	HCl	mRNA	0	0	0	4	0	538	0.128253
XP_006540608.1	brain,	HCl	mRNA	4	0	0	0	0	831	0.0758123
XP_006540717.1	brain,	HCl	mRNA	2	0	0	0	0	780	0.0397436
XP_011237347.1	liver,	HCl	mRNA	0	0	0	4	0	678	0.0516224
XP_011237444.1	spleen,	HCl	mRNA	0	0	0	0	3	1174	0.0289608
XP_011237838.1	brain,	HCl	mRNA	6	0	0	0	0	572	0.159091
XP_011238037.1	liver,	HCl	mRNA	0	0	0	4	0	541	0.025878
XP_011238437.1	liver,kidney,	HCl	mRNA	0	0	4	3	0	1071	0.0326797
XP_011239124.1	liver,brain,spleen,kidney,	HCl	mRNA	2	0	2	9	2	2546	0.0106049
XP_011239384.1	brain,	HCl	mRNA	3	0	0	0	0	543	0.0589319
XP_011239898.1	kidney,	HCl	mRNA	0	0	2	0	0	160	0.0875
XP_011240029.1	spleen,	HCl	mRNA	0	0	0	0	2	474	0.101266
XP_011240293.1	liver,kidney,	HCl	mRNA	0	0	4	3	0	1277	0.036805
XP_011240385.1	brain,	HCl	mRNA	6	0	0	0	0	254	0.275591
XP_011240781.1	brain,	HCl	mRNA	3	0	0	0	0	1366	0.0212299
XP_011241171.1	brain,	HCl	mRNA	2	0	0	0	0	2071	0.0173829
XP_011241304.1	heart,	HCl	mRNA	0	5	0	0	0	733	0.103683
XP_011241312.1	liver,kidney,	HCl	mRNA	0	0	5	6	0	711	0.0632911
XP_011241507.1	brain,kidney,	HCl	mRNA	4	0	2	0	0	1301	0.046887
XP_011241696.1	liver,brain,kidney,	HCl	mRNA	4	0	3	4	0	934	0.0717345
XP_011241953.1	liver,kidney,	HCl	mRNA	0	0	4	5	0	1355	0.0265683
XP_011242368.1	liver,brain,kidney,	HCl	mRNA	12	0	3	3	0	1796	0.0729399
XP_011242635.1	brain,kidney,	HCl	mRNA	3	0	5	0	0	1430	0.0202797
XP_011243799.1	spleen,	HCl	mRNA	0	0	0	0	4	470	0.161702
XP_011243842.1	brain,	HCl	mRNA	2	0	0	0	0	834	0.0407674
XP_011244387.1	brain,	HCl	mRNA	31	0	0	0	0	1455	0.162199
XP_011244566.1	liver,spleen,	HCl	mRNA	0	0	0	15	11	625	0.2544
XP_011244585.1	brain,	HCl	mRNA	57	0	0	0	0	1086	0.314917
XP_011244587.1	kidney,	HCl	mRNA	0	0	28	0	0	988	0.232794
XP_011244848.1	heart,	HCl	mRNA	0	47	0	0	0	1649	0.642207
XP_011245479.1	brain,	HCl	mRNA	12	0	0	0	0	1807	0.0902048
XP_011245801.1	brain,kidney,	HCl	mRNA	3	0	3	0	0	1242	0.0257649
XP_011246200.1	spleen,	HCl	mRNA	0	0	0	0	6	449	0.129176
XP_011246811.1	brain,	HCl	mRNA	3	0	0	0	0	200	0.165
XP_011248570.1	brain,	HCl	mRNA	3	0	0	0	0	1759	0.0193292
XP_011248933.1	liver,	HCl	mRNA	0	0	0	3	0	603	0.0182421
XP_011248998.1	brain,spleen,	HCl	mRNA	3	0	0	0	3	2512	0.0123408
XP_011249064.2	spleen,	HCl	mRNA	0	0	0	0	4	162	0.296296
XP_017167769.1	brain,	HCl	mRNA	12	0	0	0	0	365	0.383562
XP_017168184.1	spleen,	HCl	mRNA	0	0	0	0	17	645	0.246512
XP_017168228.1	brain,	HCl	mRNA	13	0	0	0	0	1399	0.152966
XP_017168360.1	brain,	HCl	mRNA	2	0	0	0	0	1212	0.0123762
XP_017168660.1	brain,	HCl	mRNA	31	0	0	0	0	996	0.38755
XP_017168664.1	brain,	HCl	mRNA	86	0	0	0	0	972	0.567901
XP_017169456.1	brain,	HCl	mRNA	3	0	0	0	0	433	0.0577367
XP_017169794.1	brain,kidney,	HCl	mRNA	5	0	2	0	0	1039	0.0654475
XP_017170102.1	spleen,	HCl	mRNA	0	0	0	0	5	286	0.122378
XP_017170110.1	kidney,heart,	HCl	mRNA	0	4	3	0	0	7730	0.00452781
XP_017170170.1	brain,	HCl	mRNA	27	0	0	0	0	1281	0.250585
XP_017171224.1	brain,	HCl	mRNA	4	0	0	0	0	937	0.0693703
XP_017171662.1	heart,	HCl	mRNA	0	2	0	0	0	196	0.173469
XP_017171843.1	kidney,	HCl	mRNA	0	0	5	0	0	1640	0.0286585
XP_017172328.1	brain,	HCl	mRNA	22	0	0	0	0	1414	0.151344
XP_017172717.1	brain,	HCl	mRNA	71	0	0	0	0	1403	0.299359
XP_017172726.1	spleen,	HCl	mRNA	0	0	0	0	14	841	0.16409
XP_017173108.1	brain,	HCl	mRNA	2	0	0	0	0	1644	0.0182482
XP_017173407.1	liver,brain,spleen,	HCl	mRNA	2	0	0	3	4	201	0.0696517
XP_017174691.1	brain,	HCl	mRNA	5	0	0	0	0	1874	0.0421558
XP_017174969.1	brain,	HCl	mRNA	5	0	0	0	0	1086	0.072744
XP_017174997.1	heart,	HCl	mRNA	0	2	0	0	0	151	0.178808
XP_017175184.1	liver,kidney,	HCl	mRNA	0	0	3	3	0	338	0.0887574
XP_017175241.1	liver,spleen,	HCl	mRNA	0	0	0	4	2	628	0.066879
XP_017175352.1	kidney,	HCl	mRNA	0	0	42	0	0	1873	0.249867
XP_017175608.1	brain,	HCl	mRNA	4	0	0	0	0	1810	0.0281768
XP_017176484.1	brain,	HCl	mRNA	5	0	0	0	0	1131	0.0238727
XP_017176485.1	kidney,	HCl	mRNA	0	0	2	0	0	1111	0.0324032
XP_017176874.1	spleen,	HCl	mRNA	0	0	0	0	5	367	0.144414
XP_017176909.1	spleen,	HCl	mRNA	0	0	0	0	3	456	0.0548246
XP_017177215.1	spleen,	HCl	mRNA	0	0	0	0	8	1640	0.0676829
XP_017177316.1	kidney,	HCl	mRNA	0	0	15	0	0	714	0.246499
XP_017177634.1	brain,spleen,kidney,	HCl	mRNA	5	0	2	0	4	752	0.0625
XP_017177874.1	liver,spleen,kidney,	HCl	mRNA	0	0	3	3	3	386	0.0984456
XP_017177894.1	kidney,	HCl	mRNA	0	0	6	0	0	2851	0.0280603
A0A075B5R2	spleen,	RIPA,	mRNA	0	0	0	0	3	120	0.166667
A0A075B5R4	spleen,	RIPA,	mRNA	0	0	0	0	2	117	0.0940171
A0A075B5T3	spleen,	RIPA,	mRNA	0	0	0	0	4	119	0.428571
A0A075B6A0	liver,brain,spleen,kidney,heart,	RIPA,	mRNA	3	6	15	10	65	476	0.0966387
A0A087WNT1	liver,brain,spleen,kidney,heart,	RIPA,	mRNA	6	7	5	4	5	134	0.440299
A0A087WP57	spleen,	RIPA,	mRNA	0	0	0	0	9	84	0.892857
A0A087WQS2	spleen,	RIPA,	mRNA	0	0	0	0	16	451	0.348115
A0A087WR50	kidney,	RIPA,	mRNA	0	0	36	0	0	2386	0.167645
A0A087WS96	brain,	RIPA,	mRNA	5	0	0	0	0	120	0.525
A0A087WSN6	spleen,	RIPA,	mRNA	0	0	0	0	58	2296	0.280052
A0A087WSU3	heart,	RIPA,	mRNA	0	2	0	0	0	61	0.344262
A0A0A0MQ68	liver,brain,spleen,kidney,heart,	RIPA,	mRNA	3	5	32	51	5	447	0.0782998
A0A0A0MQC3	liver,	RIPA,	mRNA	0	0	0	16	0	141	0.829787
A0A0A0MQF5	heart,	RIPA,	mRNA	0	2	0	0	0	325	0.0676923
A0A0A0MQN4	liver,spleen,	RIPA,	mRNA	0	0	0	9	10	741	0.107962
A0A0A6YVS2	spleen,	RIPA,	mRNA	0	0	0	0	5	200	0.115
A0A0A6YW77	kidney,	RIPA,	mRNA	0	0	2	0	0	271	0.0627306
A0A0A6YWR2	liver,spleen,kidney,heart,	RIPA,	mRNA	0	5	4	4	5	393	0.155216
A0A0A6YX26	heart,	RIPA,	mRNA	0	8	0	0	0	129	0.465116
A0A0A6YXV0	spleen,	RIPA,	mRNA	0	0	0	0	10	204	0.294118
A0A0A6YXW6	liver,	RIPA,	mRNA	0	0	0	2	0	389	0.113111
A0A0A6YYE7	spleen,	RIPA,	mRNA	0	0	0	0	2	117	0.25641
A0A0B4J1E6	spleen,	RIPA,	mRNA	0	0	0	0	2	340	0.0764706
A0A0B4J1G0	spleen,	RIPA,	mRNA	0	0	0	0	3	249	0.140562
A0A0B4J1H6	spleen,	RIPA,	mRNA	0	0	0	0	2	120	0.2
A0A0B4J1H7	spleen,kidney,	RIPA,	mRNA	0	0	3	0	5	120	0.283333
A0A0B4J1I1	spleen,	RIPA,	mRNA	0	0	0	0	2	116	0.232759
A0A0B4J1I9	spleen,	RIPA,	mRNA	0	0	0	0	2	117	0.273504
A0A0B4J1J2	spleen,	RIPA,	mRNA	0	0	0	0	2	115	0.234783
A0A0B4J1M6	spleen,	RIPA,	mRNA	0	0	0	0	2	267	0.11985
A0A0F6AIX5	spleen,	RIPA,	mRNA	0	0	0	0	3	326	0.168712
A0A0G2JE00	brain,	RIPA,	mRNA	15	0	0	0	0	1414	0.110325
A0A0G2JE99	spleen,	RIPA,	mRNA	0	0	0	0	5	106	0.5
A0A0G2JEA5	brain,kidney,	RIPA,	mRNA	3	0	2	0	0	862	0.0464037
A0A0G2JF28	spleen,	RIPA,	mRNA	0	0	0	0	5	120	0.3
A0A0G2JFP4	liver,kidney,	RIPA,	mRNA	0	0	4	3	0	592	0.0371622
A0A0G2JG26	spleen,	RIPA,	mRNA	0	0	0	0	2	315	0.0952381
A0A0G2JGL0	liver,brain,spleen,kidney,	RIPA,	mRNA	2	0	2	5	3	148	0.0675676
A0A0G2JGS4	spleen,kidney,heart,	RIPA,	mRNA	0	13	4	0	21	533	0.21576
A0A0G2JGW9	brain,spleen,	RIPA,	mRNA	31	0	0	0	43	643	0.452566
A0A0J9YQM4	brain,	RIPA,	mRNA	2	0	0	0	0	236	0.105932
A0A0J9YUD5	spleen,	RIPA,	mRNA	0	0	0	0	34	2061	0.163513
A0A0M3HEQ0	liver,brain,spleen,kidney,heart,	RIPA,	mRNA	21	18	18	23	12	527	0.373814
A0A0N4SUH4	spleen,	RIPA,	mRNA	0	0	0	0	10	648	0.128086
A0A0N4SVH3	spleen,	RIPA,	mRNA	0	0	0	0	5	300	0.166667
A0A0N4SVP8	liver,brain,spleen,heart,	RIPA,	mRNA	23	4	0	11	53	411	0.360097
A0A0N4SVU1	brain,	RIPA,	mRNA	8	0	0	0	0	1476	0.050813
A0A0R4IZW5	kidney,	RIPA,	mRNA	0	0	11	0	0	884	0.0871041
A0A0R4IZW7	spleen,	RIPA,	mRNA	0	0	0	0	5	663	0.0573152
A0A0R4IZW9	liver,brain,spleen,kidney,heart,	RIPA,	mRNA	3	4	4	5	3	219	0.278539
A0A0R4IZY0	liver,brain,spleen,kidney,heart,	RIPA,	mRNA	24	4	13	5	34	687	0.256186
A0A0R4IZY2	liver,	RIPA,	mRNA	0	0	0	51	0	500	0.598
A0A0R4IZY6	spleen,	RIPA,	mRNA	0	0	0	0	9	254	0.23622
A0A0R4IZZ1	brain,	RIPA,	mRNA	13	0	0	0	0	654	0.154434
A0A0R4J008	brain,spleen,kidney,	RIPA,	mRNA	6	0	2	0	20	488	0.0860656
A0A0R4J009	spleen,	RIPA,	mRNA	0	0	0	0	2	396	0.0631313
A0A0R4J032	liver,brain,spleen,kidney,heart,	RIPA,	mRNA	2	9	10	7	6	561	0.0213904
A0A0R4J049	liver,brain,kidney,	RIPA,	mRNA	5	0	2	2	0	637	0.0533752
A0A0R4J079	liver,brain,spleen,kidney,	RIPA,	mRNA	3	0	3	3	8	525	0.0457143
A0A0R4J081	liver,brain,spleen,kidney,heart,	RIPA,	mRNA	4	2	3	4	2	330	0.145455
A0A0R4J092	liver,brain,spleen,kidney,	RIPA,	mRNA	3	0	14	10	4	879	0.0386803
A0A0R4J098	liver,brain,spleen,kidney,	RIPA,	mRNA	6	0	6	4	2	580	0.0965517
A0A0R4J0A1	heart,	RIPA,	mRNA	0	7	0	0	0	478	0.0167364
A0A0R4J0A2	spleen,	RIPA,	mRNA	0	0	0	0	2	418	0.0909091
A0A0R4J0B2	liver,spleen,	RIPA,	mRNA	0	0	0	14	26	550	0.289091
A0A0R4J0B4	liver,brain,spleen,kidney,	RIPA,	mRNA	10	0	4	6	14	432	0.185185
A0A0R4J0B5	spleen,	RIPA,	mRNA	0	0	0	0	2	466	0.0772532
A0A0R4J0B6	spleen,	RIPA,	mRNA	0	0	0	0	5	657	0.0304414
A0A0R4J0C0	spleen,	RIPA,	mRNA	0	0	0	0	2	280	0.0857143
A0A0R4J0D3	spleen,	RIPA,	mRNA	0	0	0	0	10	823	0.106926
A0A0R4J0E4	spleen,	RIPA,	mRNA	0	0	0	0	4	966	0.0610766
A0A0R4J0F6	spleen,	RIPA,	mRNA	0	0	0	0	11	1305	0.0559387
A0A0R4J0G0	brain,spleen,kidney,	RIPA,	mRNA	5	0	8	0	35	667	0.0794603
A0A0R4J0G4	liver,spleen,	RIPA,	mRNA	0	0	0	2	7	648	0.0246914
A0A0R4J0I1	liver,kidney,heart,	RIPA,	mRNA	0	207	172	100	0	418	0.416268
A0A0R4J0I6	liver,kidney,	RIPA,	mRNA	0	0	7	32	0	779	0.0821566
A0A0R4J0I9	liver,brain,spleen,kidney,	RIPA,	mRNA	32	0	3	47	67	4545	0.0833883
A0A0R4J0J1	brain,	RIPA,	mRNA	6	0	0	0	0	553	0.0777577
A0A0R4J0J5	spleen,	RIPA,	mRNA	0	0	0	0	5	687	0.0538574
A0A0R4J0J6	spleen,	RIPA,	mRNA	0	0	0	0	7	683	0.103953
A0A0R4J0K1	liver,brain,spleen,kidney,heart,	RIPA,	mRNA	3	4	6	6	5	162	0.228395
A0A0R4J0K5	spleen,	RIPA,	mRNA	0	0	0	0	4	329	0.0820669
A0A0R4J0L6	liver,spleen,kidney,	RIPA,	mRNA	0	0	3	2	3	320	0.140625
A0A0R4J0N5	liver,	RIPA,	mRNA	0	0	0	2	0	343	0.102041
A0A0R4J0P1	liver,spleen,kidney,	RIPA,	mRNA	0	0	16	15	2	413	0.329298
A0A0R4J0P6	spleen,	RIPA,	mRNA	0	0	0	0	3	624	0.0608974
A0A0R4J0Q6	spleen,	RIPA,	mRNA	0	0	0	0	3	734	0.0422343
A0A0R4J0S1	brain,	RIPA,	mRNA	3	0	0	0	0	409	0.117359
A0A0R4J0S3	kidney,	RIPA,	mRNA	0	0	2	0	0	396	0.0984848
A0A0R4J0T0	liver,spleen,kidney,	RIPA,	mRNA	0	0	13	2	3	234	0.470085
A0A0R4J0U7	spleen,	RIPA,	mRNA	0	0	0	0	4	224	0.232143
A0A0R4J0W6	liver,spleen,	RIPA,	mRNA	0	0	0	3	12	602	0.0265781
A0A0R4J0W9	spleen,	RIPA,	mRNA	0	0	0	0	6	721	0.0915395
A0A0R4J131	liver,kidney,	RIPA,	mRNA	0	0	3	5	0	529	0.109641
A0A0R4J137	liver,kidney,heart,	RIPA,	mRNA	0	4	16	11	0	311	0.237942
A0A0R4J174	liver,	RIPA,	mRNA	0	0	0	3	0	435	0.0666667
A0A0R4J187	spleen,	RIPA,	mRNA	0	0	0	0	6	608	0.136513
A0A0R4J194	brain,	RIPA,	mRNA	8	0	0	0	0	677	0.132939
A0A0R4J1C5	brain,kidney,	RIPA,	mRNA	2	0	2	0	0	298	0.0771812
A0A0R4J1C8	spleen,	RIPA,	mRNA	0	0	0	0	6	335	0.0865672
A0A0R4J1N0	brain,	RIPA,	mRNA	88	0	0	0	0	593	0.706577
A0A0R4J1N4	heart,	RIPA,	mRNA	0	11	0	0	0	408	0.0931373
A0A0R4J1Q7	liver,spleen,	RIPA,	mRNA	0	0	0	3	2	906	0.0364238
A0A0R4J1W7	spleen,	RIPA,	mRNA	0	0	0	0	3	597	0.0552764
A0A0R4J1Y3	kidney,	RIPA,	mRNA	0	0	3	0	0	335	0.104478
A0A0R4J1Z2	spleen,	RIPA,	mRNA	0	0	0	0	2	259	0.111969
A0A0R4J203	kidney,heart,	RIPA,	mRNA	0	4	49	0	0	345	0.101449
A0A0R4J206	liver,brain,kidney,heart,	RIPA,	mRNA	2	2	8	12	0	189	0.0687831
A0A0R4J254	spleen,	RIPA,	mRNA	0	0	0	0	3	1151	0.0225891
A0A0R4J275	liver,brain,spleen,kidney,heart,	RIPA,	mRNA	12	23	18	10	3	149	0.483221
A0A0R4J293	liver,spleen,kidney,	RIPA,	mRNA	0	0	6	2	20	815	0.0478528
A0A0R4J2B2	brain,spleen,kidney,heart,	RIPA,	mRNA	22	2	14	0	43	327	0.422018
A0A0R4J2C2	brain,	RIPA,	mRNA	8	0	0	0	0	422	0.118483
A0A0U1RNF2	brain,spleen,	RIPA,	mRNA	5	0	0	0	3	332	0.168675
A0A0U1RQ37	spleen,	RIPA,	mRNA	0	0	0	0	3	226	0.123894
A0A0U1RQ96	spleen,	RIPA,	mRNA	0	0	0	0	90	195	0.902564
A0A0X1KG62	spleen,	RIPA,	mRNA	0	0	0	0	4	631	0.0935024
A0A0X1KG67	liver,brain,kidney,heart,	RIPA,	mRNA	3	2	3	2	0	268	0.160448
A0A140LHG8	spleen,	RIPA,	mRNA	0	0	0	0	19	260	0.473077
A0A140LIF8	spleen,	RIPA,	mRNA	0	0	0	0	9	407	0.108108
A0A140LIV1	spleen,	RIPA,	mRNA	0	0	0	0	2	2076	0.00289017
A0A140LJ04	spleen,	RIPA,	mRNA	0	0	0	0	6	2953	0.0250593
A0A140LJ36	spleen,	RIPA,	mRNA	0	0	0	0	2	292	0.0958904
A0A140T8T4	brain,spleen,kidney,heart,	RIPA,	mRNA	3	4	13	0	21	192	0.265625
A0A140T8V5	kidney,	RIPA,	mRNA	0	0	2	0	0	261	0.0766284
A0A1B0GRA5	liver,	RIPA,	mRNA	0	0	0	2	0	793	0.0290038
A0A1B0GRD0	spleen,	RIPA,	mRNA	0	0	0	0	2	205	0.156098
A0A1B0GS59	spleen,	RIPA,	mRNA	0	0	0	0	11	1408	0.0930398
A0A1B0GS68	liver,brain,spleen,kidney,heart,	RIPA,	mRNA	3	3	12	11	23	446	0.0560538
A0A1B0GSD0	liver,	RIPA,	mRNA	0	0	0	14	0	153	0.457516
A0A1B0GSG5	liver,brain,spleen,kidney,heart,	RIPA,	mRNA	4	3	27	32	56	492	0.0914634
A0A1B0GSH8	liver,	RIPA,	mRNA	0	0	0	12	0	263	0.330798
A0A1B0GSU0	liver,spleen,kidney,	RIPA,	mRNA	0	0	5	16	28	802	0.0610973
A0A1D5RLD8	liver,brain,spleen,kidney,heart,	RIPA,	mRNA	173	150	172	177	147	333	0.891892
A0A1D5RLG3	spleen,	RIPA,	mRNA	0	0	0	0	3	988	0.0445344
A0A1D5RLL3	spleen,	RIPA,	mRNA	0	0	0	0	12	846	0.122931
A0A1D5RLR7	spleen,	RIPA,	mRNA	0	0	0	0	2	650	0.0138462
A0A1D5RLS0	liver,	RIPA,	mRNA	0	0	0	2	0	213	0.211268
A0A1D5RM85	brain,spleen,kidney,	RIPA,	mRNA	7	0	7	0	22	219	0.210046
A0A1D5RMI4	brain,	RIPA,	mRNA	7	0	0	0	0	964	0.0643154
A0A1D5RML8	brain,kidney,heart,	RIPA,	mRNA	3	2	4	0	0	439	0.118451
A0A1L1SQ41	liver,spleen,	RIPA,	mRNA	0	0	0	2	4	559	0.0214669
A0A1L1SSF2	spleen,	RIPA,	mRNA	0	0	0	0	12	496	0.320565
A0A1L1SSH9	brain,spleen,kidney,heart,	RIPA,	mRNA	6	3	2	0	4	332	0.192771
A0A1L1SV46	brain,	RIPA,	mRNA	3	0	0	0	0	478	0.0627615
A0A1L1SV73	liver,	RIPA,	mRNA	0	0	0	8	0	1376	0.0719477
A0A1L1SV77	spleen,kidney,heart,	RIPA,	mRNA	0	4	2	0	2	312	0.0673077
A0A1W2P7S8	liver,	RIPA,	mRNA	0	0	0	4	0	802	0.0523691
A0A1W2P7Y8	brain,	RIPA,	mRNA	2	0	0	0	0	200	0.095
A0A1Y7VJA7	spleen,	RIPA,	mRNA	0	0	0	0	2	265	0.0377358
A0A1Y7VJM4	liver,spleen,	RIPA,	mRNA	0	0	0	4	3	485	0.0701031
A0A1Y7VJN6	spleen,kidney,heart,	RIPA,	mRNA	0	5	3	0	6	399	0.137845
A0A1Y7VJT0	brain,	RIPA,	mRNA	2	0	0	0	0	263	0.0456274
A0A1Y7VJW9	spleen,heart,	RIPA,	mRNA	0	3	0	0	12	461	0.0954447
A0A1Y7VP24	liver,brain,spleen,	RIPA,	mRNA	2	0	0	2	7	259	0.0656371
A0JNU3	liver,	RIPA,	mRNA	0	0	0	10	0	564	0.143617
A0PJK7	kidney,	RIPA,	mRNA	0	0	8	0	0	831	0.0950662
A1IGU4	spleen,	RIPA,	mRNA	0	0	0	0	3	676	0.0325444
A2A432	liver,spleen,	RIPA,	mRNA	0	0	0	4	13	970	0.0340206
A2A4P0	spleen,	RIPA,	mRNA	0	0	0	0	7	1244	0.0659164
A2A4P4	brain,spleen,kidney,heart,	RIPA,	mRNA	16	3	13	0	13	543	0.276243
A2A517	spleen,	RIPA,	mRNA	0	0	0	0	3	460	0.0804348
A2A5S3	liver,spleen,	RIPA,	mRNA	0	0	0	11	4	495	0.220202
A2A7Q5	spleen,kidney,heart,	RIPA,	mRNA	0	2	2	0	3	748	0.026738
A2A7S7	liver,brain,spleen,kidney,heart,	RIPA,	mRNA	20	6	17	26	30	564	0.257092
A2A7Z6	liver,	RIPA,	mRNA	0	0	0	3	0	228	0.109649
A2A974	liver,	RIPA,	mRNA	0	0	0	17	0	508	0.179134
A2A9V9	brain,	RIPA,	mRNA	2	0	0	0	0	338	0.0887574
A2AA35	kidney,	RIPA,	mRNA	0	0	2	0	0	130	0.353846
A2AB59-2	spleen,	RIPA,	mRNA	0	0	0	0	5	670	0.0656716
A2ABV5	spleen,	RIPA,	mRNA	0	0	0	0	2	1459	0.0267306
A2ACM0	liver,spleen,	RIPA,	mRNA	0	0	0	2	4	1335	0.0142322
A2AEE7	brain,	RIPA,	mRNA	4	0	0	0	0	2919	0.0133607
A2AFF6	spleen,	RIPA,	mRNA	0	0	0	0	17	1268	0.144322
A2AGH6	spleen,	RIPA,	mRNA	0	0	0	0	3	2190	0.0141553
A2AGI2	brain,	RIPA,	mRNA	7	0	0	0	0	845	0.0887574
A2AH25	brain,spleen,kidney,	RIPA,	mRNA	18	0	13	0	27	479	0.283925
A2AH85	liver,brain,spleen,kidney,	RIPA,	mRNA	13	0	29	20	56	972	0.122428
A2AJQ0	brain,spleen,heart,	RIPA,	mRNA	6	2	0	0	2	597	0.137353
A2AKD7	brain,heart,	RIPA,	mRNA	7	6	0	0	0	499	0.0901804
A2AKG8	spleen,	RIPA,	mRNA	0	0	0	0	8	1798	0.0528365
A2AKN8	kidney,	RIPA,	mRNA	0	0	99	0	0	180	0.783333
A2AKU9	heart,	RIPA,	mRNA	0	46	0	0	0	297	0.356902
A2AKV6	liver,kidney,	RIPA,	mRNA	0	0	2	4	0	287	0.0766551
A2AKW0	spleen,	RIPA,	mRNA	0	0	0	0	8	315	0.196825
A2AL36	spleen,	RIPA,	mRNA	0	0	0	0	3	2334	0.0218509
A2AL50	spleen,kidney,	RIPA,	mRNA	0	0	30	0	14	671	0.375559
A2ALS4	brain,	RIPA,	mRNA	12	0	0	0	0	729	0.197531
A2ANY6	spleen,	RIPA,	mRNA	0	0	0	0	14	5589	0.0280909
A2APM2	spleen,	RIPA,	mRNA	0	0	0	0	6	780	0.0269231
A2APY7	brain,kidney,heart,	RIPA,	mRNA	4	2	3	0	0	343	0.139942
A2AQ07	brain,spleen,kidney,	RIPA,	mRNA	81	0	41	0	126	451	0.117517
A2AQ19	spleen,	RIPA,	mRNA	0	0	0	0	2	715	0.0335664
A2AQ43	spleen,	RIPA,	mRNA	0	0	0	0	18	554	0.337545
A2AQJ8	liver,spleen,kidney,	RIPA,	mRNA	0	0	2	2	11	913	0.0306681
A2AQR0	kidney,heart,	RIPA,	mRNA	0	4	30	0	0	745	0.0805369
A2ARD6	liver,spleen,	RIPA,	mRNA	0	0	0	30	4	465	0.372043
A2AS03	spleen,	RIPA,	mRNA	0	0	0	0	15	2970	0.0653199
A2AS89	liver,	RIPA,	mRNA	0	0	0	35	0	358	0.670391
A2AS98	spleen,	RIPA,	mRNA	0	0	0	0	9	1134	0.0767196
A2ASS6	heart,	RIPA,	mRNA	0	1002	0	0	0	35213	0.168375
A2ASS6-3	heart,	RIPA,	mRNA	0	177	0	0	0	5508	0.146514
A2AT02	liver,	RIPA,	mRNA	0	0	0	21	0	339	0.507375
A2ATU0	liver,kidney,	RIPA,	mRNA	0	0	52	85	0	921	0.34202
A2AV72	liver,	RIPA,	mRNA	0	0	0	14	0	179	0.201117
A2AW86	spleen,	RIPA,	mRNA	0	0	0	0	3	1723	0.0174115
A2AWA9	spleen,	RIPA,	mRNA	0	0	0	0	5	1064	0.049812
A2AWN8	brain,	RIPA,	mRNA	4	0	0	0	0	586	0.056314
A2AX52	spleen,	RIPA,	mRNA	0	0	0	0	10	2309	0.0610654
A2BDX3	liver,brain,spleen,kidney,	RIPA,	mRNA	2	0	2	4	5	460	0.0195652
A2BE28	spleen,	RIPA,	mRNA	0	0	0	0	2	776	0.0219072
A2CG35	brain,heart,	RIPA,	mRNA	9	5	0	0	0	291	0.0687285
A2RT67	spleen,	RIPA,	mRNA	0	0	0	0	2	1274	0.0156986
A3KFX0	brain,heart,	RIPA,	mRNA	2	2	0	0	0	365	0.0794521
A3KGJ7	spleen,	RIPA,	mRNA	0	0	0	0	5	2435	0.0316222
A3KMP2	liver,spleen,kidney,	RIPA,	mRNA	0	0	6	6	8	465	0.111828
A4Q9E8	spleen,	RIPA,	mRNA	0	0	0	0	2	822	0.00729927
A4QPD3	spleen,	RIPA,	mRNA	0	0	0	0	17	588	0.129252
A6H5Y3	spleen,	RIPA,	mRNA	0	0	0	0	5	1253	0.0598563
A6H630	spleen,	RIPA,	mRNA	0	0	0	0	3	439	0.070615
A6H6E2	kidney,heart,	RIPA,	mRNA	0	6	13	0	0	943	0.0593849
A6X919	spleen,	RIPA,	mRNA	0	0	0	0	2	746	0.0348525
A6X935	liver,spleen,kidney,heart,	RIPA,	mRNA	0	19	27	26	14	942	0.150743
A6ZI46	spleen,kidney,	RIPA,	mRNA	0	0	65	0	66	419	0.491647
A7MCT6	liver,	RIPA,	mRNA	0	0	0	3	0	385	0.0467532
A7RDN6	heart,	RIPA,	mRNA	0	2	0	0	0	342	0.0672515
A8C756	spleen,	RIPA,	mRNA	0	0	0	0	2	1938	0.0103199
A8DIL0	spleen,	RIPA,	mRNA	0	0	0	0	2	325	0.0615385
B0F2B4	brain,	RIPA,	mRNA	5	0	0	0	0	945	0.0433862
B1AQ77	heart,	RIPA,	mRNA	0	42	0	0	0	456	0.140351
B1AQD9	brain,	RIPA,	mRNA	4	0	0	0	0	262	0.103053
B1AQZ0	brain,spleen,kidney,heart,	RIPA,	mRNA	50	8	10	0	22	484	0.477273
B1AQZ2	brain,	RIPA,	mRNA	10	0	0	0	0	725	0.150345
B1AR69	heart,	RIPA,	mRNA	0	239	0	0	0	1938	0.146027
B1ARB3	spleen,	RIPA,	mRNA	0	0	0	0	6	732	0.106557
B1ARJ9	spleen,	RIPA,	mRNA	0	0	0	0	3	288	0.0520833
B1ART2	spleen,	RIPA,	mRNA	0	0	0	0	2	4390	0.00615034
B1ARU1	spleen,	RIPA,	mRNA	0	0	0	0	51	5895	0.0910941
B1ASP2	spleen,	RIPA,	mRNA	0	0	0	0	15	1153	0.140503
B1AT82	brain,spleen,	RIPA,	mRNA	4	0	0	0	12	385	0.122078
B1ATI0	liver,spleen,kidney,	RIPA,	mRNA	0	0	4	23	13	532	0.0977444
B1AUN2	liver,spleen,kidney,	RIPA,	mRNA	0	0	3	3	5	452	0.0442478
B1AV75	spleen,	RIPA,	mRNA	0	0	0	0	3	210	0.0714286
B1AVZ0	spleen,	RIPA,	mRNA	0	0	0	0	5	310	0.232258
B1AWD9	brain,spleen,heart,	RIPA,	mRNA	20	5	0	0	5	248	0.233871
B1AWT3	liver,brain,	RIPA,	mRNA	3	0	0	2	0	454	0.0198238
B1B0C7	spleen,	RIPA,	mRNA	0	0	0	0	94	4375	0.210971
B2C3G8	spleen,	RIPA,	mRNA	0	0	0	0	14	797	0.178168
B2KGF0	liver,brain,spleen,kidney,heart,	RIPA,	mRNA	2	2	6	4	8	235	0.110638
B2M1R6	liver,brain,kidney,heart,	RIPA,	mRNA	134	83	127	117	0	440	0.622727
B2RPV6	spleen,	RIPA,	mRNA	0	0	0	0	22	1210	0.200826
B2RR03	spleen,	RIPA,	mRNA	0	0	0	0	5	214	0.214953
B2RS76	heart,	RIPA,	mRNA	0	2	0	0	0	415	0.0457831
B2RSH2	brain,	RIPA,	mRNA	7	0	0	0	0	354	0.0932203
B2RT14	liver,	RIPA,	mRNA	0	0	0	14	0	529	0.153119
B2RUJ5	brain,	RIPA,	mRNA	4	0	0	0	0	842	0.0368171
B2RUP2	spleen,	RIPA,	mRNA	0	0	0	0	8	1085	0.0764977
B2RVL6	liver,	RIPA,	mRNA	0	0	0	2	0	241	0.0954357
B2RWS6	spleen,	RIPA,	mRNA	0	0	0	0	3	2412	0.011194
B2RX12	spleen,	RIPA,	mRNA	0	0	0	0	9	1523	0.0741957
B2RXC1	spleen,	RIPA,	mRNA	0	0	0	0	5	1133	0.043248
B2RY04	spleen,	RIPA,	mRNA	0	0	0	0	9	1868	0.0556745
B5THE2	heart,	RIPA,	mRNA	0	4	0	0	0	1827	0.0229885
B5X0G2	liver,	RIPA,	mRNA	0	0	0	227	0	180	0.766667
B6CI26	spleen,	RIPA,	mRNA	0	0	0	0	2	305	0.0557377
B7ZC40	kidney,	RIPA,	mRNA	0	0	3	0	0	170	0.305882
B7ZCF1	brain,	RIPA,	mRNA	42	0	0	0	0	451	0.476718
B7ZMP1	liver,brain,kidney,	RIPA,	mRNA	3	0	6	4	0	506	0.055336
B7ZN28	kidney,heart,	RIPA,	mRNA	0	8	3	0	0	1302	0.077573
B7ZNH7	spleen,	RIPA,	mRNA	0	0	0	0	113	1794	0.369008
B7ZNL8	spleen,	RIPA,	mRNA	0	0	0	0	5	666	0.124625
B7ZNU9	spleen,kidney,	RIPA,	mRNA	0	0	4	0	13	531	0.0357815
B8JI96	liver,	RIPA,	mRNA	0	0	0	176	0	150	0.933333
B8JJC1	spleen,	RIPA,	mRNA	0	0	0	0	3	609	0.047619
B8JJN0	liver,brain,spleen,kidney,heart,	RIPA,	mRNA	3	23	31	18	10	1276	0.0289969
B8JK39	spleen,	RIPA,	mRNA	0	0	0	0	5	1036	0.0762548
B8QI36	brain,	RIPA,	mRNA	6	0	0	0	0	1187	0.0252738
B9EI38	brain,	RIPA,	mRNA	3	0	0	0	0	648	0.0354938
B9EJA2	brain,	RIPA,	mRNA	3	0	0	0	0	1648	0.0230583
B9EJR8	spleen,	RIPA,	mRNA	0	0	0	0	3	853	0.0445487
C0HKG5	liver,	RIPA,	mRNA	0	0	0	2	0	259	0.0965251
D3YTP3	brain,	RIPA,	mRNA	6	0	0	0	0	312	0.0384615
D3YTS1	liver,spleen,	RIPA,	mRNA	0	0	0	4	8	247	0.190283
D3YUJ1	brain,spleen,	RIPA,	mRNA	2	0	0	0	2	206	0.0825243
D3YUP0	spleen,	RIPA,	mRNA	0	0	0	0	2	1429	0.013296
D3YUP1	spleen,	RIPA,	mRNA	0	0	0	0	5	651	0.0660522
D3YUV1	brain,spleen,	RIPA,	mRNA	6	0	0	0	8	543	0.0773481
D3YUV9	brain,	RIPA,	mRNA	3	0	0	0	0	259	0.173745
D3YUZ8	brain,	RIPA,	mRNA	47	0	0	0	0	755	0.429139
D3YVL0	liver,spleen,kidney,	RIPA,	mRNA	0	0	2	14	2	1077	0.0167131
D3YVS1	heart,	RIPA,	mRNA	0	3	0	0	0	436	0.0756881
D3YVW2	liver,	RIPA,	mRNA	0	0	0	6	0	683	0.045388
D3YWB9	brain,	RIPA,	mRNA	3	0	0	0	0	1310	0.0221374
D3YWN7	liver,	RIPA,	mRNA	0	0	0	6	0	738	0.0745257
D3YXJ5	kidney,	RIPA,	mRNA	0	0	3	0	0	310	0.167742
D3YY09	spleen,	RIPA,	mRNA	0	0	0	0	2	212	0.103774
D3YYD0	spleen,	RIPA,	mRNA	0	0	0	0	2	538	0.0390335
D3YYI8	liver,	RIPA,	mRNA	0	0	0	3	0	482	0.0643154
D3YYS6	liver,brain,spleen,heart,	RIPA,	mRNA	5	4	0	10	7	331	0.114804
D3YYT1	spleen,	RIPA,	mRNA	0	0	0	0	20	552	0.251812
D3YZZ3	liver,	RIPA,	mRNA	0	0	0	3	0	342	0.114035
D3YZZ4	brain,	RIPA,	mRNA	2	0	0	0	0	168	0.166667
D3YZZ5	liver,brain,spleen,kidney,	RIPA,	mRNA	5	0	6	7	6	224	0.205357
D3Z067	brain,spleen,kidney,	RIPA,	mRNA	3	0	2	0	2	194	0.0876289
D3Z0M6	brain,	RIPA,	mRNA	17	0	0	0	0	645	0.317829
D3Z0M9	brain,spleen,kidney,	RIPA,	mRNA	3	0	4	0	16	819	0.046398
D3Z286	spleen,	RIPA,	mRNA	0	0	0	0	2	447	0.105145
D3Z2X5	brain,	RIPA,	mRNA	13	0	0	0	0	143	0.370629
D3Z312	spleen,	RIPA,	mRNA	0	0	0	0	6	212	0.245283
D3Z3C1	brain,	RIPA,	mRNA	4	0	0	0	0	201	0.179104
D3Z3G6	brain,	RIPA,	mRNA	25	0	0	0	0	380	0.373684
D3Z4S3	brain,spleen,	RIPA,	mRNA	3	0	0	0	2	140	0.221429
D3Z5F7	liver,brain,kidney,	RIPA,	mRNA	5	0	8	5	0	333	0.156156
D3Z5G7	liver,	RIPA,	mRNA	0	0	0	28	0	567	0.188713
D3Z627	spleen,	RIPA,	mRNA	0	0	0	0	29	1201	0.215654
D3Z6G3	brain,	RIPA,	mRNA	18	0	0	0	0	266	0.353383
D3Z6I8	brain,	RIPA,	mRNA	124	0	0	0	0	247	0.696356
D3Z722	brain,	RIPA,	mRNA	11	0	0	0	0	212	0.198113
D3Z7I0	spleen,	RIPA,	mRNA	0	0	0	0	3	950	0.0442105
D3Z7M5	liver,brain,	RIPA,	mRNA	3	0	0	8	0	181	0.176796
D3Z7P0	spleen,	RIPA,	mRNA	0	0	0	0	2	385	0.0727273
D3Z7P3	brain,spleen,kidney,	RIPA,	mRNA	32	0	17	0	20	674	0.384273
D3Z7P3-2	spleen,kidney,	RIPA,	mRNA	0	0	11	0	20	603	0.222222
D3Z7Q5	liver,kidney,	RIPA,	mRNA	0	0	2	2	0	205	0.121951
D3Z7X0	kidney,heart,	RIPA,	mRNA	0	25	50	0	0	555	0.255856
D6REG4	liver,kidney,heart,	RIPA,	mRNA	0	20	45	58	0	197	0.649746
D6RFQ2	spleen,	RIPA,	mRNA	0	0	0	0	2	366	0.0655738
E0CXB9	brain,	RIPA,	mRNA	6	0	0	0	0	966	0.0931677
E0CXT7	liver,spleen,	RIPA,	mRNA	0	0	0	2	5	269	0.107807
E0CYH0	spleen,	RIPA,	mRNA	0	0	0	0	4	396	0.0606061
E0CZ72	brain,	RIPA,	mRNA	14	0	0	0	0	743	0.139973
E9PU96	spleen,	RIPA,	mRNA	0	0	0	0	6	2277	0.0408432
E9PUL7	liver,	RIPA,	mRNA	0	0	0	6	0	232	0.176724
E9PUQ7	spleen,	RIPA,	mRNA	0	0	0	0	2	613	0.0489396
E9PUU4	spleen,	RIPA,	mRNA	0	0	0	0	4	1503	0.0246174
E9PUY1	kidney,	RIPA,	mRNA	0	0	3	0	0	125	0.32
E9PUZ0	spleen,	RIPA,	mRNA	0	0	0	0	3	337	0.041543
E9PV38	liver,spleen,	RIPA,	mRNA	0	0	0	24	14	560	0.342857
E9PVM3	spleen,	RIPA,	mRNA	0	0	0	0	2	941	0.0361318
E9PVP0	liver,spleen,kidney,heart,	RIPA,	mRNA	0	2	9	28	2	364	0.0549451
E9PVV1	spleen,	RIPA,	mRNA	0	0	0	0	2	650	0.0292308
E9PW66	liver,brain,spleen,kidney,heart,	RIPA,	mRNA	26	14	17	11	28	418	0.279904
E9PWB2	spleen,	RIPA,	mRNA	0	0	0	0	5	374	0.120321
E9PWD2	brain,	RIPA,	mRNA	3	0	0	0	0	1646	0.027339
E9PWE8	liver,brain,spleen,kidney,heart,	RIPA,	mRNA	141	44	23	2	44	683	0.614934
E9PWG6	spleen,	RIPA,	mRNA	0	0	0	0	12	1004	0.0707171
E9PWQ3	liver,spleen,kidney,heart,	RIPA,	mRNA	0	103	53	4	142	3284	0.169001
E9PX59	spleen,	RIPA,	mRNA	0	0	0	0	8	1579	0.0747308
E9PXC0	liver,	RIPA,	mRNA	0	0	0	2	0	504	0.0257937
E9PXY8	liver,brain,spleen,kidney,	RIPA,	mRNA	3	0	8	7	34	1143	0.0192476
E9PY16	brain,	RIPA,	mRNA	13	0	0	0	0	374	0.368984
E9PY58	liver,kidney,	RIPA,	mRNA	0	0	2	5	0	707	0.039604
E9PYG5	spleen,	RIPA,	mRNA	0	0	0	0	7	384	0.195312
E9PYG6	spleen,	RIPA,	mRNA	0	0	0	0	4	1038	0.0279383
E9PYK0	spleen,	RIPA,	mRNA	0	0	0	0	8	619	0.172859
E9PYK3	liver,	RIPA,	mRNA	0	0	0	2	0	1969	0.0162519
E9PYN1	brain,	RIPA,	mRNA	9	0	0	0	0	474	0.130802
E9PZ16	heart,	RIPA,	mRNA	0	138	0	0	0	4383	0.244353
E9PZ26	spleen,	RIPA,	mRNA	0	0	0	0	2	1189	0.00756939
E9PZ91	liver,brain,kidney,heart,	RIPA,	mRNA	14	3	15	6	0	213	0.521127
E9PZD8	liver,brain,spleen,kidney,heart,	RIPA,	mRNA	16	41	46	31	43	1086	0.133517
E9PZJ2	spleen,	RIPA,	mRNA	0	0	0	0	2	465	0.0473118
E9PZJ8	spleen,	RIPA,	mRNA	0	0	0	0	4	2198	0.022293
E9PZM4	spleen,	RIPA,	mRNA	0	0	0	0	3	1827	0.0164204
E9PZS5	brain,spleen,heart,	RIPA,	mRNA	10	2	0	0	3	392	0.232143
E9PZY8	spleen,	RIPA,	mRNA	0	0	0	0	4	1861	0.0225685
E9Q0B5	liver,brain,spleen,kidney,heart,	RIPA,	mRNA	3	4	3	2	3	2583	0.00348432
E9Q0H6	spleen,	RIPA,	mRNA	0	0	0	0	2	188	0.154255
E9Q0V4	heart,	RIPA,	mRNA	0	2	0	0	0	167	0.0958084
E9Q0Y4	spleen,	RIPA,	mRNA	0	0	0	0	28	1038	0.235067
E9Q156	spleen,	RIPA,	mRNA	0	0	0	0	2	456	0.0416667
E9Q1T1	brain,	RIPA,	mRNA	51	0	0	0	0	533	0.377111
E9Q1W7	spleen,	RIPA,	mRNA	0	0	0	0	2	893	0.0548712
E9Q1Z6	spleen,	RIPA,	mRNA	0	0	0	0	7	680	0.0794118
E9Q236	spleen,	RIPA,	mRNA	0	0	0	0	2	1325	0.0143396
E9Q2S9	brain,	RIPA,	mRNA	2	0	0	0	0	222	0.0720721
E9Q2W8	brain,spleen,	RIPA,	mRNA	6	0	0	0	3	196	0.25
E9Q317	liver,brain,spleen,	RIPA,	mRNA	2	0	0	3	6	172	0.110465
E9Q368	spleen,	RIPA,	mRNA	0	0	0	0	2	1579	0.0196327
E9Q3L2	spleen,	RIPA,	mRNA	0	0	0	0	20	2105	0.105938
E9Q3X0	liver,brain,spleen,kidney,heart,	RIPA,	mRNA	8	24	31	56	47	870	0.150575
E9Q414	liver,spleen,	RIPA,	mRNA	0	0	0	20	2	4505	0.0501665
E9Q448	spleen,kidney,	RIPA,	mRNA	0	0	86	0	105	284	0.711268
E9Q450	kidney,	RIPA,	mRNA	0	0	91	0	0	284	0.658451
E9Q456	brain,	RIPA,	mRNA	90	0	0	0	0	248	0.673387
E9Q4M2	spleen,	RIPA,	mRNA	0	0	0	0	8	1072	0.0951493
E9Q4M4	brain,	RIPA,	mRNA	17	0	0	0	0	245	0.510204
E9Q4P1	kidney,	RIPA,	mRNA	0	0	2	0	0	410	0.0268293
E9Q4Q2	brain,	RIPA,	mRNA	21	0	0	0	0	548	0.286496
E9Q5L3	spleen,	RIPA,	mRNA	0	0	0	0	3	465	0.0752688
E9Q696	spleen,	RIPA,	mRNA	0	0	0	0	21	520	0.317308
E9Q6A6	heart,	RIPA,	mRNA	0	2	0	0	0	2265	0.0128035
E9Q6D8	liver,spleen,kidney,heart,	RIPA,	mRNA	0	3	3	9	2	931	0.0418904
E9Q6T9	brain,	RIPA,	mRNA	2	0	0	0	0	861	0.0371661
E9Q7L0	liver,spleen,kidney,	RIPA,	mRNA	0	0	31	18	24	1029	0.0952381
E9Q7P9	kidney,	RIPA,	mRNA	0	0	6	0	0	1308	0.0603976
E9Q7X7	brain,	RIPA,	mRNA	4	0	0	0	0	1710	0.0263158
E9Q800	heart,	RIPA,	mRNA	0	82	0	0	0	679	0.519882
E9Q8B5	liver,kidney,	RIPA,	mRNA	0	0	3	5	0	879	0.0352673
E9Q8I0	liver,brain,spleen,kidney,heart,	RIPA,	mRNA	8	24	33	32	21	1252	0.0567093
E9Q8V6	spleen,	RIPA,	mRNA	0	0	0	0	2	1869	0.0214018
E9Q9L6	spleen,	RIPA,	mRNA	0	0	0	0	3	2750	0.0112727
E9Q9M1	liver,brain,spleen,	RIPA,	mRNA	3	0	0	5	19	586	0.0426621
E9Q9P8	liver,	RIPA,	mRNA	0	0	0	20	0	317	0.337539
E9QA15	spleen,	RIPA,	mRNA	0	0	0	0	129	768	0.382812
E9QAE3	spleen,	RIPA,	mRNA	0	0	0	0	7	1848	0.0340909
E9QAQ5	brain,spleen,	RIPA,	mRNA	5	0	0	0	4	433	0.127021
E9QAZ2	liver,brain,spleen,kidney,heart,	RIPA,	mRNA	3	2	11	13	24	204	0.181373
E9QJS1	spleen,	RIPA,	mRNA	0	0	0	0	2	1207	0.0157415
E9QJS7	spleen,kidney,	RIPA,	mRNA	0	0	2	0	9	818	0.0220049
E9QJV4	spleen,	RIPA,	mRNA	0	0	0	0	2	665	0.0451128
E9QJW0	liver,brain,spleen,	RIPA,	mRNA	2	0	0	36	7	229	0.144105
E9QK04	brain,	RIPA,	mRNA	15	0	0	0	0	1492	0.125335
E9QK48	liver,spleen,kidney,	RIPA,	mRNA	0	0	4	2	13	841	0.0630202
E9QK83	spleen,	RIPA,	mRNA	0	0	0	0	7	2789	0.0233058
E9QKC6	brain,	RIPA,	mRNA	40	0	0	0	0	770	0.435065
E9QKE4	spleen,	RIPA,	mRNA	0	0	0	0	6	1387	0.0418169
E9QKR0	liver,brain,spleen,kidney,heart,	RIPA,	mRNA	37	2	13	7	26	382	0.397906
E9QL22	brain,spleen,heart,	RIPA,	mRNA	3	6	0	0	3	294	0.0408163
E9QLB2	liver,kidney,	RIPA,	mRNA	0	0	11	6	0	239	0.443515
E9QLQ7	spleen,	RIPA,	mRNA	0	0	0	0	2	204	0.137255
E9QMK2	brain,	RIPA,	mRNA	63	0	0	0	0	1615	0.150464
E9QMK9	liver,brain,spleen,kidney,heart,	RIPA,	mRNA	2	18	37	18	7	647	0.0741886
E9QN12	spleen,	RIPA,	mRNA	0	0	0	0	6	1103	0.0516772
E9QN37	spleen,	RIPA,	mRNA	0	0	0	0	13	720	0.206944
E9QN39	spleen,	RIPA,	mRNA	0	0	0	0	3	266	0.12406
E9QN59	liver,brain,kidney,	RIPA,	mRNA	9	0	5	2	0	494	0.0748988
E9QN92	spleen,	RIPA,	mRNA	0	0	0	0	4	526	0.0760456
E9QNR6	brain,spleen,	RIPA,	mRNA	8	0	0	0	3	298	0.197987
E9QNV2	spleen,	RIPA,	mRNA	0	0	0	0	3	1376	0.028343
E9QNW6	liver,kidney,	RIPA,	mRNA	0	0	3	5	0	415	0.0915663
E9QP49	spleen,	RIPA,	mRNA	0	0	0	0	12	1718	0.0541327
E9QP62	liver,brain,spleen,kidney,heart,	RIPA,	mRNA	2	6	16	7	16	387	0.0490956
E9QPB3	spleen,	RIPA,	mRNA	0	0	0	0	7	1118	0.0411449
E9QPE7	spleen,	RIPA,	mRNA	0	0	0	0	232	1938	0.535604
E9QPQ8	kidney,	RIPA,	mRNA	0	0	2	0	0	211	0.0521327
E9QPR5	spleen,	RIPA,	mRNA	0	0	0	0	4	951	0.0609884
E9QPX1	liver,spleen,kidney,heart,	RIPA,	mRNA	0	4	5	4	3	1774	0.0208568
ENSMUSP00000094863.3	liver,brain,spleen,kidney,heart,	RIPA,	mRNA	8	4	7	3	6	253	0.280632
ENSMUSP00000119474.1	liver,	RIPA,	mRNA	0	0	0	24	0	256	0.722656
ENSMUSP00000119552.1	spleen,	RIPA,	mRNA	0	0	0	0	2	781	0.0486556
ENSMUSP00000132472.2	spleen,heart,	RIPA,	mRNA	0	8	0	0	58	317	0.287066
ENSMUSP00000136734.1	brain,	RIPA,	mRNA	6	0	0	0	0	412	0.0849515
ENSMUSP00000137236.1	spleen,	RIPA,	mRNA	0	0	0	0	26	283	0.441696
F6PZL4	spleen,	RIPA,	mRNA	0	0	0	0	4	682	0.0674487
F6Q8A4	brain,spleen,	RIPA,	mRNA	2	0	0	0	24	741	0.0350877
F6Q8D3	spleen,	RIPA,	mRNA	0	0	0	0	2	1129	0.0221435
F6R7E8	liver,spleen,kidney,heart,	RIPA,	mRNA	0	3	6	4	3	247	0.0809717
F6SEU4	brain,	RIPA,	mRNA	11	0	0	0	0	1340	0.0537313
F6T4M4	liver,brain,spleen,kidney,heart,	RIPA,	mRNA	11	6	14	10	14	140	0.15
F6UND7	spleen,	RIPA,	mRNA	0	0	0	0	22	524	0.181298
F6VRP8	liver,kidney,	RIPA,	mRNA	0	0	4	4	0	139	0.223022
F6WMJ3	spleen,	RIPA,	mRNA	0	0	0	0	10	795	0.138365
F6WR04	liver,brain,spleen,kidney,	RIPA,	mRNA	5	0	5	9	13	341	0.108504
F6XI62	heart,	RIPA,	mRNA	0	2	0	0	0	279	0.0681004
F6Y616	brain,spleen,	RIPA,	mRNA	3	0	0	0	4	484	0.0309917
F6YRW4	spleen,	RIPA,	mRNA	0	0	0	0	2	1161	0.00861326
F6YUI5	liver,spleen,	RIPA,	mRNA	0	0	0	7	8	184	0.467391
F6ZGI7	liver,kidney,	RIPA,	mRNA	0	0	3	3	0	88	0.363636
F6ZHD8	liver,spleen,heart,	RIPA,	mRNA	0	2	0	49	7	702	0.0185185
F7BAB2	brain,	RIPA,	mRNA	2	0	0	0	0	1078	0.0306122
F7BGR7	liver,brain,spleen,kidney,	RIPA,	mRNA	4	0	3	4	11	477	0.113208
F7BJB9	spleen,	RIPA,	mRNA	0	0	0	0	8	942	0.100849
F7C0H6	liver,brain,spleen,kidney,heart,	RIPA,	mRNA	12	2	2	2	4	184	0.336957
F7D3W5	spleen,	RIPA,	mRNA	0	0	0	0	4	961	0.082206
F8VPK0	spleen,	RIPA,	mRNA	0	0	0	0	8	1563	0.0575816
F8VPN4	liver,brain,spleen,kidney,heart,	RIPA,	mRNA	6	5	2	84	13	1532	0.0528721
F8VPQ2	spleen,	RIPA,	mRNA	0	0	0	0	3	1261	0.0222046
F8VPR1	spleen,	RIPA,	mRNA	0	0	0	0	2	595	0.0201681
F8VPU6	brain,	RIPA,	mRNA	2	0	0	0	0	2556	0.00508607
F8VPY2	spleen,	RIPA,	mRNA	0	0	0	0	2	801	0.0262172
F8VQ93	spleen,	RIPA,	mRNA	0	0	0	0	2	1821	0.0181219
F8VQD7	kidney,	RIPA,	mRNA	0	0	2	0	0	1442	0.017337
F8VQE9	brain,	RIPA,	mRNA	11	0	0	0	0	910	0.0769231
F8VQG4	spleen,	RIPA,	mRNA	0	0	0	0	6	363	0.0991736
F8VQK3	spleen,	RIPA,	mRNA	0	0	0	0	3	730	0.0589041
F8VQK7	liver,brain,spleen,	RIPA,	mRNA	4	0	0	4	5	162	0.296296
F8VQL0	liver,spleen,	RIPA,	mRNA	0	0	0	2	4	1379	0.00435098
F8WHD8	spleen,	RIPA,	mRNA	0	0	0	0	2	1479	0.00540906
F8WHL2	liver,spleen,kidney,	RIPA,	mRNA	0	0	7	24	61	1233	0.0640714
F8WHN2	brain,	RIPA,	mRNA	2	0	0	0	0	251	0.0916335
F8WIJ0	spleen,	RIPA,	mRNA	0	0	0	0	4	1087	0.0294388
F8WIS9	spleen,	RIPA,	mRNA	0	0	0	0	9	489	0.110429
F8WIT2	liver,spleen,	RIPA,	mRNA	0	0	0	84	187	667	0.670165
F8WIU1	brain,spleen,kidney,	RIPA,	mRNA	6	0	5	0	3	177	0.310734
F8WIV2	liver,brain,spleen,kidney,heart,	RIPA,	mRNA	3	7	9	4	48	399	0.0902256
F8WIZ7	kidney,	RIPA,	mRNA	0	0	3	0	0	967	0.0237849
F8WJ05	liver,spleen,kidney,heart,	RIPA,	mRNA	0	9	13	13	9	911	0.110867
F8WJD4	spleen,	RIPA,	mRNA	0	0	0	0	11	1288	0.0784161
F8WJE0	liver,brain,spleen,kidney,heart,	RIPA,	mRNA	4	2	19	22	123	658	0.0851064
G3UVU2	liver,brain,spleen,kidney,	RIPA,	mRNA	6	0	4	5	12	485	0.162887
G3UVW1	spleen,	RIPA,	mRNA	0	0	0	0	3	178	0.191011
G3UW46	brain,kidney,heart,	RIPA,	mRNA	3	3	3	0	0	246	0.146341
G3UW70	kidney,	RIPA,	mRNA	0	0	2	0	0	145	0.206897
G3UWD3	liver,kidney,heart,	RIPA,	mRNA	0	2	41	2	0	255	0.0470588
G3UXW9	liver,spleen,kidney,	RIPA,	mRNA	0	0	3	3	14	526	0.0475285
G3UY42	spleen,	RIPA,	mRNA	0	0	0	0	7	319	0.244514
G3UY93	brain,kidney,	RIPA,	mRNA	3	0	10	0	0	1278	0.0359937
G3UYX7	kidney,	RIPA,	mRNA	0	0	2	0	0	1542	0.0214008
G3UZP7	spleen,	RIPA,	mRNA	0	0	0	0	4	95	0.294737
G3X8P9	liver,brain,	RIPA,	mRNA	3	0	0	60	0	1333	0.0187547
G3X8R0	spleen,	RIPA,	mRNA	0	0	0	0	4	189	0.15873
G3X8T9	liver,kidney,heart,	RIPA,	mRNA	0	23	20	24	0	418	0.184211
G3X8U3	spleen,	RIPA,	mRNA	0	0	0	0	14	338	0.420118
G3X8U9	spleen,	RIPA,	mRNA	0	0	0	0	11	427	0.112412
G3X8Y3	liver,spleen,	RIPA,	mRNA	0	0	0	4	18	865	0.0381503
G3X914	spleen,	RIPA,	mRNA	0	0	0	0	6	855	0.0584795
G3X920	spleen,	RIPA,	mRNA	0	0	0	0	4	673	0.0757801
G3X922	spleen,	RIPA,	mRNA	0	0	0	0	28	2243	0.122604
G3X925	spleen,	RIPA,	mRNA	0	0	0	0	38	574	0.391986
G3X928	liver,spleen,kidney,	RIPA,	mRNA	0	0	2	4	9	998	0.0210421
G3X949	spleen,	RIPA,	mRNA	0	0	0	0	3	513	0.0584795
G3X956	spleen,kidney,	RIPA,	mRNA	0	0	2	0	29	1047	0.0143266
G3X961	spleen,	RIPA,	mRNA	0	0	0	0	2	584	0.0188356
G3X963	spleen,	RIPA,	mRNA	0	0	0	0	3	1364	0.0285924
G3X973	liver,spleen,	RIPA,	mRNA	0	0	0	2	4	2571	0.00894594
G3X977	liver,brain,spleen,kidney,heart,	RIPA,	mRNA	2	10	13	13	14	950	0.0368421
G3X981	brain,spleen,	RIPA,	mRNA	32	0	0	0	15	507	0.483235
G3X982	liver,	RIPA,	mRNA	0	0	0	184	0	1335	0.630712
G3X987	spleen,	RIPA,	mRNA	0	0	0	0	8	291	0.209622
G3X9A7	brain,	RIPA,	mRNA	2	0	0	0	0	321	0.0778816
G3X9B1	spleen,	RIPA,	mRNA	0	0	0	0	13	2143	0.0839944
G3X9G9	kidney,	RIPA,	mRNA	0	0	4	0	0	244	0.122951
G3X9H5	spleen,	RIPA,	mRNA	0	0	0	0	7	3120	0.0195513
G3X9K3	spleen,	RIPA,	mRNA	0	0	0	0	9	1846	0.0422535
G3X9M0	liver,spleen,kidney,	RIPA,	mRNA	0	0	8	7	4	396	0.146465
G3X9N3	brain,	RIPA,	mRNA	6	0	0	0	0	661	0.0680787
G3X9Q3	spleen,	RIPA,	mRNA	0	0	0	0	54	1116	0.241935
G3X9T7	liver,spleen,kidney,	RIPA,	mRNA	0	0	3	27	17	353	0.0906516
G3X9Y5	liver,spleen,	RIPA,	mRNA	0	0	0	3	11	1085	0.0331797
G3X9Y6	liver,kidney,	RIPA,	mRNA	0	0	6	8	0	323	0.0557276
G3XA48	liver,brain,spleen,kidney,heart,	RIPA,	mRNA	17	8	24	19	8	283	0.597173
G5DDB7	brain,spleen,	RIPA,	mRNA	2	0	0	0	2	782	0.0396419
G5E814	liver,brain,spleen,kidney,heart,	RIPA,	mRNA	4	4	3	2	2	143	0.258741
G5E833	spleen,	RIPA,	mRNA	0	0	0	0	2	898	0.0122494
G5E846	heart,	RIPA,	mRNA	0	21	0	0	0	475	0.246316
G5E895	liver,brain,spleen,kidney,heart,	RIPA,	mRNA	6	17	11	3	16	316	0.120253
G5E897	spleen,	RIPA,	mRNA	0	0	0	0	4	503	0.0934394
G5E898	kidney,	RIPA,	mRNA	0	0	5	0	0	1754	0.0302166
G5E8A0	spleen,	RIPA,	mRNA	0	0	0	0	7	757	0.0568032
G5E8C4	spleen,	RIPA,	mRNA	0	0	0	0	2	920	0.025
G5E8F4	spleen,	RIPA,	mRNA	0	0	0	0	2	590	0.0542373
G5E8F8	spleen,	RIPA,	mRNA	0	0	0	0	7	816	0.0735294
G5E8J3	liver,spleen,	RIPA,	mRNA	0	0	0	2	5	1223	0.0245298
G5E8R1	liver,	RIPA,	mRNA	0	0	0	54	0	248	0.633065
G5E8U5	kidney,	RIPA,	mRNA	0	0	3	0	0	201	0.189055
G5E8U9	spleen,	RIPA,	mRNA	0	0	0	0	5	348	0.140805
G5E911	spleen,	RIPA,	mRNA	0	0	0	0	3	247	0.17004
H3BJQ0	spleen,	RIPA,	mRNA	0	0	0	0	3	251	0.119522
H3BJS9	spleen,	RIPA,	mRNA	0	0	0	0	41	87	0.931034
H3BJU5	liver,	RIPA,	mRNA	0	0	0	2	0	139	0.143885
H3BK01	spleen,	RIPA,	mRNA	0	0	0	0	3	623	0.0529695
H3BK65	liver,brain,spleen,kidney,	RIPA,	mRNA	6	0	17	11	26	933	0.0932476
H3BKH6	liver,brain,spleen,kidney,heart,	RIPA,	mRNA	18	8	51	64	47	295	0.447458
H3BLD9	brain,	RIPA,	mRNA	3	0	0	0	0	189	0.238095
H3BLL2	brain,kidney,heart,	RIPA,	mRNA	8	3	3	0	0	348	0.295977
H3BLL3	spleen,	RIPA,	mRNA	0	0	0	0	6	649	0.104777
H7BWY6	liver,brain,kidney,heart,	RIPA,	mRNA	2	4	11	18	0	245	0.114286
H7BX05	heart,	RIPA,	mRNA	0	4	0	0	0	8032	0.00834163
H7BX59	spleen,	RIPA,	mRNA	0	0	0	0	3	441	0.0929705
H9KV04	spleen,	RIPA,	mRNA	0	0	0	0	3	660	0.0545455
I1E4X5	spleen,	RIPA,	mRNA	0	0	0	0	8	991	0.106963
I3ITR1	brain,	RIPA,	mRNA	4	0	0	0	0	129	0.294574
II_1061374	liver,brain,spleen,kidney,	RIPA,	ncRNA	2	0	8	23	24	1734	0.0155709
II_858901	liver,brain,spleen,kidney,	RIPA,	mRNA	5	0	6	8	15	510	0.101961
II_930227	spleen,	RIPA,	mRNA	0	0	0	0	3	223	0.0493274
II_963637	spleen,	RIPA,	mRNA	0	0	0	0	3	279	0.197133
IP_1017129	liver,	RIPA,	ncRNA	0	0	0	106	0	337	0.459941
IP_1020420	liver,	RIPA,	ncRNA	0	0	0	4	0	167	0.191617
IP_1020636	brain,kidney,	RIPA,	ncRNA	26	0	29	0	0	154	0.272727
IP_1023015	liver,brain,spleen,kidney,heart,	RIPA,	ncRNA	63	28	53	73	30	194	0.396907
IP_1023370	brain,	RIPA,	mRNA	42	0	0	0	0	231	0.458874
IP_1042237	liver,spleen,	RIPA,	ncRNA	0	0	0	4	2	73	0.438356
IP_1052575	spleen,	RIPA,	ncRNA	0	0	0	0	122	297	0.643098
IP_1052782	brain,	RIPA,	ncRNA	2	0	0	0	0	70	0.385714
IP_1053598	brain,spleen,kidney,heart,	RIPA,	ncRNA	68	55	66	0	100	108	0.481481
IP_1053643	brain,	RIPA,	ncRNA	48	0	0	0	0	159	0.36478
IP_1071672	liver,spleen,kidney,	RIPA,	mRNA	0	0	54	12	140	134	0.514925
IP_1071674	liver,brain,spleen,kidney,	RIPA,	mRNA	13	0	8	7	45	105	0.314286
IP_1071877	liver,	RIPA,	ncRNA	0	0	0	10	0	173	0.248555
IP_1071946	brain,	RIPA,	ncRNA	2	0	0	0	0	160	0.10625
IP_1072618	spleen,	RIPA,	ncRNA	0	0	0	0	12	105	0.67619
IP_1078481	brain,kidney,	RIPA,	ncRNA	51	0	47	0	0	333	0.393393
IP_1081770	liver,spleen,	RIPA,	ncRNA	0	0	0	4	5	133	0.240602
IP_1083461	liver,brain,spleen,	RIPA,	ncRNA	21	0	0	18	12	248	0.354839
IP_1083497	liver,brain,spleen,kidney,heart,	RIPA,	ncRNA	5	5	6	4	7	178	0.11236
IP_1093270	brain,spleen,	RIPA,	ncRNA	140	0	0	0	119	290	0.793103
IP_1093458	brain,	RIPA,	ncRNA	3	0	0	0	0	166	0.162651
IP_1099887	liver,brain,spleen,kidney,	RIPA,	mRNA	225	0	232	146	580	372	0.844086
IP_1100888	brain,	RIPA,	ncRNA	117	0	0	0	0	318	0.578616
IP_1102242	spleen,	RIPA,	ncRNA	0	0	0	0	22	293	0.174061
IP_1109535	liver,spleen,	RIPA,	mRNA	0	0	0	16	26	216	0.199074
IP_1110662	liver,brain,spleen,kidney,heart,	RIPA,	ncRNA	93	89	103	99	81	255	0.67451
IP_1111334	liver,kidney,heart,	RIPA,	ncRNA	0	30	28	24	0	176	0.471591
IP_1119298	liver,kidney,	RIPA,	ncRNA	0	0	24	33	0	293	0.409556
IP_1119760	liver,brain,spleen,kidney,heart,	RIPA,	ncRNA	30	33	44	32	26	231	0.363636
IP_1120161	kidney,	RIPA,	ncRNA	0	0	5	0	0	282	0.120567
IP_1121553	liver,brain,	RIPA,	ncRNA	42	0	0	27	0	308	0.529221
IP_1121727	spleen,	RIPA,	ncRNA	0	0	0	0	10	151	0.245033
IP_1142731	heart,	RIPA,	ncRNA	0	51	0	0	0	335	0.289552
IP_1143026	liver,heart,	RIPA,	ncRNA	0	4	0	21	0	196	0.219388
IP_1143115	kidney,heart,	RIPA,	ncRNA	0	11	15	0	0	203	0.172414
IP_825639	liver,brain,spleen,kidney,	RIPA,	ncRNA	22	0	24	23	25	105	0.714286
IP_825640	liver,brain,	RIPA,	ncRNA	39	0	0	33	0	179	0.446927
IP_826632	liver,brain,spleen,kidney,heart,	RIPA,	ncRNA	39	29	33	31	24	161	0.279503
IP_828139	spleen,heart,	RIPA,	ncRNA	0	3	0	0	3	104	0.375
IP_828140	liver,spleen,kidney,	RIPA,	ncRNA	0	0	49	37	71	195	0.297436
IP_830413	brain,	RIPA,	mRNA	4	0	0	0	0	470	0.0659574
IP_830515	heart,	RIPA,	ncRNA	0	10	0	0	0	141	0.170213
IP_838531	liver,brain,kidney,heart,	RIPA,	ncRNA	34	30	38	35	0	226	0.420354
IP_838933	brain,spleen,kidney,	RIPA,	ncRNA	26	0	21	0	19	80	0.3625
IP_839118	brain,spleen,kidney,	RIPA,	ncRNA	57	0	60	0	47	206	0.325243
IP_840321	brain,	RIPA,	ncRNA	14	0	0	0	0	125	0.248
IP_840920	liver,brain,	RIPA,	ncRNA	85	0	0	70	0	335	0.456716
IP_840954	liver,brain,spleen,kidney,heart,	RIPA,	ncRNA	15	11	11	10	7	312	0.128205
IP_840988	liver,brain,spleen,kidney,	RIPA,	ncRNA	28	0	31	24	22	161	0.236025
IP_855998	liver,spleen,	RIPA,	ncRNA	0	0	0	5	2	77	0.636364
IP_856053	liver,kidney,	RIPA,	ncRNA	0	0	2	2	0	174	0.0632184
IP_856169	liver,	RIPA,	ncRNA	0	0	0	8	0	99	0.494949
IP_856950	liver,brain,spleen,kidney,heart,	RIPA,	ncRNA	46	34	45	28	43	417	0.455635
IP_857122	liver,spleen,heart,	RIPA,	ncRNA	0	149	0	179	143	333	0.72973
IP_857188	liver,brain,spleen,	RIPA,	ncRNA	56	0	0	62	48	333	0.411411
IP_857249	liver,spleen,kidney,	RIPA,	ncRNA	0	0	24	15	14	211	0.270142
IP_857304	liver,brain,kidney,heart,	RIPA,	ncRNA	26	23	26	19	0	158	0.481013
IP_857373	liver,brain,kidney,heart,	RIPA,	ncRNA	11	10	7	22	0	164	0.158537
IP_869105	heart,	RIPA,	ncRNA	0	6	0	0	0	397	0.133501
IP_870788	liver,brain,spleen,kidney,	RIPA,	ncRNA	152	0	145	163	126	333	0.804805
IP_873151	liver,spleen,	RIPA,	ncRNA	0	0	0	5	2	59	0.542373
IP_873735	spleen,kidney,heart,	RIPA,	ncRNA	0	45	52	0	54	222	0.630631
IP_875392	brain,kidney,	RIPA,	ncRNA	3	0	4	0	0	237	0.147679
IP_875569	brain,spleen,	RIPA,	ncRNA	26	0	0	0	19	161	0.304348
IP_875930	liver,	RIPA,	ncRNA	0	0	0	4	0	102	0.313725
IP_879384	spleen,heart,	RIPA,	ncRNA	0	2	0	0	2	45	0.466667
IP_899467	liver,brain,spleen,kidney,heart,	RIPA,	ncRNA	83	60	76	91	65	253	0.640316
IP_900469	liver,brain,spleen,kidney,heart,	RIPA,	ncRNA	25	18	26	22	18	225	0.16
IP_900570	brain,kidney,	RIPA,	ncRNA	19	0	9	0	0	135	0.57037
IP_901140	spleen,kidney,	RIPA,	ncRNA	0	0	44	0	34	277	0.3213
IP_901156	brain,	RIPA,	ncRNA	39	0	0	0	0	281	0.170819
IP_901578	brain,	RIPA,	ncRNA	114	0	0	0	0	199	0.668342
IP_901984	spleen,kidney,heart,	RIPA,	ncRNA	0	3	2	0	2	112	0.3125
IP_903807	liver,brain,	RIPA,	ncRNA	28	0	0	27	0	308	0.224026
IP_922292	liver,kidney,	RIPA,	ncRNA	0	0	6	4	0	100	0.17
IP_923032	brain,spleen,	RIPA,	ncRNA	9	0	0	0	7	64	0.4375
IP_925956	brain,kidney,heart,	RIPA,	ncRNA	2	2	2	0	0	99	0.242424
IP_927108	brain,spleen,kidney,	RIPA,	ncRNA	278	0	115	0	232	444	0.702703
IP_947820	liver,spleen,	RIPA,	ncRNA	0	0	0	44	59	348	0.344828
IP_948444	brain,	RIPA,	ncRNA	11	0	0	0	0	93	0.44086
IP_949778	liver,brain,spleen,kidney,heart,	RIPA,	ncRNA	61	59	65	62	54	179	0.458101
IP_950324	brain,spleen,	RIPA,	ncRNA	3	0	0	0	2	115	0.121739
IP_968243	heart,	RIPA,	ncRNA	0	113	0	0	0	321	0.364486
IP_971110	brain,kidney,heart,	RIPA,	ncRNA	8	3	7	0	0	615	0.162602
IP_971241	spleen,heart,	RIPA,	ncRNA	0	51	0	0	42	275	0.421818
IP_973081	liver,	RIPA,	ncRNA	0	0	0	10	0	150	0.306667
IP_988848	liver,brain,spleen,heart,	RIPA,	ncRNA	95	85	0	91	71	335	0.531343
IP_988951	liver,brain,spleen,kidney,heart,	RIPA,	ncRNA	6	4	3	18	3	88	0.318182
IP_989449	brain,	RIPA,	ncRNA	16	0	0	0	0	142	0.274648
IP_989450	liver,brain,heart,	RIPA,	ncRNA	17	19	0	17	0	103	0.252427
IP_989670	brain,spleen,kidney,heart,	RIPA,	ncRNA	3	2	5	0	5	64	0.328125
IP_989692	brain,kidney,heart,	RIPA,	ncRNA	10	8	7	0	0	105	0.495238
IP_991364	liver,spleen,kidney,	RIPA,	ncRNA	0	0	82	98	136	269	0.587361
J3KMM1	spleen,	RIPA,	mRNA	0	0	0	0	18	1324	0.163897
J3QJU5	liver,brain,kidney,	RIPA,	mRNA	2	0	3	2	0	1051	0.0123692
J3QK20	brain,	RIPA,	mRNA	10	0	0	0	0	519	0.171484
J3QK52	spleen,	RIPA,	mRNA	0	0	0	0	4	750	0.036
J3QMG3	liver,kidney,heart,	RIPA,	mRNA	0	21	13	12	0	284	0.197183
J3QN19	spleen,	RIPA,	mRNA	0	0	0	0	3	418	0.0741627
J3QN31	liver,spleen,kidney,heart,	RIPA,	mRNA	0	24	2	8	16	480	0.229167
J3QN89	liver,brain,kidney,	RIPA,	mRNA	3	0	2	3	0	436	0.100917
J3QNK8	brain,spleen,kidney,	RIPA,	mRNA	9	0	5	0	4	481	0.199584
J3QNT6	liver,	RIPA,	mRNA	0	0	0	5	0	144	0.319444
J3QNW4	spleen,	RIPA,	mRNA	0	0	0	0	2	418	0.114833
J3QNY6	liver,	RIPA,	mRNA	0	0	0	2	0	1321	0.01514
K3W4M4	liver,brain,spleen,kidney,heart,	RIPA,	mRNA	29	28	30	18	14	365	0.572603
K3W4Q9	liver,spleen,kidney,	RIPA,	mRNA	0	0	5	3	3	463	0.140389
K3W4S4	brain,	RIPA,	mRNA	2	0	0	0	0	1345	0.0156134
L7N451	spleen,	RIPA,	mRNA	0	0	0	0	3	2427	0.0177173
L7N463	liver,	RIPA,	mRNA	0	0	0	25	0	504	0.210317
L7N466	liver,spleen,kidney,	RIPA,	mRNA	0	0	7	9	3	203	0.418719
NP_001032243.1	liver,	RIPA,	mRNA	0	0	0	3	0	132	0.219697
NP_001128587.1	spleen,	RIPA,	mRNA	0	0	0	0	4	417	0.0959233
NP_001153010.1	spleen,	RIPA,	mRNA	0	0	0	0	18	656	0.233232
NP_001153082.1	brain,spleen,kidney,	RIPA,	mRNA	5	0	2	0	3	281	0.238434
NP_001157042.1	spleen,kidney,	RIPA,	mRNA	0	0	2	0	5	280	0.139286
NP_001157645.1	spleen,	RIPA,	mRNA	0	0	0	0	23	1450	0.171724
NP_001157726.1	heart,	RIPA,	mRNA	0	169	0	0	0	248	0.802419
NP_001158150.1	kidney,	RIPA,	mRNA	0	0	21	0	0	872	0.228211
NP_001159366.1	spleen,	RIPA,	mRNA	0	0	0	0	6	488	0.127049
NP_001185927.1	brain,	RIPA,	mRNA	26	0	0	0	0	284	0.341549
NP_001240680.1	liver,spleen,	RIPA,	mRNA	0	0	0	19	7	420	0.27619
NP_001240742.1	spleen,	RIPA,	mRNA	0	0	0	0	9	932	0.083691
NP_001240796.1	liver,	RIPA,	mRNA	0	0	0	3	0	245	0.0693878
NP_001241664.1	spleen,	RIPA,	mRNA	0	0	0	0	21	232	0.25
NP_001265376.1	liver,brain,spleen,heart,	RIPA,	mRNA	6	2	0	4	9	212	0.278302
NP_001268950.1	spleen,	RIPA,	mRNA	0	0	0	0	38	374	0.5
NP_001269048.1	liver,brain,kidney,	RIPA,	mRNA	2	0	2	5	0	746	0.0294906
NP_001273146.1	kidney,	RIPA,	mRNA	0	0	16	0	0	161	0.658385
NP_001273649.1	spleen,	RIPA,	mRNA	0	0	0	0	2	1814	0.00937155
NP_001276695.1	spleen,	RIPA,	mRNA	0	0	0	0	7	642	0.0903427
NP_001289136.1	spleen,	RIPA,	mRNA	0	0	0	0	23	1270	0.175591
NP_001289962.1	spleen,	RIPA,	mRNA	0	0	0	0	2	1893	0.0174326
NP_001290375.1	liver,brain,spleen,	RIPA,	mRNA	11	0	0	2	9	236	0.377119
NP_001291885.1	spleen,	RIPA,	mRNA	0	0	0	0	2	371	0.032345
NP_001291920.1	spleen,	RIPA,	mRNA	0	0	0	0	15	522	0.0881226
NP_001300640.1	brain,spleen,kidney,heart,	RIPA,	mRNA	8	11	18	0	27	275	0.0981818
NP_001300687.1	brain,spleen,kidney,heart,	RIPA,	mRNA	16	2	12	0	33	321	0.286604
NP_001300887.1	liver,brain,spleen,heart,	RIPA,	mRNA	20	25	0	20	14	470	0.129787
NP_001303296.1	brain,spleen,	RIPA,	mRNA	5	0	0	0	3	408	0.139706
NP_001303662.1	liver,brain,spleen,kidney,	RIPA,	mRNA	3	0	4	2	7	232	0.103448
NP_001304102.1	brain,spleen,	RIPA,	mRNA	2	0	0	0	20	895	0.0223464
NP_001304170.1	liver,spleen,	RIPA,	mRNA	0	0	0	6	21	314	0.136943
NP_034536.2	liver,spleen,kidney,	RIPA,	mRNA	0	0	3	5	6	1685	0.0302671
NP_082015.2	spleen,	RIPA,	mRNA	0	0	0	0	4	569	0.112478
NP_112419.3	liver,brain,spleen,kidney,	RIPA,	mRNA	14	0	24	41	32	990	0.142424
NP_778169.1	liver,brain,spleen,kidney,heart,	RIPA,	mRNA	7	3	5	10	9	182	0.197802
O08528	brain,spleen,heart,	RIPA,	mRNA	9	8	0	0	11	917	0.0632497
O08529	liver,brain,spleen,kidney,	RIPA,	mRNA	3	0	3	4	19	700	0.0485714
O08532	heart,	RIPA,	mRNA	0	9	0	0	0	1103	0.114234
O08538	spleen,	RIPA,	mRNA	0	0	0	0	2	498	0.0481928
O08547	liver,brain,spleen,	RIPA,	mRNA	2	0	0	6	13	215	0.0651163
O08582	liver,brain,spleen,	RIPA,	mRNA	3	0	0	2	18	668	0.0553892
O08586	brain,spleen,	RIPA,	mRNA	2	0	0	0	3	403	0.044665
O08599	brain,	RIPA,	mRNA	122	0	0	0	0	594	0.636364
O08601	liver,	RIPA,	mRNA	0	0	0	116	0	894	0.565996
O08601-2	kidney,	RIPA,	mRNA	0	0	8	0	0	909	0.0880088
O08638	spleen,	RIPA,	mRNA	0	0	0	0	224	1972	0.509635
O08691	kidney,	RIPA,	mRNA	0	0	3	0	0	354	0.115819
O08738	liver,spleen,kidney,	RIPA,	mRNA	0	0	3	7	13	276	0.0688406
O08740	brain,kidney,	RIPA,	mRNA	2	0	2	0	0	117	0.128205
O08759	spleen,	RIPA,	mRNA	0	0	0	0	13	870	0.127586
O08797	liver,brain,spleen,kidney,heart,	RIPA,	mRNA	2	4	6	4	18	374	0.0828877
O08800	kidney,	RIPA,	mRNA	0	0	5	0	0	374	0.173797
O08807	liver,	RIPA,	mRNA	0	0	0	36	0	274	0.616788
O08811	spleen,	RIPA,	mRNA	0	0	0	0	2	760	0.0460526
O08848	spleen,	RIPA,	mRNA	0	0	0	0	2	538	0.0464684
O08912	spleen,kidney,	RIPA,	mRNA	0	0	2	0	3	559	0.0286225
O08915	liver,brain,spleen,kidney,	RIPA,	mRNA	12	0	3	3	10	330	0.330303
O08989	brain,	RIPA,	mRNA	2	0	0	0	0	208	0.129808
O08992	brain,spleen,	RIPA,	mRNA	3	0	0	0	4	299	0.0769231
O09012	liver,	RIPA,	mRNA	0	0	0	13	0	639	0.262911
O09043	kidney,	RIPA,	mRNA	0	0	9	0	0	419	0.152745
O09046-2	spleen,	RIPA,	mRNA	0	0	0	0	12	638	0.170846
O09053	spleen,	RIPA,	mRNA	0	0	0	0	4	1401	0.0192719
O09106	spleen,	RIPA,	mRNA	0	0	0	0	24	482	0.30083
O09110	spleen,	RIPA,	mRNA	0	0	0	0	5	347	0.14121
O09111	liver,brain,kidney,heart,	RIPA,	mRNA	6	4	7	2	0	151	0.311258
O09126	spleen,	RIPA,	mRNA	0	0	0	0	6	861	0.0615563
O09158	liver,	RIPA,	mRNA	0	0	0	5	0	503	0.0497018
O09172	liver,brain,spleen,kidney,	RIPA,	mRNA	7	0	14	16	13	274	0.20073
O35075	spleen,	RIPA,	mRNA	0	0	0	0	3	297	0.178451
O35130	spleen,	RIPA,	mRNA	0	0	0	0	6	244	0.303279
O35134	spleen,	RIPA,	mRNA	0	0	0	0	2	1717	0.0133955
O35144	spleen,	RIPA,	mRNA	0	0	0	0	4	541	0.0536044
O35166	spleen,	RIPA,	mRNA	0	0	0	0	7	212	0.306604
O35206	kidney,heart,	RIPA,	mRNA	0	61	25	0	0	1367	0.135333
O35218	spleen,kidney,	RIPA,	mRNA	0	0	2	0	16	782	0.0332481
O35226	liver,brain,spleen,heart,	RIPA,	mRNA	13	7	0	15	11	376	0.359043
O35239	spleen,	RIPA,	mRNA	0	0	0	0	9	593	0.136594
O35309	liver,spleen,	RIPA,	mRNA	0	0	0	6	9	314	0.181529
O35350	liver,brain,spleen,kidney,heart,	RIPA,	mRNA	6	2	13	2	55	713	0.0771388
O35379	spleen,	RIPA,	mRNA	0	0	0	0	2	1528	0.0170157
O35382	spleen,	RIPA,	mRNA	0	0	0	0	15	975	0.137436
O35386	liver,kidney,	RIPA,	mRNA	0	0	10	29	0	338	0.133136
O35387	liver,brain,kidney,heart,	RIPA,	mRNA	4	2	2	2	0	280	0.175
O35405	liver,brain,spleen,kidney,	RIPA,	mRNA	13	0	2	2	14	488	0.178279
O35423	liver,	RIPA,	mRNA	0	0	0	34	0	414	0.403382
O35435	brain,spleen,kidney,heart,	RIPA,	mRNA	15	12	9	0	5	395	0.435443
O35473	spleen,	RIPA,	mRNA	0	0	0	0	2	141	0.12766
O35488	liver,kidney,	RIPA,	mRNA	0	0	18	33	0	620	0.196774
O35526	brain,	RIPA,	mRNA	5	0	0	0	0	288	0.138889
O35551-6	brain,spleen,	RIPA,	mRNA	21	0	0	0	3	864	0.22338
O35593	liver,brain,spleen,kidney,heart,	RIPA,	mRNA	4	4	7	8	16	310	0.180645
O35615	liver,spleen,	RIPA,	mRNA	0	0	0	3	4	995	0.0291457
O35621	brain,	RIPA,	mRNA	7	0	0	0	0	262	0.232824
O35639	liver,brain,spleen,kidney,heart,	RIPA,	mRNA	2	10	11	2	31	323	0.0495356
O35654	spleen,	RIPA,	mRNA	0	0	0	0	7	469	0.187633
O35657	spleen,kidney,	RIPA,	mRNA	0	0	7	0	2	409	0.102689
O35658	brain,kidney,	RIPA,	mRNA	19	0	17	0	0	278	0.52518
O35680	liver,heart,	RIPA,	mRNA	0	3	0	2	0	139	0.0791367
O35682	spleen,	RIPA,	mRNA	0	0	0	0	2	320	0.084375
O35684	brain,	RIPA,	mRNA	4	0	0	0	0	410	0.1
O35685	liver,brain,spleen,kidney,heart,	RIPA,	mRNA	24	8	15	16	24	332	0.506024
O35744	spleen,kidney,	RIPA,	mRNA	0	0	2	0	33	398	0.0854271
O35864	liver,brain,spleen,kidney,heart,	RIPA,	mRNA	11	2	3	5	14	334	0.278443
O35887	liver,brain,spleen,kidney,heart,	RIPA,	mRNA	5	14	12	11	8	315	0.212698
O35900	liver,brain,spleen,heart,	RIPA,	mRNA	5	3	0	2	8	95	0.484211
O35930	spleen,	RIPA,	mRNA	0	0	0	0	19	734	0.171662
O35955	liver,brain,spleen,kidney,heart,	RIPA,	mRNA	3	10	9	7	29	273	0.208791
O35969-2	liver,brain,kidney,	RIPA,	mRNA	6	0	4	20	0	252	0.357143
O35972	liver,brain,spleen,kidney,heart,	RIPA,	mRNA	6	8	6	5	5	146	0.445205
O54692	spleen,	RIPA,	mRNA	0	0	0	0	4	779	0.0654685
O54734	liver,brain,spleen,kidney,	RIPA,	mRNA	4	0	8	10	26	441	0.0816327
O54782	liver,brain,spleen,heart,	RIPA,	mRNA	2	2	0	4	13	1018	0.021611
O54788	spleen,	RIPA,	mRNA	0	0	0	0	5	344	0.142442
O54825	spleen,	RIPA,	mRNA	0	0	0	0	16	436	0.220183
O54833	spleen,	RIPA,	mRNA	0	0	0	0	10	350	0.277143
O54834	spleen,	RIPA,	mRNA	0	0	0	0	2	987	0.04154
O54865	spleen,	RIPA,	mRNA	0	0	0	0	10	620	0.0983871
O54890	spleen,	RIPA,	mRNA	0	0	0	0	27	787	0.321474
O54950	liver,spleen,	RIPA,	mRNA	0	0	0	3	8	330	0.0909091
O54984	liver,brain,spleen,kidney,	RIPA,	mRNA	7	0	8	3	11	348	0.178161
O54991	brain,	RIPA,	mRNA	6	0	0	0	0	1385	0.0563177
O55013	brain,spleen,kidney,	RIPA,	mRNA	6	0	2	0	6	180	0.272222
O55026	spleen,	RIPA,	mRNA	0	0	0	0	3	495	0.0747475
O55028	brain,spleen,kidney,	RIPA,	mRNA	4	0	3	0	2	412	0.0558252
O55029	liver,spleen,kidney,	RIPA,	mRNA	0	0	6	22	53	905	0.079558
O55033	brain,spleen,	RIPA,	mRNA	6	0	0	0	4	380	0.155263
O55057	brain,kidney,heart,	RIPA,	mRNA	6	2	2	0	0	150	0.333333
O55091	brain,	RIPA,	mRNA	9	0	0	0	0	318	0.295597
O55100	brain,	RIPA,	mRNA	3	0	0	0	0	234	0.102564
O55101	spleen,	RIPA,	mRNA	0	0	0	0	2	224	0.0446429
O55102	spleen,	RIPA,	mRNA	0	0	0	0	3	125	0.256
O55135	liver,brain,spleen,kidney,heart,	RIPA,	mRNA	8	8	13	11	12	245	0.428571
O55137	liver,brain,spleen,kidney,heart,	RIPA,	mRNA	5	18	20	18	9	419	0.0954654
O55229	spleen,	RIPA,	mRNA	0	0	0	0	2	394	0.0812183
O55234	liver,brain,spleen,kidney,heart,	RIPA,	mRNA	23	8	24	28	15	264	0.397727
O55236	spleen,	RIPA,	mRNA	0	0	0	0	3	597	0.078727
O55242	spleen,	RIPA,	mRNA	0	0	0	0	2	223	0.0941704
O70138	spleen,	RIPA,	mRNA	0	0	0	0	2	465	0.0516129
O70145	spleen,	RIPA,	mRNA	0	0	0	0	14	525	0.19619
O70152	liver,spleen,	RIPA,	mRNA	0	0	0	4	11	260	0.223077
O70157	spleen,	RIPA,	mRNA	0	0	0	0	2	1003	0.0109671
O70166	brain,	RIPA,	mRNA	6	0	0	0	0	180	0.2
O70172	brain,spleen,	RIPA,	mRNA	10	0	0	0	19	405	0.187654
O70209	spleen,heart,	RIPA,	mRNA	0	7	0	0	9	316	0.202532
O70274	spleen,	RIPA,	mRNA	0	0	0	0	5	167	0.317365
O70293-2	spleen,	RIPA,	mRNA	0	0	0	0	4	589	0.0696095
O70378	liver,brain,spleen,kidney,heart,	RIPA,	mRNA	5	3	5	8	4	207	0.352657
O70423	spleen,	RIPA,	mRNA	0	0	0	0	4	765	0.0901961
O70435	liver,brain,spleen,kidney,heart,	RIPA,	mRNA	30	22	23	22	28	255	0.568627
O70456	brain,spleen,kidney,	RIPA,	mRNA	41	0	20	0	29	248	0.197581
O70475	liver,spleen,kidney,	RIPA,	mRNA	0	0	16	56	2	493	0.35497
O70481	spleen,	RIPA,	mRNA	0	0	0	0	7	1757	0.0557769
O70494	spleen,	RIPA,	mRNA	0	0	0	0	4	783	0.0217114
O70503	liver,spleen,	RIPA,	mRNA	0	0	0	6	15	312	0.121795
O70551	spleen,	RIPA,	mRNA	0	0	0	0	4	648	0.0354938
O70571	heart,	RIPA,	mRNA	0	4	0	0	0	412	0.135922
O88188	spleen,	RIPA,	mRNA	0	0	0	0	2	162	0.0925926
O88307	spleen,	RIPA,	mRNA	0	0	0	0	13	2215	0.068623
O88342	liver,brain,spleen,kidney,heart,	RIPA,	mRNA	100	33	53	31	100	606	0.575908
O88343-2	kidney,	RIPA,	mRNA	0	0	21	0	0	1035	0.142029
O88351	spleen,	RIPA,	mRNA	0	0	0	0	18	757	0.194188
O88379	spleen,	RIPA,	mRNA	0	0	0	0	9	1555	0.0199357
O88384	spleen,	RIPA,	mRNA	0	0	0	0	4	232	0.237069
O88413	kidney,	RIPA,	mRNA	0	0	3	0	0	460	0.0413043
O88428	liver,spleen,kidney,	RIPA,	mRNA	0	0	22	25	2	621	0.281804
O88441	brain,spleen,kidney,heart,	RIPA,	mRNA	4	3	2	0	2	263	0.231939
O88451	liver,	RIPA,	mRNA	0	0	0	36	0	316	0.503165
O88508	spleen,	RIPA,	mRNA	0	0	0	0	3	908	0.0396476
O88543	liver,brain,spleen,kidney,	RIPA,	mRNA	3	0	4	4	12	423	0.134752
O88544	liver,brain,spleen,kidney,heart,	RIPA,	mRNA	11	2	5	3	23	406	0.251232
O88545	liver,brain,spleen,kidney,	RIPA,	mRNA	4	0	2	3	9	324	0.188272
O88587	liver,brain,spleen,kidney,heart,	RIPA,	mRNA	3	10	24	45	17	265	0.177358
O88597	spleen,	RIPA,	mRNA	0	0	0	0	5	448	0.0870536
O88653	brain,spleen,heart,	RIPA,	mRNA	4	2	0	0	5	124	0.491935
O88668	liver,brain,spleen,kidney,	RIPA,	mRNA	2	0	6	9	14	220	0.131818
O88685	liver,spleen,kidney,heart,	RIPA,	mRNA	0	32	40	49	46	442	0.531674
O88696	liver,brain,spleen,kidney,heart,	RIPA,	mRNA	9	7	9	12	10	272	0.279412
O88708	spleen,	RIPA,	mRNA	0	0	0	0	3	433	0.106236
O88712	brain,spleen,kidney,heart,	RIPA,	mRNA	29	5	9	0	14	441	0.287982
O88745	brain,	RIPA,	mRNA	2	0	0	0	0	98	0.163265
O88783	spleen,	RIPA,	mRNA	0	0	0	0	9	2183	0.0508475
O88792	spleen,kidney,	RIPA,	mRNA	0	0	3	0	3	300	0.0866667
O88796	spleen,	RIPA,	mRNA	0	0	0	0	10	268	0.376866
O88811	kidney,	RIPA,	mRNA	0	0	2	0	0	523	0.040153
O88834-2	brain,	RIPA,	mRNA	2	0	0	0	0	344	0.101744
O88851	liver,brain,spleen,kidney,	RIPA,	mRNA	2	0	7	2	3	186	0.0806452
O88879	spleen,	RIPA,	mRNA	0	0	0	0	12	1249	0.11289
O88951	brain,	RIPA,	mRNA	14	0	0	0	0	207	0.458937
O88958	liver,brain,spleen,kidney,heart,	RIPA,	mRNA	7	4	42	5	12	289	0.238754
O88968	kidney,heart,	RIPA,	mRNA	0	3	12	0	0	430	0.1
O88983	spleen,	RIPA,	mRNA	0	0	0	0	5	236	0.182203
O88986	liver,kidney,	RIPA,	mRNA	0	0	3	22	0	416	0.108173
O88990	spleen,	RIPA,	mRNA	0	0	0	0	50	900	0.14
O88998	brain,	RIPA,	mRNA	11	0	0	0	0	485	0.16701
O89013	spleen,	RIPA,	mRNA	0	0	0	0	4	131	0.0992366
O89050	spleen,	RIPA,	mRNA	0	0	0	0	2	735	0.0380952
O89079	liver,spleen,kidney,	RIPA,	mRNA	0	0	6	6	15	308	0.25974
O89100	spleen,	RIPA,	mRNA	0	0	0	0	14	322	0.310559
O89103	kidney,heart,	RIPA,	mRNA	0	4	2	0	0	644	0.0838509
O89112	brain,spleen,	RIPA,	mRNA	6	0	0	0	4	399	0.107769
P00186	liver,	RIPA,	mRNA	0	0	0	27	0	513	0.434698
P00375	liver,brain,spleen,kidney,heart,	RIPA,	mRNA	3	3	19	12	8	187	0.176471
P00397	spleen,	RIPA,	mRNA	0	0	0	0	4	514	0.0428016
P00416	liver,spleen,	RIPA,	mRNA	0	0	0	2	4	261	0.0536398
P00687	liver,kidney,	RIPA,	mRNA	0	0	2	2	0	511	0.0430528
P00688	heart,	RIPA,	mRNA	0	5	0	0	0	508	0.124016
P01728	spleen,	RIPA,	mRNA	0	0	0	0	3	117	0.282051
P01865	liver,brain,spleen,kidney,heart,	RIPA,	mRNA	6	17	18	9	16	398	0.148241
P01867	spleen,kidney,heart,	RIPA,	mRNA	0	5	3	0	3	404	0.101485
P01882	spleen,	RIPA,	mRNA	0	0	0	0	10	290	0.275862
P01897	spleen,kidney,	RIPA,	mRNA	0	0	7	0	41	362	0.226519
P01898	liver,spleen,kidney,heart,	RIPA,	mRNA	0	7	12	11	8	325	0.267692
P01900	liver,spleen,kidney,	RIPA,	mRNA	0	0	6	12	50	365	0.150685
P01902	liver,spleen,kidney,	RIPA,	mRNA	0	0	4	6	34	368	0.125
P01915	spleen,	RIPA,	mRNA	0	0	0	0	25	264	0.443182
P01921	brain,spleen,kidney,	RIPA,	mRNA	2	0	5	0	61	265	0.0792453
P02301	spleen,	RIPA,	ncRNA	0	0	0	0	32	136	0.639706
P03888	spleen,	RIPA,	mRNA	0	0	0	0	2	318	0.0628931
P03911	spleen,	RIPA,	mRNA	0	0	0	0	10	459	0.202614
P03958	liver,brain,spleen,kidney,	RIPA,	mRNA	3	0	6	3	27	352	0.122159
P04184	spleen,	RIPA,	mRNA	0	0	0	0	8	233	0.236052
P04202	spleen,	RIPA,	mRNA	0	0	0	0	7	390	0.15641
P04228	brain,spleen,	RIPA,	mRNA	2	0	0	0	20	256	0.148438
P04919	brain,spleen,kidney,	RIPA,	mRNA	3	0	15	0	79	929	0.022605
P04939	heart,	RIPA,	mRNA	0	5	0	0	0	184	0.108696
P05132	brain,spleen,kidney,	RIPA,	mRNA	4	0	2	0	14	351	0.0997151
P05532	spleen,	RIPA,	mRNA	0	0	0	0	2	979	0.0194076
P06281	kidney,	RIPA,	mRNA	0	0	10	0	0	402	0.221393
P06342	kidney,	RIPA,	mRNA	0	0	2	0	0	265	0.0641509
P06795	spleen,	RIPA,	mRNA	0	0	0	0	4	1276	0.0525078
P07146	spleen,	RIPA,	mRNA	0	0	0	0	2	246	0.0813008
P07361	spleen,	RIPA,	mRNA	0	0	0	0	4	207	0.0434783
P07607	spleen,	RIPA,	mRNA	0	0	0	0	2	307	0.0879479
P07742	spleen,	RIPA,	mRNA	0	0	0	0	32	792	0.319444
P08030	liver,brain,spleen,kidney,heart,	RIPA,	mRNA	9	5	15	13	15	180	0.611111
P08032	liver,brain,spleen,kidney,heart,	RIPA,	mRNA	9	21	39	9	267	2415	0.0480331
P08074	brain,spleen,kidney,heart,	RIPA,	mRNA	4	7	9	0	7	244	0.143443
P08553	brain,	RIPA,	mRNA	415	0	0	0	0	848	0.707547
P08680	spleen,	RIPA,	mRNA	0	0	0	0	3	587	0.0681431
P08730	liver,brain,kidney,	RIPA,	mRNA	32	0	45	30	0	437	0.107551
P08752	brain,spleen,kidney,	RIPA,	mRNA	10	0	7	0	58	355	0.183099
P09041	brain,kidney,	RIPA,	mRNA	44	0	32	0	0	417	0.170264
P09055	liver,spleen,kidney,	RIPA,	mRNA	0	0	24	15	41	798	0.233083
P09470	kidney,	RIPA,	mRNA	0	0	7	0	0	1312	0.0640244
P09581	spleen,	RIPA,	mRNA	0	0	0	0	2	977	0.0214944
P0C027	brain,	RIPA,	mRNA	4	0	0	0	0	164	0.317073
P0C0A3	brain,spleen,	RIPA,	mRNA	2	0	0	0	2	200	0.105
P0C605-2	spleen,	RIPA,	mRNA	0	0	0	0	3	686	0.0641399
P0C7N9	spleen,	RIPA,	mRNA	0	0	0	0	2	123	0.219512
P10417	spleen,	RIPA,	mRNA	0	0	0	0	3	236	0.15678
P10630-2	liver,brain,spleen,kidney,	RIPA,	mRNA	23	0	34	29	70	408	0.355392
P10649	liver,brain,spleen,kidney,heart,	RIPA,	mRNA	52	42	86	160	45	218	0.715596
P10810	spleen,	RIPA,	mRNA	0	0	0	0	6	366	0.169399
P10833	liver,brain,spleen,kidney,	RIPA,	mRNA	5	0	4	5	10	218	0.178899
P11031	liver,brain,spleen,kidney,	RIPA,	mRNA	6	0	4	2	9	127	0.370079
P11152	kidney,heart,	RIPA,	mRNA	0	14	2	0	0	474	0.187764
P11369	spleen,	RIPA,	mRNA	0	0	0	0	2	1281	0.00624512
P11440	spleen,	RIPA,	mRNA	0	0	0	0	21	297	0.43771
P11672	spleen,	RIPA,	mRNA	0	0	0	0	10	200	0.31
P11680	liver,spleen,kidney,heart,	RIPA,	mRNA	0	6	5	3	5	464	0.148707
P11688	liver,spleen,	RIPA,	mRNA	0	0	0	7	3	1053	0.0845204
P11835	spleen,	RIPA,	mRNA	0	0	0	0	51	771	0.442283
P11859	liver,	RIPA,	mRNA	0	0	0	2	0	477	0.0880503
P11911	spleen,	RIPA,	mRNA	0	0	0	0	3	220	0.145455
P11930	liver,spleen,kidney,heart,	RIPA,	mRNA	0	9	87	14	3	357	0.254902
P12246	brain,kidney,heart,	RIPA,	mRNA	2	4	5	0	0	224	0.116071
P12265	liver,brain,spleen,kidney,heart,	RIPA,	mRNA	3	5	32	20	21	648	0.0679012
P12382	liver,brain,spleen,kidney,heart,	RIPA,	mRNA	23	3	13	16	29	780	0.221795
P12804	heart,	RIPA,	mRNA	0	2	0	0	0	432	0.0393519
P12815	liver,brain,spleen,kidney,heart,	RIPA,	mRNA	14	5	9	9	10	191	0.350785
P12849	brain,spleen,	RIPA,	mRNA	6	0	0	0	8	381	0.131234
P13020	spleen,kidney,	RIPA,	mRNA	0	0	55	0	89	780	0.407692
P13379	spleen,	RIPA,	mRNA	0	0	0	0	2	494	0.0526316
P13439	liver,spleen,kidney,	RIPA,	mRNA	0	0	3	5	18	481	0.0602911
P13597	liver,spleen,kidney,	RIPA,	mRNA	0	0	8	5	20	537	0.0875233
P13745	liver,kidney,heart,	RIPA,	mRNA	0	3	16	43	0	223	0.130045
P14069	spleen,heart,	RIPA,	mRNA	0	2	0	0	5	89	0.0898876
P14106	brain,spleen,	RIPA,	mRNA	3	0	0	0	7	253	0.0750988
P14206	liver,brain,spleen,kidney,heart,	RIPA,	mRNA	41	41	55	55	58	295	0.583051
P14234	spleen,	RIPA,	mRNA	0	0	0	0	19	517	0.222437
P14576	spleen,	RIPA,	mRNA	0	0	0	0	7	504	0.146825
P14685	liver,spleen,kidney,	RIPA,	mRNA	0	0	3	17	48	530	0.0377358
P14824	liver,brain,spleen,kidney,heart,	RIPA,	mRNA	58	34	48	84	187	673	0.33581
P14901	liver,spleen,	RIPA,	mRNA	0	0	0	2	40	289	0.0449827
P15327	liver,brain,spleen,kidney,heart,	RIPA,	mRNA	14	19	17	9	34	259	0.440154
P15532	liver,brain,spleen,kidney,heart,	RIPA,	mRNA	45	34	59	39	38	152	0.776316
P15535	spleen,	RIPA,	mRNA	0	0	0	0	3	399	0.0927318
P15920	spleen,	RIPA,	mRNA	0	0	0	0	3	856	0.046729
P15947	kidney,	RIPA,	mRNA	0	0	15	0	0	261	0.295019
P16277	spleen,	RIPA,	mRNA	0	0	0	0	10	499	0.0821643
P16294	liver,spleen,kidney,	RIPA,	mRNA	0	0	3	3	5	471	0.118896
P16301	liver,heart,	RIPA,	mRNA	0	2	0	4	0	438	0.0707763
P16331	liver,kidney,	RIPA,	mRNA	0	0	42	79	0	453	0.456954
P16381	liver,	RIPA,	mRNA	0	0	0	34	0	660	0.325758
P16406	liver,spleen,kidney,	RIPA,	mRNA	0	0	3	11	2	945	0.0328042
P16627	liver,brain,spleen,kidney,heart,	RIPA,	mRNA	51	36	53	42	38	641	0.274571
P16879	spleen,	RIPA,	mRNA	0	0	0	0	2	822	0.0304136
P17156	liver,brain,spleen,kidney,heart,	RIPA,	mRNA	130	62	80	79	79	633	0.526066
P17426	liver,brain,spleen,kidney,	RIPA,	mRNA	21	0	6	10	50	977	0.128966
P17427	spleen,	RIPA,	mRNA	0	0	0	0	68	938	0.468017
P17439	liver,brain,spleen,	RIPA,	mRNA	2	0	0	15	5	515	0.0504854
P17710	liver,brain,spleen,kidney,heart,	RIPA,	mRNA	73	20	48	6	50	974	0.386037
P17809	spleen,	RIPA,	mRNA	0	0	0	0	2	492	0.0162602
P17879	liver,brain,spleen,kidney,heart,	RIPA,	mRNA	76	63	83	82	47	642	0.437695
P17897	brain,	RIPA,	mRNA	2	0	0	0	0	148	0.121622
P17918	spleen,	RIPA,	mRNA	0	0	0	0	33	261	0.666667
P18052	spleen,	RIPA,	mRNA	0	0	0	0	4	829	0.0458384
P18654	spleen,	RIPA,	mRNA	0	0	0	0	26	740	0.235135
P18872-2	spleen,	RIPA,	mRNA	0	0	0	0	15	354	0.149718
P19001	liver,spleen,kidney,heart,	RIPA,	mRNA	0	36	51	26	30	403	0.166253
P19137	kidney,	RIPA,	mRNA	0	0	4	0	0	3084	0.0175097
P19437	spleen,	RIPA,	mRNA	0	0	0	0	15	291	0.182131
P21107-2	liver,	RIPA,	mRNA	0	0	0	92	0	248	0.818548
P21278	spleen,	RIPA,	mRNA	0	0	0	0	9	359	0.289694
P21279	brain,spleen,	RIPA,	mRNA	8	0	0	0	12	359	0.21727
P21300	spleen,kidney,	RIPA,	mRNA	0	0	9	0	14	316	0.218354
P21956	spleen,	RIPA,	mRNA	0	0	0	0	16	463	0.194384
P21958	spleen,	RIPA,	mRNA	0	0	0	0	26	724	0.251381
P21995	kidney,	RIPA,	mRNA	0	0	5	0	0	330	0.0848485
P22366	spleen,	RIPA,	mRNA	0	0	0	0	3	296	0.0777027
P22437	spleen,kidney,	RIPA,	mRNA	0	0	2	0	24	602	0.0365449
P22646	spleen,	RIPA,	mRNA	0	0	0	0	2	189	0.126984
P23492	liver,brain,spleen,kidney,heart,	RIPA,	mRNA	17	11	52	44	44	289	0.508651
P23589	liver,	RIPA,	mRNA	0	0	0	4	0	299	0.220736
P23591	spleen,	RIPA,	mRNA	0	0	0	0	14	321	0.423676
P23611	spleen,	RIPA,	mRNA	0	0	0	0	4	424	0.129717
P24456	liver,	RIPA,	mRNA	0	0	0	64	0	504	0.46627
P24472	liver,brain,spleen,kidney,heart,	RIPA,	mRNA	11	8	4	23	7	222	0.261261
P24527	liver,brain,spleen,kidney,heart,	RIPA,	mRNA	25	2	17	37	89	611	0.302782
P24638	liver,spleen,	RIPA,	mRNA	0	0	0	2	12	423	0.0449173
P24668	brain,spleen,kidney,	RIPA,	mRNA	2	0	3	0	13	278	0.0503597
P24788	spleen,	RIPA,	mRNA	0	0	0	0	11	784	0.118622
P25206	spleen,	RIPA,	mRNA	0	0	0	0	49	812	0.481527
P25444	liver,brain,spleen,kidney,heart,	RIPA,	mRNA	23	9	25	36	48	293	0.426621
P25688	liver,	RIPA,	mRNA	0	0	0	101	0	303	0.709571
P25785	brain,	RIPA,	mRNA	4	0	0	0	0	220	0.122727
P25799	spleen,kidney,	RIPA,	mRNA	0	0	2	0	29	971	0.0236869
P25911	liver,brain,spleen,	RIPA,	mRNA	5	0	0	2	32	512	0.0351562
P25911-2	spleen,	RIPA,	mRNA	0	0	0	0	33	491	0.488798
P25918	spleen,	RIPA,	mRNA	0	0	0	0	3	547	0.0457038
P26011	spleen,	RIPA,	mRNA	0	0	0	0	4	806	0.0372208
P26039	spleen,kidney,	RIPA,	mRNA	0	0	154	0	586	2541	0.437623
P26262	liver,spleen,kidney,heart,	RIPA,	mRNA	0	2	2	6	4	638	0.0423197
P26369	liver,brain,spleen,kidney,	RIPA,	mRNA	10	0	15	8	31	475	0.172632
P26450	liver,spleen,	RIPA,	mRNA	0	0	0	2	13	724	0.0524862
P26516	liver,brain,spleen,kidney,heart,	RIPA,	mRNA	7	5	11	12	24	321	0.205607
P27046	liver,spleen,kidney,	RIPA,	mRNA	0	0	2	12	23	1150	0.0217391
P27600	spleen,kidney,	RIPA,	mRNA	0	0	5	0	6	379	0.0712401
P27601	brain,spleen,kidney,	RIPA,	mRNA	5	0	5	0	20	377	0.061008
P27612	liver,spleen,kidney,	RIPA,	mRNA	0	0	8	11	39	794	0.0730479
P27659	liver,brain,spleen,kidney,	RIPA,	mRNA	32	0	20	24	42	403	0.379653
P27808	spleen,	RIPA,	mRNA	0	0	0	0	3	447	0.0536913
P27870	spleen,	RIPA,	mRNA	0	0	0	0	31	845	0.294675
P28063	liver,brain,spleen,kidney,	RIPA,	mRNA	2	0	3	7	27	276	0.0869565
P28076	liver,brain,spleen,kidney,heart,	RIPA,	mRNA	4	5	2	11	22	219	0.210046
P28352	liver,brain,spleen,kidney,	RIPA,	mRNA	5	0	2	5	21	317	0.236593
P28474	liver,brain,spleen,kidney,heart,	RIPA,	mRNA	14	5	29	55	24	374	0.227273
P28650	brain,	RIPA,	mRNA	21	0	0	0	0	457	0.31291
P28651	brain,	RIPA,	mRNA	22	0	0	0	0	291	0.391753
P28652	brain,	RIPA,	mRNA	68	0	0	0	0	542	0.50369
P28654	kidney,heart,	RIPA,	mRNA	0	11	3	0	0	354	0.189266
P28738	brain,	RIPA,	mRNA	29	0	0	0	0	956	0.225941
P28843	liver,spleen,kidney,	RIPA,	mRNA	0	0	2	26	12	760	0.0223684
P28867-2	spleen,	RIPA,	mRNA	0	0	0	0	16	700	0.208571
P29351-3	spleen,	RIPA,	mRNA	0	0	0	0	105	556	0.739209
P29387	brain,	RIPA,	mRNA	11	0	0	0	0	340	0.135294
P29416	liver,brain,spleen,kidney,	RIPA,	mRNA	5	0	2	3	11	528	0.125
P29452	spleen,	RIPA,	mRNA	0	0	0	0	16	402	0.348259
P29533	brain,spleen,kidney,	RIPA,	mRNA	4	0	4	0	19	739	0.0568336
P29758	liver,brain,spleen,kidney,heart,	RIPA,	mRNA	41	54	70	47	41	439	0.70615
P30282	spleen,	RIPA,	mRNA	0	0	0	0	3	292	0.0650685
P30285	spleen,	RIPA,	mRNA	0	0	0	0	11	303	0.174917
P30412	liver,spleen,kidney,heart,	RIPA,	mRNA	0	10	12	3	8	212	0.306604
P31428	spleen,kidney,heart,	RIPA,	mRNA	0	6	9	0	2	410	0.097561
P32233	liver,spleen,kidney,	RIPA,	mRNA	0	0	2	4	16	367	0.0626703
P32883-2	liver,brain,	RIPA,	mRNA	12	0	0	5	0	188	0.531915
P32921-2	brain,spleen,kidney,	RIPA,	mRNA	18	0	8	0	37	475	0.433684
P33174	spleen,	RIPA,	mRNA	0	0	0	0	5	1231	0.0381803
P33267	liver,	RIPA,	mRNA	0	0	0	48	0	491	0.435845
P33609	spleen,	RIPA,	mRNA	0	0	0	0	10	1465	0.109215
P33610	spleen,	RIPA,	mRNA	0	0	0	0	4	505	0.0930693
P35278	brain,spleen,kidney,	RIPA,	mRNA	10	0	29	0	26	216	0.444444
P35279	liver,brain,heart,	RIPA,	mRNA	24	7	0	6	0	208	0.557692
P35279-2	brain,spleen,kidney,	RIPA,	mRNA	24	0	13	0	15	208	0.557692
P35282	liver,brain,spleen,kidney,heart,	RIPA,	mRNA	7	9	14	5	12	222	0.306306
P35285	spleen,	RIPA,	mRNA	0	0	0	0	4	194	0.180412
P35288	brain,	RIPA,	mRNA	2	0	0	0	0	237	0.113924
P35292	liver,kidney,	RIPA,	mRNA	0	0	5	3	0	214	0.271028
P35294	spleen,	RIPA,	mRNA	0	0	0	0	3	217	0.101382
P35441	spleen,kidney,	RIPA,	mRNA	0	0	9	0	94	1170	0.0760684
P35492	liver,	RIPA,	mRNA	0	0	0	56	0	657	0.649924
P35585	liver,spleen,	RIPA,	mRNA	0	0	0	2	25	423	0.0732861
P35737	spleen,	RIPA,	mRNA	0	0	0	0	5	261	0.180077
P35762	spleen,	RIPA,	mRNA	0	0	0	0	5	236	0.182203
P35821	spleen,	RIPA,	mRNA	0	0	0	0	18	432	0.24537
P35922	liver,brain,spleen,kidney,	RIPA,	mRNA	9	0	7	6	7	614	0.0879479
P35951	liver,	RIPA,	mRNA	0	0	0	2	0	862	0.0290023
P35980	liver,brain,spleen,kidney,heart,	RIPA,	mRNA	13	7	21	14	30	188	0.37766
P35991	spleen,	RIPA,	mRNA	0	0	0	0	16	659	0.227618
P36371	spleen,	RIPA,	mRNA	0	0	0	0	29	702	0.320513
P36423	spleen,	RIPA,	mRNA	0	0	0	0	6	533	0.0863039
P36552	liver,brain,spleen,kidney,heart,	RIPA,	mRNA	6	2	34	35	23	443	0.110609
P36916	liver,brain,spleen,	RIPA,	mRNA	14	0	0	2	4	607	0.115321
P37040	liver,brain,spleen,kidney,	RIPA,	mRNA	3	0	19	51	18	678	0.0707965
P39039	liver,heart,	RIPA,	mRNA	0	2	0	3	0	239	0.0585774
P39053-4	brain,	RIPA,	mRNA	120	0	0	0	0	864	0.582176
P39429-2	spleen,	RIPA,	mRNA	0	0	0	0	3	508	0.0748031
P39655	spleen,	RIPA,	mRNA	0	0	0	0	34	663	0.402715
P39688	spleen,	RIPA,	mRNA	0	0	0	0	17	537	0.134078
P39876	spleen,	RIPA,	mRNA	0	0	0	0	6	211	0.208531
P40201	spleen,	RIPA,	mRNA	0	0	0	0	3	1711	0.0175336
P40237	spleen,	RIPA,	mRNA	0	0	0	0	5	266	0.120301
P40336-2	liver,brain,spleen,kidney,heart,	RIPA,	mRNA	7	2	6	4	12	359	0.24234
P40338	liver,	RIPA,	mRNA	0	0	0	2	0	181	0.176796
P40936	liver,kidney,heart,	RIPA,	mRNA	0	3	70	51	0	264	0.0984848
P41155	spleen,	RIPA,	mRNA	0	0	0	0	2	306	0.0490196
P41241	spleen,	RIPA,	mRNA	0	0	0	0	33	450	0.42
P41245	spleen,	RIPA,	mRNA	0	0	0	0	5	730	0.0876712
P41317	liver,spleen,	RIPA,	mRNA	0	0	0	7	2	244	0.245902
P42128	spleen,	RIPA,	mRNA	0	0	0	0	2	719	0.00973574
P42232	spleen,	RIPA,	mRNA	0	0	0	0	13	786	0.165394
P42337	spleen,	RIPA,	mRNA	0	0	0	0	2	1068	0.0440075
P42932	liver,brain,spleen,kidney,heart,	RIPA,	mRNA	48	11	42	49	79	548	0.468978
P43025	kidney,	RIPA,	mRNA	0	0	2	0	0	202	0.0594059
P43247	spleen,	RIPA,	mRNA	0	0	0	0	13	935	0.135829
P43346	spleen,	RIPA,	mRNA	0	0	0	0	4	260	0.215385
P43406	liver,brain,spleen,kidney,	RIPA,	mRNA	2	0	2	2	3	1044	0.0181992
P43430	spleen,	RIPA,	mRNA	0	0	0	0	4	247	0.097166
P45377	spleen,	RIPA,	mRNA	0	0	0	0	15	316	0.411392
P46412	liver,brain,spleen,kidney,heart,	RIPA,	mRNA	2	8	16	7	6	226	0.10177
P46638	liver,brain,spleen,kidney,heart,	RIPA,	mRNA	20	15	30	22	27	218	0.490826
P46664	liver,brain,spleen,kidney,	RIPA,	mRNA	34	0	17	11	22	456	0.493421
P46737	brain,spleen,kidney,	RIPA,	mRNA	5	0	2	0	7	291	0.195876
P46935	liver,spleen,kidney,	RIPA,	mRNA	0	0	10	4	33	887	0.109357
P47713	spleen,	RIPA,	mRNA	0	0	0	0	11	748	0.127005
P47811	spleen,kidney,	RIPA,	mRNA	0	0	5	0	23	360	0.05
P47856	spleen,	RIPA,	mRNA	0	0	0	0	9	697	0.0961263
P47857-3	liver,brain,spleen,kidney,heart,	RIPA,	mRNA	45	15	6	6	11	931	0.332975
P47968	liver,brain,spleen,kidney,heart,	RIPA,	mRNA	8	9	14	5	16	303	0.313531
P48025	spleen,	RIPA,	mRNA	0	0	0	0	65	629	0.527822
P48320	brain,	RIPA,	mRNA	2	0	0	0	0	585	0.0478632
P48410	spleen,	RIPA,	mRNA	0	0	0	0	3	736	0.048913
P48774	liver,brain,spleen,kidney,heart,	RIPA,	mRNA	23	9	30	10	16	224	0.53125
P48776	liver,	RIPA,	mRNA	0	0	0	3	0	406	0.103448
P49138	spleen,	RIPA,	mRNA	0	0	0	0	14	386	0.202073
P49182	liver,spleen,kidney,heart,	RIPA,	mRNA	0	5	6	6	3	478	0.0983264
P49183	kidney,	RIPA,	mRNA	0	0	2	0	0	284	0.0598592
P49222	spleen,	RIPA,	mRNA	0	0	0	0	30	691	0.322721
P49290	spleen,	RIPA,	mRNA	0	0	0	0	7	716	0.0698324
P49429	liver,kidney,	RIPA,	mRNA	0	0	6	88	0	393	0.201018
P49442	liver,brain,spleen,kidney,	RIPA,	mRNA	11	0	4	5	13	396	0.222222
P49443	liver,brain,spleen,kidney,	RIPA,	mRNA	20	0	3	10	8	382	0.463351
P49586	liver,spleen,kidney,	RIPA,	mRNA	0	0	7	5	7	367	0.163488
P49615	liver,brain,spleen,kidney,	RIPA,	mRNA	20	0	4	6	18	292	0.44863
P49717	spleen,	RIPA,	mRNA	0	0	0	0	49	862	0.403712
P49722	liver,brain,spleen,kidney,heart,	RIPA,	mRNA	23	15	19	23	27	234	0.645299
P49962	brain,spleen,kidney,heart,	RIPA,	mRNA	2	3	2	0	2	86	0.197674
P50114	brain,	RIPA,	mRNA	5	0	0	0	0	92	0.163043
P50247	liver,brain,spleen,kidney,heart,	RIPA,	mRNA	51	28	95	207	87	432	0.548611
P50285	liver,kidney,	RIPA,	mRNA	0	0	2	18	0	532	0.0545113
P50427	liver,spleen,	RIPA,	mRNA	0	0	0	6	4	624	0.11859
P50428	liver,brain,spleen,kidney,	RIPA,	mRNA	12	0	4	7	3	506	0.258893
P50431	liver,spleen,kidney,heart,	RIPA,	mRNA	0	3	17	54	9	478	0.0774059
P50446	liver,brain,	RIPA,	mRNA	48	0	0	52	0	553	0.189873
P50580	liver,brain,spleen,kidney,heart,	RIPA,	mRNA	29	20	34	31	50	394	0.48731
P50586	brain,	RIPA,	mRNA	3	0	0	0	0	505	0.0554455
P50608	brain,spleen,	RIPA,	mRNA	3	0	0	0	2	376	0.106383
P50637	spleen,	RIPA,	mRNA	0	0	0	0	5	169	0.35503
P51150	liver,brain,spleen,kidney,heart,	RIPA,	mRNA	28	15	26	17	50	207	0.584541
P51163	liver,brain,spleen,	RIPA,	mRNA	3	0	0	2	9	265	0.166038
P51175	spleen,	RIPA,	mRNA	0	0	0	0	8	477	0.243187
P51410	liver,	RIPA,	mRNA	0	0	0	13	0	192	0.484375
P51432	brain,spleen,	RIPA,	mRNA	2	0	0	0	10	1234	0.0226904
P51658	liver,	RIPA,	mRNA	0	0	0	2	0	381	0.0577428
P51807	brain,spleen,kidney,heart,	RIPA,	mRNA	4	2	2	0	4	113	0.389381
P51855	liver,brain,spleen,kidney,heart,	RIPA,	mRNA	25	19	84	26	13	474	0.352321
P51863	brain,spleen,kidney,	RIPA,	mRNA	4	0	3	0	3	351	0.0683761
P51880	brain,	RIPA,	mRNA	9	0	0	0	0	132	0.484848
P51910	liver,brain,kidney,heart,	RIPA,	mRNA	6	3	2	2	0	189	0.275132
P52196	liver,brain,spleen,kidney,heart,	RIPA,	mRNA	23	9	28	58	5	297	0.37037
P52293	spleen,	RIPA,	mRNA	0	0	0	0	22	529	0.357278
P52430	liver,	RIPA,	mRNA	0	0	0	17	0	355	0.411268
P52431	spleen,kidney,	RIPA,	mRNA	0	0	2	0	26	1105	0.0316742
P52432	brain,spleen,kidney,	RIPA,	mRNA	2	0	2	0	4	346	0.0693642
P52633	spleen,	RIPA,	mRNA	0	0	0	0	11	837	0.155317
P52792-2	liver,	RIPA,	mRNA	0	0	0	13	0	465	0.221505
P52912	brain,spleen,	RIPA,	mRNA	3	0	0	0	5	386	0.0595855
P53810	brain,spleen,kidney,	RIPA,	mRNA	27	0	6	0	18	271	0.594096
P53986	spleen,	RIPA,	mRNA	0	0	0	0	17	493	0.271805
P53994	liver,brain,spleen,kidney,heart,	RIPA,	mRNA	19	4	14	6	20	212	0.419811
P53995	spleen,	RIPA,	mRNA	0	0	0	0	4	1944	0.0216049
P54116	spleen,kidney,	RIPA,	mRNA	0	0	3	0	22	284	0.084507
P54276	liver,spleen,	RIPA,	mRNA	0	0	0	3	9	1358	0.00810015
P54726	liver,brain,spleen,kidney,heart,	RIPA,	mRNA	9	8	6	11	11	363	0.225895
P54731	spleen,	RIPA,	mRNA	0	0	0	0	6	649	0.100154
P54797	kidney,	RIPA,	mRNA	0	0	10	0	0	276	0.405797
P54822	liver,brain,spleen,kidney,heart,	RIPA,	mRNA	2	4	4	9	38	484	0.018595
P54823	liver,brain,spleen,kidney,	RIPA,	mRNA	10	0	13	15	22	483	0.227743
P54923	liver,brain,spleen,kidney,heart,	RIPA,	mRNA	15	5	4	2	17	362	0.350829
P55258	liver,brain,spleen,kidney,heart,	RIPA,	mRNA	19	6	15	6	24	207	0.294686
P55284	kidney,heart,	RIPA,	mRNA	0	4	4	0	0	784	0.0612245
P55937	spleen,	RIPA,	mRNA	0	0	0	0	13	1487	0.0961668
P56183	liver,brain,spleen,	RIPA,	mRNA	2	0	0	2	6	494	0.034413
P56213	liver,brain,spleen,kidney,heart,	RIPA,	mRNA	7	5	4	24	2	198	0.242424
P56371	liver,brain,kidney,heart,	RIPA,	mRNA	14	5	11	3	0	218	0.321101
P56379	heart,	RIPA,	mRNA	0	3	0	0	0	58	0.137931
P56380	liver,brain,spleen,kidney,heart,	RIPA,	mRNA	5	6	8	5	4	147	0.421769
P56387	brain,	RIPA,	mRNA	2	0	0	0	0	116	0.293103
P56390	spleen,	RIPA,	mRNA	0	0	0	0	3	79	0.455696
P56399	brain,spleen,kidney,heart,	RIPA,	mRNA	63	11	38	0	52	858	0.416084
P56528	spleen,	RIPA,	mRNA	0	0	0	0	10	304	0.266447
P56542	liver,brain,spleen,	RIPA,	mRNA	2	0	0	3	8	353	0.0764873
P56593	liver,	RIPA,	mRNA	0	0	0	15	0	492	0.270325
P56656	liver,	RIPA,	mRNA	0	0	0	12	0	490	0.12449
P56873	liver,brain,spleen,kidney,	RIPA,	mRNA	3	0	2	3	2	199	0.135678
P57716	liver,brain,spleen,kidney,heart,	RIPA,	mRNA	11	4	9	5	13	708	0.138418
P57746	brain,spleen,kidney,	RIPA,	mRNA	23	0	7	0	5	247	0.550607
[truncated: 5,122 more rows]

## Sheet: Peptide
Peptide sequence	Peptide length	Accession
AAAAAAAAAAAAAAAGAAGK	20	E9QM38
AAAAEGARPLER	12	Q80UM7
AAAAGALAPGPLPDLAAR	18	Q3TW96
AAAAIMHMIMNNLDPAVAQFPQELVTYGGNGQVFSNWAQFR	41	Q3UEL5
AAAAPFQNSQASVGAPR	17	XP_017176618.1
AAAASAAEAGIATPGTEDSDDALLK	25	O35226
AAAASAAEAGIATPGTEGER	20	O35226-2
AAAASAAEAGIATPGTEGERDSDDALLK	28	O35226-2
AAAATETSSVFADPVISK	18	Q80X85
AAAAYALGR	9	Q6ZQ73
AAADADVSLHNFSAR	15	P0C7N9
AAADDGEEPKSEPETK	16	P28352
AAADLTALVR	10	Q4KL35
AAADTLQGPMQAAYR	15	XP_006530964.1
AAAEDVNVTFEDQQK	15	Q3UWL8
AAAELLQSQGSQAGGSQTLK	20	XP_006541454.1
AAAELLQSQGSQAGGSQTLKR	21	XP_006541454.1
AAAELLQSQGSQAGGSQTLKR	21	Q9R1T4
AAAEVNQEYGLDPK	14	P97807
AAAFEDQENETVVVK	15	P26039
AAAFEQLQK	9	Q9CZW5
AAAFGPDQSLLSPVHVLDLEPR	22	Q9D6Z0
AAAFVTSPPLSPDPTTPDYLTSLLACGDLQVTGSGHCPYSTAQK	44	Q6P1J1; P97427
AAAGAAAAAGGFQR	14	E9Q4N7
AAAGELQEDSGLHVLAR	17	Q8C845
AAAGELQEDSGLLALAK	17	Q9D4J1
AAAGPLPPISADTR	14	XP_006503645.2
AAAGQLLQWK	10	XP_011243420.1
AAAHLTVIEK	10	A2ASS6
AAAITSDLLESLGR	14	Q62009
AAAIVGCIGVIAEVDK	16	Q3UEL5
AAAIVGCIGVIAEVDKAALVK	21	Q3UEL5
AAALATGCTVDIESEAHDYYNVIPNK	26	XP_006537963.1
AAALEAMKDYTK	12	Q60864
AAALEFLNR	9	Q60864
AAALEFLNRFEEAKR	15	Q60864
AAALEMAMIK	10	D3Z7X0
AAALEQFK	8	Q61941
AAANEQLTR	9	XP_006506530.1
AAAPAPEEEMDECEQALAAEPK	22	Q9D8N0
AAAPFPR	7	A0A087WR45
AAAPKAAPAPAAAPAAAPAAAPEPERPK	28	P09542
AAAPRPPGSAASGRPHDDTDSNR	23	Q6PEV3
AAAPSAASSPAEVQSLK	17	E9PVZ8
AAAQCYIDLIIK	12	Q9JIF7
AAAQLGVEELQK	12	E9PUQ5
AAAQLLQSQAQQSGAQQTK	19	XP_011247832.1
AAAQLLQSQAQQSGAQQTKK	20	XP_011247832.1
AAASEGVQVK	10	Q9Z2D6-2
AAASLGDTLSEQQLGDSDIPVIVYR	25	Q4LDD4
AAASTDYYK	9	P35486
AAASTDYYKR	10	P35486
AAASVVSGPPVASDCASPGDSAR	23	XP_006524376.1
AAATEEPEVIPDPAK	15	XP_006512669.1
AAATETPIETSTAPSLEGAPK	21	P70670
AAATFNPELITHILDGSPENTR	22	Q9R0H0
AAATFNPELITHILDGSPENTR	22	Q9R0H0-2
AAATFNPELITHILDGSPENTRR	23	Q9R0H0
AAATFNPELITHILDGSPENTRR	23	Q9R0H0-2
AAATLAAVSGTPGLGAQPAELGTHK	25	E9Q1P8
AAATLMTER	9	P04919
AAATPESQEPQAK	13	P28667
AAATQPDGKDTPDEPWAFPAR	21	Q78PY7
AAATQPDGKDTPDEPWAFPAR	21	Q78PY7; Q3TJ56
AAATSAAVGESADSEAR	17	Q3U4S0
AAATTVQEYLK	11	Q62468
AAAVPVEFK	9	Q91VA7
AAAVPVEFK	9	Q91VA7; XP_006498887.1
AAAVSDIQDLMR	12	Q9CR00
AAAYDKLEK	9	XP_006521907.1
AACEQLHQQQQQQQEETTAATLLLQGEEEGEED	33	P42669
AACICAEEEKEEL	13	XP_006514124.1
AACLESAQEPAGAWSNK	17	Q8VDJ3
AACLPLPGYR	10	Q61233
AACSAAAMEEDSEASSSR	18	O08759
AADAEAEVASLNR	13	P21107
AADAEAEVASLNR	13	E9Q5J9
AADAEAEVASLNRR	14	P21107
AADAEAEVASLNRR	14	E9Q5J9
AADAHVDAHYYEQNEQPTGTCAACITGGNR	30	P55264
AADAVEDLR	9	XP_011243935.1
AADAVGEILLSLSYLPTAER	20	Q920N7
AADDALEDLPLEDTGNLAPF	20	Q9BDB7
AADEEAFEDNSEEYIR	16	Q9ERK4
AADEEAFEDNSEEYIRR	17	Q9ERK4
AADEPEDSELER	12	A0A1B0GSR5
AADEVLAEAK	10	Q8JZM7
AADFEDLLSSQGFNAHK	17	Q80TZ3-3
AADFIEELSSLFK	13	Q5DTJ9
AADFPQELFSWE	12	Q8BGL3
AADFQLHTHVNDGTEFGGSIYQK	23	NP_001185927.1
AADFQLHTHVNDGTEFGGSIYQK	23	ENSMUSP00000137236.1
AADGNYYNAR	10	E9QMK9
AADHLKPFLDDSTLR	15	Q922U1
AADHYSEQMAQR	12	Q8BTS3; XP_006501782.1; Q91Z40; XP_011247687.1
AADILPK	7	Q9CQN1
AADIPGLK	8	Q80YX1
AADKDTCFSTEGPNLVTR	18	P07724
AADLLVNPLDPR	12	XP_011248054.1
AADLRQDFNLMEQK	14	Q9QYB8
AADLVSENCETYEAHMR	17	Q9JLI6
AADMLSGPR	9	Q8CHT0
AADPPAENSSAPEAEQGGAE	20	XP_006502996.1
AADRLPNLASPSAEGPPRPSPGTAPR	26	Q3UDC3
AADSQNSGEGNTSAAESSFSQEVAR	25	F6ZDS4
AADTEVRPLDYK	12	A0A140LJ04
AADTHLIDYEK	11	Q3TQC7
AADTIGYPVMIR	12	Q8C196
AADVHEVRK	9	XP_011240976.1; P52480-2
AADVLVYLADDTVVPLAVENLSSISAHELHR	31	Q3UFK8
AADVNMTDEEGR	12	Q9D061
AAEAAINILK	10	XP_011237819.1
AAEAGADLVMLDNFKPEELHPTAATLK	27	Q91X91
AAEAGDLHTALEK	13	Q8VBW8
AAEAGVTEEQYGYLGTSAK	19	P14873
AAEATEDQETSMS	13	Q8BHE3
AAECNIVVTQPR	12	E9QNN1
AAEDEEVPAFFK	12	XP_006518571.1
AAEDYGVIK	9	P37804
AAEEAEEAREQAER	14	Q9QXS1
AAEEAFVNDIDESSPGTEWER	21	Q6PFA2
AAEEIGIK	8	Q922D8
AAEEVEAK	8	XP_006506530.1
AAEEVKR	7	Q4VWZ5
AAEFHPGLTEGK	12	XP_006512023.1
AAEFHPGLTEGKDK	14	XP_006512023.1
AAEGAAAQNEYEVK	14	F8WJA0
AAEHEVPLQER	11	XP_006529564.1
AAEIGYEDPINPTYEATNAMYHR	23	Q9WU79
AAEILYQLALK	11	P27046
AAELASGDSANVSSR	15	Q8BTI9
AAELETDIR	9	Q91YR7
AAELIANSLATAGDGLIELR	20	P67778
AAELIANSLATAGDGLIELRK	21	P67778
AAELLGVER	9	Q6XPS7
AAELLLPAAAAWR	13	G3X8U3
AAEMLLFGK	9	Q9WUR2
AAEMLLFGK	9	Q9WUR2; Q78JN3
AAEMLLFGKK	10	Q9WUR2
AAEMLLFGKK	10	Q9WUR2; Q78JN3
AAEMMASLLK	10	Q61768
AAENGAQSAPLPLEGVDISPK	21	P30416
AAEPLLTLER	10	Q8CCP0
AAEPMEASLGPR	12	Q6P6J9
AAEQAASDLR	10	Q6URW6-3
AAEQMSTLPIDAPSPLENLEQK	22	XP_006512018.1
AAESLADPTEYENLFPGLK	19	O55029
AAESSAMAATEK	12	Q9Z1P6
AAESSVAPSREELLGTK	17	A0A0R4J0L6
AAETDAATAGVNR	13	Q6A0D4
AAETEAQEGVTR	12	E9Q6J5-3
AAETHFGFETVSEGEK	16	Q9CXI0
AAETSSIPAMER	12	Q8K370
AAEVAVQSGATFITHLFNAMLPFHHR	26	Q8JZV7
AAEVAWPYTESPQALASAAQTAGLR	25	Q8R1F5
AAEVESVKEQLPAK	14	XP_006512018.1
AAEVGDDFLGDFVVGER	17	Q9Z0H8
AAEVPNEELVSLLLK	15	Q8BX70
AAEVYGVR	8	Q9R1Q8
AAFAHFPELYDFALSNVAEVDAR	23	Q8CFQ3
AAFALGGLGSGFASTKEELSALVAPAFAHTSQVLIDK	37	XP_006504154.1
AAFDDAIAELDTLSEESYK	19	P62259
AAFDDAIAELDTLSEESYKDSTLIMQLLR	29	P62259
AAFFAER	7	XP_006502414.1
AAFGLSEAGFNTACLTK	17	Q8K2B3
AAFIDNMNQYTR	12	Q71RI9
AAFIGIGLPEPK	12	Q8CHR6
AAFLQSLVEDR	11	Q3U2P1
AAFLSEQLQPLSR	13	Q62470-2
AAFLTGR	7	P50427
AAFPLHDCR	9	NP_001240742.1
AAFPLLYVR	9	Q91YR5
AAFQLGSPWR	10	P47738
AAFQLGSPWRR	11	P47738
AAFQPEASPSHLTLNSGLVESEDL	24	Q9ET54
AAFQSLLDAR	10	Q63829
AAFQYGIK	8	Q9Z1M8
AAFTAFEEVQLPR	13	Q9D8X2
AAFTMFSR	8	G3X8T3
AAFVAYALAFPR	12	Q8CC86
AAFVLPEFTR	10	Q64674
AAFYEDQINYYDTYIK	16	Q3UQ44
AAFYHQPWAQEAVGR	15	XP_006534615.2
AAGAAAIITEPEHTK	15	Q8BK67
AAGAAAIITEPEHTKER	17	Q8BK67
AAGAAQLTVNSEK	13	XP_006540634.1
AAGAEEYAQQEVVK	14	P16330
AAGAEEYAQQEVVKR	15	P16330
AAGAGNEAAALFLATSGAHANHR	23	Q810B6
AAGALLAR	8	O09172
AAGAQVVAVSR	11	Q91X52
AAGARPLTSPESLSR	15	XP_006524181.1
AAGATELLVR	10	Q8BTR5
AAGCDFNNVVK	11	P52760
AAGDEMGTVR	10	Q9JI11
AAGDETGAKVER	12	P97351
AAGEPGTSMPPEK	13	Q5DTM8
AAGEVMEPANLLAEEKDEDLLFE	23	P57746
AAGFKDPLLASGTDGVGTK	19	Q64737
AAGFPTASVCR	11	Q5U5V2
AAGGAGAQVGGSISSGSSASSVTVTR	26	P48678
AAGGAVSTPAPGK	13	E9Q5C9
AAGHLVR	7	Q99LB7
AAGIEIQK	8	Q6A068
AAGISLIVPGK	11	A2ALS4
AAGKDPFAELSLEDFL	16	XP_006507658.1
AAGLATMISTMRPDIDNMDEYVR	23	G5E866
AAGLLSTFR	9	O35206
AAGLQSEIGQVK	12	F8VPM7
AAGMGSYVQPQR	12	Q9DB42
AAGMLSQLDLFSR	13	Q61249
AAGPGLGSVAMGPR	14	XP_006539388.1
AAGPLESSGKEEITQLK	17	Q99PL5
AAGPLESSGKEEITQLKER	19	Q99PL5
AAGPPTPGLGPVPGPGPGPGPGSVPR	26	O88737
AAGQSFSQGTTGR	13	O35927
AAGQYSTSYAQQK	13	XP_006522718.1
AAGSAQGSNQAPNSPSEGNSLLDQK	25	Q6AW69
AAGSGELGVTVK	12	Q80X90
AAGSIASAQKPPAGK	15	XP_006512018.1
AAGSIASAQKPPAGK	15	XP_006512023.1; XP_006512018.1
AAGSLLTDECR	11	XP_006526625.1
AAGTCGVLLR	10	Q9D773
AAGTDGPFQEVDGVASTR	18	XP_006502927.1
AAGTDGPFQEVDGVASTR	18	XP_006502939.1; XP_006502937.1; XP_006502934.1
AAGTDGSDFQHR	12	Q5XKN4
AAGTTVVEVEEIVDIGSFAPEDIHIPK	27	Q9D0K2
AAGVGPGASVGSNPR	15	NP_001269025.1
AAGVVLEMIR	10	Q9WTM5
AAGWSELSER	10	Q9CZL5
AAGYDLFSAYDYTISPMEK	19	Q8VCG1
AAHDESPGNNVVDISVPPTTDGQRPNK	27	P46638
AAHDLLDIEGEPALDCRPIQETTDSISSR	29	B1ARU1; XP_011238717.1
AAHIFFTDTCPEPLFSELGR	20	Q64324
AAHKQEPGLGFSFELTEQQK	20	P45952
AAHKQEPGLGFSFELTEQQKEFQATAR	27	P45952
AAHLCAEAALR	11	P50580
AAHLGANPWR	10	B2RR03
AAHLMDVAGNK	11	D3Z7X0
AAHLMDVAGNK	11	D3Z7X0; Q8K370
AAHPVPGSLDVCLITEAPLEEVIER	25	Q9D8I3
AAHSEGHITAGLDMK	15	P80314
AAHSIDTLGSASAR	14	A0A0R4J0I6
AAHVFFTDSCPDALFNELVK	20	O08599; O08599-2
AAHVLMPHESTVEHTHVDINEMESPLATR	29	E9Q9M1
AAIAAAAAAAAAK	13	Q9CR57
AAIANLCIGDLITAIDGEDTSSMTHLEAQNK	31	O70400
AAIAQALAGEVSVVPPSR	18	Q3UKJ7
AAIAVPSAPYDITCLESFR	19	Q62234-2
AAICSGK	7	IP_857122; IP_870788; IP_899467
AAIDAGYR	8	P21300; P45377
AAIDWFDGK	9	P56959; Q8BQ46
AAIDWFDGKEFHGNIIK	17	Q8BQ46
AAIDWFDGKEFSGNPIK	17	P56959
AAIDYQK	7	Q3THS6
AAIENYVLTYK	11	Q8BYI9
AAIGCGIVESILNWVK	16	Q01320
AAIGDTLVQDIR	12	XP_006514092.1
AAIGDTLVQDIR	12	XP_006514044.1; XP_006514092.1
AAIGFFITGGK	11	A2AKG8
AAIGLVPEVPK	11	I1E4X5
AAIISAEGDSK	11	P67778
AAILPTSIFLTNK	13	A0A0R4J049
AAILPTSIFLTNK	13	Q8CIG8
AAILPTSIFLTNKK	14	A0A0R4J049
AAILPTSIFLTNKK	14	Q8CIG8
AAILQTEVDALR	12	F8VPM7
AAILQTEVDALR	12	XP_017176821.1; XP_006518996.1
AAIQSQLDGVR	11	Q6KAR6
AAISDSVVEPAAK	13	Q62468
AAISQLR	7	Q6P9R2
AAISQPGISEDLEK	14	Q8BP40
AAITVEHLAIK	11	Q9JIK5
AAKDEVSESR	10	P08551
AAKDEVSESRR	11	P08551
AAKEEAERPEK	11	O08795-2
AAKEEAERPEKEAK	14	O08795-2
AAKEPDQPPCCEEPTAR	17	D0QMC3; P0DOV2
AAKLAPEFAK	10	O08709; Q8BG37
AALAAAGGAGGGGGGAGSR	19	XP_006516221.1
AALAAATVFLSMILSR	16	D3Z286
AALAAER	7	XP_006510036.1; XP_006510037.1
AALADVLR	8	XP_006525218.1
AALADYK	7	Q9D7P6
AALAELVALPCFFTLQPR	18	A0A0R4IZX5
AALAFGFLDLLK	12	Q8R3P6
AALAGGTTMIIDFAIPQK	18	Q9EQF5
AALAGGTTMIIDFAIPQKGSSLIEAFETWR	30	Q9EQF5
AALAGGTTMIIDHVVPEPESSLTEAYEK	28	E9PWE8
AALAGGTTMIIDHVVPEPGSSLLTSFEK	28	Q6P1J1; P97427
AALAGGTTMIIDHVVPEPGTSLLAAFDQWR	30	XP_006518571.1
AALAGGTTMILDHVFPDAGVSLLAAYEQWR	30	A0A0R4J1N0
AALAGYPR	8	Q61205
AALAHSEIATTQAASTK	17	Q9QXS1
AALAQAADCEVEQWNSDDPIPR	22	Q91Z53
AALAQAADCEVEQWNSDDPIPR	22	D6REG4; Q91Z53
AALAVGSPGPVGGSFAR	17	A0A0A0MQD5
AALCHFIVDELNAK	14	P28663
AALCTELK	8	Q3UNZ8
AALCYTASCQPGSCNGR	17	B1B507
AALDDRYHSDFSR	13	S4R1M2
AALDEQENQVQQLIELTEK	19	G3X987
AALDEQFEPQK	11	Q8VCC1
AALDGTPGMIGYGMAK	16	Q8BVI4
AALDLKDPNRPR	12	Q9JJC6
AALEALGSCLNNK	13	Q9CZN7
AALEALLGR	9	Q70IV5
AALEAQNALHNMK	13	XP_006498731.1
AALEAWPALQIAVENGFGGVHSQEK	25	H7BWY8
AALEELVR	8	Q61035
AALEEVYPDLTPEENRR	17	Q9DBR1
AALEGFLAALQGDPPQAER	19	A0A0R4IZZ1
AALEQDMAFWYGPHWQEIIPCTPATQHYVK	30	P14901
AALEQEKESQQLMR	14	XP_006513586.1
AALEQEKESQQLMR	14	XP_006513585.1
AALEQPCEGSLTRPK	15	P84086
AALESGVSTK	10	Q9WV34-2
AALESIAAPPPVK	13	XP_006537963.1
AALETDENLLLCAPTGAGK	19	XP_017174511.1
AALGQGVAPVHTQK	14	H3BL37
AALGYNILTQEEAQSVYDAK	20	Q8K182
AALHLYSNTLNFQISEVEPK	20	XP_017174063.1
AALHPPALAILSHTPDGATQTIAWVGK	27	XP_006499506.1
AALIMQVLQLTADQIAMLPPEQR	23	XP_006528541.1
AALIMQVLQLTADQIAMLPPEQR	23	XP_006528541.1; Q8C7E9
AALIQHMER	9	Q3UEG6
AALKVEESELK	11	Q9JHI9
AALLAELASLEADALR	16	Q3TW96
AALLDPFAAVR	11	B9EJR8
AALLDQIR	8	Q91YD9
AALLEAGMPESTEDK	15	Q6ZPJ3
AALLETLSLLLGK	13	E9PVA8
AALLEVFQEAHEQSVGMLHLTESINR	26	P25206
AALLGEELASAAGAR	15	Q8CGU1
AALLKHGLGNR	11	P10518
AALLLLLTFLAK	12	Q8VI75
AALLNAVLHSAYSEPFLLPHLK	22	Q8BJW5
AALLNFDEFAVSK	13	Q6P9Q4
AALLNQHYQVNFK	13	XP_006497180.1
AALLQAVR	8	A2AX52
AALLTGR	7	P50428; Q571E4
AALLTQQADSPEDREPQQK	19	Q80Y81
AALNAVR	7	P70441
AALNELLK	8	F8VPK0
AALPDLTK	8	Q91YW3
AALPQTTIHGAPAR	14	XP_017168469.1
AALPSHVVTMLDNFPTNLHPMSQLSAAITALNSESNFAR	39	Q9CZU6
AALQEEEQASK	11	E0CZ72
AALQEEEQASK	11	XP_006517600.1
AALQELLSK	9	P62852
AALQNTTLQSLGLTGGSATIR	21	Q8VBT9
AALRDYETVVK	11	Q60676
AALSGANVLTLIEK	14	A0A0R4J0I9
AALSGLLHR	9	Q99JY0
AALSGSYVNFGVFR	14	XP_006519422.1
AALSHDGILNLEAPR	15	Q99PR8
AALSSQQQQQLALLLQQFQALK	22	Q6Y7W8
AALSVDEVEKK	11	XP_006521998.1
AALTLTPSAVNK	12	I3ITR1
AALTQYSAK	9	XP_017170155.1
AALVGGTTMIIGHVLPDKETSLVEAYEK	28	Q9EQF6
AALYFQR	7	A0A0R4J1W7
AALYTWYVR	9	P22361
AAMEALQSQALHATSQQPLR	20	B1AQZ0
AAMEALQSQALHATSQQPLRK	21	B1AQZ0
AAMEALVVEVSK	12	E9QNN1
AAMEFHEHLHSIGTK	15	Q8K394
AAMEPIVISAK	11	P26039
AAMEVEAPSK	10	Q9D937
AAMFPETLDEGMQIPSTQFDAAHPTNVQR	29	Q02248
AAMFPLQVLGFEVDAVNSVQFSNHTGYAHWK	31	Q8K183
AAMGELYER	9	P19246
AAMILLER	8	Q8R1Q9
AAMLGQEDPPQHGLPR	16	P19096
AAMLLGSVGDALGYGNICR	19	A0A0N4SVK8
AAMMEPLIGFAHGQINFFK	19	Q8K3G9
AAMPPQIIQFPEDQK	15	B1B1A8
AAMPPQIIQFPEDQKVR	17	B1B1A8
AAMPTPGSTAGFR	13	Q8C0L8
AANAAENDFSVSQAEVSSR	19	XP_006524185.2
AANAASGAGGSSAAAGSRPGDGGSLGSGAR	30	XP_006511819.1
AANEAGYFNEEMAPIEVK	18	Q8BWT1
AANFENHSGR	10	XP_006518985.1
AANFVHMDTAQK	12	XP_006525606.1
AANGVVLATEK	11	P49722
AANGVVLATEKK	12	P49722
AANILVSDTLSCK	13	E9Q696
AANKTPPKSPGDPAR	15	Q7TQD2
AANLYASSPHSEFLDYVNAPIGK	23	Q8R0N6
AANNGALPPDLSYIVR	16	Q9D0M3
AANNISSLLTK	11	P97770
AANSLEAFIFETQDK	15	Q9JKR6
AANSLEAFIFETQDK	15	XP_006510025.1; Q9JKR6
AANVLEGVCGLQPGDR	16	XP_006507967.1
AANVLLSEHGEVK	13	XP_017171477.1
AANVLLSEQGDVK	13	Q99JT2
AANVLVSESLMCK	13	P25911; P25911-2
AANYDFYQLLEEK	13	Q8VE18
AAPAAAAAMAPPGPR	15	Q8BMF4
AAPAAYDASDTHLQILGKPVMER	23	O35969-2
AAPAPAAAPAAAPAAAPEPERPK	23	P09542
AAPAPAAAPAAAPAAAPEPERPKEAEFDASK	31	P09542
AAPCIYWLPLTESQIVQK	18	Q9JIX8
AAPDILIATPGR	12	XP_006499485.1
AAPDITGHKR	10	XP_017168713.1; P97300
AAPEESEAQAEGCSEER	17	Q9CRB2
AAPFNNWMEGAMEDLQDMFIVHSIEEIQSLITAHEQFK	38	Q9JI91
AAPFNNWMEGAMEDLQDTFIVHTIEEIQGLTTAHEQFK	38	XP_006515450.1; Q7TPR4
AAPFTLEYR	9	Q9D819
AAPGDRTMLDSLWAAAQEFQAWK	23	XP_006527004.1
AAPGGASPTIFSR	13	Q9D0S9
AAPGGASPTIFSR	13	XP_017175869.1
AAPGQQLPESLR	12	Q8R2H9
AAPGSGTSTFSFAPPSK	17	XP_006498008.1
AAPISCHVQVAHEK	14	A0A0J9YUI8
AAPISCHVQVAHEKEK	16	A0A0J9YUI8
AAPITQYLK	9	O89020-3
AAPLAGFGYGLPISR	15	Q922H2
AAPLIVEVFNK	11	Q8BHZ4
AAPLSLCALTAVDQSVLLLKPEAK	24	Q61838
AAPLSRDPTEVTAIGAVEASFK	22	XP_006501198.1
AAPPPPPIPTYGAALEQTLVK	21	Q8BIF2
AAPPPPPPPPPPLGADR	17	XP_006518770.1
AAPPQEDSQATETPDTGLYYHR	22	Q02819
AAPQLPMEELVSLSK	15	O89020-3
AAPQPLNLVSSVTLSK	16	XP_006505387.1
AAPSAEFSVDR	11	Q8VCC9
AAPSPAPAEPAAPK	14	Q9JLV1
AAPTEPPEAPEATAAGGVTSK	21	XP_006527004.1
AAPYWLDEPK	10	XP_011246314.1; XP_006529697.2; XP_017176391.1
AAQAGVAVGDWVLNIDGENAGSLTHIEAQNK	31	Q3TJD7
AAQAHEDIIHGSGK	14	P47199
AAQAPPLPAAPPNTDAVASTQTALLQK	27	P56873
AAQDFFSTCR	10	P70697
AAQDRDQIYR	10	P62996
AAQDSDLVKHEVDQELTDGFK	21	Q921T2
AAQEEYIK	8	A6ZI44
AAQEEYIKR	9	A6ZI44
AAQEEYIKR	9	A6ZI46; A6ZI44
AAQEQELESLR	11	Q9JIG7
AAQEREEELKR	11	F7AA26
AAQIFITELTLR	12	P70353
AAQIGAHTLSGACLDPAAFK	20	Q921G7
AAQINPLFPGQALLDTVPEIQALVR	25	A2ATU0
AAQIVFAQR	9	G3X987
AAQLAIR	7	P62911
AAQLATEIADIK	12	XP_006513585.1
AAQLCAAALAAVLSR	15	Q3TRM8
AAQLCGAGMAAVVEK	15	P17710
AAQLCGAGVAAVVEK	15	Q3TRM8
AAQLDGLEAR	10	Q61292
AAQLIGTCSQNVAAIQEQVLGLGALR	26	Q99P31
AAQLLDKDGTFLSTLEHFLSR	21	Q8VCM8
AAQLQGLSHFLR	12	Q80VQ0
AAQLSEELTQLR	12	XP_006503436.1
AAQNIIPASTGAAK	14	IP_1071877
AAQNISK	7	O35129
AAQNSGEAEYIEK	13	E9QN70
AAQPPTETAESSQAEEEKDAVDEAKPK	27	P06837
AAQPTDDPLSLLDPLWTLNKT	21	Q6PB44
AAQQAASSSGQGQQAQTPTGK	21	E9PWB2
AAQQQEDQEQKDEESEEK	18	Q61249
AAQQRPEEVR	10	Q99KK7
AAQSALATVFNLHLDQTPSR	20	XP_006513125.1
AAQSGVSQQPQAQQR	15	XP_011245494.1
AAQSNENLSDSQQEPTK	17	D3YWX2
AAQSPQQHSSGDPTEEESPV	20	P53986
AAQSQLSQGDLVVAIDGVNTDTMTHLEAQNK	31	Q9JKS4-6; Q9JKS4
AAQTAEDAMQIMEQMTK	17	XP_006530483.1
AAQTELGQQILADFEEAFPSQGTK	24	Q8CCB4
AAQTSDSEKIHLDEK	15	A0A1B0GR11
AAQTTIETAIHSLIETLK	18	XP_006504200.1
AAQVAQDEEIAR	12	XP_011244304.1
AAQVMGPPDR	10	Q3TIX6
AAQYQVNQAAAAQAAATAAAMGIPQAVLPPLPK	33	XP_006501837.1
AAQYRPLTVSVR	12	P49222
AASAAGASPAATPAAPESGTIPK	23	A2AL50
AASAAMYVPAR	11	D3YZU1
AASADSTTEGTPTDGFTVLSTK	22	Q9QZQ8
AASAEEQATIER	12	Q80X85
AASAFFTYVSLNQEGKPMPVPQLVPETEDEKKR	33	E9PYH2
AASAGVPYHGEVPVSLAR	18	XP_006531766.1
AASAMQGTSLAPAAYGDYTSVGVAK	25	Q60664
AASAQAPSSSPGNIRPVK	18	D3YWN7
AASAQAPSSSPGNIRPVKR	19	XP_006512640.1
AASAQAPSSSPGNIRPVKR	19	D3YWN7
AASASISSMSEGDEDEK	17	Q811Q9
AASAYAVGDVK	11	Q8K1M3
AASCLEGDRGR	11	Q9CQ60
AASDGQYENQSPEATSPR	18	XP_006495930.2
AASDGQYENQSPEATSPR	18	XP_017175345.1
AASDIAMTELPPTHPIR	17	P62259
AASDLQIAASTFTSFGK	17	Q9DC50
AASDLQIAASTFTSFGKK	18	Q9DC50
AASEFESAEGISLFPELR	18	Q9EPL2
AASENSQDAFR	11	XP_011242004.1
AASEWLLR	8	Q9CRA7
AASEYENEIR	10	Q3URD3
AASGAPLRPATVLGTMEMGR	20	Q8CG76
AASGFNATEDAQTLR	15	P97429
AASGFNATEDAQTLRK	16	P97429
AASGLLSIGLR	11	IP_971110
AASGLLSIGLR	11	Q8VCW8
AASGSALLWPR	11	XP_006515238.1
AASGSALLWPR	11	Q9DB29
AASGTKEDPNLVPSISNK	18	Q9D881
AASGTKEDPNLVPSISNKR	19	Q9D881
AASGYASSLLPSAGPRPEVEALDASLEELLAK	32	Q8VED2
AASHEQAAAALK	12	XP_017172355.1
AASHEQAAAALK	12	XP_006521824.1
AASIFGGAKPVDTAAR	16	Q8BGD9
AASIQNTVQNLR	12	Q8BUH8
AASISAVSLEVAQPGPSSGPR	21	E9PZ16
AASISAVSLEVAQPGPSSGPR	21	XP_006538636.1
AASITSEVFNK	11	G3X956
AASLEAVSYAIDSLK	15	A0A0R4J206
AASLGLLQFPILNASVDENCQNITYK	26	P53395
AASLHWTSER	10	Q9CXV1
AASLLEHHASQLCQHVNR	18	Q9JIG7
AASLSGDCSLVNELFR	16	G3UW46
AASPAKPSSLDLVPNLPR	18	Q8CC35
AASPEHNCVR	10	XP_006507967.1
AASQPGELKDWFVGR	15	Q00493
AASQTDKPADRKEDESQTEDPSTSPSPGTR	30	XP_006515533.1
AASSCFLMACEKPGKK	16	Q921H9
AASSEAAPHHQPPPESR	17	XP_011236945.1
AASTYSLDILYSGSGILR	18	O08601
AASVAENCINYQQGTPHK	18	P70202
AASVIPGSASRPTPVRPSLSAR	22	Q8VBY2
AASVPALADLVK	12	XP_006508582.1
AASVRPVLEIYSASGLPLASLLWK	24	XP_017174832.1
AASWLTHQGSFHGAFR	16	XP_006523594.1
AASYFFDGSSYAVVR	15	P97927
AATADLEQYDR	11	P81117
AATAIYR	7	Q64012-2
AATALKDVVK	10	Q922R8
AATAPLLEAVDNLSAFASNPEFSSVPAQISPEGR	34	P26039
AATECMCNLAMSK	13	Q99KD5
AATFFGCIGIDK	12	P55264
AATFGLILDDVSLTHLTFGK	20	P67778
AATFGLILDDVSLTHLTFGKEFTEAVEAK	29	P67778
AATGAISAVFGR	12	XP_006504846.1
AATGEEVSAEDLGGADLHCR	20	Q3ULD5
AATGPFDREHLLMYLEK	17	Q9JKK7
AATHGLILGALQEDGPLPGELAQLR	25	A0A0R4J0B5
AATIIATSEGSLWGLDR	17	Q8K1M3
AATITATSPGALWGLDR	17	P31324
AATMSAVEAATCR	13	Q9DCC4
AATQFWR	7	A0A0R4J0Z1
AATSPALFNR	10	Q9JHU4
AATTGHVIDIYACALDQTGLLEMK	24	Q01405
AATTSNPSK	9	P50462
AATTSNPSKFSAK	13	P50462
AATVMLAAGWTHSSPAGFR	19	P11930
AAVAAGCR	8	Q9CPY7
AAVAGEDGR	9	Q9Z204
AAVAGEDGR	9	Q9Z204-2; Q9Z204-3
AAVAGEDGR	9	Q9Z204; Q9Z204-5
AAVAIQSQFR	10	D3YXH0
AAVALDFDYER	11	O88307
AAVAPVTWSVISLLR	15	Q8VEC4
AAVASLLQSVQVPEFTPK	18	NP_033483.2
AAVATTQGEQEAAETCR	17	J3QK52
AAVAVPNRPPDAVLR	15	P51660
AAVAWEAGKPLSIEEIEVAPPK	22	P28474
AAVDAGFVPNDMQVGQTGK	19	Q99LC5
AAVEDPR	7	Q9D2G2
AAVEEGIVLGGGCALLR	17	P63038
AAVEEGIVLGGGCALLR	17	IP_1121048; P63038
AAVEEGIVLGGGCALLRCIPALDSLKPANEDQK	33	IP_1121048; P63038
AAVEELLR	8	A0A0R4J0M1
AAVELALLGAR	11	XP_006512633.1
AAVELEEPEDAR	12	Q91YR7
AAVENLPTFLVELSR	15	P70168
AAVEQLTEEQK	11	P19123
AAVEQLTEEQKNEFK	15	P19123
AAVEQVPVEPYK	12	Q6P3A8
AAVEQVPVEPYKIPLSQAEVIQEGSDVTLVAWGTQVHVIR	40	Q6P3A8
AAVESLGFILFR	12	Q3TXS7
AAVEWFDGK	9	XP_006514571.1
AAVEWFDGKDFQGSK	15	XP_006514571.1
AAVFNHFISDGVK	13	P01027
AAVFNHFISDGVKK	14	P01027
AAVGKEEIQER	11	P08032
AAVGTACGLALGNYNDLYHWSVR	23	Q9D2R0
AAVGVTGNDITTPPNKEPPPSPEKK	25	XP_006512023.1; XP_006512018.1
AAVHLEGK	8	XP_006518985.1
AAVHYDR	7	O08583
AAVIAVTR	8	XP_006501198.1
AAVIGDVIR	9	Q9JIK5
AAVIGLTK	8	G3UWD3
AAVLDLEK	8	XP_006513586.1
AAVLGESAGLVR	12	F8WJ05
AAVLQELATHLHPAEPDEGDSDATR	25	D3YXJ5
AAVLWELHKPFTIEDIEVAPPK	22	P00329
AAVMATLLFPGQEFK	15	Q9WVQ5
AAVMVHQLSK	10	Q02248
AAVPDAVGK	9	Q8VDN2
AAVPDAVGK	9	Q8VDN2; XP_011248820.1; Q6PIE5
AAVPSGASTGIYEALELR	18	P17182; P17183; XP_006532224.1
AAVPSGASTGIYEALELR	18	P17182; P17183; XP_017175442.1; XP_006532224.1
AAVPSGASTGIYEALELRDGDK	22	P17183; XP_006532224.1
AAVPSGASTGIYEALELRDGDKAR	24	XP_006532224.1
AAVPSGASTGIYEALELRDGDKQR	24	P17183
AAVPSGASTGIYEALELRDNDK	22	P17182
AAVPSGASTGIYEALELRDNDK	22	P17182; XP_017175442.1
AAVPSGASTGIYEALELRDNDKTR	24	P17182
AAVPSGASTGIYEALELRDNDKTR	24	P17182; XP_017175442.1
AAVQCLQALR	10	G3X9B1
AAVQQLQAEGLSPR	14	Q8K354
AAVQVLDDIEK	11	P16332
AAVRPDGDSAPGPVPR	16	P58468
AAVSAPLSHHR	11	G5E8J6
AAVSCLWGK	9	P02088
AAVSCLWGKVNSDEVGGEALGR	22	P02088
AAVSCLWGKVNSDEVGGEALGRLLVVYPWTQR	32	P02088
AAVSEQPQTTGGSQATTR	18	P57016
AAVVESHK	8	P47791
AAVVTSPPPTTAPHK	15	XP_006503734.1
AAWEAYLSR	9	P13439
AAWEVDSGR	9	P45952
AAWEVDSGRR	10	P45952
AAWGEETDYTPVWCMR	16	P70697
AAWGKIGGHGAEYGAEALER	20	P01942
AAWPHFSWLLSQSER	15	Q8QZW3
AAWWPEFSANK	11	Q9EPL9
AAYAHFLNVQGR	12	Q8CAK1
AAYDAFNSWK	10	Q8BWF0
AAYDVSSFSFFQR	13	Q9CQW1
AAYEAELGDAR	11	P48678
AAYEAELGDARK	12	P48678
AAYFGIYDTAK	11	P51881
AAYFGVYDTAK	11	P48962
AAYHPEFPTVLTALEIDNAVVANSLIDMR	29	Q924W5
AAYIYIR	7	Q91YT0
AAYLDDLR	8	Q9JHK4
AAYLLGCSLEELSSAIFK	18	XP_006533660.1
AAYLNMSEDPSHPSMALNTR	20	XP_006505343.1
AAYLQENGKPLDEVLR	16	P10107
AAYNLVR	7	Q9CQI6
AAYNLVRDDGSAVIWVTFR	19	Q9CQI6
AAYPDLENPPLIVTPSQQPK	20	Q9D0I9
AAYQVAALPR	10	P52760
AAYSGHIDVVR	11	Q8VE42
AAYVLFYQR	9	XP_006511759.1; Q8R5H1
AAYVLFYQR	9	XP_006511759.1; Q8R5H1; XP_017173957.1
ACACAHGMLAEDGASCR	17	A0A0R4J0I9
ACADATLSQITNNIDPVGR	19	P62874
ACADGGANHLYDLTEGER	18	Q9R0M5
ACAEALGSLK	10	P56873
ACAELHQNVNVK	12	Q9EQH3
ACAEQDGILASAEQLHAAWR	20	Q80WM4
ACALQEGLR	9	Q91XD4
ACALSIAESCRPGDK	15	Q8K2B3
ACALSIAESCRPGDKVPSIK	20	Q8K2B3
ACASTGVIMSVNNSLYLGPILK	22	Q07417
ACCVPTKLDPISILYLDK	18	Q9R229
ACDEGHIIPK	10	Q9JHI5
ACDGNVDHAATHISNR	16	A0A0G2JGQ4
ACDLGHVWACANASR	15	Q921H9
ACDLPAWVHFPDTER	15	XP_017170618.1
ACDLWEQILR	10	A3KMP2
ACEFAGFQCQIQFGPHNEQK	20	P26039
ACEQPLGYICK	11	Q61830
ACFGGLFANLIRPGDAK	17	XP_006523581.1
ACFHCETCK	9	Q61792
ACFLSETVK	9	Q91YP0
ACFTMDPK	8	Q9Z1Q9
ACGANLPENFSISQIFSQAMAAR	23	P34914
ACGDSTLTQITAGLDPVGR	19	E9QKR0
ACGEFVFLMDR	11	Q99KC8
ACGEGFCDSCSSK	13	Q810J8
ACGLFAASHNEDFPFHAEY	19	G5E895
ACGLIIFR	8	P56380
ACGLNFADLMGR	12	Q62465
ACGLNFIDLMVR	12	Q80TB8
ACGLPSGSCR	10	Q8BU85
ACGNFGIPCELR	12	Q9DCL9
ACGPDYYEVEEDGIR	15	Q01279
ACGPDYYEVEEDGIRK	16	Q01279
ACGVDFEIR	9	Q91YI4-2
ACGVDYEVK	9	XP_006507262.1
ACGVSRPVIACSVTIK	16	Q9D0T1
ACHILECPEGLAQDVISTIGQAFELR	26	P98083
ACHPYFPLQDIVVSPPLDSLTLER	24	Q91X34
ACHQLHQEGK	10	Q8CG76
ACIESR	6	Q99K67
ACIKYPEWK	9	E9PVP0
ACIPFLK	7	Q2TPA8
ACIPQSFTVDSSK	13	Q80X90
ACISIGNQNFEVK	13	XP_011247336.1
ACKDPNPIIDGR	12	Q62176
ACLIFFDEIDAIGGAR	16	Q8BVQ9
ACLISLGYDIGNDPQGEAEFAR	22	Q7TPR4
ACLISLGYDVENDR	14	XP_006540320.1
ACLISLGYDVENDR	14	P57780
ACLISLGYDVENDRQGDAEFNR	22	P57780
ACLISMGYDLGEAEFAR	17	Q9JI91
ACLISMGYNMGEAEFAR	17	XP_006515450.1
ACLLAAALGTTGER	14	Q8BNW9
ACLLCSLVK	9	P63271
ACLNFLK	7	Q9CXG3
ACLVTTVTSSGPSQSTIK	18	G5E8J3
ACLYAGVK	8	P15105
ACLYAGVK	8	IP_1121553; P15105
ACNCLLLK	8	P17183; XP_006532224.1
ACNGVNDCGDQSDELCCK	18	Q61129
ACNQLGQFLQHR	12	XP_006536217.1; P17426
ACNQLGQFLQHR	12	XP_006536217.1; P17427; P17426
ACPCASSSQVLQELLSR	17	Q8BYI9
ACPLLANDNILHHLPK	16	Q99PG0
ACPRPEGLNFQDLR	14	Q3TE40
ACQGMSAVIHTAAAIDPLGAASR	23	Q61694
ACQIAHDHTDHVIR	14	Q64462
ACQLSVVVDDKK	12	XP_006510051.1
ACQPPFAFR	9	P11835
ACQSIYPLHDVFVR	14	P97351
ACSAIHAVNLR	11	NP_001289136.1; Q9JJ28
ACSTGEFSCANGR	13	A2ARV4
ACTELGIR	8	E9QPD7
ACTGSLNMTLQR	12	XP_006501801.1
ACTGSLNMTLQR	12	XP_006501807.1; E9Q8P5
ACTILLR	7	P80318
ACTTEEDQEKLMQITSLHSLNAFLLPIK	28	XP_011238380.1
ACVAGTSDAEAVK	13	F8VQC7
ACVDSNENGDLSK	13	Q64514-2
ACVEAPGGNPICSLHDQGAGGNGNVLK	27	Q5SUR0
ACVGLPPQNHMLLEHK	16	Q9JHU9
ACVVAGLR	8	Q9DB60
ACVVHGSDLKDMTSEELDDILR	22	Q8VDN2
ACYGVLR	7	P62908
ACYLSINPQKDEALETEK	18	Q8R5C5
ACYLSINPQKDETLETEK	18	P61164
ADAAEFWR	8	P22682
ADAATSFLR	9	XP_006509052.1
ADAEDLLGSFLSNILQDCR	19	Q9D071
ADAEEEAATR	10	NP_001185801.1
ADAEEEAATRIPA	13	NP_001185801.1
ADAEGESDLENSR	13	P26039
ADAEGESDLENSR	13	XP_006537833.1
ADAEGESDLENSRK	14	P26039
ADAEGESDLENSRK	14	XP_006537833.1
ADAELDDPESEDMER	15	XP_017168985.1
ADAEVITFPK	10	F6YUI5
ADAEVLR	7	P48036
ADAGFVYSEAVASHYMR	17	XP_011245733.1
ADAGGELNLAR	11	Q9QYR9
ADALQAGASQFETSAAK	17	B0QZN5
ADAMTLDGGTMFDAGKPPYK	20	P08071
ADANLLTDTGTESSPR	16	Q9CRA8
ADAQTPEEVGPSEASLR	17	Q8VE99
ADASSLTVDVTSPASK	16	Q99JX3
ADATNVNNWHWTER	14	Q8BK64
ADAVHLFSGSQFESSR	16	Q9R1V6-12
ADAVQDSEMVELVELEIR	18	Q8BFR5
ADAVQEATFQVELPR	15	A6X935
ADAYFSPIHSQLEHLLDPSSFTGR	24	P54822
ADCASGIFLAAEK	13	Q8CBB7
ADCGCTYQLR	10	Q9QZN4
ADCKEEHDIPR	11	Q91VM9
ADCLVPSEIRK	11	Q9Z2Q6
ADCPFTHMSR	10	Q8BJ05
ADCTITMADSDLLALMTGK	19	P32020
ADDADEFGYSR	11	Q78PY7
ADDASAATIEK	11	Q923D5
ADDGRPFPQVIK	12	A6ZI44
ADDGRPFPQVIK	12	A6ZI46; A6ZI44
ADDILANPPR	10	E9QPX1
ADDKIYFGGLPTLR	14	Q60675
ADDKLISEEGVDSLTVK	17	Q9Z2I0
ADDKVLPGQQYVYVLHANEPSPGEGDSNCVTR	32	E9PZD8
ADDLLPLGDQTQDGDFGSR	19	Q9Z315
ADDPNSIFLIDHAWTCR	17	Q3UDE2
ADDPSSYMEVVQAANASGNWEELVK	25	XP_006534046.1
ADDPTMGEGPDK	12	O08599-2
ADDPTMGEGPDK	12	O08599; O08599-2
ADDPTMGEGPDKAR	14	O08599; O08599-2
ADDTFEALR	9	P62869
ADDVVWVR	8	Q922B2
ADDYFLLR	8	Q8R0F9
ADEAALDHPYLK	12	Q63829
ADEAYLIGR	9	E9QPD7
ADEDPIMGFHQMFLLK	16	P61971
ADEFIR	6	Q5EBG8
ADEGISFR	8	P35700
ADETKDEQFEEYVQNFK	17	A0A0G2JEG8
ADETKDEQFEEYVQNFKR	18	A0A0G2JEG8
ADETKDEQFEQCVQNFNK	18	XP_006526041.1; XP_006526043.1
ADETVQTSDGSISAQHSSASLQDSVNASR	29	XP_006499773.1
ADEVLEILK	9	XP_017174511.1
ADEVTLSEAGSTAGPAEPR	19	Q9Z0P4
ADEWLMK	7	Q3UH59; Q8VDD5
ADFAQACQDAGVR	13	E9QPD7
ADFCIIHYAGK	11	Q3UH59; Q8VDD5
ADFDNTVAIHPTSSEELVTLR	21	P47791
ADFGFTVNK	9	Q99LB7
ADFILSYHPPIFRPMK	16	Q9EQ80
ADFPAGIPECGTDALR	16	Q9Z1Q9
ADFPDNILIASIMCSYNK	18	Q8CHR6
ADFQCFQQAR	10	O35206
ADFQELGAK	9	A6H6E2
ADFQGISPER	10	P61804
ADFSEAYK	8	P16330
ADFSEAYKR	9	P16330
ADFSNEK	7	P56375
ADFSPESPDLDLR	13	F6QM56
ADFSPESPDLDLR	13	XP_017177593.1
ADFSQADVHR	10	Q04863
ADGDNAGTAGTPGGTPAADK	20	XP_006534615.2
ADGEYWLGLQNLHLLTLK	18	Q9D1H9
ADGFVNLSDFTVER	14	XP_017169456.1
ADGIGSSPLSNQDAFR	16	A0A0R4IZX1
ADGIVPETWTDGPKDTSVEDALER	24	Q9CQ06
ADGLAILGVLMK	12	P13634
ADGLDIPQLLEAVLR	15	NP_001273146.1
ADGLDIPQLLEAVLR	15	XP_011248157.1
ADGQALGDSHLR	12	Q9CW46
ADGSSLPEWVTDNAGTLHFAR	21	XP_006524986.1
ADGSTQVIDTK	11	O08749
ADGTPWPAVGIGR	13	Q8CHR6
ADGTRYMMLIDGTNEVFMIDR	21	O55236
ADGTVLECSESSNADVFQAAR	21	P58710
ADGTVTLVLPR	11	Q8BWY4
ADGYEPPVQESV	12	P97351
ADGYVLEGK	9	P62242
ADGYVLEGKELEFYLR	16	P62242
ADHADEIPFVFASFFWGMK	19	Q91WG0
ADHASENSFVFGGPFLTDESSLLAFPEATEEEK	33	Q8VCU1
ADHDFVVQEDFMK	13	P62334
ADHGDDVAFVFGSYLWDMNLDLTEEEELLKR	31	Q8QZR3
ADHGDEIFLVFGYQFGNIK	19	Q8BK48
ADHGEPIGR	9	P11499
ADHQPLTEASYVNLPTIALCNTDSPLR	27	P14206
ADHSSENAFVFGGPFLTDESSLLAFPEATEEEK	33	Q63880
ADIAESQVNK	10	XP_006518741.1; Q5SX40; P13541; B1AR69; Q91Z83
ADIALVELLYHVEELDPGVVDNFPLLK	27	P30115
ADIDLTKR	8	A0A1Y7VKY1
ADIDVSGPK	9	XP_017173761.1
ADIDVSGPKVDIDVPDVNIEGPEGK	25	E9Q616
ADIEEIR	7	P81117
ADIEMPFDPSK	11	Q80X90
ADIFMFDEPSSYLDVK	16	P61222
ADIFVDPVLHTACALDIK	18	Q61543
ADIGAPSGFK	10	P70315
ADIGTPSNFQHIGHVGWDPNTGFDLNNLDPELK	33	Q91YD9
ADIGVAMGIAGSDVSK	16	XP_011248820.1
ADIGVAMGIVGSDVSK	16	Q8VDN2
ADIHLLICTIDDLIDK	16	Q6PE15
ADIINVVNGPITYSPDILPMVGPHQGVR	28	Q9DBT9
ADILDQMR	8	Q8R3P0
ADILEDKDGK	10	Q9D0E1
ADILQVGLR	9	F6Y616
ADINEENEETITK	13	A0A0R4J0K5
ADIPVVICDTPQK	13	Q8JZR0
ADIQDIFYQEDQIR	14	Q8VE22
ADISGNITK	9	Q9JL62
ADIVENQVMDTR	12	P10649
ADIVHAFLSIPSLSHSVLSQTSFR	24	XP_017177814.1
ADIWLVR	7	Q8R084
ADIWSFGITAIELATGAAPYHK	22	Q6P9R2
ADIWSLGITAIELAK	15	XP_017171477.1
ADIWSLGITAIELAK	15	Q99JT2; XP_017171477.1
ADKDYHFKVDNDENEHQLSLR	21	Q61937
ADKLAEEHGS	10	P56480
ADKNQVAAEVAK	12	E9QB02
ADKQHVLDMLFSAFEK	16	Q8R0A0
ADKQSVHLVENEIQASIEQIFSHLER	26	O35166
ADKYGPGPMGPK	12	O88737
ADLAAQYTTIGR	12	Q9EQ08
ADLAEEYSK	9	P68037
ADLAEEYSKDR	11	P68037
ADLASKR	7	P35278
ADLDQLR	7	Q9Z329
ADLDVSGPK	9	E9Q616
ADLEAQR	7	Q91V41
ADLECTKPAAR	11	P01027
ADLEMQIESLKEELAYLKK	19	Q61781
ADLEPESFRPNLSDPSELLLPDQIEK	26	Q4KMM3
ADLFPILMR	9	E9QK83
ADLIAYLK	8	P62897
ADLIAYLKK	9	P62897
ADLIFVVFDPTK	12	XP_006521750.1
ADLINNLGTIAK	12	P07901; P11499
ADLKDVQNAK	10	S4R1S4
ADLLGIVSELQLK	13	Q8K3K8
ADLLTTEEILTLAR	14	Q5RKZ7
ADLMDR	6	Q8VEK3
ADLNQGIGEPQSPSR	15	Q8C845
ADLPDQR	7	Q99P58
ADLPEIFIASYK	12	Q9WUR0
ADLPGSSSTFTK	12	XP_017168172.1
ADLPGSSSTFTK	12	XP_011240504.1; XP_011240500.1
ADLPGSSSTFTK	12	XP_011240504.1; XP_006509438.1
ADLPTGATTSAPVMLR	16	XP_006499112.1
ADLPTLGFTHFQPAQLTTVGK	21	P54822
ADLQGSASPSKVEGTHTPR	19	Q8K212
ADLQNHLDTAQHALQDK	17	XP_006513585.1
ADLQNHLDTAQHALQDK	17	XP_006513586.1
ADLSGMSPER	10	O08797
ADLSHKEEGDDDQAR	15	E9QPB3
ADLTAEMISAPLGDFR	16	XP_006533878.1
ADLTALFLPR	10	Q9JJ28
ADLTALFLPR	10	NP_001289136.1; Q9JJ28
ADLYLEGK	8	Q8BIJ6
ADLYTVESK	9	Q9JHW2
ADMDQFTSSISENPVDVR	18	XP_006510014.1
ADMEDLMSSKDDVGK	15	Q3UH59
ADMGGAATICSAIVSAAK	18	Q9CPY7
ADMTASGSPDYGQPHK	16	P26323
ADMTDEEFMR	10	O88737
ADMTDEEFMRR	11	O88737
ADMVETQQLMR	11	Q8BH64
ADMVIEAVFEDLGVK	15	Q8BMS1
ADNCHSHPAVFSEILR	16	B1ARB3
ADNDKEYLVLTLTK	14	O08586
ADNEKLEEQPGEQAPR	16	Q3UMU9-3
ADNFEYSDPVDGSISK	16	Q9D0F9
ADNLATQMLMR	11	XP_006521750.1
ADNLIPGTR	9	Q9JHU9
ADNSATGFGTGTR	13	P97449
ADPDGDGVLSLQEFSNMDLR	20	Q8BG58
ADPDQMIEVPNNIIR	15	D0QMC3
ADPEAAWEPTEAEAR	15	Q9Z1F9
ADPEELFTK	9	XP_017171477.1
ADPEELFTKLEK	12	XP_017171477.1
ADPLAASTANLSLLLQHPPLPAYTIQGQYAIPHPDQLTK	39	XP_011241818.1
ADPLGLEAEK	10	Q8R0Y6
ADPLGLEAEKDGVPVFK	17	Q8R0Y6
ADPLGLEAEKDGVPVFKFPR	20	Q8R0Y6
ADPQEAINCLMR	12	Q9DB05
ADPSLNPEQLK	11	XP_011243935.1
ADPSLNPEQLKK	12	XP_011243935.1
ADPSQFELLK	10	F6Q8A4
ADPTVQLAPSPPK	13	XP_006503645.2
ADPYTADEGSGEGHK	15	XP_006508336.1
ADPYVEITGTAGK	13	F8WJE0
ADPYVEITGTAGKK	14	F8WJE0
ADQCYEDVR	9	O89053
ADQDRLDLEER	11	Q9CU62
ADQELLMYSHDNIICGITSVAFSR	24	E9QKR0
ADQELMTYSHDNIICGITSVSFSK	24	P62874
ADQFEYVMYGK	11	Q923G2
ADQGLDFAATK	11	XP_017174658.1; P20357
ADQIETQQLMR	11	Q9WVK4
ADQIETQQLMR	11	Q9QXY6; Q9WVK4
ADQLADESLESTRR	14	P60879
ADQLCQQELR	10	G3X981
ADQVDTQQLMR	11	Q9EQP2
ADQWNVNYVETSAK	14	P63321
ADRDDYVIIVWDR	13	Q61847-2
ADRDESSPYAAMLAAQDVAQR	21	P62264
ADRDQYELLCLDNTR	15	Q921I1
ADRDQYELLCLDNTR	15	Q921I1; E9Q035
ADREVAIYSK	10	P62881
ADRPSFYTIYVEEPDSAGHSSGPVSAGVIK	30	Q6DYE8
ADRRQSFASLALR	13	XP_011241605.1
ADSCEFTVTGLQK	13	A2ASS6
ADSHFR	6	XP_006505761.1
ADSHGELDLAR	11	Q8BWN8; O55137
ADSHGELDLAR	11	Q8BWN8; O55137; Q9QYR7
ADSLDLSELAK	11	XP_006530396.1
ADSLFPVVSAASIFAK	16	Q9CWY8
ADSLQDEINFLK	12	Q9DCV7
ADSQFLVEIMEINER	15	Q8K3A0
ADSQFLVEIMEINER	15	A0A0R4J0T0
ADSSLDLSELAK	12	XP_006530399.1
ADSSNDEAVADTSR	14	P97927
ADSSSVLPSPLSISTK	16	Q5SVR0
ADSVAGAIQSDPAEGSQESHGR	22	P80560
ADSVAWAR	8	Q9DBX3
ADSVAWNPHK	10	Q9DBE0
ADSVVVLLCR	10	Q9EPU0
ADSWVEKEEPTPSN	14	Q8VDP4
ADTAAQALCAQCAEK	15	P59729
ADTAWNAVLLR	11	Q8R059
ADTDDAPVPAPAGDQK	16	Q02819
ADTDDAPVPAPAGDQKDVPASEK	23	Q02819
ADTFQGLK	8	XP_006529146.1
ADTIAKNELHK	11	XP_011247832.1
ADTIDTIEK	9	Q8R5H1
ADTLDLPEELPGVKPFTR	18	P16332
ADTLDPALLRPGR	13	P54775
ADTLLKPDQR	10	A2ASS6
ADTLTLEER	9	Q80UG5
ADTLTLK	7	XP_011246236.1
ADTLTPEECQQFK	13	E9Q1G8
ADTLTPEECQQFKK	14	E9Q1G8
ADTLTPPEVDR	11	XP_006532556.1
ADTMTLEEK	9	XP_017172096.1
ADTNLGNILLNVLIAPNMPCTR	22	Q9JIH2
ADTPSLGEGPEK	12	Q64324
ADTSLTSSTSSGR	13	E9Q1U2
ADTTTGSIAGAPEDER	16	XP_006498485.1
ADTVGLACEAINR	13	G3X922
ADTVNQILHAFDDSKEYVAAQLGQLPAQLLK	31	XP_006524219.1
ADVAFHFNPR	10	A8DIL0
ADVDAATLAR	10	P31001
ADVDISVPK	9	E9Q616
ADVDLIVQDLK	11	Q9JLI6
ADVDLYQVR	9	Q9CR00
ADVDVQPYAFTTK	13	Q99ME9
ADVESQFPDWIR	12	Q8BJS4
ADVFHAYLSLLK	12	Q6ZQ38
ADVGFAMGIAGTDVAK	16	XP_006514078.1; XP_011246340.1
ADVGGEAAGTAINHSHMLLQR	21	XP_017170266.1
ADVIITSGGVSMGEK	15	XP_006515964.1
ADVIITSGGVSMGEK	15	XP_006515962.1
ADVIITSGGVSMGEKDYLK	19	XP_006515962.1
ADVIPVHYYLIPPPTK	16	Q64514-2
ADVIQATGDAICIFR	15	Q08943-2
ADVLFVAPR	9	P57716
ADVLLEPFR	9	O09174
ADVPLPLDLLPSFWK	15	XP_006530414.1
ADVQSIIGLQR	11	Q62318
ADVTQETDPLCAECR	15	Q149F1
ADVVANDAGDR	11	Q99M31-2
ADVVESWIGEK	11	XP_006497875.1; XP_006497872.1; P08032
ADVVESWIGEK	11	XP_006497873.1; XP_006497875.1; P08032
ADVVESWIGEKENSLK	16	XP_006497875.1; XP_006497872.1
ADVVETLLQTDQSLTEAAKEVEEER	25	Q9Z0E6
ADVVISAFGSVLEDPK	16	Q8CHR6
ADVVMSMATDDFVK	14	Q2TPA8
ADWLTHYWMPK	11	Q61024
ADWSSLSR	8	NP_034071.2
ADWSSLSRDEK	11	NP_034071.2
ADYAQLLEDMQNAFR	15	P50516
ADYDREALLGVQEDVDEYVK	20	Q8BP92
ADYEIASK	8	Q9CYI4; Q7TNC4
ADYNLTR	7	Q9Z1Q9
ADYSLILQR	9	A2AQ43
ADYVREMLTTQAER	14	XP_006530249.1
AEAAAPYTVLAQSAPR	16	Q8K4G1
AEAADLMSLKPK	12	NP_001303662.1
AEAAEQAALAANQESNIAR	19	Q9ET78
AEACFVNCVER	11	Q9WVA2
AEADRIVFENPDPSDGFVLIPDLK	24	Q9DAR7
AEADVASLNR	10	XP_006511108.1
AEADVASLNR	10	E9Q448
AEADVASLNRR	11	XP_006511108.1
AEADVASLNRR	11	E9Q448
AEAEALYQTK	10	Q3UV17
AEAEAQAEELSFPR	14	E9QPD7
AEAEAWYQTK	10	Q9DCV7
AEAEIELLQHLLR	13	A2AL36
AEAEKAEEELEEDDDDELDETLSER	25	Q9CPQ3
AEAELGTFPR	10	Q8VED2
AEAENNSGVESSGYGSPGPTWDR	23	E9QNN1
AEAERDVLFPGYTHLQR	17	Q91YI0
AEAESWYQTK	10	P50446; Q8VED5
AEAETLPSLPITK	13	O88428
AEAETMYQIK	10	P11679
AEAETMYQIKYEELQTLAGK	20	P11679
AEAEWFKENEPLSTK	15	A2ASS6
AEAGAGSATEFQFR	14	XP_011244881.1
AEAGDNLGALVR	12	ENSMUSP00000091180.2
AEAGDNLGALVR	12	Q8BFR5
AEAGEGQKPSPAQLELR	17	Q8K183
AEAGGGWEGSASYK	14	P97765
AEALASAIASTK	12	Q9D7A8
AEALPAASVSQTHESK	16	Q6PGL7
AEAMQEASEAVPSGMLSVLGQR	22	Q8R3F5
AEAPGTVSSAAEGPKDPPVLPR	22	Q8R1N4
AEAQANQISLPR	12	Q8K2Q0
AEAQEAEDQQAR	12	Q9QXV0
AEASPIIQPAPATK	14	A2AI52
AEASQLGHK	9	P26039
AEASSNDIAGAR	12	XP_011248998.1
AEATASALADADADLEER	18	XP_011248992.1
AEATTLHAAPQGAAMAVSTFR	21	Q8VCG4
AEAVATVVAAVDQAR	15	A2ASS6; A2ASS6-3
AEAVESAQAGDR	12	P97311
AEAVPEEEAAASVATLER	18	Q6R891
AEAVQSFLAFIQHLR	15	O08601-2
AEAVQSFLAFIQHLR	15	O08601
AECLNPAQPGR	11	P10493
AECLNPAQPGRR	12	P10493
AECMLQQAER	10	Q61233
AECPELSADLRPR	13	Q8BWP5
AECRPAASENYMK	13	Q8R0A0
AECSAEQCYK	10	P06801
AEDAVEAIR	9	F7BGR7
AEDDQPLPGVLLSLSGGVFR	20	Q6GQT9
AEDEGSTEEGGKADEDKSDAEGKPAR	26	Q8CCT4
AEDEHLGILGPPIHANVGDK	20	E9PZD8
AEDFIVDVINVDYGMEDKNPIDR	23	F8WJE0
AEDGAAPSPSSETPK	15	P26645
AEDGAAPSPSSETPKK	16	P26645
AEDGASLR	8	Q8VCG1
AEDGENYAIKK	11	P48428
AEDGIVLDFPVYPTFPQDFHEVEDLIK	27	XP_006514092.1
AEDGSVIDYELIDQDAR	17	P07356
AEDKEWIPVTK	11	P25444
AEDKEWIPVTK	11	ENSMUSP00000136275.1; P25444
AEDLCHTMKEKLEEEENLTR	20	Q8R4U7
AEDLNIAPR	9	Q6PDY2
AEDLPLR	7	Q3U7R1
AEDLPQMDDAVMDNVK	16	XP_006506230.1
AEDLSATVTDVVEGQEYSFR	20	A2ASS6
AEDNADTLALVFEAPNQEK	19	P17918
AEDSATYYCAR	11	A0A075B5R2
AEDSGAEQLASEIEPSREESWVSIK	25	Q9WTQ5
AEDSGEYHCVYHFVSAPK	18	P97300
AEDSGEYHCVYHFVSAPK	18	XP_017168713.1; P97300
AEDSLLAADETAAK	14	F8WID5; E9Q448
AEDTEHVVIPVCLR	14	Q8R5H1
AEDTGIYYCTR	11	A0A075B5T3
AEDTISILPDDPR	13	Q6DG52
AEDVSAIEIVGGATR	15	Q61699
AEDYPIDLYYLMDLSYSMKDDLENVK	26	P09055
AEEAGIGDTPNQEDQAAGHVTQAR	24	P10637-3
AEEATVGQAEEATVGHTEK	19	H3BIV5
AEECYYDETVASR	13	Q60675
AEEDEILNR	9	P35564
AEEDRYFR	8	O35143
AEEDSMEDPYELK	13	XP_006503645.2
AEEDVEPECIMEK	13	Q62418
AEEEFNIEK	9	P50518
AEEEGGSEEEGSDRSPQESK	20	P08553
AEEEGGSEEEGSDRSPQESK	20	A0A0R4J036
AEEELIK	7	XP_006526043.1
AEEEQQGTGPGAGTAASK	18	G3X9Q3
AEEERVEEEDRR	12	XP_006523666.1
AEEERVEEEDRR	12	XP_006523673.1; XP_006523669.1; Q9WV92-8
AEEFSEAQDMYYLETSAK	18	Q923S9
AEEGYENLLSPSDMAHIK	18	P55302
AEEHSVAILLLR	12	Q6PIP5
AEEILEK	7	XP_017173255.1
AEEINAEIER	10	Q8BTS3
AEEIWQQSVIGDYLAR	16	XP_017169916.1
AEELAAR	7	Q922Y1
AEELFLWVPR	10	XP_006516142.1
AEELFMEFAHK	11	P08032
AEELGLPILGVLR	13	Q921H8
AEELGLPILGVLR	13	Q8VCH0; Q921H8
AEELGQELK	9	XP_006507235.1
AEELHYPQGEHR	12	Q8BP92
AEELLDGIQDKIPTFQGLK	19	Q9DCJ9
AEELQPGFSK	10	Q3UJU9
AEEMEDEPFTER	12	Q569Z6
AEENGSEALMTLDDQANK	18	A0A0R4J104
AEEPSKAGDAPSEEK	15	P06837
AEEQEPELTSTPNFVVEVTK	20	Q8R5L1
AEEQEPERTSTPNFVVEVTKTDGK	24	O35658
AEERAELSEGK	11	XP_006511108.1
AEERAELSEGK	11	G5E8R1
AEERAELSEGK	11	NP_001157726.1; G5E8R1; F8WID5; P58771-2
AEERAELSEGK	11	G5E8R1; F8WID5
AEERAELSEGQVR	13	G5E8R2; E9Q448; E9Q450
AEERAELSEGQVR	13	G5E8R2; E9Q448
AEETETAAPPPDKDR	15	A0A0R4J0U2
AEETETAAPPPDKDR	15	A0A0N4SVH3
AEETGHWLWSR	11	B2RXS4
AEEVDPNFYSK	11	Q9DCV4
AEEVKQDKDDIINIFSVASGHLYER	25	Q6P5E4
AEEVYAQLQK	10	Q8BRN9
AEEWGVQYVETSAK	14	Q9JIW9
AEEYEFLTPMEEAPK	15	Q99PT1
AEFAAPPVDAPDR	13	NP_001157042.1
AEFAER	6	E9Q456; NP_001240669.1; XP_006511108.1; D3Z6I8; P58774-2; P21107; Q6IRU2
AEFAER	6	XP_006501898.1; NP_001240669.1; NP_001157726.1; G5E8R1; F8WID5; A2AIM4; E9Q5J9; P58771-2; Q6IRU2
AEFAER	6	G5E8R2; G5E8R1; F8WID5; XP_017175166.1; P21107-2; P58774-2; E9Q5J9; E9Q448; E9Q450; Q6IRU2
AEFAER	6	G5E8R2; G5E8R1; A2AIM4; P21107-2; Q6IRU2
AEFAER	6	NP_001240669.1; G5E8R2; G5E8R1; F8WID5; P21107-2; P58774-2; E9Q5J9; E9Q448; Q6IRU2
AEFDTSEIDSEIAALR	16	P41317
AEFFADVVPAVR	12	XP_011247852.1
AEFGFDLSHIPR	12	XP_006541262.1
AEFGFDLSHIPR	12	XP_006541262.1; A0A1B0GSH8
AEFGPPGPGPGSR	13	Q8VCT3
AEFLNK	6	E9QA15; E9QA16
AEFTSPPSLFK	11	XP_006504327.1
AEFTVETR	8	Q8BTM8
AEGAAQLSEER	11	P59017
AEGAGTEEEGTPK	13	Q91XV3
AEGATLSNATGAVESTSQAGDR	22	Q61644
AEGDAAALNR	10	Q6IRU2
AEGDAAALNRR	11	Q6IRU2
AEGEIKVPDVELK	13	E9Q616
AEGEREGEGGAGAPDSSSFSSK	22	A2ARP8
AEGESEAPNPEPR	13	Q542V3
AEGESEAPNPEPR	13	XP_017175823.1
AEGFESESEDGATKPK	16	XP_017174914.1
AEGFINLQVIDVPGPVR	17	A2ASS6
AEGFLGMYR	9	Q9DB41
AEGFVDALHR	10	Q3TIX6
AEGGLWLR	8	Q99N17
AEGGLWLR	8	Q3V1F1
AEGILDVFQTVK	12	P18052
AEGIPEFYDYDVALVK	16	B8JJN0
AEGIPELQASEK	12	Q3UNH4
AEGISVEMVIVEDDSAFTVLKK	22	XP_006527004.1
AEGIVFNTQSTIKL	14	Q99K67
AEGLSLQPYEEYFNVVR	17	P19137
AEGLWNLFLPLETDPEK	17	D3Z7X0
AEGLWNLFLPLETDPEK	17	Q8K370
AEGLWNLFLPLETDPEK	17	D3Z7X0; Q8K370
AEGLWNLFLPLETDPEKK	18	Q8K370
AEGLWNLFLPLETDPEKK	18	D3Z7X0; Q8K370
AEGPDVAVDLPK	12	E9Q616
AEGPEVDVNLPK	12	XP_017173761.1
AEGPEVDVNLPK	12	E9Q616
AEGPEVSLPK	10	E9Q616
AEGPGLNR	8	Q8BTM8
AEGPQEWVFQECK	13	NP_112419.3
AEGSDVANAVLDGADCIMLSGETAK	25	XP_011240976.1; P52480-2
AEGSDVANAVLDGADCIMLSGETAKGDYPLEAVR	34	XP_011240976.1; P52480-2
AEGSEAAQLAEIYGK	15	Q8K268
AEGSEIR	7	P09103
AEGSEYQVLYIADDNEIR	18	A0A0R4J0I9
AEGSITPMETEGLLR	15	Q8VBT6
AEGTDIPTVKPLKPRPEPPK	20	Q8BJH1
AEGTTIAEPDTK	12	XP_006496844.1
AEGVTALPYFLFK	13	A0A0A0MQN4
AEGYEVAHGGR	11	Q60676
AEHDQLLLNYAK	12	P14733
AEHDSILAEK	10	Q9D0R2
AEHQVGEDGFLLK	13	B2C3G8; P42232
AEHSAGKPTAGTTDAGEAAK	20	A2AG50
AEHSFAGVPCGIMDQLIALLGQK	23	Q9R0N0
AEIAFEDR	8	Q8VHX6
AEIAGSIAAHMR	12	Q5SUD5
AEIDLVCELAK	11	Q3V3R1
AEIDMLDIR	9	P97429
AEIELYLQK	9	O54998
AEIGIAMGSGTAVAK	15	Q64518
AEIHDLQEEHIKER	14	Q61771
AEIINHLADLLTDQREEILLANK	23	Q9Z110
AEIINHLADLLTDQREEILLANKK	24	Q9Z110
AEIIPGVLFIDEVHMLDIESFSFLNR	26	Q9WTM5
AEIITVSDGR	10	Q9CQ80
AEILFLK	7	O35551-6
AEILNLVK	8	E9PWQ3
AEIQELAMVPR	11	P08775
AEISFEDR	8	Q8BTM8
AEISFEDRK	9	Q8BTM8
AEISNAIDQYVTGTIGEGEDLVK	23	Q9CWJ9
AEITMGDPHQQTLAR	15	A0A0R4J0J6
AEITPMYGAQK	11	Q91VC9
AEITSQESQISSYEEELLK	19	H3BK65
AEIVPVTTTVLDDK	14	Q921H8
AEIVPVTTTVLDDKGDK	17	Q921H8
AEIVPVTTTVLDDKGDKK	18	Q921H8
AEIYNSVDQVKR	12	Q8VCR2
AEKDEPGAWEETFK	14	Q8BHN3-2; Q8BHN3
AEKELSEQIEK	11	P26040
AEKENTPSEANLQEEEVR	18	XP_006509098.1
AELAELPLR	9	Q9EQH3
AELAESR	7	XP_017175166.1; P21107-2; E9Q5J9
AELASTPVPNPDHQESLR	18	B2RQK7
AELATEEFLPVTPILEGFVILR	22	Q8VDM4
AELDDTPMR	9	Q8VIJ6
AELDDTPMR	9	XP_006503469.1
AELDGTILK	9	Q8R326
AELEALLSSK	10	Q6URW6-3
AELEALLSSKDDVGK	15	Q6URW6-3
AELEDLR	7	Q5DTM8
AELEGVAVTAPR	12	XP_006539986.1
AELEIQKDALEPGQR	15	P08030
AELELELGR	9	Q9QXS1
AELESFLQSPSGNPLNFNK	19	Q6DFV1
AELFESPQEQQGALPVPGPSR	21	XP_017175032.1
AELGALPDDFIDSLEK	16	XP_011243001.1
AELGALPDDFIDSLEKTDEDKYK	23	XP_011243001.1
AELGEYIR	8	Q9JHU4
AELGIPLEEVDLNEMDYLTR	20	G3XA48
AELGMNDSPSQSPPVK	16	XP_006500036.1
AELGNSGDWSQIADEVMSPK	20	Q62468
AELGTDLLSQLSLEDQK	17	Q9CW03
AELHVLDVR	9	XP_006512769.1
AELILLK	7	B2RSU7
AELLEFLESQQENMIK	16	G3X922
AELLISTVGPEECVVPFLTRPK	22	E9QB02
AELLLEEAKR	10	E9QN70
AELLRFPER	9	P97930
AELLVAEAPSKPIMVTVEEQR	21	Q05793
AELLYK	6	Q61035
AELNEFLTR	9	P62908
AELNFGAITLNSMDATSER	19	Q91YI0
AELNPWPEYINTR	13	Q9D0R2
AELPGTHPLASK	12	P13439
AELPVTDK	8	XP_006498008.1
AELQAQLAALSTR	13	P55937
AELQLR	6	Q9D3D9
AELQNDGPGDASLVLR	16	Q80WM4
AELQTALAHTQQAAR	15	E9PUQ5
AELRDDPIISTHLAK	15	Q8BG32
AELSEGK	7	NP_001157726.1; G5E8R1; F8WID5; P58771-2
AELSEGQVR	9	E9Q456
AELSEGQVR	9	G5E8R2
AELSEGQVR	9	G5E8R2; E9Q448; E9Q450
AELSLLR	7	Q4VBD2
AELSVIFADKPEK	13	D3Z041
AELVVIEDAATPR	13	Q9Z0P4
AELWLDGALLAR	12	XP_006524475.1
AEMDAAVESCK	11	Q9EQ20
AEMDAAVESCKR	12	Q9EQ20
AEMEDLVSSK	10	E9QPE7; O08638
AEMEDLVSSKDDVGK	15	E9QPE7; O08638
AEMETLVR	8	Q9EQF6
AEMEVLLASK	10	Q9QXS1
AEMLEIVQAIYK	12	Q91X97
AEMLQALASLEAVLLQTVYNTK	22	E9PZ16; Q05793
AEMLQALASLEAVLLQTVYNTK	22	XP_006538636.1; Q05793
AEMLQALASLEAVLLQTVYNTK	22	XP_006538636.1; B1B0C7; Q05793
AEMMELNDR	9	P03995
AEMNGLAAQGR	11	P05063
AEMPGNLQHYGR	12	Q8C1Y8
AEMQQILQGLDK	12	Q91YI0
AEMQQILQGLDKVAEEWAQGTFK	23	Q91YI0
AEMTVFVR	8	Q9WU63
AEMWLIR	7	Q3UEP4
AENAAGIGEPSR	12	A2ASS6
AENACVPPFTVEVK	14	Q9D964
AENEAGVGHPSEPTEILSIEDPTSPPSPPLDLHVTDAGR	39	A2ASS6
AENEALAMQK	10	Q61335
AENFFILR	8	P59999
AENFFILRR	9	P59999
AENGKLVIDGKPITIFQER	19	IP_1121881
AENGKLVIDGKPITIFQERDPTNIK	25	IP_1121881
AENGKLVINGKPITIFQER	19	A0A1D5RLD8; IP_989449; IP_1100888; IP_1093270; IP_870788; IP_1110662; IP_988848; IP_1078481; IP_899467
AENGKLVINGKPITIFQER	19	A0A1D5RLD8; IP_1017129; IP_857122; IP_973081; IP_870788; IP_1110662; IP_988848; IP_899467
AENGKLVINGKPITIFQER	19	A0A1D5RLD8; IP_873735; IP_901140; IP_857122; IP_1093270; IP_870788; IP_1110662; IP_988848; IP_899467
AENLQLLTENELHR	14	Q8R409
AENNPWVTPIADQFQLGVSHVFEYIR	26	Q9D031
AENPTNPGPGGSGYWRPGNSGSGSDGNR	28	E9PV24
AENQRPAEDSALSPGPLAGAK	21	XP_006529238.1
AENSQLTER	9	Q99PL5
AENSSLNLIGK	11	P46460
AENYDISPADR	11	NP_033483.2
AENYQLLWDTIASLK	15	D3YUZ8
AEPAAPHPTLK	11	XP_017168203.1
AEPAKIDAFR	10	P09411
AEPATPAEAAQSDR	14	Q7TPV4
AEPDESNAR	9	XP_006514407.1
AEPDIMER	8	Q9D826
AEPEDHYFLLTEPPLNTPENR	21	Q99JY9
AEPEILELESK	11	Q9WTQ5
AEPESETSILLSWTPPR	17	XP_017175536.1
AEPGEVVAPK	10	Q921K2
AEPGNLAGVR	10	Q9R061
AEPHFLSILQHLLLVR	16	E9PV41
AEPLNSVAH	9	Q6ZWM4
AEPNPEAGPEER	12	XP_006498600.1
AEPPLNASAGDQEEK	15	Q9JKR6
AEPPLNASAGDQEEK	15	XP_006510025.1; Q9JKR6
AEPPQCTSLAWSADGQTLFAGYTDNLVR	28	P68040
AEPSQLDIK	9	XP_006495812.1
AEPSQLDIK	9	XP_017174658.1; P20357
AEPTPSPQFPFADMPPPDTYK	21	A2ASS6; A2ASS6-3
AEPTQNALPFPHSAGDR	17	Q9Z2Y3
AEPVPKPPPETTVPPGTPK	19	O88737
AEPWAPLLEAELWPSLAHLPLTPGQK	26	XP_017177593.1
AEPYCSVLPGFTFIQHLPLSER	22	Q8VDM6
AEQAEADKK	9	F8WID5; A2AIM4; P58771-2
AEQAEADKKAAEDR	14	F8WID5; P58771-2
AEQAEADKKQAEDR	14	A2AIM4
AEQCAEFDGTDFQGR	15	B7ZN28
AEQDIATLEQSISR	14	XP_011241302.1
AEQEEEFISNTLFK	14	D3YZP9
AEQEEMEVEER	11	Q80XI4
AEQEEYVQEGIR	12	XP_011241116.1
AEQFLVGTSR	10	XP_006525218.1
AEQFYCGDTEGK	12	Q60597
AEQFYCGDTEGKK	13	Q60597
AEQGSGPVSGEKDVVFLIDGSEGVR	25	E9PWQ3
AEQGTVLIGSER	12	Q7TT37
AEQINQAAGEASAVLAK	17	Q99JB2
AEQLAAEAERDQPPR	15	Q9DCD2
AEQLASLEAAQR	12	NP_001269025.1
AEQLASVQYTLPK	13	XP_006540841.1
AEQLASVQYTLPK	13	XP_006540847.1
AEQLFSSALCAAR	13	P60487
AEQLGAEGNVDESQK	15	Q9CYI4
AEQMASVQNAQR	12	XP_006526967.1
AEQPHQHAMYYLR	13	NP_112419.3
AEQQGRPDDNLK	12	XP_011238417.1
AEQQTADQLLAR	12	F8VQJ3
AEQSLHDLQER	11	XP_006507597.1
AEQVDGVINLGNSLIER	17	P08032
AERPDGLILGMGGQTALNCGVELFK	25	Q8C196
AERPDGLILGMGGQTALNCGVELFKR	26	Q8C196
AESEEGPDVLR	11	Q9D662
AESEEMETSQAGSK	14	Q3U2G2
AESEVPIVK	9	XP_017177213.1
AESFFQTK	8	Q8R146
AESLAVDWVSR	11	A2ARV4
AESLEEFIK	9	Q60675
AESLIFR	7	Q9CQ65
AESLIGVYPEQGDCVISK	18	Q9CU62
AESLNGNPLFSK	12	Q544X6
AESLQQEVEALKER	14	XP_006505548.1
AESLQVTR	8	P46460
AESPDFPYLNTLLR	14	Q9CSH3
AESPEMEVNLPK	12	E9Q616
AESPVFVQTDKPIYKPGQIVK	21	Q61838
AESQNVAEESELETQK	16	Q6NVE8
AESSPNAEPSDEGNSR	16	P70663
AESTEQEPSAPK	12	NP_001157645.1
AESTPEIAEQR	11	XP_006532807.1
AESTPEIAEQR	11	G3UXW9
AETAPLPTSVDDTPEVLNR	19	Q99L43
AETDQGDPQPAPCDAPAGHPEPEPPAR	27	Q9D4J1
AETEEGPDVLR	11	Q01405
AETELKELEQK	11	E9QPE7; O08638
AETESAVAGPQGR	13	Q9D5J6
AETFTFHSDICTLPEK	16	P07724
AETFTFHSDICTLPEKEK	18	P07724
AETLAGATVDDTDGSSGTR	19	Q6P9Q4
AETMTVSSLAIR	12	XP_006498771.1; Q9Z2H5
AETSDVANAVLDGADCIMLSGETAK	25	XP_006501198.1
AETSELGLR	9	Q8CJ40
AETSESSGSAPAVPEASASPK	21	Q9Z2D6-2
AETSPPPVAAKPVALPGSQGTSLNLK	26	XP_006499773.1
AETVSPGEVDAMTLGK	16	Q3UNH4
AETYEGVYQCTAR	13	XP_006516017.1
AETYEGVYQCTAR	13	XP_006516007.1
AEVAAGDHPTDAEMK	15	P30416
AEVAAGDHPTDAEMKGER	18	P30416
AEVAEKGDVGLVAENSR	17	Q3U4X8
AEVAELLTHSGDFLVRESQGK	21	P16879
AEVAESR	7	P58774-2
AEVDDVIQVR	10	O88783
AEVDELR	7	XP_006507812.1
AEVEALHSSGMTAVVK	16	Q91W18
AEVEDKVYVHLK	12	E9PZD8
AEVGEKTEER	10	Q61029-3
AEVGQEGEAGQFDGEK	16	Q9WTQ5
AEVITCDVLLVCIGR	15	O08749
AEVLDDGLPEDVLFGNLDLLPPSGK	25	Q8VDP4
AEVLDSTK	8	Q9CR68
AEVLNQYQR	9	P08032
AEVLSEEPILK	11	A0A087WQS2
AEVQTLVSR	9	Q8BJ64
AEVSQPR	7	NP_033483.2
AEVTDEKLHVTVR	13	Q4VA93
AEVVECVSLVELTSLK	16	P08030
AEVVGKPSPEFFK	13	Q9D7I5
AEVVLGNIIK	10	P62482
AEVVLGNIIK	10	XP_011248500.1
AEVVLGNIIKK	11	P62482
AEVVSLLLDR	10	E9PUR0
AEVVTQDVAPNPDDPEDFPALA	22	E9QKB2
AEWAPPESAAGPR	13	XP_006537963.1
AEWCQIFDGTDACVTPVLTFEEALHHQHNR	30	O09174
AEWYRDDVLLK	11	XP_006508790.1
AEYEEHLGILGPVIR	15	O88783
AEYEFDSPYWDDISDSAK	18	Q8BW96; Q91YS8
AEYLCQIGDK	10	Q99JI4
AEYLCQIGDKEGALTAFR	18	Q99JI4
AEYNEVLLEEGK	12	Q60855
AEYQLQVTLESEDGR	15	O88338
AEYVVTK	7	Q9DC70
AFAACLEAIKLPK	13	Q91XD4
AFAAGADIK	9	Q8BH95
AFAAGADIKEMQNR	14	Q8BH95
AFAAQEDLEK	10	P26043
AFAAQEDLEKTKEELK	16	P26043
AFADALEVIPMALSENSGMNPIQTMTEVR	29	P80316
AFADAMEVIPSTLAENAGLNPISTVTELR	29	P80315
AFADEPPEPEASPSLWEIEFAK	22	Q61733
AFAEALLLHGAK	12	Q8VCC1
AFAENLGR	8	Q7TNG8
AFAFVTFADDK	11	Q921F2
AFAFVTFADDKVAQSLCGEDLIIK	24	Q921F2
AFAGDIANQLATDAVQIFGGYGFNTEYPVEK	31	P45952
AFAHITGGGLLENIPR	16	Q64737
AFAISGPFNVQFLVK	15	Q8C196
AFALDVINSAHER	13	Q91VM9
AFALNFQQTIAGK	13	O08601-2
AFALNFQQTIAGK	13	O08601
AFALYK	6	O88958; Q9CRC9
AFALYSEDEGVLR	13	O88322
AFAMIIDKLEEDINSSMTNSTAASRPPVTLR	31	P60335
AFAMIIDKLEEDISSSMTNSTAASRPPVTLR	31	XP_011243797.1
AFAMIIDKLEEDISSSMTNSTAASRPPVTLR	31	Q61990
AFAMTNQILVER	12	Q8C196
AFAPILPHLAEEVFQHIPYVTEPK	24	Q8BIJ6
AFAQAQSHIFIEK	13	Q61838
AFATAFGVNVLAANIHHPTLGMTGSGIHTPLK	32	A0A0R4J131
AFAVDIK	7	XP_006499939.2
AFAVGVQQVLLK	12	Q9EPL8
AFAVVASALGIPSLLPFLK	19	G5E866
AFAVWGEVAPLTFTR	15	P41245
AFAYLQVPER	10	XP_006538636.1; Q05793
AFAYLQVPER	10	E9PZ16; Q05793
AFAYTWFNLQAR	12	Q02780
AFCAGGDIK	9	Q8QZS1
AFCAGVFSSLIMVALLTHNPSLLR	24	Q8BTS3
AFCQELLQEEPR	12	Q9ERI6
AFCYFCNSVQK	11	Q922H9
AFDAIESAQSAR	12	Q8BX70
AFDCPETEYPAK	12	A2A9Q2
AFDEVKVDK	9	Q8K124
AFDIIDR	7	Q8BJ71
AFDITYVR	8	F8VQJ3
AFDKHMNLILCDCDEFRK	18	P63163
AFDLAPPEAVPQQK	14	Q7TSV4
AFDLAPPEAVPQQKDPDPEFPTVK	24	Q7TSV4
AFDLFNPNFK	10	Q8VE22
AFDMVHDPMAALETLLTLGFER	22	Q9D8X1
AFDNDVDALCNLR	13	Q99MN9
AFDNIINK	8	Q8C147
AFDQGADAIYEHINEGK	17	Q8R1I1
AFDQIR	6	P40142
AFDSFDQR	8	E9QKB2
AFDSGIIPMEFVNK	14	Q3V117
AFDTDIHAVRPHR	13	P35492
AFDVPIEEGPVFR	13	Q9D8I3
AFEDDDITHVEGSVDPIR	18	Q9CZ30
AFEDELR	7	Q3UGX2
AFEDEMSGR	9	Q62261
AFEEAEK	7	Q01853
AFEEAEKNAPAIIFIDELDAIAPK	24	Q01853
AFEEEQALR	9	P49429
AFEEESVEKDIPR	13	O35744
AFEHALSHIQHNQFQAR	17	O88492-2
AFEHDLQLLVSQVR	14	XP_006540499.1
AFEHLQQLELIKPVER	16	O88708
AFEIGPR	7	Q9Z2H7
AFEILHLHLDLR	12	Q8VCT3
AFELELSWVGELTK	14	O70435
AFELYDQDGNGYIDENELDALLK	23	P12658
AFEPATGR	8	Q3U367
AFEPATGR	8	Q9JLJ2
AFEPLR	6	B2RXS4
AFEPWEDIQENFLYYEEK	18	Q9WV35
AFEQLR	6	A0A0R4J0W9
AFETLLGQALTK	12	XP_006519239.1
AFEVTAR	7	Q62468
AFEYNMQIFSELDQAGSMLAR	21	XP_006521866.2
AFFDLIDADTK	11	Q3UUQ7
AFFDPSLLHLLYFPDDQK	18	Q6PD26
AFFESHPAPSAER	13	Q11011
AFFFQEK	7	XP_017177675.1
AFFPCFDTPAVK	12	Q8VCT3
AFFSEVER	8	P50580
AFFSEVERR	9	P50580
AFFSGSQR	8	Q8BHN3
AFFSGSQR	8	Q8BHN3-2
AFFSGSQR	8	Q8BHN3-2; Q8BHN3
AFFSPFR	7	XP_006515268.1
AFFTEEYSR	9	Q8C3J5
AFGAPGEAFSEPEEILFANSMGK	23	Q09PK2
AFGAPVPSVQWLDEEGTTVLQDER	24	P11627; Q6PGJ3
AFGENAVVQLISLQK	15	Q99KC8
AFGESSTESDEDEEEGCSHK	20	Q8K1L5
AFGFMTR	7	P61458
AFGFNVLFYDPYLSDGIER	19	O88712
AFGFSHLEALLDDSK	15	Q7TQI3
AFGFSHLEALLDDSKELQR	19	Q7TQI3
AFGGQSLK	8	Q8K2B3
AFGGQSLKFGK	11	Q8K2B3
AFGHHSVSLLDGGFR	15	Q3UW66
AFGIPIR	7	P11440
AFGIPVR	7	P49615
AFGLGVAYR	9	Q7TPM6
AFGPGIEGK	9	Q80X90
AFGPGLEGGLVNK	13	Q8VHX6
AFGPGLEPTGCIVDRPAEFTIDAR	24	Q8VHX6
AFGPGLQGGNAGSPAR	16	Q8BTM8
AFGSGYR	7	Q8BGD9
AFGSILNLVPLAESVVK	17	P04184
AFGVAFVK	8	B2RY04
AFGVPVR	7	P97377
AFGWYPHLGR	10	P21956
AFGYVCGGEGQHQFFAIK	18	A0A0R4J104
AFGYYGPLR	9	P84104
AFHFYLVR	8	A0A0R4J1N4
AFHGLAGGTGVAFSEVVK	18	Q3TNA1
AFHITNDEPIPFWTFLSR	18	Q9R1J0
AFHITQGLLK	10	Q5SUR0
AFHNEAQVNPER	12	P11983
AFHNEAQVNPERK	13	P11983
AFHPFIAGPYNR	12	Q8VDJ3
AFHPTYEEK	9	A0A0R4J079
AFIDCCNHITK	11	P01027
AFIFIDESHITHAFTWLSQK	20	XP_006505761.1
AFIGDIK	7	F8WJ05
AFIGFEGVK	9	E9Q557
AFIGLGFGDR	10	Q9D1J1
AFIHWVSQPLVCEIR	15	Q8BML9
AFIITGQTYTR	11	P54822
AFINLEAAGVGGK	13	XP_006527053.1
AFIPAIDSFGFETDLR	16	A2AH85
AFIPQLLSR	9	NP_112419.3
AFITNIPFDVK	11	Q9D0E1
AFITVLEMTPVLGTEIINYR	20	XP_006515962.1
AFIVLNPDYK	10	Q3UNX5-2
AFIVLNPEFLSHDQEQLIK	19	Q91VA0
AFIVLSPAYASHDPEALTR	19	XP_006507967.1
AFKAWAVAR	9	P07724
AFKDDYVVSLVR	12	XP_017172512.1
AFKDDYVVSLVR	12	Q9JKF7
AFKDIDIEDLEELDPDFIMAK	21	P23116
AFKDIVVTINDHK	13	S4R1S4
AFKDIVVTINDHKR	14	S4R1S4
AFLADPSAFAAAAPAAAATTAAPAAAAAPAK	31	P14869
AFLADPSAFAAAAPAAAATTAAPAAAAAPAK	31	ENSMUSP00000132472.2
AFLADPSAFAAAAPAAAATTAAPAAAAAPAK	31	ENSMUSP00000132472.2; P14869
AFLAELEQNSPK	12	E9PVY8
AFLDFHSLPYQVVEVNPVR	19	Q8BWM0
AFLDFHSLPYQVVEVNPVRR	20	Q8BWM0
AFLDFYHSFLEK	12	XP_006539628.1
AFLEALQNQAETSSK	15	Q9CQN1
AFLEDLHVAPSLR	13	Q8R0V5
AFLEEGFTNKAEEINAEIER	20	Q8BTS3
AFLEENQLDYIIR	13	Q60676
AFLEQAR	7	O35488
AFLEVNEEGSEAAASTSVVITGR	23	P32261
AFLFDVVSK	9	B1AWT3
AFLFDVVSK	9	Q99K70
AFLFEK	6	Q9EP71
AFLIEEQK	8	Q9D1R9
AFLISLLNLFDDTAK	15	Q6KCD5
AFLLMFIK	8	XP_006502414.1
AFLLSGVDELEQR	13	XP_006505980.1
AFLMEQDPENDFLVTSHIHLHVPEGATPK	29	Q8CGK3
AFLNAIMR	8	XP_006505343.1
AFLPLLR	7	P51658
AFLPVMMK	8	Q9EQ06
AFLQGGQEATDIALLLR	17	XP_006505548.1
AFLQNPDLGDAASVEAR	17	O08900
AFLSPPTLLEGPLR	14	A0A1W2P711
AFLSSHLQDLSTVVR	15	O35206
AFLSSPEHVNRPINGNGK	18	P19157
AFLSSPEHVNRPINGNGKQ	19	P19157
AFLSTHPHTETAFEAFLK	18	XP_006500434.1
AFLTFLYR	8	XP_017175032.1
AFLTLAEDILR	11	P61027
AFLTLAEDILRK	12	P61027
AFLVTPR	7	XP_017167703.1
AFLVTPR	7	Q9Z1R3; XP_017167703.1
AFLWQR	6	Q9DD20
AFMEEFGAEPELAVSAPGR	19	Q9R0N0
AFMGPLK	7	P27659
AFMTADLPNELIELLEK	17	XP_006534046.1
AFNADFR	7	Q9JHI5
AFNDPFIQK	9	Q61699
AFNIER	6	Q8C5H8
AFNLEK	6	Q99K48
AFNNKGDGPYSLVAVINSAQDAPSEAPTEVGVK	33	P12960
AFPANGALFLAYEYSR	16	Q9WVD5
AFPAWADTSILSR	13	Q9EQ20
AFPDKFHLEPTSPPTTDGFK	20	Q8VCB3
AFPFHIIFDR	10	O54865
AFPFPVCFGQDVDAAFGAALVMLQR	25	Q9D5J6
AFPLFTHR	8	XP_006499506.1
AFPLPSLSR	9	XP_011240623.1
AFPNPYADYNK	11	O89112
AFPSYFSK	8	Q9CQ69
AFPTQTAGTFK	11	Q8BKX1
AFPTVFHSSLVQHEVVAK	18	Q8C165
AFPVLLLDVVPWYLR	15	Q8BXQ2
AFPVNAATFLSYEYLLR	17	Q8CFJ7
AFPVYLWQPYLR	12	Q3UW53
AFPYGNVAFPHLTSSAPSWPSLVDTTK	27	XP_006504327.1
AFQCSR	6	XP_006514044.1; XP_006514092.1
AFQEAAEHFQPYIK	14	XP_006501010.1
AFQFVETHGEVCPANWTPESPTIKPSPTASK	31	P20108
AFQGLLDSYSVR	12	Q8CC86
AFQINTFNLK	10	P17047-2
AFQNTLSDLK	10	G5E895
AFQNTLSDLK	10	P21300; G5E895
AFQNVIAPR	9	Q8BFR4
AFQPYGLHGGEPGTR	15	XP_006521570.1
AFQSAFR	7	Q8K2Z4-2
AFQSGQDPSK	10	XP_017174914.1
AFQVLMELENPVLISLGK	18	Q9D7I5
AFQVWCVGNEALVGPR	16	O70503
AFSAFVGQMHQQGILK	16	Q6ZQ08-4
AFSAFVGQVELLER	14	XP_006530933.1
AFSDPFVEAEK	11	Q3U2G2
AFSDPFVEAEKSNLAYDIVQLPTGLTGIK	29	Q3U2G2
AFSGLNSLEQLTLEK	15	XP_006511149.1
AFSGYLGPDESK	12	H3BKH6
AFSGYLGPDESKWK	14	H3BKH6
AFSIDIIR	8	B1ARU1; XP_011238717.1
AFSIQGAPSDSGPLR	15	A0A0G2JEG8
AFSPTTVNTGR	11	P61620
AFSQFVRPLIAAK	13	XP_006505343.1
AFSQHVLHR	9	Q8BYW9
AFSSLNTLPEDLRPIVPLFCSVLTK	25	Q8K411
AFSSPQEEEEAGFTGR	16	Q8CB77
AFSTWLK	7	P26041
AFSVFLFNTENK	12	G3XA48
AFSVFLFNTENKLLLQQR	18	G3XA48
AFSWASVTSK	10	P97379
AFSYYGPLR	9	Q8BL97
AFTATLSLFPYHK	13	A2A9Q2
AFTAWK	6	P23492
AFTELQAK	8	Q9CQF7
AFTGFIVEADTPGIHIGK	18	P45952
AFTGFIVEADTPGIHIGKK	19	P45952
AFTGQVAPAQVLEALCR	17	XP_006524930.1
AFTHGVAMSGGGGVNMASHQK	21	Q9QYB5
AFTHTAQYDEAISDYFR	17	Q9CWJ9
AFTMDCITLEGDQVSHR	17	Q9CW03
AFTNPEDACSFITSANFPALVVK	23	Q64737
AFTSQASATMHLPATIGDYTDFYSSR	26	P35505
AFTTWTANAGIEECR	15	Q9R0H0-2
AFTYINLDK	9	Q62351
AFTYINLDKVVLGTSNFK	18	Q62351
AFVAGVLPLK	10	Q9D7H3
AFVAIGDYNGHVGLGVK	17	P25444
AFVDSCLQLHETK	13	A0A0R4J083
AFVDSCLQLHETKR	14	A0A0R4J083
AFVEAQNK	8	Q9QUR6
AFVEFLTDEIK	11	Q8R5L1
AFVEFLTDEIK	11	O35658; Q8R5L1
AFVEFLTDEIKEEK	14	Q8R5L1
AFVEFLTDEIKEEK	14	O35658; Q8R5L1
AFVEFLTDEIKEEKK	15	Q8R5L1
AFVEFLTDEIKEEKK	15	O35658; Q8R5L1
AFVENITVLENSLVFK	16	Q3KQQ2
AFVENITVLENSLVFK	16	Q3KQQ2; Q80YX8
AFVFDVLHEGCLITPPELLR	20	Q9DC50
AFVFILEPK	9	Q8CIH5
AFVGNQLPFIGFTYFR	16	P70336-2
AFVGNQLPFVGFTYYSNR	18	P70335
AFVHWYVGEGMEEGEFSEAR	20	Q9JJZ2; P68369; P68373; A0A0A0MQA5
AFVHWYVGEGMEEGEFSEAR	20	P68369; P68373; A0A0A0MQA5
AFVHWYVGEGMEEGEFSEAR	20	P68369; A0A0A0MQA5
AFVHWYVGEGMEEGEFSEAR	20	Q9JJZ2; IP_1052575; P68369; A0A0A0MQA5
AFVHWYVGEGMEEGEFSEAREDMAALEK	28	P68369; P68373; A0A0A0MQA5
AFVHWYVGEGMEEGEFSEAREDMAALEK	28	IP_1052575; P68369; A0A0A0MQA5
AFVPPLAEDLLAR	13	Q4LDD4
AFVPQLR	7	XP_011240739.1
AFVRPSGTEDIVR	13	Q9CYR6
AFVSGFDGSAGTAIITEEHAAMWTDGR	27	Q3UE92
AFVSMVYSEEGAEDR	15	Q9CU62
AFVTDWDKVTATVAGLTLLAVGVYSAK	27	Q925I1
AFVTMLDELLAEHK	14	Q9JKY7
AFVVLAPEFLSHDR	14	Q8K0L3-2
AFVVLAPEFLSHDRDQLTK	19	Q8K0L3-2
AFVVSFK	7	Q8VDG5
AFVYLSNLLYPVPLIHR	17	Q60575
AFYAELYHIISSNLEK	16	P97372
AFYEHAPK	8	P01027
AFYLEAR	7	Q80ZW2
AFYLER	6	Q69ZK0
AFYLNR	6	Q8K1X4
AFYMEEGAPYCER	13	Q3TJD7
AFYNNVLGEYEEYITK	16	P29758
AFYSLGNYLVASEIAK	16	Q3U5Q7
AGAAAGGPATLAVCVCK	17	E9Q5D9
AGAAAPELLQALLR	14	XP_006526806.1
AGAAFDPVSFAR	12	Q8R191
AGAAGGPEEEAEKPVK	16	Q6P8I4
AGAAGSLGAGLIPVSSELCYR	21	Q69ZK0
AGAAGTSEATSSVR	14	Q9R069
AGAAPMETVDKR	12	Q3UQA7
AGAASLDVIQEVEYVKEEAK	20	Q91VN6
AGACVTSESTVMR	13	Q9DBC0
AGADEERAETAR	12	P80314
AGADIIGVNCR	11	Q91WS4
AGADIIITYFAPQLLK	16	P10518
AGADVLQTFTFSATEDNMASK	21	Q91WS4
AGAEGFVR	8	Q3U816
AGAEGILTNR	10	P27870
AGAEQLDSWLTDEER	15	Q3U0V2
AGAGGPGLAALVAFVR	16	Q9CQT1
AGAGGPGLAALVAFVRDQLR	20	Q9CQT1
AGAGLSSLCLVLSTRPHC	18	Q99LD8
AGAGSATLSMAYAGAR	16	P08249
AGAIAPCEVTVPAQNTGLGPEK	22	P14869
AGAIAPCEVTVPAQNTGLGPEK	22	ENSMUSP00000132472.2
AGAIAPCEVTVPAQNTGLGPEK	22	ENSMUSP00000132472.2; P14869
AGAISASGPELEGAGHSK	18	E9Q616
AGAKPDQIGIITPYEGQR	18	Q9EPU0
AGALLPAIR	9	XP_006500638.1
AGALNISLPFSFIDFYR	17	Q9CZJ2
AGALQCSPSDVYTK	14	P26039
AGALQCSPSDVYTKK	15	P26039
AGAPPGLFNVVQGGAATGQFLCHHR	25	Q3U367
AGAPPGLFNVVQGGAATGQFLCHHR	25	Q9JLJ2
AGAPTAGSFR	10	P28076
AGAQGAAAITTSGSTKPPGAR	21	Q5SWP3
AGASISTLAGLSLR	14	Q8CBY8
AGASIVGVNCHFDPSVSLQTVK	22	O35490
AGATLDILVENMGR	14	P23780
AGATSEGVLANFFNSLLSK	19	Q8R1Q8
AGATVYITGR	10	Q99L04
AGAVEKGVPLYR	12	P17182
AGAVEKGVPLYR	12	P17182; XP_017175442.1
AGAVGTHLPTSSLDIFGDLR	20	Q9D8V7
AGAVGTHLPTSSLDIFGDLRK	21	Q9D8V7
AGAYDFPSPEWDTVTPEAK	19	P11798; P28652; XP_006518551.1; E9Q1T1
AGAYDFPSPEWDTVTPEAK	19	XP_006518551.1; F8WIS9; A0A0G2JGS4; XP_006514527.1
AGCECLNESDEHGFDNCLR	19	Q8CDN6
AGCECLNESDEHGFDNCLRK	20	Q8CDN6
AGCEMLQR	8	XP_017169969.1
AGCPPGNPTAGR	12	P32921-2
AGCQVVAPSDMMDGR	15	P10518
AGCQVVAPSDMMDGRVEAIK	20	P10518
AGCRPAGSTHGYEYPK	16	XP_006523482.1
AGDAFGDTSFLTSK	14	XP_006533878.1
AGDEFVEK	8	Q61425
AGDEIICMDEVYGGTNR	17	Q8VCN5
AGDELTKLGEEDEQGWCR	18	Q61644
AGDEVDEPSER	11	Q69Z99
AGDFGAAFVER	11	XP_006521570.1
AGDGIGVAR	9	XP_006518805.1
AGDIITVLEQHPDGR	15	XP_006524376.1
AGDLGVDLTSK	11	Q9DCW4
AGDLLLR	7	XP_006503239.1
AGDLVFAK	8	Q9JMG7-2
AGDMENAENILTVMK	15	Q6PB66
AGDREDITEPAICALR	16	Q02248
AGDSIVLSAISILGKPLPK	19	A2ASS6
AGDTILNSNHIGR	13	Q9D773
AGDTILNSNHIGR	13	XP_006524431.1
AGDTLQGIALK	11	G3X915
AGDTVIPLYIPQCGECK	17	P28474
AGDVEEDASQLIFPK	15	Q9D7M8
AGDVIFLLSK	10	P97369
AGDVLEDSPK	10	P51859
AGDVLWLR	8	Q8K1B8
AGDWQCPNPGCGNQNFAWR	19	XP_006514571.1
AGEASAESTGAADGAAPEEGEAK	23	Q91XV3
AGEDVQLLIPFK	12	A2ASS6
AGEEAADSPELPR	13	Q9CPW2
AGEEDRGQLEDDAVYEDQSQK	21	XP_006519239.1
AGEEEPGEPFEIVER	15	XP_017174914.1
AGEEITQAQR	10	Q09014
AGEFFLK	7	Q99M04
AGEGGGVIQGSASEATLVALLAAR	24	XP_006514549.1
AGEGNEEISNMIHSYIK	17	XP_017171930.1
AGEIEMELQR	10	Q8BGT5
AGEITFAEK	9	Q62351
AGEIVVFK	8	Q9D8V7
AGEKEATSQSVEQLEAR	17	Q99JP6-2
AGELEVFNGYFVHFFAPENLDPIPK	25	G3X977
AGELTEDEVER	11	A0A1Y7VKY1
AGELVLTSESSR	12	Q8R035
AGEMTEVLPNQR	12	Q99J08
AGEPLGVTFR	10	Q9JLB0
AGEPLGVTFR	10	Q9JLB0-2
AGEPLGVTFR	10	Q9JLB0; Q9JLB0-2
AGEPVELFGK	10	B1B1A8
AGEPVNIPADVTGLPMPK	18	A2ASS6
AGEQDASIHLK	11	XP_006510118.1
AGEQDASIHLK	11	XP_006510125.1; XP_006510130.1; XP_006510128.1
AGEQLAPFLPQLVPR	15	XP_006537910.1
AGEQQETASLELLKEPPR	18	XP_006507235.1
AGESEPSEPSDPVLCR	16	A2ASS6
AGESVLVHGASGGVGLATCQIAR	23	P47199
AGEVFIHK	8	Q99K48
AGEVINQPMMMAAR	14	XP_006518985.1
AGEVRPNGEGADPGGGR	17	Q6IQX8
AGEYEALPEK	10	Q91XD4
AGEYEALPEKLK	12	Q91XD4
AGEYSVTYDGFNTFTIPK	18	A2BIM8; P11589
AGEYSVTYDGFNTFTIPK	18	A2BIM8; Q4FZE8; A2CEL1
AGEYSVTYDGFNTFTIPK	18	B5X0G2; A2AKN8; A2BIM8; Q4FZE8; A2CEL1
AGEYSVTYDGFNTFTIPK	18	B5X0G2; A2BIM8; A2CEL1; P11589; B8JI96
AGEYSVTYDGFNTFTIPK	18	A2BIM8; A2CEL1; P11589
AGEYSVTYDGSNTFTILK	18	Q5FW60
AGFAALQLEYFFTAGPDEVR	20	Q9CZ30
AGFAGDDAPR	10	P60710; IP_1099887; P62737; P68033
AGFAGDDAPR	10	P62737; P68134; P63260
AGFAGDDAPR	10	P60710; IP_1099887; IP_828140; P62737; P68033
AGFAGDDAPR	10	P60710; IP_1099887; IP_828140; P68033
AGFAGDQIPK	10	P61164
AGFAGDQIPK	10	P61164; Q8R5C5
AGFALDEGLANPTDAFTVFYSER	23	Q99JW2
AGFFCPICSLFYSGEK	16	XP_006505767.1
AGFGNLER	8	P12804
AGFGTKGSSSSMTSR	15	P31001
AGFLAFTQLPK	11	G3X922
AGFLDLK	7	P26039
AGFLDLKDFLPK	12	P26039
AGFLDLKDFLPK	12	XP_006537833.1
AGFLINPQDPIPR	13	Q4FZC9
AGFPIHLLPDIAEPGSMAGR	20	Q9D5J6
AGFSETFLNEMIAPVMK	17	Q9CQF9
AGFSHMLIQR	10	P27046
AGFTGGVVVDFPNSAK	16	Q9CY21
AGFVGMPPPALPR	13	XP_006501121.1
AGFVPVYLR	9	Q8K224
AGFWEEFESLQK	12	P29351-2; P29351-3
AGFWEEFESLQKQEVK	16	P29351-2; P29351-3
AGFYFDGISR	10	Q08879; Q08879-2
AGGAAGLFAK	10	XP_006521343.2
AGGAFDPYTLVR	12	O55100
AGGAGVPAFYTSTGYGTLVQEGGSPIK	27	Q9D0K2
AGGAGVPAFYTSTGYGTLVQEGGSPIKYNK	30	Q9D0K2
AGGANYDAQSE	11	Q9CQI6
AGGASPAASSTTQPPAQHR	19	Q8R3Y8
AGGAVSGEEK	10	Q8R146
AGGDAADGSQPALDNK	16	XP_006512447.1
AGGDSGNVDDDCER	14	A0A1L1SV73
AGGDSGNVDDDCER	14	XP_006508336.1
AGGEFLLR	8	P82343
AGGFLMK	7	P09411
AGGFLMKK	8	P09411
AGGFVVGYTPSGNPIFR	17	Q924C1
AGGGAAEQEELHYIPIR	17	Q8K1R7
AGGGAGGGGGAASGPAAGTPSAPGPR	26	XP_006533801.1
AGGGSIEVSVPR	12	Q3TIX6
AGGIETIANEFSDR	14	Q61699
AGGIETIANEYSDR	14	Q3U2G2
AGGILQEDITEACLILGVK	19	Q99K67
AGGLATTGDKDILDIVPTEIHQK	23	Q9QXD6
AGGLIYQWDSYSPR	14	Q9ES56
AGGLLVYK	8	O88325
AGGMLSPETLTGIHK	15	Q61635
AGGPGLER	8	Q80X90; Q8BTM8
AGGPLGLSIVGGSDHSSHPFGVQDPGVFISK	31	Q80U72-3
AGGSASAMLQPLLDNQVGFK	20	O09061
AGGSLCHILAAAYK	14	XP_006514083.1
AGGSPASYHGSTSPR	15	Q8CHU3
AGGTESIVAAMTR	13	XP_011240636.1
AGGTETPSANGEAGGGESAK	20	Q8C4C9
AGGTWLGISTR	11	Q8BTN3
AGGTWLGISTR	11	P54797
AGGVASGLNHVLTNDLTAK	19	Q60604
AGGVGLVR	8	Q8VE95
AGHASGAAMWPGADVK	16	Q9EQG7
AGHDQVVVLLK	11	NP_001241664.1
AGHFDKEIVPVLVSSR	16	Q80X81
AGHFDKEIVPVLVSSR	16	Q8CAY6
AGHFDKEIVPVLVSSR	16	Q80X81; Q8CAY6
AGHFFDLPDFLSWK	14	XP_011238935.1
AGHLTSVHSPEEHK	14	A0A0R4IZX5
AGHMVPSDQGEMALK	15	Q920A5
AGHPFMWNEHLGYVLTCPSNLGTGLR	26	P07310
AGHQLQHDLFFDTLK	15	Q91W43
AGHQSAAASNLSGLSLQEAQQILNVSK	27	XP_017172602.1
AGHYAASVIIR	11	P55264
AGIALNDNFVK	11	V9GX06; IP_903807; IP_857188
AGIATHFVDSEK	12	Q8QZS1
AGIDDISVENKPLYQMR	17	XP_006524264.1
AGIDGESIGNCPFSQR	16	XP_006524198.1
AGIEGPLLASEVER	14	H9KV00
AGIFQSAK	8	Q9CPQ1
AGIGDSGCTAAR	12	Q8VIM9
AGIGPPSDASNPVLMK	16	A2ASS6
AGIIASAR	8	P58252
AGIICQLNAR	10	P49717
AGIIQVLLEAVAIAAK	16	A0A1D5RLL3
AGIISTVEVLK	11	Q11011
AGIKVTVAGLAGKDPVQCSR	20	Q99LX0
AGILTTLNAR	10	Q61881
AGIPKEEVK	9	Q8QZT1
AGIPKEEVKEVYMGNVIQGGEGQAPTR	27	Q8QZT1
AGIPTSSVFALHSTEPPISAQLLAFLR	27	XP_006516142.1
AGIPVFAWK	9	P50247
AGIRDGVVKPLK	12	P19096
AGISFIIK	8	XP_006504447.1
AGISTNPK	8	A0A0M3HEQ0
AGITDQVVIGMDVAASEFYR	20	IP_1023015
AGITPSYPQGSSWEHVSNNVR	21	Q80VP0
AGIVQEDVQPPGLK	14	D3Z7Q2
AGIVTSLQAR	10	P97310
AGIYYLNYDGFNTFTILK	18	Q80YX8
AGIYYMNYDGFNTFSILK	18	Q3KQQ2
AGKEPGLQIWR	11	XP_006498053.1
AGKEPGLQIWR	11	P13020
AGKFPSLLTHNENMVAK	17	P53026
AGKFPSLLTHNENMVAK	17	Q5XJF6
AGKLDPHLVLDQLR	14	Q3UH59; Q8VDD5
AGKPHLVLGLLWQIIK	16	Q99K51
AGKPHLVLGLLWQIIK	16	XP_006527794.1
AGKPVICATQMLESMIK	17	XP_011240976.1; P52480-2
AGKPYQLQIYPNER	14	XP_006524217.1
AGKQGLLGINIAEK	14	A0A0R4J083
AGLAAISR	8	Q91X58
AGLAFGVK	8	Q8VCZ9
AGLAPVPMIIFAK	13	P70697
AGLDVKPFITNPR	13	Q8R3P0
AGLEAIGNQK	10	P70663
AGLEAIGNQKDTDEK	15	P70663
AGLEDSEEDVEEAEVEAEDKDH	22	A2AQ07
AGLELEQEVVGLEDPR	16	Q6P5H2
AGLELSPEMK	10	P12658
AGLENEDVIIEVNGENVQEEPYDR	24	Q9JIL4
AGLENEDVIIEVNGENVQEEPYDRVVER	28	Q9JIL4
AGLEPFFDFIVSINGSR	17	Q99JX3
AGLEQGSDAGYLAESQK	17	Q8BMS1
AGLGSGGDMTMSMTGR	16	XP_006539986.1
AGLGSGGDMTMSMTGR	16	XP_011248862.1
AGLGTAESQNSGLGGQLSEVSGR	23	B2RQK7
AGLIGGIK	8	XP_006514549.1
AGLILFGNDDR	11	Q8R0Y6
AGLITNFNEPINQIATQIAVLIAK	24	Q8K2V6
AGLLALEFYTPEAANWR	17	Q99KK7
AGLLDGDR	8	Q9JIL4
AGLLEPEVFHLNPAR	15	P52825
AGLLFIFNFHPSK	13	F6ZHD8
AGLLGLLEEMRDER	14	XP_006518741.1; Q91Z83
AGLLGQPR	8	Q9WV98
AGLLPNHRPQLPEGCLPK	18	Q5U5I3
AGLLPSGPRPGYVAIQALLSNR	22	Q61578
AGLLTEQAPGDTLTAVESK	19	P59016
AGLLWALAAALER	13	A0A1B0GSU0
AGLNCSTETMPIK	13	Q6ZWX6
AGLNQNMDAITEELQAK	17	E9PVY8
AGLNQNMDAITEELQAK	17	B1ARU1; XP_011238717.1
AGLPCQDLEFVQFHPTGIYGAGCLITEGCR	30	Q8K2B3
AGLPFGLMR	9	E9Q3V9
[truncated: 67,120 more rows]
