# Supplementary material for: Mapping Microproteins and ncRNA-Encoded Polypeptides in Different Mouse Tissues
Source: Front Cell Dev Biol. 2021 Jul 26;9:687748. doi: 10.3389/fcell.2021.687748 (PMC8350139; doi:10.3389/fcell.2021.687748)
Supplement: Supplementary file 4 [file Table_3.XLSX]

## Sheet: Proteins
Total proteins identified using top-down method
Accession	Tissue	Gene type	Brain	Heart	Kidney	Liver	Spleen	Length	Coverage
IP_916780	liver,	ncRNA	0	0	0	1	0	29	0.552
IP_986572	kidney,	mRNA	0	0	1	0	0	29	0.517
II_893833	kidney,heart,	ncRNA	0	5	1	0	0	30	0.8
IP_830483	brain,	ncRNA	1	0	0	0	0	30	0.767
IP_2454202	kidney,	mRNA	0	0	1	0	0	30	0.733
IP_873734	heart,	ncRNA	0	1	0	0	0	30	0.467
IP_1019290	liver,	ncRNA	0	0	0	1	0	30	0.2
S4R1H9	kidney,	mRNA	0	0	3	0	0	31	0.677
IP_2519091	spleen,	mRNA	0	0	0	0	1	31	0.645
IP_1089395	brain,	mRNA	1	0	0	0	0	31	0.613
IP_1100473	liver,	mRNA	0	0	0	1	0	31	0.548
IP_990549	liver,	mRNA	0	0	0	1	0	31	0.484
IP_1049346	heart,	mRNA	0	1	0	0	0	31	0.452
IP_862908	liver,	mRNA	0	0	0	1	0	31	0.419
IP_931694	spleen,	mRNA	0	0	0	0	1	31	0.355
IP_2469441	heart,	ncRNA	0	1	0	0	0	31	0.226
IP_1121109	kidney,	ncRNA	0	0	2	0	0	32	0.625
IP_959231	heart,	mRNA	0	1	0	0	0	32	0.5
IP_2414697	kidney,	mRNA	0	0	1	0	0	32	0.406
IP_1006107	liver,	mRNA	0	0	0	1	0	32	0.219
II_1028055	liver,	mRNA	0	0	0	1	0	33	0.97
IP_988741	heart,	ncRNA	0	2	0	0	0	33	0.879
IP_919041	liver,brain,kidney,heart,	ncRNA	1	4	5	1	0	33	0.667
IP_829752	kidney,	ncRNA	0	0	3	0	0	33	0.242
IP_1149211	kidney,	ncRNA	0	0	1	0	0	34	0.206
II_935113	brain,kidney,heart,	ncRNA	1	2	1	0	0	35	0.429
IP_900204	spleen,	ncRNA	0	0	0	0	1	35	0.286
II_647476	liver,	ncRNA	0	0	0	1	0	36	1
IP_923329	liver,	ncRNA	0	0	0	3	0	36	0.722
IP_985123	brain,	mRNA	1	0	0	0	0	36	0.5
IP_1148477	kidney,heart,	mRNA	0	1	1	0	0	36	0.194
IP_979125	heart,	mRNA	0	21	0	0	0	37	0.946
IP_937792	brain,	mRNA	1	0	0	0	0	37	0.514
IP_940459	kidney,	mRNA	0	0	1	0	0	37	0.486
Q8BTB6	brain,	mRNA	1	0	0	0	0	38	1
IP_1088608	kidney,	mRNA	0	0	1	0	0	38	0.579
IP_968042	kidney,	ncRNA	0	0	1	0	0	38	0.474
IP_981552	liver,	ncRNA	0	0	0	1	0	39	0.436
IP_1093788	kidney,	ncRNA	0	0	1	0	0	39	0.282
IP_1110883	brain,heart,	ncRNA	1	1	0	0	0	39	0.256
A0A1L1SRX5	spleen,	mRNA	0	0	0	0	2	40	0.825
IP_907494	liver,	ncRNA	0	0	0	1	0	40	0.525
IP_967703	kidney,	ncRNA	0	0	1	0	0	40	0.5
IP_1042280	heart,	ncRNA	0	1	0	0	0	40	0.375
IP_1040369	liver,	ncRNA	0	0	0	1	0	40	0.275
IP_858912	heart,	mRNA	0	1	0	0	0	40	0.175
IP_998609	spleen,	ncRNA	0	0	0	0	1	40	0.175
IP_922194	liver,spleen,kidney,	ncRNA	0	0	1	1	1	41	0.512
IP_954346	liver,	mRNA	0	0	0	1	0	41	0.195
IP_854375	spleen,	mRNA	0	0	0	0	1	42	0.5
IP_2548649	spleen,	ncRNA	0	0	0	0	1	42	0.262
M0QWK5	spleen,	mRNA	0	0	0	0	1	43	0.674
IP_959655	kidney,	mRNA	0	0	1	0	0	43	0.535
IP_1079827	kidney,	mRNA	0	0	1	0	0	43	0.233
Q6ZWY8	liver,brain,spleen,kidney,heart,	mRNA	78	23	21	21	100	44	1
IP_924055	brain,	ncRNA	1	0	0	0	0	44	0.5
IP_2464706	kidney,	ncRNA	0	0	1	0	0	44	0.341
IP_1102827	brain,	mRNA	1	0	0	0	0	44	0.318
A2AF33	kidney,	mRNA	0	0	1	0	0	45	0.978
IP_1062627	kidney,	mRNA	0	0	1	0	0	45	0.333
IP_2413809	kidney,	ncRNA	0	0	1	0	0	45	0.267
IP_1138383	kidney,	mRNA	0	0	1	0	0	45	0.244
IP_2432440	spleen,	ncRNA	0	0	0	0	1	45	0.2
IP_2509251	kidney,	ncRNA	0	0	1	0	0	46	0.217
IP_903208	liver,kidney,	ncRNA	0	0	16	16	0	47	0.936
IP_969849	spleen,	ncRNA	0	0	0	0	1	47	0.447
IP_851957	kidney,	mRNA	0	0	1	0	0	47	0.426
IP_2433971	heart,	ncRNA	0	1	0	0	0	47	0.362
IP_966350	liver,	mRNA	0	0	0	1	0	47	0.319
IP_875702	spleen,	ncRNA	0	0	0	0	1	48	0.667
IP_972842	heart,	ncRNA	0	1	0	0	0	48	0.5
IP_1028504	kidney,	mRNA	0	0	1	0	0	48	0.146
II_866585	liver,spleen,kidney,	ncRNA	0	0	2	2	1	49	0.776
IP_1067496	liver,	mRNA	0	0	0	1	0	49	0.122
P20065	spleen,	mRNA	0	0	0	0	1	50	1
IP_1092106	kidney,	mRNA	0	0	1	0	0	50	0.68
IP_1036367	spleen,	mRNA	0	0	0	0	1	50	0.62
IP_838839	kidney,	ncRNA	0	0	1	0	0	50	0.16
IP_895975	kidney,	mRNA	0	0	1	0	0	51	0.373
IP_1152781	liver,	mRNA	0	0	0	1	0	51	0.353
IP_883139	kidney,	ncRNA	0	0	1	0	0	51	0.176
P56382	liver,brain,kidney,heart,	mRNA	37	134	63	54	0	52	0.981
IP_1119139	kidney,	ncRNA	0	0	1	0	0	52	0.904
IP_954205	heart,	mRNA	0	1	0	0	0	52	0.5
P61014	heart,	mRNA	0	6	0	0	0	52	0.288
IP_967161	kidney,	ncRNA	0	0	1	0	0	52	0.192
IP_1139188	brain,	ncRNA	1	0	0	0	0	52	0.135
IP_2479454	kidney,	ncRNA	0	0	1	0	0	53	0.547
IP_1112052	kidney,	ncRNA	0	0	1	0	0	54	0.574
IP_836824	kidney,	mRNA	0	0	1	0	0	54	0.204
Q9D173	liver,brain,kidney,heart,	mRNA	1	3	2	1	0	55	0.345
IP_1134966	heart,	mRNA	0	1	0	0	0	55	0.327
IP_1017504	kidney,	ncRNA	0	0	1	0	0	56	0.893
IP_827704	spleen,	ncRNA	0	0	0	0	2	56	0.464
IP_1132445	brain,	mRNA	1	0	0	0	0	56	0.143
P0DN34	liver,brain,spleen,kidney,heart,	ncRNA	8	35	55	21	1	57	0.912
NP_001295354.1	liver,kidney,	mRNA	0	0	2	1	0	57	0.211
P56379	liver,brain,spleen,kidney,heart,	mRNA	58	49	100	96	32	58	0.845
Q78IK2	liver,kidney,heart,	mRNA	0	15	25	12	0	58	0.31
P84102	liver,brain,heart,	mRNA	1	1	0	2	0	59	0.983
IP_948478	brain,	ncRNA	10	0	0	0	0	59	0.492
IP_1108991	brain,	mRNA	2	0	0	0	0	59	0.356
IP_1043033	kidney,	mRNA	0	0	1	0	0	59	0.322
IP_2537375	kidney,	ncRNA	0	0	1	0	0	60	0.333
IP_1144797	kidney,	mRNA	0	0	1	0	0	60	0.25
IP_1146539	liver,	mRNA	0	0	0	1	0	60	0.167
II_1139487	spleen,	ncRNA	0	0	0	0	1	61	0.869
II_1146319	heart,	ncRNA	0	1	0	0	0	61	0.574
IP_966175	heart,	mRNA	0	1	0	0	0	61	0.361
IP_1086752	kidney,	mRNA	0	0	1	0	0	61	0.311
P63054	brain,	mRNA	42	0	0	0	0	62	1
IP_828010	liver,	ncRNA	0	0	0	3	0	62	0.339
P17665	liver,brain,spleen,kidney,heart,	mRNA	9	24	26	39	17	63	0.746
IP_1059380	liver,spleen,kidney,	ncRNA	0	0	1	4	2	63	0.714
IP_920557	spleen,	ncRNA	0	0	0	0	1	63	0.444
IP_990343	liver,kidney,	ncRNA	0	0	3	1	0	63	0.333
II_2415475	spleen,	mRNA	0	0	0	0	1	63	0.317
Q8BTE6	liver,	mRNA	0	0	0	1	0	63	0.222
Q8K003	liver,brain,spleen,kidney,heart,	mRNA	5	1	3	2	1	64	1
Q8R1I1	liver,brain,spleen,kidney,heart,	mRNA	14	16	35	18	2	64	0.859
Q9CQS2	spleen,	mRNA	0	0	0	0	2	64	0.172
IP_888872	spleen,	mRNA	0	0	0	0	1	64	0.109
IP_2496680	spleen,	ncRNA	0	0	0	0	1	65	0.108
IP_1000026	kidney,	mRNA	0	0	1	0	0	66	0.576
Q9Z1W5	liver,kidney,	mRNA	0	0	11	108	0	66	0.455
II_888593	liver,	mRNA	0	0	0	1	0	66	0.348
IP_2424601	spleen,	ncRNA	0	0	0	0	1	66	0.091
P03930	liver,kidney,	mRNA	0	0	66	29	0	67	0.612
IP_869206	spleen,	ncRNA	0	0	0	0	1	67	0.552
IP_1019198	liver,brain,	ncRNA	1	0	0	1	0	67	0.418
IP_904027	spleen,	ncRNA	0	0	0	0	2	67	0.403
Q9JMF3	brain,	mRNA	1	0	0	0	0	67	0.328
IP_2483228	kidney,	ncRNA	0	0	1	0	0	67	0.164
IP_948674	kidney,	ncRNA	0	0	1	0	0	67	0.164
IP_976930	spleen,	ncRNA	0	0	0	0	1	67	0.164
O08997	liver,brain,spleen,kidney,heart,	mRNA	28	15	36	43	29	68	0.985
Q80SZ7	liver,	mRNA	0	0	0	5	0	68	0.559
Q6W8Q3	liver,brain,kidney,heart,	mRNA	12	4	1	8	0	68	0.368
A0A0N4SUI7	brain,spleen,kidney,	mRNA	1	0	2	0	1	68	0.324
P62858	kidney,	mRNA	0	0	11	0	0	69	1
II_937858	liver,brain,kidney,	ncRNA	1	0	2	2	0	69	0.696
Q64445	liver,brain,spleen,kidney,heart,	mRNA	21	11	189	101	13	69	0.638
IP_958609	heart,	ncRNA	0	1	0	0	0	69	0.203
IP_961256	spleen,	mRNA	0	0	0	0	2	69	0.203
Q9JJI8	liver,kidney,	mRNA	0	0	2	7	0	70	0.886
P48772	kidney,heart,	mRNA	0	75	4	0	0	70	0.871
IP_920387	liver,	mRNA	0	0	0	1	0	70	0.514
P60897	liver,brain,	mRNA	6	0	0	5	0	70	0.457
IP_830547	brain,	ncRNA	1	0	0	0	0	70	0.3
IP_826110	liver,	ncRNA	0	0	0	1	0	70	0.286
Q06185	brain,	mRNA	3	0	0	0	0	71	1
P63213	brain,spleen,	mRNA	2	0	0	0	2	71	0.268
IP_1134950	heart,	mRNA	0	1	0	0	0	71	0.141
IP_990260	brain,spleen,	ncRNA	1	0	0	0	2	72	0.722
IP_1018469	liver,brain,	ncRNA	3	0	0	1	0	72	0.569
IP_990758	kidney,	ncRNA	0	0	1	0	0	72	0.375
Q91WE4	liver,brain,kidney,	mRNA	2	0	10	21	0	72	0.292
IP_830575	spleen,	ncRNA	0	0	0	0	2	73	0.863
IP_862312	brain,	mRNA	2	0	0	0	0	73	0.438
Q8R1H0	heart,	mRNA	0	1	0	0	0	73	0.315
II_1036545	liver,brain,kidney,	ncRNA	1	0	7	1	0	74	0.973
IP_1142692	liver,brain,spleen,kidney,	ncRNA	1	0	1	1	2	74	0.311
Q9CQN3	liver,kidney,	mRNA	0	0	10	2	0	74	0.216
Q3UTD9	liver,kidney,	mRNA	0	0	7	1	0	74	0.135
IP_1061067	brain,kidney,	ncRNA	1	0	1	0	0	75	0.493
IP_924640	brain,	ncRNA	1	0	0	0	0	75	0.467
Q91VR8	spleen,	mRNA	0	0	0	0	2	75	0.427
IP_926262	spleen,	ncRNA	0	0	0	0	9	75	0.16
Q9D115	kidney,	mRNA	0	0	8	0	0	76	0.987
Q9D8Z2	kidney,	mRNA	0	0	1	0	0	76	0.987
Q9CQZ1	liver,brain,kidney,	mRNA	6	0	2	1	0	76	0.947
Q9CQY9	kidney,heart,	mRNA	0	4	10	0	0	76	0.645
A0A0A6YXQ7	liver,brain,kidney,	mRNA	3	0	1	3	0	76	0.434
IP_990136	spleen,	ncRNA	0	0	0	0	2	76	0.224
Q9DCB1-2	brain,	mRNA	2	0	0	0	0	77	0.974
IP_900041	spleen,	ncRNA	0	0	0	0	2	77	0.597
V9GXC1	liver,brain,spleen,kidney,	mRNA	2	0	1	3	2	77	0.403
V9GX31	liver,spleen,kidney,	mRNA	0	0	1	1	3	77	0.377
IP_1011573	heart,	mRNA	0	2	0	0	0	77	0.208
P60761	brain,spleen,kidney,	mRNA	545	0	6	0	3	78	1
Q6QWF9	brain,	mRNA	1	0	0	0	0	78	0.346
P97816	kidney,	mRNA	0	0	24	0	0	79	0.987
II_1139489	brain,spleen,kidney,heart,	ncRNA	1	1	1	0	2	79	0.418
IP_919052	spleen,	ncRNA	0	0	0	0	2	79	0.241
Q8BGD8	heart,	mRNA	0	3	0	0	0	79	0.228
IP_1072617	kidney,	ncRNA	0	0	2	0	0	79	0.203
II_885711	liver,	ncRNA	0	0	0	1	0	80	0.875
IP_856976	spleen,	ncRNA	0	0	0	0	1	80	0.725
P56393	liver,brain,spleen,kidney,heart,	mRNA	94	91	112	83	12	80	0.7
IP_972261	liver,	ncRNA	0	0	0	1	0	80	0.263
IP_1007962	brain,	ncRNA	1	0	0	0	0	80	0.138
P29595	liver,brain,kidney,heart,	mRNA	9	2	4	3	0	81	0.901
IP_2444178	kidney,	mRNA	0	0	1	0	0	81	0.395
Q4KML4	brain,spleen,kidney,	mRNA	2	0	1	0	10	81	0.346
Q62425	liver,kidney,heart,	mRNA	0	2	8	5	0	82	1
Q99JI1	kidney,heart,	mRNA	0	23	4	0	0	82	0.732
Q9CQ69	liver,brain,kidney,heart,	mRNA	8	58	63	51	0	82	0.659
IP_1032815	brain,	mRNA	1	0	0	0	0	82	0.317
IP_971196	brain,kidney,	ncRNA	1	0	1	0	0	82	0.244
Q9CQR2	liver,brain,spleen,kidney,heart,	mRNA	15	5	68	65	23	83	1
P48771	liver,brain,spleen,kidney,heart,	mRNA	20	9	27	26	7	83	0.723
IP_2505627	liver,	mRNA	0	0	0	1	0	83	0.181
IP_1102041	heart,	mRNA	0	1	0	0	0	83	0.145
IP_1071762	liver,	ncRNA	0	0	0	1	0	83	0.096
Q9CQ91	kidney,	mRNA	0	0	2	0	0	84	0.917
Q9DC77	heart,	mRNA	0	10	0	0	0	85	1
P61961	brain,	mRNA	1	0	0	0	0	85	0.565
IP_989339	liver,spleen,kidney,	ncRNA	0	0	1	1	2	85	0.435
IP_2431703	brain,	mRNA	1	0	0	0	0	85	0.212
P56391	liver,brain,kidney,heart,	mRNA	9	14	9	4	0	86	1
D3Z5S0	liver,	mRNA	0	0	0	1	0	86	0.802
Q923D4	liver,brain,spleen,kidney,	mRNA	9	0	9	4	23	86	0.547
IP_901756	brain,spleen,	ncRNA	1	0	0	0	2	86	0.477
IP_2477871	kidney,	mRNA	0	0	1	0	0	86	0.233
P20491	spleen,	mRNA	0	0	0	0	2	86	0.198
IP_1037716	heart,	ncRNA	0	1	0	0	0	86	0.105
P31786	liver,brain,kidney,	mRNA	2	0	5	2	0	87	1
IP_991787	spleen,	ncRNA	0	0	0	0	4	87	0.414
IP_1110661	kidney,	ncRNA	0	0	2	0	0	87	0.379
IP_873222	heart,	ncRNA	0	3	0	0	0	87	0.356
IP_2407777	spleen,	ncRNA	0	0	0	0	1	87	0.08
IP_827673	brain,	ncRNA	2	0	0	0	0	88	0.489
P56135	liver,kidney,heart,	mRNA	0	16	6	1	0	88	0.477
IP_1015774	spleen,	ncRNA	0	0	0	0	1	88	0.352
E9Q942	brain,	mRNA	4	0	0	0	0	88	0.25
IP_826165	heart,	ncRNA	0	4	0	0	0	88	0.17
IP_1139872	brain,	mRNA	1	0	0	0	0	88	0.114
IP_971403	heart,	ncRNA	0	1	0	0	0	88	0.102
P14069	spleen,	mRNA	0	0	0	0	1	89	0.955
IP_1042284	liver,brain,spleen,	ncRNA	120	0	0	46	120	89	0.685
IP_1042210	liver,brain,	ncRNA	3	0	0	1	0	89	0.483
Q80ZS7	brain,	mRNA	6	0	0	0	0	89	0.472
P99028	liver,brain,kidney,heart,	mRNA	9	18	5	4	0	89	0.449
P27005	liver,spleen,	mRNA	0	0	0	12	42	89	0.337
IP_2455245	liver,	ncRNA	0	0	0	1	0	89	0.315
Q8CF02	liver,	mRNA	0	0	0	3	0	89	0.292
Q8K2T4	liver,kidney,	mRNA	0	0	1	4	0	89	0.292
IP_2462590	liver,	mRNA	0	0	0	1	0	89	0.247
Q9WV98	brain,spleen,	mRNA	2	0	0	0	3	89	0.213
IP_1072519	heart,	ncRNA	0	1	0	0	0	89	0.202
O54962	spleen,	mRNA	0	0	0	0	1	89	0.101
IP_2491042	spleen,	mRNA	0	0	0	0	1	89	0.09
IP_990635	heart,	ncRNA	0	1	0	0	0	89	0.079
IP_1078763	liver,brain,spleen,kidney,	ncRNA	3	0	5	3	2	90	0.989
P09602	liver,brain,spleen,kidney,heart,	ncRNA	85	145	145	46	208	90	0.989
IP_1121384	liver,kidney,	ncRNA	0	0	1	1	0	90	0.8
P62073	brain,spleen,heart,	mRNA	2	3	0	0	1	90	0.389
IP_988812	liver,	ncRNA	0	0	0	1	0	90	0.311
IP_903223	kidney,	ncRNA	0	0	2	0	0	90	0.189
Q8K215	kidney,	mRNA	0	0	2	0	0	91	0.154
Q5XK38	kidney,	mRNA	0	0	1	0	0	92	0.989
P61514	liver,brain,spleen,kidney,heart,	mRNA	12	1	17	34	67	92	0.533
P50114	brain,	mRNA	1	0	0	0	0	92	0.13
IP_827552	liver,	ncRNA	0	0	0	1	0	93	0.28
Q91VW3	liver,brain,spleen,kidney,	mRNA	59	0	22	1	70	93	0.172
IP_989340	liver,brain,	ncRNA	1	0	0	1	0	94	0.67
Q8R1F0	spleen,	mRNA	0	0	0	0	13	94	0.511
G3UZ47	liver,	mRNA	0	0	0	2	0	94	0.298
P56565	heart,	mRNA	0	14	0	0	0	94	0.287
IP_825506	liver,kidney,	ncRNA	0	0	1	1	0	94	0.191
IP_994236	kidney,	mRNA	0	0	1	0	0	94	0.096
IP_1120445	spleen,	ncRNA	0	0	0	0	1	95	0.842
II_1066842	kidney,	ncRNA	0	0	1	0	0	95	0.779
A0A0J9YTR2	liver,kidney,heart,	ncRNA	0	3	3	1	0	95	0.158
P18608	kidney,	mRNA	0	0	1	0	0	96	0.99
P17095-1	spleen,	mRNA	0	0	0	0	26	96	0.958
A3KGL9	brain,spleen,heart,	mRNA	2	1	0	0	1	96	0.948
IP_2554406	spleen,	ncRNA	0	0	0	0	1	96	0.323
P43023	kidney,heart,	mRNA	0	105	2	0	0	97	0.814
P57774	brain,spleen,heart,	mRNA	33	8	0	0	2	97	0.546
IP_897862	brain,heart,	ncRNA	1	1	0	0	0	97	0.505
Q9D823	liver,brain,spleen,	ncRNA	5	0	0	17	88	97	0.474
Q05020	liver,heart,	mRNA	0	3	0	5	0	97	0.268
IP_898701	liver,	mRNA	0	0	0	1	0	97	0.186
Q9WVA2	spleen,	mRNA	0	0	0	0	1	97	0.103
IP_2438407	spleen,	mRNA	0	0	0	0	1	97	0.093
Q62426	liver,brain,spleen,kidney,	mRNA	7	0	13	12	3	98	0.286
P0C8B4	liver,kidney,	mRNA	0	0	1	1	0	98	0.112
Q78TF3	brain,	mRNA	1	0	0	0	0	99	0.949
Q9DCB1	brain,spleen,	mRNA	2	0	0	0	1	99	0.747
Q9CQ75	liver,kidney,heart,	mRNA	0	23	32	8	0	99	0.434
IP_826291	kidney,	ncRNA	0	0	1	0	0	99	0.333
Q8CF66	liver,	mRNA	0	0	0	1	0	99	0.202
P33622	liver,	mRNA	0	0	0	2	0	99	0.141
Q99LT0	brain,kidney,	mRNA	2	0	41	0	0	99	0.121
Q9D6T9	kidney,heart,	mRNA	0	19	27	0	0	100	1
D3Z670	kidney,	mRNA	0	0	1	0	0	100	0.52
Q8JZM2	kidney,	mRNA	0	0	46	0	0	100	0.49
Q9D0J8	liver,kidney,heart,	mRNA	0	1	8	12	0	101	0.545
Q64433	liver,brain,spleen,kidney,heart,	mRNA	15	19	29	14	2	102	1
Q9CQX8	kidney,heart,	mRNA	0	11	25	0	0	102	1
IP_870689	kidney,	ncRNA	0	0	67	0	0	102	0.863
P09813	liver,brain,spleen,kidney,heart,	mRNA	4	73	112	42	18	102	0.824
Q9CY02	spleen,	mRNA	0	0	0	0	10	102	0.765
Q91XC8	liver,spleen,kidney,heart,	mRNA	0	3	38	43	3	102	0.706
IP_922541	brain,	ncRNA	1	0	0	0	0	102	0.127
IP_875659	liver,brain,spleen,kidney,	ncRNA	9	0	1	1	6	103	0.699
P62806	liver,brain,spleen,kidney,heart,	mRNA	6	5	24	21	104	103	0.583
A0A087WQH8	kidney,	mRNA	0	0	18	0	0	103	0.252
IP_1092804	brain,	ncRNA	1	0	0	0	0	103	0.252
IP_1026473	kidney,	ncRNA	0	0	1	0	0	103	0.117
Q8BK30	liver,brain,kidney,heart,	mRNA	10	148	104	54	0	104	0.673
Q9CQZ6	liver,brain,spleen,kidney,	mRNA	1	0	3	3	1	104	0.221
IP_1112494	brain,	ncRNA	1	0	0	0	0	104	0.154
Q3UA95	spleen,	mRNA	0	0	0	0	27	105	0.962
P00015	heart,	mRNA	0	48	0	0	0	105	0.286
P10639	liver,brain,spleen,	mRNA	7	0	0	10	2	105	0.248
IP_1143116	kidney,heart,	ncRNA	0	1	1	0	0	105	0.181
O35143	kidney,	mRNA	0	0	2	0	0	106	0.745
P56375	kidney,heart,	mRNA	0	10	9	0	0	106	0.67
NP_001160015.1	brain,spleen,	mRNA	1	0	0	0	1	106	0.406
Q9CPZ8	brain,kidney,heart,	mRNA	2	1	1	0	0	106	0.113
Q9CQJ1	kidney,	mRNA	0	0	1	0	0	106	0.104
Q9QUH0	liver,kidney,	mRNA	0	0	21	3	0	107	0.514
P26883	brain,spleen,kidney,	mRNA	21	0	4	0	9	108	0.991
P97450	liver,brain,spleen,kidney,heart,	mRNA	28	132	95	28	4	108	0.704
IP_1053598	brain,	ncRNA	1	0	0	0	0	108	0.556
IP_1143170	spleen,	ncRNA	0	0	0	0	3	108	0.435
P48428	liver,spleen,kidney,	mRNA	0	0	3	1	13	108	0.296
Q9D2R6	liver,	mRNA	0	0	0	1	0	108	0.296
Q91WS0	liver,brain,kidney,heart,	mRNA	7	9	1	4	0	108	0.157
IP_1109204	brain,	ncRNA	1	0	0	0	0	109	0.651
Q9D7E4	liver,	mRNA	0	0	0	1	0	109	0.156
IP_874591	kidney,	ncRNA	0	0	2	0	0	110	0.318
P32848	kidney,	mRNA	0	0	1	0	0	110	0.264
P83870	liver,brain,spleen,kidney,heart,	mRNA	24	1	13	8	1	110	0.173
IP_825679	kidney,	ncRNA	0	0	2	0	0	110	0.155
IP_990344	brain,	ncRNA	1	0	0	0	0	110	0.118
Q9CQB4	kidney,	mRNA	0	0	121	0	0	111	1
II_963144	liver,kidney,	ncRNA	0	0	5	1	0	111	0.568
IP_1120444	brain,spleen,kidney,	ncRNA	1	0	1	0	1	111	0.207
IP_948039	spleen,	ncRNA	0	0	0	0	1	111	0.189
Q9CQM1	liver,	mRNA	0	0	0	2	0	111	0.153
Q9D1C3	liver,kidney,heart,	mRNA	0	35	8	4	0	112	0.304
IP_903566	spleen,	ncRNA	0	0	0	0	1	112	0.125
Q9Z1P6	brain,kidney,heart,	mRNA	1	8	10	0	0	113	0.841
P61804	kidney,	mRNA	0	0	2	0	0	113	0.292
Q9EQI5	spleen,	mRNA	0	0	0	0	10	113	0.292
P31725	spleen,	mRNA	0	0	0	0	2	113	0.159
IP_2489092	liver,	ncRNA	0	0	0	1	0	113	0.062
P47955	kidney,	mRNA	0	0	7	0	0	114	0.816
Q9JJU8	liver,spleen,	mRNA	0	0	0	1	5	114	0.281
IP_970184	brain,	ncRNA	1	0	0	0	0	114	0.246
Q9CQN6	liver,kidney,	mRNA	0	0	1	2	0	114	0.184
IP_990449	brain,	ncRNA	1	0	0	0	0	114	0.175
Q9D809	kidney,	mRNA	0	0	2	0	0	114	0.158
IP_826958	liver,	ncRNA	0	0	0	1	0	114	0.132
P34884	liver,brain,spleen,kidney,heart,	mRNA	67	17	82	91	51	115	0.678
P99027	kidney,	mRNA	0	0	18	0	0	115	0.652
IP_1118173	kidney,	mRNA	0	0	4	0	0	115	0.643
P09240	brain,	mRNA	81	0	0	0	0	115	0.635
IP_989003	liver,brain,kidney,heart,	ncRNA	12	1	2	2	0	115	0.626
IP_840413	brain,heart,	ncRNA	35	7	0	0	0	115	0.609
IP_874906	liver,brain,spleen,	ncRNA	3	0	0	1	1	115	0.591
II_929331	brain,	ncRNA	1	0	0	0	0	115	0.539
Q9DAM7	liver,brain,spleen,	mRNA	14	0	0	5	2	115	0.183
P52503	kidney,	mRNA	0	0	52	0	0	116	0.828
P60041	brain,	mRNA	103	0	0	0	0	116	0.793
IP_1017065	liver,	ncRNA	0	0	0	1	0	116	0.233
Q9D211	spleen,	mRNA	0	0	0	0	6	116	0.233
Q60876	liver,brain,kidney,	mRNA	1	0	1	8	0	117	0.179
P62317	spleen,	mRNA	0	0	0	0	6	118	0.695
IP_948852	liver,brain,spleen,kidney,	ncRNA	5	0	1	3	13	118	0.678
Q9CR51	spleen,kidney,	mRNA	0	0	32	0	6	118	0.653
P62774	liver,brain,spleen,kidney,heart,	mRNA	12	2	14	6	4	118	0.263
P62869	brain,spleen,	mRNA	1	0	0	0	1	118	0.127
Q9D1H8	liver,kidney,	mRNA	0	0	3	2	0	118	0.127
Q9D1K2	brain,kidney,	mRNA	9	0	8	0	0	119	0.899
P01887	liver,spleen,kidney,heart,	mRNA	0	4	6	52	31	119	0.832
Q8R404	liver,brain,kidney,heart,	mRNA	15	28	71	23	0	119	0.538
P60867	spleen,	mRNA	0	0	0	0	18	119	0.521
II_969993	spleen,	ncRNA	0	0	0	0	9	120	0.658
Q9CQ54	liver,heart,	mRNA	0	13	0	11	0	120	0.408
P70445	liver,brain,spleen,kidney,heart,	mRNA	11	5	13	10	2	120	0.192
IP_2456248	liver,	ncRNA	0	0	0	1	0	120	0.067
P60840	brain,	mRNA	8	0	0	0	0	121	0.843
P61110	kidney,	mRNA	0	0	2	0	0	121	0.587
IP_1072575	liver,kidney,	ncRNA	0	0	3	2	0	121	0.421
IP_1003954	liver,	mRNA	0	0	0	1	0	121	0.099
Q9D1T5	kidney,	mRNA	0	0	2	0	0	122	0.213
IP_2547733	kidney,	mRNA	0	0	2	0	0	122	0.131
Q6ZWV7	spleen,	mRNA	0	0	0	0	6	123	0.772
Q9CQM5	brain,kidney,	mRNA	5	0	37	0	0	123	0.374
Q64G17	spleen,	mRNA	0	0	0	0	1	123	0.13
Q91X96	liver,brain,	mRNA	4	0	0	1	0	123	0.13
Q9DAK9	brain,kidney,	mRNA	15	0	3	0	0	124	0.71
IP_972476	liver,	ncRNA	0	0	0	2	0	124	0.266
P47212	brain,	mRNA	1	0	0	0	0	124	0.234
IP_2434364	kidney,	ncRNA	0	0	1	0	0	124	0.113
IP_948009	spleen,	ncRNA	0	0	0	0	1	125	0.664
P58064	liver,	mRNA	0	0	0	1	0	125	0.104
P70349	liver,brain,kidney,heart,	mRNA	177	31	92	87	0	126	0.992
P10854	spleen,	mRNA	0	0	0	0	675	126	0.984
Q64478	spleen,	mRNA	0	0	0	0	1	126	0.984
Q64524	spleen,	mRNA	0	0	0	0	55	126	0.905
Q64475	liver,brain,spleen,kidney,	mRNA	1	0	1	4	8	126	0.698
Q8CGP1	liver,spleen,kidney,	mRNA	0	0	10	17	91	126	0.524
IP_871073	kidney,	ncRNA	0	0	3	0	0	126	0.405
IP_970973	kidney,	ncRNA	0	0	1	0	0	126	0.127
P12710	liver,brain,spleen,kidney,	mRNA	24	0	2	1855	9	127	1
Q9D023	liver,kidney,	mRNA	0	0	51	45	0	127	0.661
P70696	spleen,	mRNA	0	0	0	0	5	127	0.654
Q9D1C2	brain,	mRNA	1	0	0	0	0	127	0.205
P11031	liver,brain,spleen,kidney,heart,	mRNA	6	1	3	2	37	127	0.11
P0C0S6	spleen,	mRNA	0	0	0	0	2	128	0.984
Q9D0T1	spleen,	mRNA	0	0	0	0	7	128	0.672
IP_825414	liver,brain,spleen,kidney,heart,	ncRNA	2	1	5	2	2	128	0.578
IP_1020044	liver,spleen,kidney,	ncRNA	0	0	19	11	4	128	0.5
Q3UIU2	kidney,	mRNA	0	0	8	0	0	128	0.344
IP_1119889	kidney,	ncRNA	0	0	1	0	0	128	0.312
Q8BGB5	brain,spleen,	mRNA	2	0	0	0	31	128	0.211
Q8R1M2	liver,brain,spleen,kidney,heart,	mRNA	4	4	32	54	60	129	0.946
Q64523	liver,brain,spleen,kidney,heart,	mRNA	2	9	22	26	52	129	0.876
Q9CQC7	liver,	mRNA	0	0	0	4	0	129	0.217
P56388	brain,	mRNA	3	0	0	0	0	129	0.155
Q8CGP5	liver,brain,spleen,kidney,heart,	mRNA	2	3	23	10	55	130	0.977
Q8CGP7	liver,spleen,kidney,heart,	mRNA	0	5	15	12	59	130	0.977
Q64522	liver,brain,spleen,kidney,	mRNA	2	0	2	3	18	130	0.662
Q9CWW6	liver,spleen,	mRNA	0	0	0	6	2	131	0.435
Q9CQZ5	brain,heart,	mRNA	2	12	0	0	0	131	0.328
Q8K273	liver,kidney,	mRNA	0	0	2	1	0	131	0.092
P55050	liver,	mRNA	0	0	0	50	0	132	0.864
P04117	kidney,heart,	mRNA	0	5	3	0	0	132	0.402
P11404	brain,kidney,heart,	mRNA	25	308	20	0	0	133	1
Q91ZZ3	brain,	mRNA	78	0	0	0	0	133	0.602
Q9DCQ3	liver,	mRNA	0	0	0	1	0	133	0.113
IP_1081770	kidney,	ncRNA	0	0	1	0	0	133	0.105
P63040	brain,	mRNA	33	0	0	0	0	134	0.694
P84086	brain,	mRNA	35	0	0	0	0	134	0.672
Q9DB42	spleen,	mRNA	0	0	0	0	5	134	0.463
Q4VWZ5	heart,	mRNA	0	179	0	0	0	135	0.637
Q9CQN7	liver,	mRNA	0	0	0	2	0	135	0.148
P16045	brain,spleen,kidney,heart,	mRNA	9	1	27	0	7	135	0.126
F6V4G5	kidney,	mRNA	0	0	1	0	0	135	0.119
D6RHS6	brain,kidney,	mRNA	88	0	19	0	0	136	0.875
IP_870782	spleen,	ncRNA	0	0	0	0	1	136	0.449
II_861176	heart,	ncRNA	0	12	0	0	0	137	0.248
Q9CQJ5	kidney,	mRNA	0	0	1	0	0	137	0.175
Q9D8S9	kidney,	mRNA	0	0	2	0	0	137	0.109
Q7TNL9	liver,brain,kidney,heart,	mRNA	21	97	27	83	0	138	0.674
O55042	brain,spleen,heart,	mRNA	95	29	0	0	21	140	0.636
IP_1119806	liver,brain,heart,	ncRNA	1	1	0	1	0	140	0.357
P21460	brain,	mRNA	2	0	0	0	0	140	0.286
D3Z4S3	spleen,	mRNA	0	0	0	0	2	140	0.157
Q9CQR4	liver,kidney,heart,	mRNA	0	34	5	2	0	140	0.129
IP_1012688	spleen,	mRNA	0	0	0	0	1	140	0.1
IP_855484	kidney,	ncRNA	0	0	1	0	0	140	0.093
Q8WUR0	liver,	mRNA	0	0	0	1	0	141	0.546
A0A0A0MQC3	liver,	mRNA	0	0	0	3	0	141	0.468
IP_1131960	brain,	mRNA	1	0	0	0	0	141	0.156
P01942	liver,brain,spleen,kidney,heart,	mRNA	29	125	53	41	174	142	1
Q91VB8	liver,spleen,kidney,heart,	mRNA	0	523	295	302	1856	142	1
Q9CQI3	brain,kidney,	mRNA	16	0	1	0	0	142	0.458
Q9CQI6	spleen,	mRNA	0	0	0	0	2	142	0.127
Q9JJ93	liver,	mRNA	0	0	0	1	0	142	0.063
P27661	liver,brain,spleen,kidney,heart,	mRNA	10	6	31	89	350	143	0.979
P62267	liver,	mRNA	0	0	0	3	0	143	0.294
IP_1021179	liver,kidney,	ncRNA	0	0	1	1	0	143	0.287
IP_857049	liver,spleen,	ncRNA	0	0	0	11	13	143	0.287
Q9CWG9	spleen,	mRNA	0	0	0	0	1	143	0.133
IP_1148198	spleen,	mRNA	0	0	0	0	1	143	0.056
IP_1042203	kidney,heart,	ncRNA	0	2	11	0	0	144	0.236
Q8R3Q6	spleen,	mRNA	0	0	0	0	2	144	0.181
P62843	liver,brain,spleen,kidney,	mRNA	34	0	25	56	78	145	0.455
IP_1092808	liver,kidney,	ncRNA	0	0	4	4	0	145	0.352
NP_001245387.1	liver,kidney,	mRNA	0	0	1	2	0	145	0.29
II_1135118	liver,	ncRNA	0	0	0	8	0	145	0.234
P12787	liver,brain,spleen,kidney,heart,	mRNA	133	330	461	243	5	146	0.753
P56389	kidney,	mRNA	0	0	3	0	0	146	0.288
Q6PGF2	brain,	mRNA	1	0	0	0	0	146	0.089
P02088	liver,brain,spleen,kidney,heart,	mRNA	255	995	739	673	919	147	1
P02089	liver,brain,spleen,kidney,heart,	mRNA	40	98	79	122	268	147	1
P02104	liver,spleen,heart,	mRNA	0	1	0	1	4	147	0.435
P07309	liver,spleen,	mRNA	0	0	0	4	4	147	0.252
P04444	spleen,	mRNA	0	0	0	0	1	147	0.211
Q9D3P8	kidney,	mRNA	0	0	9	0	0	147	0.177
Q62084	liver,brain,spleen,kidney,	mRNA	3	0	2	1	2	147	0.129
Q91VC7	kidney,	mRNA	0	0	1	0	0	147	0.122
P62838	brain,	mRNA	2	0	0	0	0	147	0.102
Q9JMG1	spleen,heart,	mRNA	0	1	0	0	24	148	0.209
P08905	spleen,kidney,	mRNA	0	0	1	0	2	148	0.108
Q8R2K3	spleen,kidney,	mRNA	0	0	4	0	1	148	0.061
Q9JKC6	brain,	mRNA	12	0	0	0	0	149	0.456
IP_918976	spleen,	ncRNA	0	0	0	0	2	151	0.47
O09111	heart,	mRNA	0	4	0	0	0	151	0.245
P51637	heart,	mRNA	0	10	0	0	0	151	0.119
D3YTY6	spleen,	mRNA	0	0	0	0	1	151	0.113
Q80Y14	kidney,	mRNA	0	0	10	0	0	152	0.526
P15532	liver,kidney,	mRNA	0	0	3	2	0	152	0.296
P05125	heart,	mRNA	0	1	0	0	0	152	0.145
Q9CQ92	spleen,	mRNA	0	0	0	0	2	152	0.138
XP_485502.1	liver,kidney,	mRNA	0	0	1	3	0	153	0.464
IP_950192	liver,	ncRNA	0	0	0	1	0	153	0.458
Q9CPU4	kidney,	mRNA	0	0	1	0	0	153	0.144
IP_1020636	brain,spleen,kidney,	ncRNA	43	0	47	0	74	154	0.591
P08228	liver,brain,	mRNA	4	0	0	13	0	154	0.519
P04247	liver,heart,	mRNA	0	296	0	5	0	154	0.065
IP_1142593	spleen,	mRNA	0	0	0	0	1	155	0.677
IP_990711	brain,	ncRNA	69	0	0	0	0	155	0.619
Q8K039	liver,spleen,kidney,	mRNA	0	0	9	1	1	155	0.103
Q9D6U8	liver,heart,	mRNA	0	2	0	3	0	155	0.103
A0A1L1SST0	brain,	mRNA	2	0	0	0	0	156	0.91
P62983	brain,	mRNA	1	0	0	0	0	156	0.551
IP_899761	liver,brain,spleen,kidney,heart,	ncRNA	14	3	12	10	11	156	0.532
IP_830468	liver,spleen,	ncRNA	0	0	0	1	1	156	0.109
IP_1053643	brain,	ncRNA	1	0	0	0	0	159	0.176
IP_947701	spleen,	ncRNA	0	0	0	0	1	159	0.069
G3X9L6	liver,heart,	mRNA	0	234	0	145	0	160	0.875
IP_856101	spleen,kidney,	ncRNA	0	0	1	0	8	160	0.194
Q9R0Q7	spleen,	mRNA	0	0	0	0	1	160	0.119
Q9DCX2	kidney,heart,	mRNA	0	1	2	0	0	161	0.882
IP_1078649	brain,heart,	ncRNA	1	1	0	0	0	161	0.273
Q5EBG6	heart,	mRNA	0	1	0	0	0	162	0.364
O08583-2	spleen,	mRNA	0	0	0	0	1	163	0.859
IP_879390	spleen,	ncRNA	0	0	0	0	1	163	0.393
IP_857373	brain,	ncRNA	1	0	0	0	0	164	0.134
A0A0J9YU08	kidney,	mRNA	0	0	3	0	0	165	0.236
Q9R0P5	brain,spleen,kidney,heart,	mRNA	6	1	7	0	4	165	0.103
Q921P9	brain,	mRNA	1	0	0	0	0	165	0.097
Q9QUR7	liver,brain,spleen,kidney,	mRNA	7	0	6	2	6	165	0.097
P56942	brain,	mRNA	1	0	0	0	0	165	0.091
G3UZJ4	kidney,	mRNA	0	0	92	0	0	166	0.705
Q9CRB8	heart,	mRNA	0	1	0	0	0	166	0.102
Q8BHG9	liver,spleen,kidney,	mRNA	0	0	2	2	8	167	0.192
Q9D3D9	liver,kidney,heart,	mRNA	0	4	5	2	0	168	0.613
Q9DCP9	heart,	mRNA	0	1	0	0	0	168	0.173
P59999	spleen,	mRNA	0	0	0	0	2	168	0.113
Q60772	kidney,	mRNA	0	0	1	0	0	168	0.06
P35385	heart,	mRNA	0	38	0	0	0	169	0.799
Q91WK5	liver,kidney,heart,	mRNA	0	3	18	13	0	170	0.341
Q9QY93	liver,	mRNA	0	0	0	1	0	170	0.176
Q3THJ3	spleen,	mRNA	0	0	0	0	1	170	0.082
Q9ERT9	kidney,	mRNA	0	0	30	0	0	171	0.678
II_960525	heart,	mRNA	0	1	0	0	0	171	0.333
Q3THE2	spleen,	mRNA	0	0	0	0	46	172	0.965
IP_840135	brain,	mRNA	3	0	0	0	0	172	0.616
P60824	spleen,	mRNA	0	0	0	0	5	172	0.413
P51437	spleen,	mRNA	0	0	0	0	3	172	0.163
Q9R1K9	brain,	mRNA	1	0	0	0	0	172	0.099
Q9D735	spleen,kidney,	mRNA	0	0	12	0	27	173	0.486
IP_1092449	liver,spleen,kidney,	ncRNA	0	0	6	1	1	173	0.382
Q5SQY2	kidney,	mRNA	0	0	2	0	0	173	0.237
F6TN03	spleen,	mRNA	0	0	0	0	1	173	0.087
IP_1016765	heart,	ncRNA	0	1	0	0	0	174	0.115
Q9D1M4	brain,	mRNA	1	0	0	0	0	174	0.109
Q9JM62-2	liver,	mRNA	0	0	0	6	0	174	0.092
P23927	heart,	mRNA	0	81	0	0	0	175	0.771
Q9QVP4	heart,	mRNA	0	1	0	0	0	175	0.069
Q9CRB6	brain,spleen,kidney,heart,	mRNA	7	14	2	0	1	176	0.403
IP_1143303	brain,spleen,	ncRNA	1	0	0	0	2	176	0.142
J3QQ10	kidney,	mRNA	0	0	1	0	0	178	0.18
Q283N4	liver,	mRNA	0	0	0	4	0	178	0.18
P11589	liver,kidney,	mRNA	0	0	5	7	0	180	0.772
P84084	kidney,	mRNA	0	0	6	0	0	180	0.222
Q8VE99	brain,	mRNA	1	0	0	0	0	180	0.089
Q3UHX2	brain,spleen,heart,	mRNA	1	9	0	0	6	181	0.646
Q8BSL7	kidney,	mRNA	0	0	3	0	0	181	0.271
P61205	brain,	mRNA	5	0	0	0	0	181	0.188
P84078	kidney,heart,	mRNA	0	2	1	0	0	181	0.122
P09528	brain,spleen,	mRNA	1	0	0	0	1	182	0.143
Q99PR8	heart,	mRNA	0	2	0	0	0	182	0.137
IP_1140490	liver,	mRNA	0	0	0	15	0	183	0.213
Q9CPU0	liver,brain,kidney,heart,	mRNA	7	2	4	32	0	184	0.56
IP_1099974	spleen,	ncRNA	0	0	0	0	1	184	0.342
II_958403	brain,	ncRNA	1	0	0	0	0	184	0.043
Q9JKL4	liver,	mRNA	0	0	0	2	0	185	0.108
Q9DCF9	kidney,	mRNA	0	0	1	0	0	185	0.092
Q8VBW8	liver,kidney,	mRNA	0	0	16	131	0	186	0.903
IP_1042283	liver,brain,	ncRNA	381	0	0	186	0	186	0.86
Q9CY16	heart,	mRNA	0	2	0	0	0	186	0.108
P70296	brain,	mRNA	1	0	0	0	0	187	0.995
IP_1142837	liver,brain,kidney,heart,	mRNA	18	1	3	8	0	187	0.909
Q8CIT0	brain,	mRNA	1	0	0	0	0	187	0.118
P46656	liver,heart,	mRNA	0	4	0	13	0	188	0.234
Q8R5J9	spleen,	mRNA	0	0	0	0	2	188	0.048
Q99LX0	liver,brain,spleen,kidney,heart,	mRNA	4	4	15	34	13	189	0.392
G3X8R0	brain,heart,	mRNA	1	3	0	0	0	189	0.111
Q9R257	liver,spleen,	mRNA	0	0	0	1	1	190	0.826
Q6PGH2	kidney,	mRNA	0	0	2	0	0	190	0.468
P06799	kidney,	mRNA	0	0	1	0	0	190	0.137
Q61686	spleen,kidney,	mRNA	0	0	1	0	1	191	0.461
P62761	brain,	mRNA	2	0	0	0	0	191	0.194
Q14BB9	brain,	mRNA	5	0	0	0	0	191	0.089
P97315	spleen,kidney,	mRNA	0	0	38	0	35	193	0.601
Q9R171	brain,	mRNA	22	0	0	0	0	193	0.088
Q60829	brain,kidney,	mRNA	87	0	11	0	0	194	0.541
P50462	heart,	mRNA	0	35	0	0	0	194	0.443
P62082	spleen,kidney,	mRNA	0	0	2	0	4	194	0.402
P10922	liver,brain,spleen,kidney,heart,	mRNA	6	1	5	1	16	194	0.129
O55022	liver,	mRNA	0	0	0	17	0	195	0.508
IP_828140	brain,	ncRNA	1	0	0	0	0	195	0.503
P70444	kidney,	mRNA	0	0	1	0	0	195	0.092
Q9JK92	liver,heart,	mRNA	0	14	0	7	0	196	0.281
Q921W0	spleen,	mRNA	0	0	0	0	1	196	0.051
Q64697	spleen,	mRNA	0	0	0	0	10	197	0.299
P46414	kidney,	mRNA	0	0	3	0	0	197	0.157
Q61171	brain,heart,	mRNA	10	15	0	0	0	198	0.46
P60904	brain,	mRNA	6	0	0	0	0	198	0.152
O35988	kidney,	mRNA	0	0	5	0	0	198	0.141
Q8BME9	brain,	mRNA	15	0	0	0	0	198	0.081
Q99LU0	spleen,	mRNA	0	0	0	0	7	199	0.467
Q9WVA4	liver,spleen,kidney,heart,	mRNA	0	5	4	7	41	199	0.181
Q9R1Q8	brain,heart,	mRNA	8	1	0	0	0	199	0.126
IP_926854	spleen,	ncRNA	0	0	0	0	1	199	0.116
Q9CPW7	liver,spleen,kidney,	mRNA	0	0	1	1	38	199	0.065
P56873	liver,brain,	mRNA	2	0	0	1	0	199	0.06
IP_891155	kidney,	mRNA	0	0	1	0	0	199	0.04
Q61599	spleen,	mRNA	0	0	0	0	17	200	0.715
O54879	heart,	mRNA	0	2	0	0	0	200	0.285
P28667	liver,spleen,	mRNA	0	0	0	6	2	200	0.15
P60334	liver,	mRNA	0	0	0	1	0	200	0.045
IP_875634	liver,spleen,	ncRNA	0	0	0	2	5	201	0.164
P37804	spleen,heart,	mRNA	0	5	0	0	31	201	0.09
Q2WG77	heart,	mRNA	0	2	0	0	0	201	0.065
XP_006530249.1	heart,	mRNA	0	1	0	0	0	202	0.842
Q9JMG7	brain,spleen,kidney,	mRNA	6	0	1	0	1	202	0.569
IP_1019048	liver,	ncRNA	0	0	0	2	0	203	0.512
Q99PT1	brain,spleen,kidney,	mRNA	2	0	1	0	1	204	0.049
A0A087WQ89	kidney,	mRNA	0	0	4	0	0	206	0.34
P26687	kidney,	mRNA	0	0	1	0	0	206	0.092
P85094	kidney,	mRNA	0	0	1	0	0	206	0.092
Q8CI43	brain,heart,	mRNA	3	1	0	0	0	207	0.159
P51150	spleen,	mRNA	0	0	0	0	3	207	0.15
IP_2549201	brain,	ncRNA	1	0	0	0	0	207	0.126
Q60771	brain,	mRNA	34	0	0	0	0	207	0.126
Q9DCT8	brain,spleen,kidney,heart,	mRNA	31	81	41	0	31	208	0.505
Q5SYH2	kidney,	mRNA	0	0	2	0	0	208	0.053
D3Z1V4	brain,	mRNA	54	0	0	0	0	209	0.995
P30681	spleen,	mRNA	0	0	0	0	76	210	0.99
P19157	liver,brain,	mRNA	1	0	0	13	0	210	0.714
IP_1121285	spleen,	ncRNA	0	0	0	0	3	211	0.763
P15864	liver,spleen,kidney,heart,	mRNA	0	16	14	13	156	212	0.561
II_1103994	liver,	ncRNA	0	0	0	1	0	212	0.519
P12961	brain,	mRNA	56	0	0	0	0	212	0.481
Q9JJW0	kidney,	mRNA	0	0	2	0	0	212	0.283
Q9DB20	heart,	mRNA	0	37	0	0	0	213	0.319
A0A0G2JGJ1	kidney,	mRNA	0	0	11	0	0	213	0.216
P43275	liver,spleen,	mRNA	0	0	0	1	109	213	0.207
IP_1111537	heart,	ncRNA	0	3	0	0	0	213	0.202
Q8BJF9	kidney,heart,	mRNA	0	3	2	0	0	213	0.197
IP_828334	kidney,	ncRNA	0	0	1	0	0	214	0.393
XP_003945456.1	heart,	mRNA	0	3	0	0	0	214	0.159
Q8JZX9	liver,spleen,	mRNA	0	0	0	2	4	214	0.112
P62827	spleen,heart,	mRNA	0	9	0	0	12	216	0.343
Q14AA6	spleen,	mRNA	0	0	0	0	23	216	0.245
P24369	spleen,	mRNA	0	0	0	0	1	216	0.046
Q9CR57	liver,spleen,kidney,	mRNA	0	0	3	17	2	217	0.424
Q9D8X2	spleen,kidney,	mRNA	0	0	2	0	5	217	0.217
Q99LP6	liver,kidney,	mRNA	0	0	2	3	0	217	0.111
P19639	liver,	mRNA	0	0	0	5	0	218	0.289
Q7TQD2	brain,spleen,heart,	mRNA	181	4	0	0	2	218	0.22
P10833	heart,	mRNA	0	1	0	0	0	218	0.106
P43274	liver,brain,spleen,kidney,heart,	mRNA	32	33	19	37	453	219	0.589
Q9D7S9	liver,brain,spleen,	mRNA	22	0	0	1	15	219	0.05
P43277	liver,brain,spleen,kidney,heart,	mRNA	2	2	5	8	171	221	0.398
Q62093	liver,brain,spleen,kidney,	mRNA	5	0	9	6	105	221	0.226
Q9ESP1	liver,spleen,	mRNA	0	0	0	5	3	221	0.118
IP_872893	kidney,	ncRNA	0	0	1	0	0	222	0.383
P43276	spleen,kidney,	mRNA	0	0	2	0	195	223	0.924
Q9R0P9	brain,	mRNA	177	0	0	0	0	223	0.897
Q9D8B3	liver,brain,spleen,kidney,heart,	mRNA	14	11	2	8	51	224	0.129
Q8BGU2	brain,	mRNA	22	0	0	0	0	224	0.071
Q9DC70	heart,	mRNA	0	1	0	0	0	224	0.058
O70251	liver,brain,	mRNA	15	0	0	4	0	225	0.578
P50518	brain,	mRNA	28	0	0	0	0	226	0.513
Q91XV3	brain,kidney,	mRNA	24	0	2	0	0	226	0.491
Q9D0A3	kidney,	mRNA	0	0	2	0	0	226	0.111
P00848	liver,kidney,heart,	mRNA	0	4	1	4	0	226	0.058
Q9CQF3	spleen,	mRNA	0	0	0	0	1	227	0.203
P00405	liver,kidney,heart,	mRNA	0	17	11	3	0	227	0.132
IP_825063	kidney,	ncRNA	0	0	2	0	0	227	0.062
Q3UXB0	spleen,	mRNA	0	0	0	0	1	228	0.039
Q9JHS9	brain,spleen,kidney,	mRNA	6	0	3	0	2	229	0.14
Q9CXW3	liver,	mRNA	0	0	0	1	0	229	0.07
XP_006503448.1	spleen,	mRNA	0	0	0	0	1	231	0.61
Q9WTP6-2	kidney,	mRNA	0	0	2	0	0	232	0.099
Q5SXJ8	brain,	mRNA	1	0	0	0	0	235	0.077
P51859	liver,brain,spleen,kidney,	mRNA	3	0	3	3	3	237	0.207
XP_017169244.1	kidney,	mRNA	0	0	1	0	0	237	0.097
Q9ERU3	kidney,	mRNA	0	0	1	0	0	237	0.093
Q60692	liver,brain,kidney,heart,	mRNA	43	27	25	27	0	238	0.387
Q71FD5	kidney,	mRNA	0	0	4	0	0	238	0.164
Q8CHQ9	liver,	mRNA	0	0	0	13	0	238	0.088
Q8C845	brain,	mRNA	1	0	0	0	0	240	0.317
Q9DAV8	liver,	mRNA	0	0	0	1	0	240	0.267
Q9Z2U1	brain,	mRNA	1	0	0	0	0	241	0.108
B2RVL6	spleen,	mRNA	0	0	0	0	1	241	0.104
Q9Z1Q5	spleen,	mRNA	0	0	0	0	1	241	0.054
Q9D198	spleen,	mRNA	0	0	0	0	1	242	0.198
Q8BH93	liver,brain,heart,	mRNA	12	1	0	4	0	242	0.066
Q9CQE8	liver,brain,	mRNA	2	0	0	1	0	244	0.049
Q61335	liver,	mRNA	0	0	0	6	0	245	0.049
Q3UN88	spleen,kidney,heart,	mRNA	0	9	3	0	17	246	0.5
P07146	brain,	mRNA	2	0	0	0	0	246	0.061
O35381	liver,brain,spleen,kidney,	mRNA	14	0	5	8	9	247	0.3
P61982	brain,	mRNA	7	0	0	0	0	247	0.267
P57746	brain,	mRNA	5	0	0	0	0	247	0.138
E9Q0B3	spleen,	mRNA	0	0	0	0	1	247	0.049
Q9D6J6	liver,brain,kidney,heart,	mRNA	1	25	3	1	0	248	0.109
Q6IRU2	liver,spleen,kidney,heart,	mRNA	0	1	10	2	5	248	0.069
Q8R0A0	spleen,	mRNA	0	0	0	0	3	249	0.205
Q99PL5-10	liver,	mRNA	0	0	0	23	0	250	0.668
Q9CYW4	liver,	mRNA	0	0	0	2	0	251	0.032
IP_949310	liver,	ncRNA	0	0	0	1	0	252	0.095
Q8QZT2	brain,	mRNA	1	0	0	0	0	252	0.052
O70250	heart,	mRNA	0	6	0	0	0	253	0.206
Q9QYB1	spleen,	mRNA	0	0	0	0	2	253	0.047
Q9DBJ1	liver,brain,spleen,kidney,	mRNA	82	0	7	27	3	254	0.543
P04925	brain,	mRNA	40	0	0	0	0	254	0.134
Q9CQC5	brain,spleen,kidney,heart,	mRNA	3	2	2	0	3	254	0.079
IP_827260	spleen,	ncRNA	0	0	0	0	1	254	0.063
Q9DCM0	kidney,	mRNA	0	0	1	0	0	254	0.055
P62259	brain,	mRNA	12	0	0	0	0	255	0.522
O08583	liver,spleen,kidney,	mRNA	0	0	15	8	130	255	0.345
Q9DAY9	liver,	mRNA	0	0	0	1	0	257	0.436
P62918	liver,spleen,	mRNA	0	0	0	12	37	257	0.179
P20108	heart,	mRNA	0	3	0	0	0	257	0.086
Q9QXV0	brain,heart,	mRNA	47	1	0	0	0	258	0.109
P97376	spleen,	mRNA	0	0	0	0	5	258	0.085
Q91WN1	spleen,	mRNA	0	0	0	0	4	259	0.162
P16015	liver,	mRNA	0	0	0	237	0	260	0.481
P00920	liver,brain,spleen,kidney,heart,	mRNA	19	13	45	8	48	260	0.119
Q9ERB0	brain,spleen,	mRNA	1	0	0	0	2	260	0.081
Q91XF0	liver,brain,kidney,	mRNA	2	0	5	18	0	261	0.632
IP_899901	kidney,	ncRNA	0	0	1	0	0	261	0.467
P28293	spleen,	mRNA	0	0	0	0	3	261	0.119
P00416	liver,brain,heart,	mRNA	3	5	0	1	0	261	0.031
Q9D6S7	kidney,	mRNA	0	0	13	0	0	262	0.076
Q61792	liver,brain,	mRNA	7	0	0	1	0	263	0.281
Q9DCT2	heart,	mRNA	0	6	0	0	0	263	0.167
Q00623	liver,spleen,kidney,heart,	mRNA	0	55	10	21	25	264	0.538
P99026	liver,brain,spleen,kidney,	mRNA	8	0	7	5	2	264	0.201
P40936	liver,	mRNA	0	0	0	2	0	264	0.11
Q3UP87	spleen,	mRNA	0	0	0	0	4	265	0.098
Q9D172	liver,brain,kidney,heart,	mRNA	1	35	24	20	0	266	0.361
P22005	brain,	mRNA	8	0	0	0	0	268	0.366
Q61166	brain,spleen,	mRNA	8	0	0	0	1	268	0.09
Q9D4C5	liver,	mRNA	0	0	0	2	0	268	0.063
O88456	spleen,	mRNA	0	0	0	0	10	269	0.327
IP_991364	kidney,	ncRNA	0	0	1	0	0	269	0.156
Q02013	kidney,heart,	mRNA	0	3	1	0	0	269	0.048
Q3V0I2	brain,	mRNA	1	0	0	0	0	269	0.048
Q9DC07	brain,	mRNA	73	0	0	0	0	270	0.689
Q07079	brain,heart,	mRNA	1	1	0	0	0	271	0.041
Q9CR68	liver,brain,spleen,kidney,heart,	mRNA	32	110	151	59	1	274	0.285
Q9WU84	liver,kidney,	mRNA	0	0	1	11	0	274	0.193
Q9ER00	brain,	mRNA	2	0	0	0	0	274	0.077
Q9CZ04	liver,brain,kidney,	mRNA	1	0	24	9	0	275	0.105
Q9CR95	liver,	mRNA	0	0	0	4	0	275	0.058
Q8CGF5	liver,brain,	mRNA	2	0	0	4	0	276	0.054
Q9EQU5-2	liver,brain,spleen,kidney,heart,	mRNA	26	2	41	42	102	277	0.39
Q8BG34	kidney,	mRNA	0	0	1	0	0	277	0.065
O70433	brain,kidney,heart,	mRNA	8	26	1	0	0	279	0.43
IP_1093794	brain,	ncRNA	1	0	0	0	0	280	0.2
F6TUL9	liver,	mRNA	0	0	0	1	0	280	0.104
IP_901156	spleen,	ncRNA	0	0	0	0	2	281	0.402
Q5EBJ4	brain,	mRNA	3	0	0	0	0	281	0.278
Q8CIL4	spleen,	mRNA	0	0	0	0	2	281	0.093
Q8BGL3	liver,	mRNA	0	0	0	4	0	282	0.128
P28230	liver,	mRNA	0	0	0	13	0	283	0.099
Q99020	liver,spleen,kidney,	mRNA	0	0	1	2	9	285	0.242
Q9CWS0	brain,kidney,	mRNA	3	0	1	0	0	285	0.098
Q8BUY5	heart,	mRNA	0	1	0	0	0	285	0.035
Q99KR3	liver,kidney,	mRNA	0	0	66	22	0	288	0.181
XP_017177336.1	brain,	mRNA	6	0	0	0	0	288	0.108
P61264	brain,	mRNA	1	0	0	0	0	288	0.045
Q9D819	liver,brain,	mRNA	1	0	0	4	0	289	0.159
Q8CDN6	liver,brain,kidney,	mRNA	1	0	5	23	0	289	0.131
P42125	liver,spleen,heart,	mRNA	0	15	0	10	3	289	0.09
Q5SS90	kidney,	mRNA	0	0	22	0	0	291	0.522
IP_1042067	liver,	ncRNA	0	0	0	1	0	291	0.299
Q9D338	heart,	mRNA	0	1	0	0	0	292	0.055
P47878	kidney,	mRNA	0	0	1	0	0	292	0.041
Q91XB7	liver,heart,	mRNA	0	1	0	4	0	293	0.055
O08600	liver,	mRNA	0	0	0	1	0	294	0.068
Q3UZZ6	liver,kidney,	mRNA	0	0	19	3	0	295	0.058
Q9QZN4	liver,	mRNA	0	0	0	2	0	295	0.054
O88271	liver,spleen,	mRNA	0	0	0	2	3	295	0.047
Q9D939	kidney,	mRNA	0	0	52	0	0	296	0.243
IP_1025516	liver,	ncRNA	0	0	0	1	0	297	0.266
Q922Y1	liver,spleen,	mRNA	0	0	0	1	5	297	0.067
P52196	liver,	mRNA	0	0	0	2	0	297	0.044
P48962	liver,spleen,kidney,heart,	mRNA	0	12	16	1	1	298	0.091
P17751	liver,brain,kidney,heart,	mRNA	6	3	12	6	0	299	0.612
Q64374	liver,	mRNA	0	0	0	32	0	299	0.201
Q8BHI7	liver,kidney,	mRNA	0	0	2	104	0	299	0.094
O88569-3	liver,	mRNA	0	0	0	1	0	301	0.678
Q9QZH3	spleen,	mRNA	0	0	0	0	1	301	0.103
P47941	liver,	mRNA	0	0	0	2	0	303	0.043
E9QMD2	brain,	mRNA	2	0	0	0	0	304	0.043
Q08093	spleen,	mRNA	0	0	0	0	11	305	0.289
A2A7W0	spleen,	mRNA	0	0	0	0	3	305	0.128
Q9DCV4	heart,	mRNA	0	3	0	0	0	305	0.092
Q9CX86	liver,brain,spleen,kidney,heart,	mRNA	4	3	6	1	67	305	0.046
Q99M28	spleen,	mRNA	0	0	0	0	1	305	0.03
Q9WUU7	spleen,kidney,	mRNA	0	0	1	0	6	306	0.108
Q8VIM4	kidney,	mRNA	0	0	8	0	0	307	0.313
Q922Q8	liver,	mRNA	0	0	0	1	0	307	0.293
O70579	liver,kidney,	mRNA	0	0	7	1	0	307	0.036
Q8C142	liver,	mRNA	0	0	0	1	0	308	0.042
II_943705	kidney,	ncRNA	0	0	1	0	0	309	0.139
P26645	liver,brain,spleen,kidney,	mRNA	3	0	17	8	9	309	0.113
Q7M708	liver,	mRNA	0	0	0	1	0	310	0.065
P34984	heart,	mRNA	0	1	0	0	0	310	0.045
Q9EQ91	liver,	mRNA	0	0	0	1	0	311	0.084
Q8K1Z0	liver,kidney,heart,	mRNA	0	14	1	4	0	313	0.128
Q61425	liver,brain,kidney,heart,	mRNA	1	139	111	122	0	314	0.404
Q62277	brain,	mRNA	2	0	0	0	0	314	0.156
Q9CPX6	spleen,	mRNA	0	0	0	0	5	314	0.124
Q9Z2H7	kidney,	mRNA	0	0	17	0	0	314	0.086
Q91V76	kidney,	mRNA	0	0	35	0	0	315	0.314
D3Z6W3	heart,	mRNA	0	1	0	0	0	317	0.054
Q91XE4	kidney,	mRNA	0	0	5	0	0	318	0.182
Q8BHC0	liver,	mRNA	0	0	0	5	0	318	0.069
Q9CR42	heart,	mRNA	0	1	0	0	0	319	0.038
NP_001159443.1	spleen,	mRNA	0	0	0	0	2	320	0.331
Q9Z1D1	spleen,	mRNA	0	0	0	0	7	320	0.2
Q3V132	liver,	mRNA	0	0	0	1	0	320	0.062
P26516	spleen,	mRNA	0	0	0	0	1	321	0.047
P42669	spleen,	mRNA	0	0	0	0	1	321	0.031
Q99JR1	kidney,	mRNA	0	0	118	0	0	322	0.484
P62960	kidney,	mRNA	0	0	7	0	0	322	0.363
Q8C3W1	spleen,	mRNA	0	0	0	0	3	322	0.109
O89100	spleen,	mRNA	0	0	0	0	2	322	0.099
Q91WT7	liver,	mRNA	0	0	0	1	0	323	0.115
IP_1051751	spleen,	ncRNA	0	0	0	0	1	323	0.056
O35295	spleen,	mRNA	0	0	0	0	1	324	0.034
Q9D0M3	kidney,	mRNA	0	0	4	0	0	325	0.132
Q05117	spleen,	mRNA	0	0	0	0	3	327	0.147
D3Z636	kidney,	mRNA	0	0	4	0	0	329	0.094
Q99JF8-2	spleen,	mRNA	0	0	0	0	40	331	0.432
Q20BD0	spleen,kidney,	mRNA	0	0	15	0	140	332	0.69
O35685	spleen,	mRNA	0	0	0	0	3	332	0.133
Q6GV12	liver,	mRNA	0	0	0	1	0	332	0.039
IP_1142819	liver,	ncRNA	0	0	0	1	0	333	0.423
Q99LC5	liver,brain,spleen,kidney,heart,	mRNA	2	67	22	29	1	333	0.228
IP_972567	spleen,	ncRNA	0	0	0	0	1	333	0.081
P06797	brain,	mRNA	16	0	0	0	0	334	0.189
IP_988848	heart,	ncRNA	0	2	0	0	0	335	0.299
IP_1052821	liver,	ncRNA	0	0	0	3	0	335	0.227
Q9CQ62	liver,kidney,heart,	mRNA	0	33	2	6	0	335	0.155
Q99L13	liver,kidney,	mRNA	0	0	2	14	0	335	0.099
Q14B01	spleen,	mRNA	0	0	0	0	1	337	0.039
Q9QXD6	kidney,	mRNA	0	0	5	0	0	338	0.213
Q8BK64	liver,	mRNA	0	0	0	3	0	338	0.065
Q8R4N0	heart,	mRNA	0	2	0	0	0	338	0.056
P10605	liver,brain,spleen,kidney,heart,	mRNA	2	4	3	11	4	339	0.327
IP_1110766	brain,	ncRNA	1	0	0	0	0	339	0.189
Q9QYJ3	spleen,	mRNA	0	0	0	0	3	340	0.194
Q6P6J9	liver,	mRNA	0	0	0	1	0	344	0.041
Q5NC45	brain,	mRNA	1	0	0	0	0	344	0.038
P55264-2	liver,	mRNA	0	0	0	2	0	345	0.101
Q9ESF4	brain,	mRNA	1	0	0	0	0	345	0.038
Q9WUM5	liver,kidney,heart,	mRNA	0	86	2	1	0	346	0.22
Q9DC33	spleen,	mRNA	0	0	0	0	1	346	0.078
Q69ZC8	spleen,	mRNA	0	0	0	0	2	346	0.055
Q6NSQ9	kidney,	mRNA	0	0	2	0	0	346	0.055
Q99L27	spleen,	mRNA	0	0	0	0	3	348	0.069
Q9CYA0	liver,	mRNA	0	0	0	4	0	350	0.077
Q9CYN9	brain,kidney,	mRNA	1	0	1	0	0	350	0.051
Q91WK2	spleen,kidney,	mRNA	0	0	2	0	1	352	0.04
Q6PIU9	kidney,	mRNA	0	0	8	0	0	354	0.133
P11725	liver,	mRNA	0	0	0	6	0	354	0.119
P70441	liver,brain,spleen,kidney,	mRNA	2	0	174	28	3	355	0.175
Q8R409	kidney,	mRNA	0	0	5	0	0	356	0.124
P60335	liver,kidney,	mRNA	0	0	51	2	0	356	0.051
Q64442	liver,kidney,	mRNA	0	0	10	50	0	357	0.378
P11930	kidney,	mRNA	0	0	4	0	0	357	0.104
P35576	liver,kidney,	mRNA	0	0	7	7	0	357	0.034
IP_876129	liver,	ncRNA	0	0	0	1	0	358	0.184
Q9ES83	heart,	mRNA	0	5	0	0	0	358	0.067
Q99KV1	spleen,	mRNA	0	0	0	0	2	358	0.061
Q9D051	liver,brain,kidney,heart,	mRNA	4	9	4	2	0	359	0.05
A2AMM0	heart,	mRNA	0	22	0	0	0	362	0.343
Q9R1J0	liver,kidney,	mRNA	0	0	2	20	0	362	0.058
Q91Y97	liver,kidney,	mRNA	0	0	306	399	0	364	0.527
Q8BZT5	kidney,	mRNA	0	0	1	0	0	364	0.027
P01900	spleen,	mRNA	0	0	0	0	1	365	0.027
Q9D5V6	kidney,	mRNA	0	0	1	0	0	365	0.027
P01902	spleen,	mRNA	0	0	0	0	3	368	0.06
Q8C7G5	liver,	mRNA	0	0	0	1	0	368	0.038
O35926	brain,	mRNA	1	0	0	0	0	369	0.03
Q9JJX7	liver,	mRNA	0	0	0	3	0	370	0.097
IP_1099887	brain,spleen,	mRNA	1	0	0	0	1	372	0.79
Q9EPC1	liver,kidney,	mRNA	0	0	16	2	0	372	0.145
IP_2477875	heart,	mRNA	0	1	0	0	0	373	0.265
P15105	liver,kidney,	mRNA	0	0	1	10	0	373	0.18
Q61694	liver,	mRNA	0	0	0	1	0	373	0.123
XP_006509109.1	kidney,	mRNA	0	0	1	0	0	373	0.046
Q91V04	liver,	mRNA	0	0	0	15	0	374	0.059
P63268	spleen,	mRNA	0	0	0	0	50	376	0.444
Q8BFZ3	liver,brain,kidney,	mRNA	2	0	1	2	0	376	0.263
P68134	heart,	mRNA	0	6	0	0	0	377	0.714
Q9QYY9	liver,	mRNA	0	0	0	4	0	377	0.069
Q924Z4	liver,	mRNA	0	0	0	29	0	380	0.039
P07310	heart,	mRNA	0	87	0	0	0	381	0.483
Q04447	brain,	mRNA	57	0	0	0	0	381	0.402
P00158	liver,spleen,kidney,heart,	mRNA	0	5	35	9	1	381	0.047
Q9Z1G3	brain,	mRNA	1	0	0	0	0	382	0.073
Q61733	heart,	mRNA	0	1	0	0	0	384	0.042
P62334	liver,heart,	mRNA	0	20	0	4	0	389	0.054
P35486	liver,brain,kidney,heart,	mRNA	2	6	2	3	0	390	0.046
A2ARS0	brain,	mRNA	1	0	0	0	0	390	0.041
O54724	spleen,kidney,heart,	mRNA	0	22	2	0	4	392	0.298
P31938	liver,kidney,	mRNA	0	0	11	3	0	393	0.051
P06728	kidney,	mRNA	0	0	1	0	0	395	0.066
Q3TSG4	kidney,	mRNA	0	0	4	0	0	395	0.053
Q91X83	liver,	mRNA	0	0	0	25	0	396	0.106
Q8BWT1	liver,kidney,heart,	mRNA	0	19	17	61	0	397	0.612
Q9Z0M5	kidney,	mRNA	0	0	1	0	0	397	0.03
Q99PL5-5	liver,	mRNA	0	0	0	5	0	398	0.796
Q76KJ5	spleen,	mRNA	0	0	0	0	1	399	0.023
Q99JF5	kidney,	mRNA	0	0	11	0	0	401	0.162
Q9D8U8	liver,brain,spleen,kidney,	mRNA	1	0	2	2	2	404	0.047
Q9D0K1	liver,	mRNA	0	0	0	2	0	405	0.054
Q62465	spleen,	mRNA	0	0	0	0	1	406	0.057
Q9JL35	liver,kidney,heart,	mRNA	0	1	13	18	0	406	0.054
O35490	liver,	mRNA	0	0	0	81	0	407	0.319
Q8R0K9	spleen,	mRNA	0	0	0	0	1	410	0.017
Q00896	liver,spleen,kidney,heart,	mRNA	0	11	14	49	4	412	0.289
Q9QYJ0	spleen,	mRNA	0	0	0	0	1	412	0.066
A0A0R4J0X5	liver,brain,kidney,heart,	mRNA	2	8	27	27	0	413	0.252
P22599	liver,brain,spleen,kidney,heart,	mRNA	2	12	20	38	16	413	0.228
Q00897	liver,heart,	mRNA	0	19	0	50	0	413	0.196
Q00898	liver,brain,spleen,kidney,heart,	mRNA	2	2	2	15	1	413	0.172
Q9CZC8	brain,	mRNA	2	0	0	0	0	414	0.164
O88844	liver,brain,kidney,	mRNA	1	0	4	8	0	414	0.14
Q9Z2E1	spleen,	mRNA	0	0	0	0	8	414	0.092
Q3UFY8	kidney,	mRNA	0	0	1	0	0	414	0.034
P54728	spleen,kidney,	mRNA	0	0	7	0	1	416	0.024
P15089	spleen,heart,	mRNA	0	4	0	0	8	417	0.264
P09411	liver,brain,	mRNA	1	0	0	1	0	417	0.24
P19324	spleen,kidney,	mRNA	0	0	3	0	12	417	0.216
Q91W90	liver,	mRNA	0	0	0	6	0	417	0.137
P09041	brain,	mRNA	1	0	0	0	0	417	0.077
P07759	liver,spleen,kidney,heart,	mRNA	0	4	13	33	12	418	0.251
P30275	brain,	mRNA	1	0	0	0	0	418	0.117
Q63918	liver,spleen,kidney,heart,	mRNA	0	23	2	4	8	418	0.074
Q6P8J7	heart,	mRNA	0	6	0	0	0	419	0.224
Q9D8E6	liver,spleen,kidney,	mRNA	0	0	9	16	25	419	0.165
O09043	liver,spleen,kidney,	mRNA	0	0	49	6	4	419	0.084
Q5HZI2	brain,	mRNA	1	0	0	0	0	419	0.029
P45952	heart,	mRNA	0	2	0	0	0	421	0.097
P05784	liver,kidney,	mRNA	0	0	7	174	0	423	0.21
Q8K3X6	kidney,	mRNA	0	0	1	0	0	423	0.026
Q8QZT1	liver,kidney,heart,	mRNA	0	6	6	3	0	424	0.217
XP_017176564.1	liver,kidney,	mRNA	0	0	13	1	0	424	0.071
A0A0J9YTY0	liver,brain,spleen,	mRNA	1	0	0	5	1	425	0.073
P40749	brain,	mRNA	1	0	0	0	0	425	0.021
P30935	liver,	mRNA	0	0	0	1	0	428	0.063
P03995	brain,	mRNA	7	0	0	0	0	430	0.044
A0A0R4J083	kidney,	mRNA	0	0	1	0	0	430	0.035
IP_1023661	liver,	ncRNA	0	0	0	13	0	432	0.275
P50247	liver,	mRNA	0	0	0	17	0	432	0.275
O08677-2	kidney,	mRNA	0	0	19	0	0	432	0.09
Q6S9I0	heart,	mRNA	0	1	0	0	0	433	0.079
Q9DBG5	liver,kidney,heart,	mRNA	0	6	5	8	0	437	0.085
C0HKD8	brain,spleen,kidney,	mRNA	10	0	10	0	3	439	0.134
XP_017172188.1	liver,	mRNA	0	0	0	1	0	439	0.059
Q8R0P8	kidney,	mRNA	0	0	1	0	0	439	0.018
P62192	liver,brain,heart,	mRNA	1	2	0	3	0	440	0.161
Q6PEV3	brain,	mRNA	2	0	0	0	0	440	0.048
Q61644	brain,	mRNA	86	0	0	0	0	441	0.492
I7HPW4	kidney,	mRNA	0	0	1	0	0	441	0.045
Q60749	spleen,	mRNA	0	0	0	0	3	443	0.147
Q3UPH1	kidney,	mRNA	0	0	8	0	0	443	0.093
Q9D6F9	brain,kidney,	mRNA	27	0	2	0	0	444	0.615
P99024	brain,spleen,	mRNA	36	0	0	0	3	444	0.604
IP_2419436	liver,	mRNA	0	0	0	1	0	444	0.023
Q9CWF2	brain,	mRNA	8	0	0	0	0	445	0.645
P68372	kidney,	mRNA	0	0	11	0	0	445	0.333
Q7TMM9	liver,brain,	mRNA	10	0	0	3	0	445	0.191
Q922F4	brain,	mRNA	6	0	0	0	0	447	0.456
Q62376	spleen,	mRNA	0	0	0	0	1	448	0.112
P68373	liver,	mRNA	0	0	0	1	0	449	0.125
Q9ERD7	brain,kidney,	mRNA	2	0	1	0	0	450	0.489
Q61029	spleen,	mRNA	0	0	0	0	5	452	0.611
Q920A5	spleen,kidney,	mRNA	0	0	9	0	1	452	0.051
Q9QYR9	brain,	mRNA	1	0	0	0	0	453	0.17
Q9DB77	liver,kidney,heart,	mRNA	0	43	14	5	0	453	0.11
Q6PGH4	kidney,	mRNA	0	0	1	0	0	453	0.024
Q9ESL4-2	heart,	mRNA	0	5	0	0	0	454	0.066
Q99JB7	kidney,	mRNA	0	0	1	0	0	458	0.055
P03911	kidney,	mRNA	0	0	2	0	0	459	0.028
Q91X72	liver,heart,	mRNA	0	1	0	1	0	460	0.089
O89053	spleen,	mRNA	0	0	0	0	12	461	0.273
Q99JZ7	liver,	mRNA	0	0	0	2	0	461	0.059
P97821	liver,spleen,	mRNA	0	0	0	2	2	462	0.017
Q9R013	kidney,	mRNA	0	0	1	0	0	462	0.017
P62631	brain,spleen,heart,	mRNA	15	80	0	0	1	463	0.637
P26339	brain,	mRNA	9	0	0	0	0	463	0.153
Q9CZU6	heart,	mRNA	0	88	0	0	0	464	0.739
P20152	liver,brain,spleen,kidney,heart,	mRNA	15	52	9	44	173	466	0.174
Q9JIH2	spleen,	mRNA	0	0	0	0	8	466	0.058
Q3U422	spleen,kidney,	mRNA	0	0	16	0	1	468	0.115
P31001	spleen,heart,	mRNA	0	79	0	0	5	469	0.203
Q8BGH2	heart,	mRNA	0	1	0	0	0	469	0.038
Q99LH2	liver,kidney,	mRNA	0	0	16	7	0	473	0.032
Q9D1A2	brain,spleen,kidney,	mRNA	6	0	26	0	2	475	0.12
Q8VDD8	brain,spleen,	mRNA	1	0	0	0	1	475	0.051
P21614	kidney,	mRNA	0	0	5	0	0	476	0.122
P29788	liver,	mRNA	0	0	0	3	0	478	0.056
O35114	liver,heart,	mRNA	0	15	0	1	0	478	0.033
Q9CZ13	heart,	mRNA	0	8	0	0	0	480	0.117
Q99JG2	brain,	mRNA	2	0	0	0	0	481	0.044
Q8K0E8	kidney,	mRNA	0	0	1	0	0	481	0.015
P54823	liver,kidney,	mRNA	0	0	1	1	0	483	0.11
O70451	kidney,	mRNA	0	0	2	0	0	484	0.05
XP_006524198.1	kidney,	mRNA	0	0	1	0	0	485	0.082
P49710	spleen,	mRNA	0	0	0	0	118	486	0.543
P11679	liver,kidney,	mRNA	0	0	38	384	0	490	0.251
P33267	liver,	mRNA	0	0	0	4	0	491	0.071
Q99KQ4	kidney,heart,	mRNA	0	2	4	0	0	491	0.024
Q8K1I7	spleen,kidney,	mRNA	0	0	3	0	49	493	0.292
Q11136	liver,	mRNA	0	0	0	1	0	493	0.043
Q8VHI7	kidney,	mRNA	0	0	1	0	0	493	0.039
Q8K124	spleen,	mRNA	0	0	0	0	1	495	0.042
XP_011239970.1	liver,	mRNA	0	0	0	1	0	496	0.161
O70310	spleen,kidney,	mRNA	0	0	2	0	1	496	0.034
Q8BH43	liver,spleen,kidney,	mRNA	0	0	1	1	6	497	0.036
Q9D611	liver,	mRNA	0	0	0	1	0	498	0.155
P24549	liver,	mRNA	0	0	0	18	0	501	0.329
P46660	brain,	mRNA	8	0	0	0	0	501	0.094
Q8BKZ9	heart,	mRNA	0	2	0	0	0	501	0.044
Q8VCF0	liver,kidney,	mRNA	0	0	25	13	0	503	0.276
Q9ERZ0	spleen,	mRNA	0	0	0	0	7	503	0.121
P11714	liver,	mRNA	0	0	0	1	0	504	0.014
P27773	liver,brain,spleen,kidney,	mRNA	2	0	8	35	29	505	0.107
P54869	liver,	mRNA	0	0	0	23	0	508	0.146
Q3THK3	spleen,kidney,	mRNA	0	0	2	0	9	508	0.13
Q91ZJ5	liver,heart,	mRNA	0	1	0	2	0	508	0.071
P09103	liver,spleen,	mRNA	0	0	0	19	8	509	0.167
Q3V0U9	kidney,heart,	mRNA	0	1	1	0	0	509	0.165
O08749	liver,kidney,heart,	mRNA	0	48	75	56	0	509	0.143
Q6DVA0	spleen,	mRNA	0	0	0	0	1	511	0.061
P00397	brain,kidney,heart,	mRNA	2	9	2	0	0	514	0.031
Q8CGN5	kidney,	mRNA	0	0	1	0	0	517	0.025
Q99K28	liver,	mRNA	0	0	0	1	0	520	0.185
P70315	spleen,	mRNA	0	0	0	0	10	520	0.183
O35344	liver,spleen,kidney,heart,	mRNA	0	2	2	11	2	521	0.048
Q8R1Q8	liver,spleen,kidney,	mRNA	0	0	13	1	1	523	0.021
Q8CIN4	liver,spleen,kidney,	mRNA	0	0	5	2	10	524	0.05
P24270	liver,kidney,	mRNA	0	0	110	69	0	527	0.323
P57016	kidney,	mRNA	0	0	7	0	0	528	0.265
Q99JF8	liver,kidney,	mRNA	0	0	2	1	0	528	0.089
P56480	heart,	mRNA	0	6	0	0	0	529	0.42
Q3UEP4	liver,	mRNA	0	0	0	6	0	530	0.021
Q8VCN3	kidney,	mRNA	0	0	1	0	0	530	0.021
P0CG14	spleen,kidney,	mRNA	0	0	2	0	4	533	0.062
Q9WVK4	spleen,kidney,	mRNA	0	0	3	0	4	534	0.124
Q9QXY6	liver,	mRNA	0	0	0	6	0	535	0.131
Q63886	liver,	mRNA	0	0	0	2	0	535	0.032
P20060	liver,brain,spleen,kidney,	mRNA	4	0	18	5	3	536	0.037
Q9EQP2	heart,	mRNA	0	1	0	0	0	541	0.057
Q60864	liver,brain,spleen,kidney,	mRNA	12	0	1	3	10	543	0.083
Q8BH64	spleen,kidney,heart,	mRNA	0	2	4	0	1	543	0.072
P08551	brain,	mRNA	8	0	0	0	0	543	0.046
Q8VC69	kidney,	mRNA	0	0	6	0	0	545	0.039
Q8R086	liver,kidney,	mRNA	0	0	1	3	0	546	0.031
Q8BLS7	spleen,	mRNA	0	0	0	0	1	548	0.058
Q9WV34	brain,	mRNA	1	0	0	0	0	552	0.034
P34914	liver,	mRNA	0	0	0	4	0	554	0.103
P23953	spleen,	mRNA	0	0	0	0	1	554	0.036
Q9Z1M8	spleen,	mRNA	0	0	0	0	9	557	0.122
P26443	liver,	mRNA	0	0	0	5	0	558	0.036
P59326	liver,brain,spleen,kidney,heart,	mRNA	1	1	2	4	2	559	0.036
P11214	brain,	mRNA	1	0	0	0	0	559	0.018
O89023	liver,brain,spleen,kidney,heart,	mRNA	2	10	20	48	1	562	0.208
Q9D0F9	liver,	mRNA	0	0	0	2	0	562	0.123
Q8BI72	kidney,	mRNA	0	0	2	0	0	563	0.055
A2A6U3	liver,	mRNA	0	0	0	13	0	565	0.136
Q8VCT4	liver,	mRNA	0	0	0	1	0	565	0.08
E9Q1P8	kidney,	mRNA	0	0	6	0	0	570	0.093
O08553	brain,spleen,	mRNA	222	0	0	0	6	572	0.465
P63038	kidney,	mRNA	0	0	11	0	0	573	0.366
IP_1121048	kidney,heart,	ncRNA	0	3	49	0	0	573	0.14
Q80UG5-3	liver,brain,spleen,kidney,	mRNA	1	0	9	4	10	576	0.151
P26041	liver,spleen,kidney,heart,	mRNA	0	2	47	7	39	577	0.059
Q9JLV1	heart,	mRNA	0	1	0	0	0	577	0.019
P20917-2	brain,	mRNA	15	0	0	0	0	582	0.057
O88520	kidney,	mRNA	0	0	2	0	0	582	0.034
Q80UG5	liver,spleen,	mRNA	0	0	0	10	2	583	0.163
P26043	kidney,	mRNA	0	0	37	0	0	583	0.111
Q6A028	spleen,	mRNA	0	0	0	0	4	585	0.072
Q64332	brain,	mRNA	37	0	0	0	0	586	0.292
P26040	spleen,kidney,	mRNA	0	0	145	0	19	586	0.166
P14733	spleen,	mRNA	0	0	0	0	2	588	0.051
P35564	spleen,kidney,	mRNA	0	0	3	0	2	591	0.066
Q8BTW9	liver,kidney,	mRNA	0	0	8	2	0	593	0.035
Q91V89	liver,brain,kidney,	mRNA	2	0	7	6	0	594	0.106
XP_006524092.2	kidney,	mRNA	0	0	1	0	0	595	0.081
Q99MN1	liver,kidney,	mRNA	0	0	1	2	0	595	0.044
XP_006526042.1	spleen,	mRNA	0	0	0	0	2	598	0.1
Q8K301	kidney,	mRNA	0	0	4	0	0	598	0.018
P36916	liver,brain,kidney,	mRNA	1	0	4	3	0	607	0.033
P07724	liver,brain,spleen,kidney,heart,	mRNA	108	341	279	337	71	608	0.582
Q91YQ5	liver,kidney,	mRNA	0	0	3	5	0	608	0.048
Q3TIU4	liver,	mRNA	0	0	0	1	0	608	0.03
Q8BGD9	liver,brain,spleen,kidney,heart,	mRNA	89	21	130	90	66	611	0.244
Q9CZW5	liver,	mRNA	0	0	0	1	0	611	0.033
Q8BYF6	kidney,	mRNA	0	0	2	0	0	611	0.02
Q0VGU4	brain,	mRNA	109	0	0	0	0	617	0.694
P50516	brain,kidney,	mRNA	1	0	2	0	0	617	0.201
P40142	liver,spleen,kidney,	mRNA	0	0	9	28	16	623	0.116
Q3U9G9	spleen,kidney,	mRNA	0	0	1	0	4	626	0.102
Q61233	spleen,	mRNA	0	0	0	0	4	627	0.062
P31650	brain,	mRNA	1	0	0	0	0	627	0.021
P48025	spleen,	mRNA	0	0	0	0	5	629	0.1
P59280	brain,	mRNA	1	0	0	0	0	629	0.022
Q8K2Q9	kidney,	mRNA	0	0	5	0	0	631	0.065
Q8BNW9	spleen,kidney,	mRNA	0	0	1	0	2	633	0.016
Q61510	liver,kidney,	mRNA	0	0	21	6	0	634	0.069
Q61550	spleen,	mRNA	0	0	0	0	1	635	0.02
P21661	brain,	mRNA	7	0	0	0	0	637	0.06
Q9QZM0	brain,spleen,kidney,	mRNA	18	0	7	0	3	638	0.266
Q91Z40	liver,spleen,	mRNA	0	0	0	9	1	638	0.052
Q923D5	spleen,kidney,	mRNA	0	0	2	0	1	641	0.056
Q9CS74	liver,	mRNA	0	0	0	1	0	641	0.025
Q8BMF4	heart,	mRNA	0	2	0	0	0	642	0.053
P23780	kidney,	mRNA	0	0	1	0	0	647	0.056
P70663	brain,	mRNA	4	0	0	0	0	650	0.034
Q99PH1	heart,	mRNA	0	1	0	0	0	652	0.104
Q80UP8	liver,	mRNA	0	0	0	1	0	656	0.03
O54732	heart,	mRNA	0	1	0	0	0	657	0.126
Q3V300	spleen,	mRNA	0	0	0	0	1	660	0.064
Q8K1B8	spleen,	mRNA	0	0	0	0	2	665	0.035
O88935-1	brain,	mRNA	13	0	0	0	0	670	0.364
A2AB59-2	spleen,	mRNA	0	0	0	0	3	670	0.018
Q9D2R0	kidney,	mRNA	0	0	1	0	0	672	0.046
XP_006518571.1	brain,	mRNA	8	0	0	0	0	673	0.394
P16014	brain,	mRNA	254	0	0	0	0	677	0.597
P38647	liver,	mRNA	0	0	0	2	0	679	0.072
Q14DH7	liver,kidney,	mRNA	0	0	9	6	0	682	0.051
Q99NB1	kidney,heart,	mRNA	0	6	3	0	0	682	0.032
E9PWE8	liver,spleen,heart,	mRNA	0	2	0	2	10	683	0.045
Q91WV7	kidney,	mRNA	0	0	9	0	0	685	0.069
P63154	liver,	mRNA	0	0	0	1	0	690	0.035
Q61033	spleen,	mRNA	0	0	0	0	1	693	0.227
Q8VIJ6	spleen,	mRNA	0	0	0	0	2	699	0.235
Q8C3X8	kidney,	mRNA	0	0	4	0	0	702	0.019
Q61847	kidney,	mRNA	0	0	18	0	0	704	0.102
Q8VCB3	liver,	mRNA	0	0	0	61	0	704	0.031
Q9CQN1	heart,	mRNA	0	2	0	0	0	706	0.03
Q60707	kidney,	mRNA	0	0	1	0	0	711	0.021
P49290	spleen,	mRNA	0	0	0	0	5	716	0.029
Q9DBM2	kidney,	mRNA	0	0	3	0	0	718	0.065
P11247	liver,spleen,	mRNA	0	0	0	2	5	718	0.028
P11499	liver,	mRNA	0	0	0	8	0	724	0.083
Q9QYE6	kidney,	mRNA	0	0	6	0	0	729	0.077
Q9CZD3	liver,	mRNA	0	0	0	1	0	729	0.016
P10637	brain,	mRNA	287	0	0	0	0	733	0.506
P51660	kidney,	mRNA	0	0	1	0	0	735	0.015
Q91VR5	liver,spleen,kidney,	mRNA	0	0	7	9	2	740	0.072
Q3SYK4	kidney,	mRNA	0	0	1	0	0	740	0.014
Q9JIS5	brain,	mRNA	29	0	0	0	0	742	0.047
Q00PI9	spleen,	mRNA	0	0	0	0	3	745	0.078
Q9CW46	spleen,	mRNA	0	0	0	0	26	748	0.215
XP_017175037.1	kidney,	mRNA	0	0	1	0	0	748	0.035
Q3U0V1	brain,kidney,	mRNA	1	0	5	0	0	748	0.032
Q8R1F1	kidney,	mRNA	0	0	1	0	0	749	0.024
Q61391	kidney,	mRNA	0	0	9	0	0	750	0.101
P63239	brain,	mRNA	6	0	0	0	0	753	0.052
Q9ERG0	kidney,	mRNA	0	0	4	0	0	753	0.029
B2RPU8	liver,	mRNA	0	0	0	1	0	756	0.093
Q8BMS1	heart,	mRNA	0	8	0	0	0	763	0.08
Q8CB77	liver,spleen,kidney,	mRNA	0	0	12	1	5	773	0.025
Q99KI0	brain,kidney,heart,	mRNA	3	19	1	0	0	780	0.119
Q6NZF1	liver,spleen,	mRNA	0	0	0	3	6	792	0.035
D3Z4C0	liver,	mRNA	0	0	0	1	0	795	0.021
Q8VEK3	liver,spleen,kidney,	mRNA	0	0	4	2	34	800	0.154
Q8JZQ2	brain,heart,	mRNA	3	16	0	0	0	802	0.049
P54310-2	liver,	mRNA	0	0	0	1	0	802	0.03
Q80VM5	brain,	mRNA	3	0	0	0	0	803	0.027
Q01853	brain,	mRNA	3	0	0	0	0	806	0.336
Q9Z315	spleen,	mRNA	0	0	0	0	8	806	0.099
Q8VI84	spleen,	mRNA	0	0	0	0	1	807	0.017
Q68FM6	brain,	mRNA	2	0	0	0	0	823	0.034
Q9JJY4	kidney,	mRNA	0	0	3	0	0	825	0.027
Q62468	kidney,	mRNA	0	0	23	0	0	827	0.073
Q8CI94	heart,	mRNA	0	4	0	0	0	843	0.042
Q3V1V3	spleen,	mRNA	0	0	0	0	6	845	0.032
Q9JIK5	kidney,	mRNA	0	0	3	0	0	851	0.027
Q7TSI3	kidney,	mRNA	0	0	1	0	0	856	0.019
P58252	brain,spleen,kidney,heart,	mRNA	2	3	3	0	53	858	0.026
Q61140	kidney,	mRNA	0	0	1	0	0	874	0.037
Q61361	brain,	mRNA	209	0	0	0	0	883	0.319
P28271	liver,kidney,	mRNA	0	0	3	3	0	889	0.015
P26231	liver,spleen,kidney,	mRNA	0	0	5	8	1	906	0.054
Q810A7	liver,kidney,	mRNA	0	0	1	3	0	929	0.014
P04919	spleen,heart,	mRNA	0	1	0	0	2	929	0.011
P70699	brain,	mRNA	7	0	0	0	0	953	0.148
Q3U0S6	liver,kidney,	mRNA	0	0	1	1	0	961	0.023
Q9Z1T2	liver,	mRNA	0	0	0	1	0	963	0.012
G3UW63	spleen,	mRNA	0	0	0	0	1	976	0.008
Q14CH7	kidney,	mRNA	0	0	1	0	0	980	0.049
O55143-2	heart,	mRNA	0	4	0	0	0	998	0.106
Q921K2	kidney,	mRNA	0	0	2	0	0	1014	0.043
Q8C129	spleen,	mRNA	0	0	0	0	1	1025	0.02
Q9Z1W8	brain,	mRNA	1	0	0	0	0	1035	0.014
E9QAP7	heart,	mRNA	0	2	0	0	0	1042	0.057
XP_006499280.1	liver,kidney,	mRNA	0	0	1	1	0	1045	0.04
Q6P9P6	spleen,	mRNA	0	0	0	0	1	1052	0.014
Q8R4U7	kidney,	mRNA	0	0	3	0	0	1068	0.029
P19246	brain,	mRNA	3	0	0	0	0	1090	0.042
Q3U7R1	spleen,	mRNA	0	0	0	0	3	1092	0.022
Q9WTU0	kidney,	mRNA	0	0	10	0	0	1096	0.016
Q6A0A9	liver,	mRNA	0	0	0	1	0	1112	0.012
Q8K298	liver,	mRNA	0	0	0	1	0	1121	0.032
O55111	liver,	mRNA	0	0	0	1	0	1122	0.009
Q148W8	brain,	mRNA	1	0	0	0	0	1138	0.009
B9EJ80	liver,	mRNA	0	0	0	1	0	1147	0.017
Q01279	liver,	mRNA	0	0	0	11	0	1210	0.036
Q9CW03	liver,	mRNA	0	0	0	1	0	1217	0.007
Q6ZQ73	heart,	mRNA	0	1	0	0	0	1235	0.029
Q920F6	kidney,	mRNA	0	0	1	0	0	1248	0.01
P21447	brain,	mRNA	1	0	0	0	0	1276	0.019
P23116	spleen,	mRNA	0	0	0	0	2	1344	0.023
Q01149	kidney,	mRNA	0	0	4	0	0	1372	0.037
Q61830	liver,	mRNA	0	0	0	10	0	1456	0.032
E9Q3G8	liver,brain,spleen,kidney,	mRNA	1	0	14	3	1	1462	0.017
Q61838	liver,heart,	mRNA	0	1	0	9	0	1495	0.024
Q8C196	liver,	mRNA	0	0	0	232	0	1500	0.182
Q6ZPV2-2	kidney,	mRNA	0	0	1	0	0	1552	0.036
Q64511	kidney,heart,	mRNA	0	1	2	0	0	1612	0.017
A0A1B0GS20	heart,	mRNA	0	1	0	0	0	1629	0.022
P01027	heart,	mRNA	0	13	0	0	0	1663	0.028
Q9QZS0	kidney,	mRNA	0	0	1	0	0	1669	0.008
Q02566	heart,	mRNA	0	205	0	0	0	1938	0.127
XP_006518741.1	heart,	mRNA	0	64	0	0	0	1939	0.127
P13541	brain,heart,	mRNA	1	1	0	0	0	1940	0.035
Q8VDD5	liver,spleen,	mRNA	0	0	0	1	23	1960	0.024
P70670	spleen,heart,	mRNA	0	5	0	0	1	2187	0.033
XP_006521153.1	liver,	mRNA	0	0	0	1	0	2415	0.01
Q07113	kidney,	mRNA	0	0	3	0	0	2483	0.006
Q8R4U0	liver,	mRNA	0	0	0	1	0	2559	0.013
II_860560	kidney,	mRNA	0	0	1	0	0	2609	0.006
A2ARV4	kidney,	mRNA	0	0	61	0	0	4660	0.028
XP_017168559.1	brain,	mRNA	1	0	0	0	0	6582	0.002

## Sheet: peptides
Peptide sequence	Peptide length	Accession
ARAGAKMQRDIEREAHRQA	19	A0A087WQ89
ALASPAVPEPSARRRPQPLDEL	22	A0A087WQ89
LPPLVAPSLLEQEVRRV	17	A0A087WQ89
METPIQREIRRS	12	A0A087WQ89
AAQAYAVPNVEKALKNYFRSLRKGPD	26	A0A087WQH8
YAVPNVEKALKNYFRSLRKGPD	22	A0A087WQH8
AYAVPNVEKALKNYFRSLRKGPD	23	A0A087WQH8
TLQRHLGWPQAGN	13	A0A0A0MQC3
ATESSPLTTHVLDTASGLPAQGLCLRL	27	A0A0A0MQC3
TITKETQKFHVPLLLSPWSYTTYRGS	26	A0A0A0MQC3
PGGLLLGDEAPNFEANTTIGRIRFHDFLGDSTS	33	A0A0A6YXQ7
PGGLLLGDEAPNFEANTTIGRIRFHDFLGDST	32	A0A0A6YXQ7
DWITGNKRPNSGSLIQVVTTDGKTE	25	A0A0G2JGJ1
HDWITGNKRPNSGSLIQVVTTDGKTELTPAYF	32	A0A0G2JGJ1
DWITGNKRPNSGSLIQVVTTDGKTELTPAYF	31	A0A0G2JGJ1
WITGNKRPNSGS	12	A0A0G2JGJ1
WITGNKRPNS	10	A0A0G2JGJ1
DWITGNKRPNSGSLIQ	16	A0A0G2JGJ1
MPPGAAAIAVLPTFHDWITGNKRPNSGSLIQVVTTDGKTE	40	A0A0G2JGJ1
ITGNKRPNSGS	11	A0A0G2JGJ1
VFRRLLAALLHNPQL	15	A0A0J9YTR2
DRPGQQKGPGAKA	13	A0A0J9YTR2
KDTFTEELR	9	A0A0J9YTR2
VFRRLLAALLHNPQ	14	A0A0J9YTR2
SQAQQSGAQQTKKDKDKKK	19	A0A0J9YTY0
FQKKKAAAQLLQSQAQQSGAQQTKKDKDKKK	31	A0A0J9YTY0
QSQAQQSGAQQTKKDKDKKK	20	A0A0J9YTY0
MEPPKLNPVVEPLSWML	17	A0A0J9YU08
MEPPKLNPVVEPLSWMLGTW	20	A0A0J9YU08
TLPSAPPPASAGLKSHPPPPEK	22	A0A0N4SUI7
TREPKPPKKR	10	A0A0N4SUI7
GLKSHPPPPEK	11	A0A0N4SUI7
SAKKLTDIGIRRIFS	15	A0A0R4J083
AVPYSMPPIVRFDHPFLFIIFEEHTQSPLFVGKVVDPTHK	40	A0A0R4J0X5
VPYSMPPIVRFDHPFLFIIFEEHTQSPLFVGKVVDPTHK	39	A0A0R4J0X5
LAVPYSMPPIVRFDHPFLFIIFEEHTQSPLFVGKVVDPTHK	41	A0A0R4J0X5
DETGTEAAAATVLLAVPYSMPPIVRFDHPFLFIIFEEHTQSPLFVGKVVDPTHK	54	A0A0R4J0X5
VPYSMPPIVRFDHPFLFIIFEEHTQSPLFVGKVVDPTH	38	A0A0R4J0X5
AVPYSMPPIVRFDHPFLFIIFEEHTQSPLFVGKVVDPTH	39	A0A0R4J0X5
IIFEEHTQSPLFVGKVVDPTHK	22	A0A0R4J0X5
PYSMPPIVRFDHPFLFIIFEEHTQSPLFVGKVVDPTHK	38	A0A0R4J0X5
EEHTQSPLFVGKVVDPTHK	19	A0A0R4J0X5
PAAAPAAAPAAAPTAASPAAAPTVASAAAASAVASA	36	A0A1B0GS20
FDITADDEPLGRVSFEVGCLQTKFQRQQKTFEL	33	A0A1L1SRX5
LLFADKVPKTAENFRAL	17	A0A1L1SST0
LLFADKVPKTAENFR	15	A0A1L1SST0
RSFEVEEIEPPNSTPPRR	18	A2A6U3
RATVASSSQKFQDLGVK	17	A2A6U3
SFEVEEIEPPNSTPPRR	17	A2A6U3
RSFEVEEIEPPNSTPPR	17	A2A6U3
RATVASSSQKFQDLGVKN	18	A2A6U3
EVEEIEPPNSTPPRRVQTP	19	A2A6U3
ATVASSSQKFQDLGVKN	17	A2A6U3
MERDRITALK	10	A2A6U3
VEEIEPPNSTPPRR	14	A2A6U3
SQRSPKPSLR	10	A2A6U3
SQKFQDLGVK	10	A2A6U3
VEEIEPPNSTPPRRVQTP	18	A2A6U3
TTIMTTTATVLPSTVVPSTVLPCTVVPSTVLTSTVLTS	38	A2A7W0
STTIMTTTATVLPSTVVPSTVLPCTVVPSTVLTSTVLTS	39	A2A7W0
MVDMISKLVRR	11	A2AB59-2
MVDMISKLVRRQ	12	A2AB59-2
TEVKNTLPSNETIQQEKEHNERT	23	A2AF33
MEHNGSASNAGKIHQN	16	A2AMM0
TRQTLDKKVSGIRTR	15	A2AMM0
KVSAHIKDVKARVEK	15	A2AMM0
SGERLRQSGER	11	A2AMM0
AKDPKAEGQEVDR	13	A2AMM0
SGKEHIDHIKK	11	A2AMM0
SGKEHIDHIK	10	A2AMM0
SGSLALGPIHE	11	A2AMM0
SISSAAPSKEAFKIRSLR	18	A2AMM0
FKKSISSAAPSKEAFKIR	18	A2AMM0
TLDKKVSGIRT	11	A2AMM0
TRIVTPERRERLR	13	A2AMM0
TRQTLDKKVSGIR	13	A2AMM0
SPHPEGCPGSGRLGLR	16	A2ARS0
RSSTPGYTATEDTFKDTANLVKEDSDV	27	A2ARV4
GYTATEDTFKDTANLVKEDSDV	22	A2ARV4
KRSSTPGYTATEDTFKDTANLVKEDSDV	28	A2ARV4
TPGYTATEDTFKDTANLVKEDSDV	24	A2ARV4
FGPETIIDRSMAMNEQFVMEVGKQPVIFE	29	A2ARV4
KRSSTPGYTATEDTFKDTAN	20	A2ARV4
SSTPGYTATEDTFKDTANLVKEDSDV	26	A2ARV4
STPGYTATEDTFKDTANLVKEDSDV	25	A2ARV4
IFKRKPKQTTN	11	A2ARV4
GTKWNIFKRKPKQTTN	16	A2ARV4
ASKRSSTPGYTATEDTFKDTAN	22	A2ARV4
GADETQGTKWNIFK	14	A2ARV4
ASPGADETQGTKWNIFK	17	A2ARV4
KRKPKQTTNFE	11	A2ARV4
IFKRKPKQTTNF	12	A2ARV4
FKRKPKQTTN	10	A2ARV4
ASPGADETQGTKWNIFKRKPKQTTN	25	A2ARV4
IFKRKPKQTTNFE	13	A2ARV4
YTATEDTFKDTAN	13	A2ARV4
TEDTFKDTANLVKEDSDV	18	A2ARV4
SSTPGYTATEDTFKDTAN	18	A2ARV4
VAPPPSPSLPAKASKRS	17	A2ARV4
FVMEVGKQPVIFE	13	A2ARV4
APPPSPSLPAKASKRS	16	A2ARV4
GTKWNIFKRKPKQ	13	A2ARV4
YGRSIDPSEIVPEPKPASPGADETQGTKWN	30	A2ARV4
IFKRKPKQT	9	A2ARV4
PGYTATEDTFKDTANLVKEDSDV	23	A2ARV4
DTEQKEAVAVAPPPSPSLPAK	21	A2ARV4
TPGYTATEDTFKDTAN	16	A2ARV4
ADETQGTKWNIFK	13	A2ARV4
IGVSPFGPETIIDRSM	16	A2ARV4
VGKQPVIFE	9	A2ARV4
ASPGADETQGTKWNIFKRKPKQTTNFE	27	A2ARV4
DIGVSPFGPETIIDRS	16	A2ARV4
ASPGADETQGTKWNIFKRKPKQ	22	A2ARV4
NIFKRKPKQTTN	12	A2ARV4
GAASGEAEGDAKGDKTKVKDEPQRRSARLSAKPAPPKPEPKPKKAPAKKGEKVPKGKKGKADAGKDANNPAENGDAKTDQAQKAEGAGDAK	91	A3KGL9
MATAPGAASGEAEGDAKGDKTKV	23	A3KGL9
ATAPGAASGEAEGDAKGDKTKV	22	A3KGL9
PRGSRIRTSRVTLLAGRAPQMRAAPRRAPAAQPPAAAAPSAVGSPAAAPRQPGLMAQ	57	B2RPU8
MSLLSAIDTSAASVYQPAQLLNWVY	25	B2RVL6
KSVNKTTGLTRHIINTSSR	19	B9EJ80
AAGVRDVFERPSAKKRKTT	19	C0HKD8
AGVRDVFERPSAKKRKTT	18	C0HKD8
AAGVRDVFERPSAKKRK	17	C0HKD8
QNTKFFKQKAAGVRDVFERPSAKKRKTT	28	C0HKD8
KQKAAGVRDVFERPSAKKRKTT	22	C0HKD8
TKFFKQKAAGVRDVFERPSAKKRKTT	26	C0HKD8
TKFFKQKAAGVRDVFERPSAKKRK	24	C0HKD8
TKFFKQKAAGVRDVFERPSAKK	22	C0HKD8
VDVKAIKHQIKEAVKKL	17	D3YTY6
RKKYNLGAPVAGTCYQAEWDDYVPKLYEQLSGK	33	D3Z1V4
KSGDNRGKFKVETFRKKYNLGAPVAGTCYQAEWDDYVPKLYEQLSGK	47	D3Z1V4
YNLGAPVAGTCYQAEWDDYVPKLYEQLSGK	30	D3Z1V4
LGAPVAGTCYQAEWDDYVPKLYEQLSGK	28	D3Z1V4
PVAGTCYQAEWDDYVPKLYEQLSGK	25	D3Z1V4
GAPVAGTCYQAEWDDYVPKLYEQLSGK	27	D3Z1V4
SGDNRGKFKVETFRKKYNLGAPVAGTCYQAEWDDYVPKLYEQL	43	D3Z1V4
KSGDNRGKFKVETFRKKYNLGAPVAGT	27	D3Z1V4
APVAGTCYQAEWDDYVPKLYEQLSGK	26	D3Z1V4
KSGDNRGKFKVETFRKKYNLGAPVAGTCY	29	D3Z1V4
SGDNRGKFKVETFRKKYNLGAPVAGTCY	28	D3Z1V4
KSGDNRGKFKVETFRKKYNLGAPVAGTCYQA	31	D3Z1V4
RKKYNLGAPVAGTCYQAEWDDYVPKLYEQL	30	D3Z1V4
EQEQPLSCDEPILSNKSGDNRGKFKVETFRKKYNLGAPVAGTCYQAEWDDYVPKLYEQLSGK	62	D3Z1V4
RKKYNLGAPVAGTCY	15	D3Z1V4
KSGDNRGKFKVETFRKKYNLGAPVAG	26	D3Z1V4
KSGDNRGKFKVETFRKKYNLGAPVAGTCYQAEWDDYVPKLYEQL	44	D3Z1V4
NLGAPVAGTCYQAEWDDYVPKLYEQL	26	D3Z1V4
NLGAPVAGTCYQAEWDDYVPKLYEQLSGK	29	D3Z1V4
HRYVWLVYEQEQPLSCDEPILSNKSGDNRGKFKVETFRKKYNLGAPVAGTCYQA	54	D3Z1V4
KKYNLGAPVAGTC	13	D3Z1V4
EQEQPLSCDEPILSNKSGDNRGKFKVETFRKKYNLGAPVAGTCYQA	46	D3Z1V4
KKYNLGAPVAGTCYQAEWDDYVPKLYEQLSGK	32	D3Z1V4
EQEQPLSCDEPILSNKSGDNRGKFKVETFRKKYNLGAPVAGTCY	44	D3Z1V4
PILSNKSGDNRGKFKVETFRKKYNLGAPVAGTCY	34	D3Z1V4
DEPILSNKSGDNRGKFKVETFRKKYNLGAPVAGTCYQA	38	D3Z1V4
KGNDISSGTVLSDYVGSGPPSGTDALGLGIALESAEMAVLYSDSPGLHRYVWLVYEQEQPLSCDEPILSNKSGDNRGKFKV	81	D3Z1V4
FRKKYNLGAPVAGTCYQAEWDDYVPKLYEQLSGK	34	D3Z1V4
KKYNLGAPVAGTCYQAEWDDYVPKLYEQL	29	D3Z1V4
KYNLGAPVAGTCYQAEWDDYVPKLYEQLSGK	31	D3Z1V4
RKKYNLGAPVAGTC	14	D3Z1V4
RKKYNLGAPVAGTCYQA	17	D3Z1V4
RKKYNLGAPVAGT	13	D3Z1V4
EQEQPLSCDEPILSNKSGDNRGKFKVETFRKKYNLGAPVAGT	42	D3Z1V4
YNLGAPVAGTCYQAEWDDYVPKLYEQL	27	D3Z1V4
AVDISKGRTSRGLKAVR	17	D3Z4C0
IALRPYPKEEVSQYLKKFRLFK	22	D3Z4S3
RHFWGPVANW	10	D3Z5S0
SLYRTEELGHPRSQDYRLFF	20	D3Z636
GHPRSQDYRLFF	12	D3Z636
NVEEVWHFLRN	11	D3Z636
AVPVRDDGNMPDVPSHPQDPLGPSLDWLKNL	31	D3Z670
LGKKEPLEAAAGEALGK	17	D3Z6W3
DPGKLYTLVLTDPDAPSRKDPKFREWHHFL	30	D6RHS6
MNRPSSISWDGLDPGKLYTLVLTDPDAPSRKDPKFREWHHFLVV	44	D6RHS6
PSSISWDGLDPGKLYTLVLTDPDAPSRKDPKFREWHHFLVVNM	43	D6RHS6
VLTDPDAPSRKDPKFREWHHFLVVNM	26	D6RHS6
VLTDPDAPSRKDPKFREWHHF	21	D6RHS6
VLTDPDAPSRKDPKFREWHH	20	D6RHS6
VLTDPDAPSRKDPKFREWHHFLVV	24	D6RHS6
RPSSISWDGLDPGKLYTLVLTDPDAPSRKDPKFREWHHF	39	D6RHS6
VLTDPDAPSRKDPKFREWHHFL	22	D6RHS6
PKFREWHHFLVVNM	14	D6RHS6
RKDPKFREWHHFLVVNM	17	D6RHS6
NRPSSISWDGLDPGKLYTLVLTDPDAPSRKDPKFREWHHFL	41	D6RHS6
MNRPSSISWDGLDPGKLYTLVLTDPDAPSRKDPKFREWHHFL	42	D6RHS6
DPGKLYTLVLTDPDAPSRKDPKFREWHHFLVVNMKGNDISSGTVLS	46	D6RHS6
NRPSSISWDGLDPGKLYTLVLTDPDAPSRKDPKFREWHHFLVV	43	D6RHS6
PDAPSRKDPKFREWHHFLVV	20	D6RHS6
AGVTVDELGKVLTPTQVMNRPSSISWDGLDPGKLYTLVLTDPDAPSRKDPKFREWHHFLVVNM	63	D6RHS6
MNRPSSISWDGLDPGKLYTLVLTDPDAPSRKDPKFREWHHFLVVNM	46	D6RHS6
PDAPSRKDPKFREWHHFL	18	D6RHS6
LTDPDAPSRKDPKFREWHH	19	D6RHS6
PKFREWHHFLVV	12	D6RHS6
RKDPKFREWHH	11	D6RHS6
LTDPDAPSRKDPKFREWHHF	20	D6RHS6
DPGKLYTLVLTDPDAPSRKDPKFREWHHFLVVN	33	D6RHS6
TDPDAPSRKDPKFREWHH	18	D6RHS6
SDYVGSGPPSGTGRRHW	17	D6RHS6
RPSSISWDGLDPGKLYTLVLTDPDAPSRKDPKFREWHHFL	40	D6RHS6
VLTDPDAPSRKDPKFREWHHFLV	23	D6RHS6
TDPDAPSRKDPKFREWHHFL	20	D6RHS6
RKDPKFREWHHFLVV	15	D6RHS6
DPDAPSRKDPKFREWHHFL	19	D6RHS6
VLTDPDAPSRKDPKFREWHHFLVVN	25	D6RHS6
TDPDAPSRKDPKFREWHHFLVVNM	24	D6RHS6
TDPDAPSRKDPKFREWHHF	19	D6RHS6
GKVLTPTQVMNRPSSISWDGLDPGKLYTLVLTDPDAPSRKDPKFREWHHFLVVNM	55	D6RHS6
PKFREWHH	8	D6RHS6
DPGKLYTLVLTDPDAPSRKDPKFREWHHFLV	31	D6RHS6
GLDPGKLYTLVLTDPDAPSRKDPKFREWHH	30	D6RHS6
PGKLYTLVLTDPDAPSRKDPKFREWHHFLVVNMKGN	36	D6RHS6
PDAPSRKDPKFREWHHFLVVNM	22	D6RHS6
PSSISWDGLDPGKLYTLVLTDPDAPSRKDPKFREWHHFL	39	D6RHS6
DPDAPSRKDPKFREWHHFLVV	21	D6RHS6
KGNDISSGTVLSDYVGSGPPSGTGRRHWGV	30	D6RHS6
VVNMKGNDISSGTVLSDYVGSGPPSGTGRRHWGV	34	D6RHS6
RPSSISWDGLDPGKLYTLVLTDPDAPSRKDPKFREWHH	38	D6RHS6
ASGRRGWDSSHEDDLPVY	18	E9PWE8
ARPGTTDQVPRQK	13	E9PWE8
MASGRRGWDSSHEDDLPVYLARPGTTDQVPRQKYG	35	E9PWE8
ASGRRGWDSSHEDDLPV	17	E9PWE8
QARPGPPGGAGP	12	E9Q0B3
NVPWAFMQGEIATILAGDVKVKKERDS	27	E9Q1P8
NAGGSHASKDATQVHS	16	E9Q1P8
ERLEDTHFVQ	10	E9Q1P8
GKNMFSSSGTSVSGRKIKTAVRRKK	25	E9Q3G8
GKNMFSSSGTSVSGRKIKTAVRRK	24	E9Q3G8
ASEAGGIGGGGGGGKIRTR	19	E9Q3G8
SLTPSGDLRK	10	E9Q3G8
MFSSSGTSVSGRKIKTAVRRK	21	E9Q3G8
GLSSGVGGGGGKMRRERTH	19	E9Q3G8
SSGTSVSGRKIKTAVRRKK	19	E9Q3G8
GLSSGVGGGGGKMR	14	E9Q3G8
MFSSSGTSVSGRKIKTAVRRKK	22	E9Q3G8
FSSSGTSVSGRKIKTAVRRKK	21	E9Q3G8
PSASPQKIRSARQRRPPVDAGH	22	E9Q942
AAPAPAAPPPPA	12	E9QAP7
AAPAPAAASGGAAGLGQPGAGAQGAKAEAPKPGPGPGPGPAAAAAAA	47	E9QAP7
MATLLRKIGLIRL	13	E9QMD2
ATLLRKIGLIR	11	E9QMD2
SREKDLDEVLQTHSV	15	F6TN03
ARKTSNSEETTRVTTIATDEPDSQALISD	29	F6TUL9
GSSPKSKTKGELVTAS	16	F6V4G5
ESEEGCIF	8	G3UW63
SGPPPADLCHAL	12	G3UZ47
XDLKTPAGLQVLNDYL	16	G3UZ47
DPTGAFGKATDLLLDDSL	18	G3UZJ4
ADPTGAFGKATDLLLDDSLVSLFGNRRL	28	G3UZJ4
ADPTGAFGKATDLLLDDSLVSLFGNRRLKRF	31	G3UZJ4
LLADPTGAFGKATDLLLDDSLVSLFGNRRLK	31	G3UZJ4
FGNRRLKRFSMVIDNGIVK	19	G3UZJ4
GNRRLKRFSMVIDNGIVK	18	G3UZJ4
VSLFGNRRLKRFSMVIDNGIVKA	23	G3UZJ4
FGNRRLKRFSMVIDNGIVKA	20	G3UZJ4
ADPTGAFGKATDLLLDDSLVSLFGNRRLKRFSM	33	G3UZJ4
DPTGAFGKATDLLLDDSLVSL	21	G3UZJ4
FGNRRLKRFSMVIDNGIVKAL	21	G3UZJ4
PTGAFGKATDLLLDDSLVSLFGNRRLK	27	G3UZJ4
DPTGAFGKATDLLLDDSLVSLFGNRRLKR	29	G3UZJ4
DPTGAFGKATDLLLDDSLVSLFGNRRLKRFSM	32	G3UZJ4
DPTGAFGKATDLLLDDSLVSLFGNRRLKRFS	31	G3UZJ4
DDSLVSLFGNRRLKRFSMVIDNGIVKA	27	G3UZJ4
LDDSLVSLFGNRRL	14	G3UZJ4
DPTGAFGKATDLLLDDSLVSLFGNRRLK	28	G3UZJ4
PTGAFGKATDLLLDDSLVSLFGNRRLKRF	29	G3UZJ4
PTGAFGKATDLLLDDSLVSLFGNRRLKRFSM	31	G3UZJ4
NRRLKRFSMVIDNGIVKA	18	G3UZJ4
LLDDSLVSLFGNRRLKRFSM	20	G3UZJ4
GNRRLKRFSMVIDNGIVKA	19	G3UZJ4
SLFGNRRLKRFSMVIDNGIVKA	22	G3UZJ4
LDDSLVSLFGNRRLKRFSM	19	G3UZJ4
LFGNRRLKRFSMVIDNGIVKA	21	G3UZJ4
KATDLLLDDSLVSLFGNRRLKRFS	24	G3UZJ4
PTGAFGKATDLLLDDSLVSLFGNRRL	26	G3UZJ4
TDLLLDDSLVSLFGNRRLKRF	21	G3UZJ4
TDLLLDDSLVSLFGNRRLKRFS	22	G3UZJ4
LLDDSLVSLFGNRRLKRFS	19	G3UZJ4
LLDDSLVSLFGNRRLKRF	18	G3UZJ4
LDDSLVSLFGNRRLKRFSMVIDNGIVK	27	G3UZJ4
TDLLLDDSLVSLFGNRRLKRFSMVIDNGIVKA	32	G3UZJ4
GIVKALNVEPDGTGLTCSLAPNILSQL	27	G3UZJ4
ADPTGAFGKATD	12	G3UZJ4
LLLDDSLVSLFGNRRLK	17	G3UZJ4
FGNRRLKRFSM	11	G3UZJ4
LLDDSLVSLFGNRRLKRFSMVIDNGIVKA	29	G3UZJ4
SLAPNILSQL	10	G3UZJ4
ADPTGAFGKATDLLLDDSLVSLFGNRRLKRFSMVIDNGIVKA	42	G3UZJ4
RFSMVIDNGIVKA	13	G3UZJ4
ADPTGAFGKATDLL	14	G3UZJ4
LDDSLVSLFGNRRLKRFSMVIDNGIVKA	28	G3UZJ4
SLVSLFGNRRLKRF	14	G3UZJ4
VSLFGNRRLKRFSM	14	G3UZJ4
PGAFTPGCSKVRLLADPTGAFGKATDLLLDDSLVSLFGNRRL	42	G3UZJ4
SLVSLFGNRRLKRFSM	16	G3UZJ4
ADPTGAFGKATDLLLDDSLVSLFGNRRLKRFS	32	G3UZJ4
ADPTGAFGKATDLLLDDSLVSLFGNRRLK	29	G3UZJ4
AFTPGCSKVRLLADPTGAFGKATDLLLDDSLVSLFGNRRLKRFS	44	G3UZJ4
DPTGAFGKA	9	G3UZJ4
AISKEVKKATVNLLGDEKKST	21	G3X8R0
LLGDEKKST	9	G3X8R0
PQNQKAIGNALKSWNETFHARLASL	25	G3X9L6
TIDDLNEIFPETKLDKKYPYWPHQPIENL	29	G3X9L6
VEVMPQNQKAIGNALKSWNETFHARLASL	29	G3X9L6
KSWNETFHARLASL	14	G3X9L6
RIQEYEKQLEKMR	13	G3X9L6
SEKPPAIDWAYYRA	14	G3X9L6
KSWNETFHARL	11	G3X9L6
RIQEYEKQLEKMRNIIPFDQM	21	G3X9L6
RLASLSEKPPAIDWAYYRA	19	G3X9L6
PQNQKAIGNALKSWNETFHARLA	23	G3X9L6
RIQEYEKQLEKM	12	G3X9L6
NVAKPGLVDDFEKKY	15	G3X9L6
SLSEKPPAIDWAYYRA	16	G3X9L6
VEVMPQNQKAIGNALKSWNETFHARL	26	G3X9L6
VEVMPQNQKAIGNALKSWNETFHAR	25	G3X9L6
KSWNETFHARLA	12	G3X9L6
VEVMPQNQKAIGNALKSWNETFHARLA	27	G3X9L6
KSWNETFHAR	10	G3X9L6
AGRKLALKTIDWVSF	15	G3X9L6
AGRKLALKTIDW	12	G3X9L6
MAGRKLALKTIDW	13	G3X9L6
IQEYEKQLEKMR	12	G3X9L6
AGRKLALKTIDWV	13	G3X9L6
AGRKLALKTIDWVS	14	G3X9L6
AGRKLALKTIDWVSFV	16	G3X9L6
YRANVAKPGLVDDFEKKYNAL	21	G3X9L6
AGRKLALKTIDWVSFVE	17	G3X9L6
VEVMPQNQKAIGNALKSWNETFHA	24	G3X9L6
MAGRKLALKTIDWVSFV	17	G3X9L6
MAGRKLALKTIDWVSF	16	G3X9L6
MAGRKLALKTIDWVSFVE	18	G3X9L6
MAGRKLALKTIDWV	14	G3X9L6
YYRANVAKPGLVDDFEKKYNAL	22	G3X9L6
KSWNETFHARLAS	13	G3X9L6
RIQEYEKQLEK	11	G3X9L6
QEYEKQLEKMRNIIPFDQM	19	G3X9L6
SWNETFHARL	10	G3X9L6
RNIIPFDQM	9	G3X9L6
EKPPAIDWAYYRA	13	G3X9L6
QKAIGNALKSWNETFHARL	19	G3X9L6
PQNQKAIGNALKSWNETFHARL	22	G3X9L6
SGSQLRIQEYEKQLEKMRNIIPFDQM	26	G3X9L6
VSFVEVMPQNQKAIGNALKSWNETFHARLASL	32	G3X9L6
NALKIPVPEDK	11	G3X9L6
AGRKLALKTI	10	G3X9L6
RLASLSEKPPAIDWAYY	17	G3X9L6
RLASLSEKPPAIDWA	15	G3X9L6
KPPAIDWAYYRA	12	G3X9L6
SWNETFHARLASL	13	G3X9L6
GLVDDFEKKYNALK	14	G3X9L6
PQNQKAIGNALKSWNETF	18	G3X9L6
SWNETFHARLASLSEKPPAIDWAYYRA	27	G3X9L6
VEVMPQNQKAIGNAL	15	G3X9L6
SFVEVMPQNQKAIGNALKSWNETFHARLASL	31	G3X9L6
WNETFHARL	9	G3X9L6
AGRKLALKTIDWVSFVEVMPQNQKAIGNAL	30	G3X9L6
VEVMPQNQKAIGNALKSWNETFHARLASLSEKPPAIDWA	39	G3X9L6
VSFVEVMPQNQKAIGNALKSWNETFHARLA	30	G3X9L6
KSWNETFHA	9	G3X9L6
GLVDDFEKKY	10	G3X9L6
VEVMPQNQKAIGNALKSWNETF	22	G3X9L6
VEVMPQNQKAIGNALK	16	G3X9L6
SWNETFHA	8	G3X9L6
RANVAKPGLVDDFEKKY	17	G3X9L6
NVAKPGLVDDFEKKYNALK	19	G3X9L6
AGRKLALKT	9	G3X9L6
MAGRKLALKTIDWVSFVEVMPQNQKAIGNAL	31	G3X9L6
ASLSEKPPAIDWAYYRA	17	G3X9L6
KTIDWVSFVEVMPQNQKAIGNAL	23	G3X9L6
RANVAKPGLVDDFEKK	16	G3X9L6
KSWNETFHARLASLSEKPPAIDWAYYRA	28	G3X9L6
KPGLVDDFEKKY	12	G3X9L6
MAGRKLALKTIDWVSFVEVMPQNQKAIGNALKSWNETFHARL	42	G3X9L6
QKAIGNALKSWNETFHARLA	20	G3X9L6
DWVSFVEVMPQNQKAIGNALKSWNETFHARLA	32	G3X9L6
MAGRKLALKTIDWVSFVEVMPQNQKAIGN	29	G3X9L6
HARLASLSEKPPAIDWAYYRA	21	G3X9L6
MAGRKLALKTIDWVSFVEV	19	G3X9L6
KTIDWVSFVEVMPQNQKAIGNALKSWNETFHA	32	G3X9L6
ALKTIDWVSFVEVMPQNQKAIGNALKSWNETFHARLA	37	G3X9L6
ALKTIDWVSFVEVMPQNQKAIGNALKSWNETFHA	34	G3X9L6
VAKPGLVDDFEKKY	14	G3X9L6
SWNETFHARLA	11	G3X9L6
VSFVEVMPQNQKAIGNALKSWNETFHAR	28	G3X9L6
ALKTIDWVSFVEVMPQNQKAIGNAL	25	G3X9L6
ASLSEKPPAIDWAYYR	16	G3X9L6
NVAKPGLVDDFEKKYNAL	18	G3X9L6
VEVMPQNQKAIGNALKSWNET	21	G3X9L6
NALKIPVPEDKY	12	G3X9L6
MAGRKLALKTIDWVSFVEVMPQNQKAIGNALKSWNETFHARLA	43	G3X9L6
KTIDWVSFVEVMPQNQKAIGNALKSWNETFHARL	34	G3X9L6
VSFVEVMPQNQKAIGNALKSWNETFHARL	29	G3X9L6
KTIDWVSFVEVMPQNQKAIGNALKSWNETFHARLA	35	G3X9L6
KTIDWVSFVEVMPQNQKAIGNALKSWNETF	30	G3X9L6
LASLSEKPPAIDWAYYRA	18	G3X9L6
EVMPQNQKAIGNALKSWNETFHARLA	26	G3X9L6
ALKTIDWVSFVEVMPQNQKAIGNALKSWNETF	32	G3X9L6
MAGRKLALKTID	12	G3X9L6
MPQNQKAIGNALKSWNETFHARLA	24	G3X9L6
AGRKLALKTIDWVSFVEVMPQNQKAIGNALKSWNETFHA	39	G3X9L6
MAGRKLALKTIDWVSFVEVMPQNQKAIGNALKSWNETFHA	40	G3X9L6
ALKSWNETFHARLA	14	G3X9L6
ASLSEKPPAIDWAYY	15	G3X9L6
NVAKPGLVDDFEKKYN	16	G3X9L6
KIPVPEDKY	9	G3X9L6
DWVSFVEVMPQNQKAIGNALKSWNETFHARL	31	G3X9L6
LASLSEKPPAIDWA	14	G3X9L6
ALKTIDWVSFVEV	13	G3X9L6
IDWVSFVEVMPQNQKAIGNAL	21	G3X9L6
MAGRKLALKTIDWVSFVEVMPQNQKAIGNALKSWNETF	38	G3X9L6
MAGRKLALKTIDWVSFVEVMPQNQKAIGNA	30	G3X9L6
MAGRKLALKTIDWVSFVEVMPQNQK	25	G3X9L6
MAGRKLALKTIDWVSFVEVMPQN	23	G3X9L6
MAGRKLALKTIDWVSFVEVMPQNQ	24	G3X9L6
SLSEKPPAIDWA	12	G3X9L6
MAGRKLALKTIDWVSFVEVM	20	G3X9L6
SEKPPAIDWA	10	G3X9L6
ALKSWNETFHA	11	G3X9L6
VMPQNQKAIGNALKSWNETFHARLA	25	G3X9L6
AGRKLALKTIDWVSFVEVM	19	G3X9L6
SEKPPAIDWAYYR	13	G3X9L6
KTIDWVSFVEVMPQNQKAIGNALKSWNETFHARLASL	37	G3X9L6
EKQLEKMRNIIPFDQM	16	G3X9L6
ALKTIDWVSFVEVMPQNQKAIGNALKSWNETFHARLASL	39	G3X9L6
PQNQKAIGNALKSWNETFHAR	21	G3X9L6
KSWNETFHARLASLSEKPPAIDWA	24	G3X9L6
AGRKLALKTIDWVSFVEVMPQNQKAIGNALKSWNETF	37	G3X9L6
SLSEKPPAIDWAYY	14	G3X9L6
LSEKPPAIDWA	11	G3X9L6
MAGRKLALKTIDWVSFVEVMPQNQKAIG	28	G3X9L6
VEVMPQNQKA	10	G3X9L6
HQVATPPKDGKISQDQSPTN	20	I7HPW4
PGGLLLGDEAPNFEANTTIGRIRFHDFLGDSC	32	II_1028055
KGKAKWDSWNKLKGNTHSDQLP	22	II_1036545
SHFKQATVGDVNTDRPGLLDLKGKAKWDSWNKLKGNTHSDQLP	43	II_1036545
TVGDVNTDRPGLLDLKGKAKWDSWNKLKGNTHSDQLP	37	II_1036545
KQATVGDVNTDRPGLLDLKGKAKWDSWNKLKGNTHSDQLP	40	II_1036545
HFKQATVGDVNTDRPGLLDLKGKAKWDSWNKLKGNTHSDQLP	42	II_1036545
MCRTQPPPKLPVGPSH	16	II_1066842
FRQQLEVFMKKNVDFLIAEVSKG	23	II_1103994
TSTLSLKGVEVFSSVSPQGGGAGKR	25	II_1135118
KGVEVFSSVSPQGGGAGKR	19	II_1135118
TSTLSLKGVEVFSSVSPQGGGAGK	24	II_1135118
SSVSPQGGGAGKR	13	II_1135118
FEVGWAVVLQGGVPGAVEGEALSGAARPSGGASAGGGAI	39	II_1139487
ADKVPKTAGWF	11	II_1139489
DITADDEPLGRVSFELFADKVPKTAGWF	28	II_1139489
ADKVPKTAGWFH	12	II_1139489
ELFADKVPKTAGWF	14	II_1139489
YVGEYDHLPEQAFYMVGPIEEAVAKADKLAEEHGS	35	II_1146319
TVLASHHASTCQQLAVCESR	20	II_2415475
MQIFVKTLTGKTITLEVEPSDTIENVKAKIQDKEGK	36	II_647476
EVPRSKKKEKQGPERK	16	II_860560
SSEEQKQQPPHSSSQQHSETQGPEF	25	II_861176
SSEEQKQQPPHSSSQQH	17	II_861176
SSEEQKQQPPHSSSQ	15	II_861176
SEEQKQQPPHSSSQQHSETQGPEF	24	II_861176
RMLQSVPLS	9	II_861176
SEEQKQQPPHSSSQ	14	II_861176
MQIFVKTLTGKTITLEVEPSDTIENVKAKIQDKEGGLC	38	II_866585
MQIFVKTLTGKTITLEVEPSDTIENVKAKIQDKEGG	36	II_866585
MQIFVKTLTGKTITLEVEPSDTIENVKAKIQDKEGGL	37	II_866585
PVAEDSDFPIQNLPYGVFSTQSNPKPRIGVAIGDQILDLSVIKHLFTGPALSKHQHVFDEVGHCIMD	67	II_885711
SLHKSTQKDHEGTILQMFLPGSL	23	II_888593
LGGQVSAWDDRIAEGTFPGKI	21	II_893833
TGPLGGQVSAWDDRIAEGTFPGKI	24	II_893833
GGQVSAWDDRIAEGTFPGKI	20	II_893833
QVSAWDDRIAEGTFPGKI	18	II_893833
AKVAVLGASGGIGQPLSLLLKNSPLVSRLTLYDIAHTPGVAADLSHIETRANVKGTGRGCLG	62	II_929331
VPPVQVSPLIKVNPH	15	II_935113
VPPVQVSPLIK	11	II_935113
VPPVQVSPLIKVNPHPRC	18	II_935113
DPGKLYTLVLTDPDAPSRKDPKFRPVGEKMGRGYL	35	II_937858
DPGKLYTLVLTDPDAPSRKDPKFRPVGEKMGRGYLS	36	II_937858
DPGKLYTLVLTDPDAPSRKDPKFRPVGEKMGRG	33	II_937858
DGLDPGKLYTLVLTDPDAPSRKDPKFRPVGEKMGRGYLS	39	II_937858
KKPKTPNMPR	10	II_943705
LVAPGPGR	8	II_958403
GCSFTAMPFLDIQKKLGISLDRHF	24	II_960525
KKATQEAFMKRAMT	14	II_963144
ASALAAWGGKAANKKATQEAFMKRAMT	27	II_963144
SALAAWGGKAANKKATQEAFMKRAMT	26	II_963144
WGGKAANKKATQEAFMKRAMT	21	II_963144
GGKAANKKATQEAFMKRAMT	20	II_963144
NSFVNDIFERIAGMKTP	17	II_969993
KVLKQVHPDTGISSKAMGIMNSFVNDIFERIAGMKTP	37	II_969993
QVHPDTGISSKAMGIMNSFVNDIFERIAGMKTP	33	II_969993
MNSFVNDIFERIAGMKTP	18	II_969993
VNDIFERIAGMKTP	14	II_969993
GIMNSFVNDIFERIAGMKTP	20	II_969993
PLWGLLSPPNRRSWESCVLLWLLLSDVLLGRHLLPFYH	38	IP_1000026
KIQTLGTLMIQN	12	IP_1003954
QEAFMRK	7	IP_1006107
IYLGEPQNLLK	11	IP_1007962
LGLSFLKGDKQRMIAV	16	IP_1011573
APAAAPAARRPPAR	14	IP_1012688
GRNRQGKTPSVQQKHRLGFKTPKEAIEGTYI	31	IP_1015774
VKVGVDGF	8	IP_1016765
TNKKEPELLEPIPYEF	16	IP_1017065
ATDWQLILDWVPYINGKFKKDD	22	IP_1017504
PMFIVNTNVPRTSVPEGFLSELTQQLAQATGKPAQY	36	IP_1018469
PMFIVNTNVPRTSVPEGFLSELTQQLAQATGK	32	IP_1018469
PRTSVPEGFLSELTQQL	17	IP_1018469
PMFIVNTNVPRTSVPEGFLSEL	22	IP_1018469
AAPAKGKNLSLVVHGPGDIRLENYPIPELGPN	32	IP_1019048
AAPAKGKNLSLVVHGPGDIRLENYPIPELGPNDVL	35	IP_1019048
PKRKAEGDAKGDKTKVKDEPQRSSARLS	28	IP_1019198
PKRKAEGDAKGDKTKVKDEPQRSSARL	27	IP_1019198
KPVRQK	6	IP_1019290
VRDMRQRVAVGVIKAVDKKAAGAGKVTKSAQKAQK	35	IP_1020044
RDMRQRVAVGVIKAVDKKAAGAGKVTKSAQKAQK	34	IP_1020044
VRDMRQRVAVGVIKAVDKKAAGAGKVTKSAQKAQKA	36	IP_1020044
VRDMRQRVAVGVIKAVDKKAAGAGKVTKSAQKAQKAK	37	IP_1020044
VRDMRQRVAVGVIKAVDKKAAGAGKVTKSAQKA	33	IP_1020044
RRSGKKLEDGPK	12	IP_1020044
VRDMRQRVAVGVIKAVDK	18	IP_1020044
RSGKKLEDGPKFLK	14	IP_1020044
RSGKKLEDGPK	11	IP_1020044
RDMRQRVAVGVIKAVDKKAAGAGKVTK	27	IP_1020044
VRDMRQRVAVGVIKAVDKKAAGAGKVTK	28	IP_1020044
RDMRQRVAVGVIKAVDKKAAGAGKVTKSAQKAQKA	35	IP_1020044
RDMRQRVAVGVIKAVDKKAAGAGKVTKSAQKAQKAK	36	IP_1020044
RDMRQRVAVGVIKAVDKKAAGAGKVT	26	IP_1020044
RDMRQRVAVGVIKAVDKKAAG	21	IP_1020044
RDMRQRVAVGVIKAVDKKAAGAGKVTKS	28	IP_1020044
FGSRNGKTSKKITI	14	IP_1020636
KTEWLDGKHVVF	12	IP_1020636
ANAGPNTNGSQFFICTAKTEWLDGKHVVF	29	IP_1020636
GSRNGKTSKKIT	12	IP_1020636
TAKTEWLDGKHVVF	14	IP_1020636
ANAGPNTNGSQFFICTA	17	IP_1020636
KTEWLDGKHVV	11	IP_1020636
YGEKFEDENFILKH	14	IP_1020636
EDENFILKH	9	IP_1020636
KTEWLDGKHV	10	IP_1020636
AKTEWLDGKHVVF	13	IP_1020636
RSIYGEKFEDENFIL	15	IP_1020636
TGCRSIYGEKFEDENFIL	18	IP_1020636
AKTEWLDGKHV	11	IP_1020636
GSRNGKTSKKITI	13	IP_1020636
KTEWLDGKHVVFGKGKEVMNIVEA	24	IP_1020636
FGSRNGKTSKKI	12	IP_1020636
ANAGPNTNGSQF	12	IP_1020636
ANAGPNTNGSQFFICTAKTEWLDGKHVV	28	IP_1020636
ANAGPNTNGSQFF	13	IP_1020636
GCRSIYGEKFEDENFILKH	19	IP_1020636
QGGDFTRHNG	10	IP_1020636
GEKFEDENFILKH	13	IP_1020636
AKTEWLDGKHVV	12	IP_1020636
TEWLDGKHVV	10	IP_1020636
GEKFEDENFILK	12	IP_1020636
STGEKGFGYK	10	IP_1020636
ALSTGEKGFGYK	12	IP_1020636
TEWLDGKHVVFGKGKEVMNIVEA	23	IP_1020636
TEWLDGKHVVF	11	IP_1020636
AKTEWLDGKHVVFGKGKEVMNIVE	24	IP_1020636
QGGDFTRH	8	IP_1020636
FGSRNGKTSKKIT	13	IP_1020636
YGEKFEDENFILK	13	IP_1020636
FICTAKTEWL	10	IP_1020636
TEWLDGKHVVFGKGKEVMN	19	IP_1020636
KTEWLDGKHVVFGKGKEVMN	20	IP_1020636
STGEKGFGYKGS	12	IP_1020636
EKFEDENFILKH	12	IP_1020636
EKFEDENFILKHTGPG	16	IP_1020636
DENFILKHTGPG	12	IP_1020636
ALSTGEKGFGYKGS	14	IP_1020636
TEWLDGKHVVFG	12	IP_1020636
SIYGEKFEDENFILK	15	IP_1020636
WLDGKHVVF	9	IP_1020636
GKHVVFGKGKEVMN	14	IP_1020636
EWLDGKHVVF	10	IP_1020636
KTEWLDGKHVVFG	13	IP_1020636
APKAKKEAPVPPKAEAKAKALK	22	IP_1021179
VPPKAEAKAKALK	13	IP_1021179
PAINVNDSVTKSKFDNL	17	IP_1023661
GPFKPDHYRY	10	IP_1023661
THPDKYPVGVHFL	13	IP_1023661
NGPFKPDHYRY	11	IP_1023661
PFKPDHYRY	9	IP_1023661
VKLTKLTEKQAQYLGMPVNGPFKPDHYRY	29	IP_1023661
WTHPDKYPVGVHFL	14	IP_1023661
SGIRGISEETTTGVHNL	17	IP_1023661
TTGNKVFGALKGAVDGGLSIPHSTKRFPGYDSESKVFNAEVHRKHIMGQ	49	IP_1025516
YPPPPPPLQRKC	12	IP_1026473
PVERSNR	7	IP_1028504
PPPPPPPPPPPPPPPPPPLWIKQTL	25	IP_1032815
QAILQHLCENIHVCSVPFGLHYLEALEATVY	31	IP_1036367
FFKIFKNLK	9	IP_1037716
TSKRPSNVVSK	11	IP_1040369
GKVIPELNGKLTGMAFRVPTPNVSAVDLTCRLEKPAKYDDIKKVVKQASEDPLKGVLGYTE	61	IP_1042067
SGDAAIVDMVPGKP	14	IP_1042203
AVRVMRQTVAVGVIKAVDK	19	IP_1042203
GPKFLKSGDA	10	IP_1042203
GPKFLKSGDAA	11	IP_1042203
GPKFLKSGD	9	IP_1042203
VMRQTVAVGVIKAVDKKAA	19	IP_1042203
DGPKFLKSGD	10	IP_1042203
GPKFLKSGDAAIVD	14	IP_1042203
KVTKSAQKSQK	11	IP_1042203
DKKYNSTWHCIVGRNFGSYVTHETKLFIYFYLGQVAILLFKSG	43	IP_1042210
KYNSTWHCIVGRNFGSYVTHETKLFIYFYLGQVAILLFKSG	41	IP_1042210
SNRVVNLMAYMASKE	15	IP_1042280
AGVTVDELGKVLTPTQVMNRPSSISWDGL	29	IP_1042283
RVDYAGVTVDELGKVLTPTQVM	22	IP_1042283
QEVDEPPQHALRVDYAGVTVDELGKVLTPTQV	32	IP_1042283
KGNDISSGTVLSDYVGSGPPSGTGLHRYVW	30	IP_1042283
KGNDISSGTVLSDYVGSGPPSGTGLHRY	28	IP_1042283
AGVTVDELGKVLTPTQVMNRPSSISW	26	IP_1042283
AGVTVDELGKVLTPTQVMNR	20	IP_1042283
KGNDISSGTVLSDYVGSGPPSGTGLHR	27	IP_1042283
YQAEWDDYVPKLYEQLSGK	19	IP_1042283
KGNDISSGTVLSDYVGSGPPSGTGLHRYVWL	31	IP_1042283
GVTVDELGKVLTPTQVMNR	19	IP_1042283
WDDYVPKLYEQLSGK	15	IP_1042283
NMKGNDISSGTVLSDYVGSGPPSGTGLHRYVW	32	IP_1042283
GNDISSGTVLSDYVGSGPPSGTGLHRYVW	29	IP_1042283
GVTVDELGKVLTPTQVMNRPSSISWDGL	28	IP_1042283
VDEPPQHALRVDYAGVTVDELGKVLTPTQV	30	IP_1042283
RVDYAGVTVDELGKVLTPTQVMNR	24	IP_1042283
TPTQVMNRPSSISWDGLDPGKLYTL	25	IP_1042283
SSGTVLSDYVGSGPPSGTGLHRYVW	25	IP_1042283
SDYVGSGPPSGTGLHRYVW	19	IP_1042283
MNRPSSISWDGLDPGKLYTL	20	IP_1042283
KGNDISSGTVLSDYVGSGPPSGTGLHRYVWLV	32	IP_1042283
QAEWDDYVPKLYEQLSGK	18	IP_1042283
DYVPKLYEQLSGK	13	IP_1042283
GKVLTPTQVMNRPSSISWDGL	21	IP_1042283
SDYVGSGPPSGTGLHRY	17	IP_1042283
NRPSSISWDGLDPGKLYTLV	20	IP_1042283
NRPSSISWDGLDPGKLYTL	19	IP_1042283
MNRPSSISWDGLDPGKLYTLV	21	IP_1042283
RGKFKVETFRKK	12	IP_1042283
SDYVGSGPPSGTGLHR	16	IP_1042283
NRPSSISWDGLDPGKLY	17	IP_1042283
PSSISWDGLDPGKLYTL	17	IP_1042283
VDYAGVTVDELGKVLTPTQVMN	22	IP_1042283
RPSSISWDGLDPGKLYT	17	IP_1042283
RVDYAGVTVDELGKVLTPTQV	21	IP_1042283
DYAGVTVDELGKVLTPTQVMNRPSSISWDGL	31	IP_1042283
QEVDEPPQHALRVDYAGVTVDELGKVLTPTQVMN	34	IP_1042283
RGKFKVETFRKKYN	14	IP_1042283
RVDYAGVTVDELGKVLTPTQVMNRPSSISW	30	IP_1042283
RPSSISWDGLDPGKL	15	IP_1042283
EWDDYVPKLYEQLSGK	16	IP_1042283
QEVDEPPQHALRVDY	15	IP_1042283
MNRPSSISWDGLDPGKL	17	IP_1042283
AEWDDYVPKLYEQLSGK	17	IP_1042283
QEVDEPPQHALRVDYA	16	IP_1042283
NRPSSISWDGLDPGKL	16	IP_1042283
VLTDPDAPSRKDPKFREW	18	IP_1042283
DDYVPKLYEQLSGK	14	IP_1042283
QEVDEPPQHALR	12	IP_1042283
QEVDEPPQHALRV	13	IP_1042283
QEVDEPPQHALRVDYAGVTVDELGKVLTPTQVMNR	35	IP_1042283
AADISQWAGPLCLQE	15	IP_1042283
YVPKLYEQLSGK	12	IP_1042283
SDYVGSGPPSGTGLHRYVWL	20	IP_1042283
VGSGPPSGTGLHRYVW	16	IP_1042283
PSSISWDGLDPGKL	14	IP_1042283
KSGDNRGKFKVETFRKK	17	IP_1042283
YAGVTVDELGKVLTPTQVMNRPSSISWDGL	30	IP_1042283
VDEPPQHALRVDYA	14	IP_1042283
QEVDEPPQHALRVD	14	IP_1042283
GVTVDELGKVLTPTQV	16	IP_1042283
VDYAGVTVDELGKVLTPTQV	20	IP_1042283
KGNDISSGTVLSDYVGSGPPSGTGLH	26	IP_1042283
QEVDEPPQHALRVDYAGVTVDELGKVLTPTQVMNRPSSISWDGL	44	IP_1042283
LQEVDEPPQHALRVDYAGVTVDELGKVLTPTQV	33	IP_1042283
SSISWDGLDPGKL	13	IP_1042283
GVTVDELGKVLTPTQVMNRPSSISWDGLDPGKLYTL	36	IP_1042283
YAGVTVDELGKVLTPTQVMNRPSSISWDGLDPGKLYTL	38	IP_1042283
AGVTVDELGKVLTPTQVMNRPSSISWDGLDPGKLYTL	37	IP_1042283
VDEPPQHALRVDY	13	IP_1042283
KSGDNRGKFKVETFRKKY	18	IP_1042283
RVDYAGVTVDELGKVLTPTQVMNRPSSISWDGL	33	IP_1042283
AADISQWAGPLCL	13	IP_1042283
AGVTVDELGKVLTPTQV	17	IP_1042283
EVDEPPQHALRVDYAGVTVDELGKVLTPTQVMNR	34	IP_1042283
GKVLTPTQVMNR	12	IP_1042283
GSGPPSGTGLHRYVW	15	IP_1042283
QEVDEPPQHALRVDYAGVTVDELGKVLTPTQVM	33	IP_1042283
RVDYAGVTVDELGKVLTPTQVMNRPSSISWDGLDPGKLYTL	41	IP_1042283
VLTDPDAPSRKD	12	IP_1042283
DEPPQHALRVDYA	13	IP_1042283
YEQLSGK	7	IP_1042283
GKVLTPTQVMN	11	IP_1042283
QEVDEPPQHALRVDYAGVTVDELGKVLTPTQVMNRPSSISWDGLDPGKLYTL	52	IP_1042283
GKVLTPTQVMNRPSSISWDGLDPGKLYTL	29	IP_1042283
TDPDAPSRKDPKFREW	16	IP_1042283
SGPPSGTGLHRYVW	14	IP_1042283
AADISQWAGPL	11	IP_1042283
NRPSSISWDGL	11	IP_1042283
AGVTVDELGKVLTPTQVM	18	IP_1042283
DEPPQHALRVDY	12	IP_1042283
QEVDEPPQHALRVDYAG	17	IP_1042283
DYAGVTVDELGKVLTPTQVMNRPSSISW	28	IP_1042283
KSGDNRGKFKVETF	14	IP_1042283
QEVDEPPQHALRVDYAGVTVDELGKVLTPTQVMNRPSSISWDGLDPGKLYTLVLTDPDAPSRKDPKFREWHFLVVNM	77	IP_1042283
VLTDPDAPSRKDPK	14	IP_1042283
GKVLTPTQVM	10	IP_1042283
AGPLCLQEVDEPPQHALRVDY	21	IP_1042283
AADISQWAGPLCLQEVDEPPQHALRV	26	IP_1042283
DYAGVTVDELGKVLTPTQVMNRPSSISWDGLDPGKLYTL	39	IP_1042283
AGPLCLQEVDEPPQHALRV	19	IP_1042283
RPSSISWDGLDPGKLYTL	18	IP_1042283
NMKGNDISSGTVLSDYVGSGPPSGTGLHRYVWL	33	IP_1042283
AADISQWAGPLCLQEVDEPPQHAL	24	IP_1042283
GNDISSGTVLSDYVGSGPPSGTGLHR	26	IP_1042283
YAGVTVDELGKVLTPTQVMNRPSSISW	27	IP_1042283
GNDISSGTVLSDYVGSGPPSGTGLHRYVWLVY	32	IP_1042283
AADISQWAGPLCLQEVDEPPQHALR	25	IP_1042283
AADISQWAGPLCLQEVDEPPQHALRVDY	28	IP_1042283
VDYAGVTVDELGKVLTPTQVMNR	23	IP_1042283
DGLDPGKLYTLVLTDPDAPSRKDPKFREW	29	IP_1042283
DPGKLYTLVLTDPDAPSRKDPKFREW	26	IP_1042283
AADISQWAGPLCLQEVDEPPQHALRVDYAGVTVDELGKVLTPTQVMNR	48	IP_1042283
AGPLCLQEVDEPPQHALRVDYAGVTVDELGKVLTPTQV	38	IP_1042283
VDYAGVTVDELGKVLTPTQVM	21	IP_1042283
AADISQWAGPLCLQEVDEPPQHALRVDYAGVTVDELGKVLTPTQVMNRPSSISWDGLDPGKLYTL	65	IP_1042283
DELGKVLTPTQVMNRPSSISWDGLDPGKLYTL	32	IP_1042283
AADISQWAGPLCLQEVDEPPQHALRVDYAGVTVDELGKVLTPTQVMNRPSSISW	54	IP_1042283
SDYVGSGPPSGTGLHRYVWLVYEQEQPLSCDEPILSNKSGDNRGKFKVETFRKKYNLGAPAAGTCYQAEWDDYVPKLYEQLSGK	84	IP_1042283
PSSISWDGLDPGKLYTLVLTDPDAPSRKDPKFREW	35	IP_1042283
MNRPSSISWDGL	12	IP_1042283
SDYVGSGPPSGTGLHRYVWLVY	22	IP_1042283
RVDYAGVTVDELGKVLTPTQVMNRPSSISWDGLDPGKLYT	40	IP_1042283
RPSSISWDGL	10	IP_1042283
KSGDNRGKFKVETFRKKYNL	20	IP_1042283
SNKSGDNRGKFKVETFRKK	19	IP_1042283
AADISQWAGPLCLQEVDEPPQHALRVDYAGVTVDELGKVLTPTQV	45	IP_1042283
RVDYAGVTVDELGKVLTPTQVMNRPSSISWDGLDPGKLY	39	IP_1042283
KSGDNRGKFKVETFRKKYNLGA	22	IP_1042283
GKVLTPTQVMNRPSSISW	18	IP_1042283
MKGNDISSGTVLSDYVGSGPPSGTGLHRY	29	IP_1042283
KGNDISSGTVLSDYVGSGPPSGTGL	25	IP_1042283
GVTVDELGKVLTPTQVMNRPSSISW	25	IP_1042283
ADISQWAGPLCLQEVDEPPQHALRVDY	27	IP_1042283
VLTDPDAPSRKDPKFREWH	19	IP_1042283
AADISQWAGPLCLQEVDEPPQHALRVD	27	IP_1042283
GVTVDELGKVLTPTQVMN	18	IP_1042283
TCYQAEWDDYVPKLYEQLSGK	21	IP_1042283
KGNDISSGTVL	11	IP_1042283
KSGDNRGKFKVETFRK	16	IP_1042283
KSGDNRGKFKVETFRKKYN	19	IP_1042283
AGPLCLQEVDEPPQHAL	17	IP_1042283
AGPLCLQEVDEPPQHALRVD	20	IP_1042283
GVTVDELGKVL	11	IP_1042283
ADISQWAGPLCLQEVDEPPQHAL	23	IP_1042283
VDEPPQHALRVDYAGVTVDEL	21	IP_1042283
PLCLQEVDEPPQHALRVDYAGVTVDELGKVLTPTQV	36	IP_1042283
ISQWAGPLCLQEVDEPPQHAL	21	IP_1042283
DEPILSNKSGDNRGKFKVETFRKKY	25	IP_1042283
VDYAGVTVDELGKVLTPTQVMNRPSSISWDGL	32	IP_1042283
SDYVGSGPPSGTGLHRYVWLVYEQEQPLSCDEPILSN	37	IP_1042283
AGPLCLQEVDEPPQHALRVDYAGVTVDEL	29	IP_1042283
PTQVMNRPSSISWDGLDPGKLYTL	24	IP_1042283
KGNDISSGTVLSDYVGSGPPSGTGLHRYVWLVY	33	IP_1042283
SNKSGDNRGKFKVETFRKKY	20	IP_1042283
AGVTVDELGKVLTPTQVMNRPSSISWDGLDPGKLYTLVL	39	IP_1042283
VVNMKGNDISSGTVLSDYVGSGPPSGTGLHRYVWL	35	IP_1042283
MNRPSSISWDGLDPGKLYTLVL	22	IP_1042283
KGNDISSGTVLSDYVGSGPPSGTGLHRYVWLVYE	34	IP_1042283
NKSGDNRGKFKVETFRKK	18	IP_1042283
TPTQVMNR	8	IP_1042283
AADISQWAGPLCLQEVDEPPQHALRVDYAGVTVDELGKVLTPTQVMN	47	IP_1042283
RVDYAGVTVDELGKVLTPTQVMNRPSSISWDGLDPGKLYTLVL	43	IP_1042283
VDEPPQHALRVDYAGVTVDELGKVLTPTQVMNRPSSISWDGLDPGKLYTL	50	IP_1042283
AGPLCLQEVDEPPQHALRVDYA	22	IP_1042283
PLCLQEVDEPPQHAL	15	IP_1042283
DEPILSNKSGDNRGKFKVETF	21	IP_1042283
KSGDNRGKFKVET	13	IP_1042283
SDYVGSGPPSGTGLHRYV	18	IP_1042283
VPKLYEQL	8	IP_1042283
RVDYAGVTVDELGKVLTPTQVMN	23	IP_1042283
AADISQWAGPLCLQEVDEPPQHALRVDYAGVTVDELGKVLTPTQVMNRPSSISWDGL	57	IP_1042283
VTVDELGKVLTPTQVMNR	18	IP_1042283
DEPILSNKSGDNRGKFKVETFRKK	24	IP_1042283
ADISQWAGPLCLQEVDEPPQHALRVDYA	28	IP_1042283
LTDPDAPSRKDPKFREW	17	IP_1042283
MNRPSSISWDGLDPGKLYT	19	IP_1042283
GNDISSGTVLSDYVGSGPPSGTGLHRYV	28	IP_1042283
AADISQWAGPLCLQEVDEPPQHALRVDYAGVTV	33	IP_1042283
LDPGKLYTLVLTDPDAPSRKDPKFREW	27	IP_1042283
VGSGPPSGTGLHR	13	IP_1042283
MKGNDISSGTVLSDYVGSGPPSGTGLHRYVW	31	IP_1042283
AADISQWAGPLCLQEVDEPPQHALRVDYAGVTVDELGKVLTPTQVM	46	IP_1042283
QAEWDDYVPKLYEQL	15	IP_1042283
AADISQWAGPLCLQEVDEPPQHALRVDYAGVTVDELGKVL	40	IP_1042283
YAGVTVDELGKVLTPTQVMNRPSSI	25	IP_1042283
PLCLQEVDEPPQHALRV	17	IP_1042283
PLCLQEVDEPPQHALRVDY	19	IP_1042283
KSGDNRGKFKV	11	IP_1042283
VDEPPQHALRV	11	IP_1042283
VDEPPQHALRVDYAGVTVDELGKVLTPTQVMNRPSSISWDGL	42	IP_1042283
SDYVGSGPPSGTGLHRYVWLVYEQEQPLSC	30	IP_1042283
SDYVGSGPPSGTGLHRYVWLV	21	IP_1042283
AADISQWAGPLCLQEVDEPPQHALRVDYAGV	31	IP_1042283
VLTDPDAPSRKDPKFRE	17	IP_1042283
GKVLTPTQVMNRPSSISWDGLDPGKLYTLVL	31	IP_1042283
VMNRPSSISWDGLDPGKLY	19	IP_1042283
GKVLTPTQVMNRPSSISWDGLDPGKLYTLV	30	IP_1042283
MNRPSSISWDGLDPGKLYTLVLTDP	25	IP_1042283
GKVLTPTQVMNRPSSISWDGLDPGKLYT	28	IP_1042283
EQEQPLSCDEPILSNKSGDNRGKFKVETFRKK	32	IP_1042283
CLQEVDEPPQHALRVDYAGVTVDELGKVLTPTQV	34	IP_1042283
PSSISWDGL	9	IP_1042283
VDEPPQHALR	10	IP_1042283
DDYVPKLYEQL	11	IP_1042283
PILSNKSGDNRGKFKVETFRKK	22	IP_1042283
PDAPSRKDPKFREW	14	IP_1042283
DYAGVTVDELGKVLTPTQV	19	IP_1042283
RVDYAGVTVDEL	12	IP_1042283
AGVTVDELGKVLTPTQVMN	19	IP_1042283
ETFRKKYNLGAPAAGTCYQAEWDDYVPKLYEQLSGK	36	IP_1042283
KGNDISSGTVLSDY	14	IP_1042283
MKGNDISSGTVLSDYVGSGPPSGTGLHRYVWL	32	IP_1042283
STGEKGFGYKGSSFHR	16	IP_1042284
STGEKGFGYKGSSFHRII	18	IP_1042284
ADKVPKTAENFRALSTGEKGFGYKGSSF	28	IP_1042284
RVSFELFADKVPKTAENF	18	IP_1042284
ALSTGEKGFGYKGSSFH	17	IP_1042284
STGEKGFGYKGSSFH	15	IP_1042284
RALSTGEKGFGYKGSSF	17	IP_1042284
DDEPLGRVSFELFADKVPKTAENFRAL	27	IP_1042284
ADKVPKTAENFRALSTGEKGFGY	23	IP_1042284
DITADDEPLGRVSFELFADKVPKTAENF	28	IP_1042284
ALSTGEKGFGYKGSSFHR	18	IP_1042284
ADKVPKTAENFRALSTGEKGFGYKGSSFHRII	32	IP_1042284
FDITADDEPLGRVSFELFADKVPKTAENFRAL	32	IP_1042284
PKTAENFRALSTGEKGFGYKGSSFHRII	28	IP_1042284
STGEKGFGYKGSSF	14	IP_1042284
ALSTGEKGFGYKGSSF	16	IP_1042284
DITADDEPLGRVSF	14	IP_1042284
DITADDEPLGRVSFELFADKVPKTAENFRAL	31	IP_1042284
DKVPKTAENFRALSTGEKGFGYKGSSFHRII	31	IP_1042284
ITADDEPLGRVSFELFADKVPKTAENFRAL	30	IP_1042284
VNPTVFFDITADDEPLGRVSFELFADKVPKTAENFRAL	38	IP_1042284
VNPTVFFDITADDEPLGRVSFEL	23	IP_1042284
ADKVPKTAENFRALSTGEKGFGYKGSSFHRIIPGF	35	IP_1042284
ITADDEPLGRVSFEL	15	IP_1042284
PKTAENFRALSTGEKGFGY	19	IP_1042284
ELFADKVPKTAENFRALSTGEKGFGYKGSSFHRIIPGFTC	40	IP_1042284
RALSTGEKGFG	11	IP_1042284
RALSTGEKGFGYKGSSFHRII	21	IP_1042284
RALSTGEKGFGYKGSSFHR	19	IP_1042284
RALSTGEKGFGYKGSSFH	18	IP_1042284
PKTAENFRALSTGEKGFGYKGSSFHR	26	IP_1042284
VNPTVFFDITADDEPLGRVSF	21	IP_1042284
DKVPKTAENFRALSTGEKGFGY	22	IP_1042284
NPTVFFDITADDEPLGRVSFELFADKVPKTAENFRAL	37	IP_1042284
ADKVPKTAENFRALSTGEKGFGYKG	25	IP_1042284
TGEKGFGYKGSSFHRII	17	IP_1042284
PKTAENFRALSTGEKGFGYKGSSF	24	IP_1042284
TADDEPLGRVSF	12	IP_1042284
DKVPKTAENFRALSTGEKGFGYKGSSF	27	IP_1042284
DKVPKTAENFRALSTGEKGFGYKGSSFHR	29	IP_1042284
ADDEPLGRVSFELFADKVPKTAENFRAL	28	IP_1042284
RALSTGEKGFGYKGSS	16	IP_1042284
RALSTGEKGFGYK	13	IP_1042284
RALSTGEKGFGY	12	IP_1042284
FDITADDEPLGRVS	14	IP_1042284
VNPTVFFDITADDEPLGRVSFELFADKVPKTAENF	35	IP_1042284
DITADDEPLGRVS	13	IP_1042284
FDITADDEPLGR	12	IP_1042284
ADDEPLGRVSFEL	13	IP_1042284
DDEPLGRVSFELFADKV	17	IP_1042284
ELFADKVPKTAENFRALSTGEKGFGYKGSSF	31	IP_1042284
DDEPLGRVSFELF	13	IP_1042284
RALSTGEKGFGYKG	14	IP_1042284
DITADDEPLGRVSFELF	17	IP_1042284
RALSTGEKGFGYKGSSFHRIIPGFTC	26	IP_1042284
RALSTGEKGFGYKGSSFHRIIPG	23	IP_1042284
FDITADDEPLGRVSF	15	IP_1042284
ALSTGEKGFGYKGSSFHRIIPGF	23	IP_1042284
STGEKGFGYKGSSFHRIIPG	20	IP_1042284
FDITADDEPLGRVSFEL	17	IP_1042284
RALSTGEKGFGYKGSSFHRIIPGFT	25	IP_1042284
ALSTGEKGFGYKGSSFHRIIPG	22	IP_1042284
ALSTGEKGFGYKGSS	15	IP_1042284
GFGYKGSSFHR	11	IP_1042284
TGEKGFGYKGSSFHRIIPG	19	IP_1042284
TGEKGFGYKGSSFHR	15	IP_1042284
MVNPTVFFDITADDEPLGRVSFELF	25	IP_1042284
STGEKGFGYKGSS	13	IP_1042284
KPATKGLVICSRNRAKRRK	19	IP_1043033
ILLEATGGSYFLLL	14	IP_1049346
VDTNLQKQREIQKANQEQ	18	IP_1051751
ISWYDNEYGYSNRVVNLMAHMASKE	25	IP_1052821
SWDDMEKIWHHTF	13	IP_1053598
VDRVKLLIEMEQRLEQGQAIDDLMPAQK	28	IP_1053643
SHYEEGPGKNLPFSVENKWQLL	22	IP_1059380
SHYEEGPGKNLPFSVENKWQLLAMMTVYFGSGFAAPFFIVRHQLLKK	47	IP_1059380
YGEKFEDENFILKHTGPGILSMANAGPNRKDSQFLIC	37	IP_1061067
GSRFIYGEKFEDENFILKHTGPGILSM	27	IP_1061067
LAQSLPGPGPKGNSV	15	IP_1062627
TFPVTR	6	IP_1067496
APQGLLLR	8	IP_1071762
VGPGIGTVF	9	IP_1072519
GVIKAVDKKAAGAAK	15	IP_1072575
VKVGVNGFGRIVCL	14	IP_1072617
VKVGVNGFGRIVCLVT	16	IP_1072617
LISGYDNEYGYSNRVVDLMAYMASKE	26	IP_1078649
ISGYDNEYGYSNRVVDLMAYMASKE	25	IP_1078649
PKRKAEGDAKGDKTKVKDEPQRRSARLSAKPAPPKPEPKPKKAPAKKGEKVPKGKKGKANAGKDANNPAENGDAKTDQAQKAEGAGDAK	89	IP_1078763
PKRKAEGDAKGDKTKVKDEPQRRSARLSAKPAPPKPEPKPKKAPAKKGEKVPKGKKGKANAGKDANNPAENGDAKTDQAQKAEGAGDA	88	IP_1078763
PKRKAEGDAKGDKTKVKDEPQRRSARLSAKPAPPKPEPKPKKAPAKKGEKVPKGKKGKANAGKDANNPAENGDAKTD	77	IP_1078763
AKPAPPKPEPKPKKAPAKKGEKVPKGKKGKANAGKDANNPAENGDAKTDQAQKAEGAGDAK	61	IP_1078763
GPETILASLC	10	IP_1079827
APPTAYPPSPPPAK	14	IP_1081770
MHLRIRPGQGLGEGNKILP	19	IP_1086752
ILINNNISCLYSVSISIYSRKT	22	IP_1088608
MPPPPPPPPSPVHAHFLLQ	19	IP_1089395
PASTGAPAQPSRPTPTSASVPLGSEVDTVKMLLP	34	IP_1092106
YGPMKGSSFGGRSSGSPYGGGYGSGGGSGGYGSRRF	36	IP_1092449
NDFGNYSGQQQSNYGPMKGSSFGGRSSGSPYGGGYGSGGGSGGYGSRR	48	IP_1092449
FGGGNYGGGGNYNDFGNYSGQQQSNYGPMKGSSFGGRSSGSPYGGGYGSGGGSGGYGSRRF	61	IP_1092449
NYGPMKGSSFGGRSSGSPYGGGYGSGGGSGGYGSRRF	37	IP_1092449
YNDFGNYSGQQQSNYGPMKGSSFGGRSSGSPYGGGYGSGGGSGGYGSRRF	50	IP_1092449
SSWWTHVEMEPPDPILEVIETFKRDT	26	IP_1092804
PGVTVKDVNQQEFVRALAAFLKKSRKLKVPEWVDT	35	IP_1092808
PGVTVKDVNQQEFVRALAAFLKKSRKLKVPEWVDTV	36	IP_1092808
GVTVKDVNQQEFVRALAAFLKKSRKLKVPEWVDTVKL	37	IP_1092808
PGVTVKDVNQQEFVRALAAFLKKSRKLK	28	IP_1092808
PGVTVKDVNQQEFVRALAAFLKKSRKLKVPEWVDTVKL	38	IP_1092808
FLKKSRKLKVPEWVDTVKLAKHK	23	IP_1092808
MRIKPDPFIFL	11	IP_1093788
IVEGLMTTVHGITATQKTVDGPS	23	IP_1093794
ALDFEQEMATAASSSSLEKSYKLPDGQVITI	31	IP_1099887
NDFGNYNNQSSNFGPK	16	IP_1099974
LFFSFLFFPFLSFPFLF	17	IP_1100473
PAAAPAAAGLPA	12	IP_1102041
LNTLAIFLLNKKLN	14	IP_1102827
LLPVEHPKMLMDKILHLVTFH	21	IP_1108991
ALVRKAADYVQSKDFRDYLMSTHFWGPVAN	30	IP_1109204
TVVAVGSGRKGKSGEIEPVSVK	22	IP_1110661
GSGRKGKSGEIEPVSVKV	18	IP_1110661
GAAQNIIPASTGAAKAVGKVIPELNGKLTGMAFRVPTRNVSVV	43	IP_1110766
SIMAYMASKE	10	IP_1110883
ATIAGWSIMAYMASKE	16	IP_1110883
FAKLVRPPVQVYGIEGRYATALYSAASKKKKLD	33	IP_1111537
FAKLVRPPVQVYGIEGRYATALYSAASKK	29	IP_1111537
RRGHEAFGMRSRRRADCLREEIWKQSSGMGL	31	IP_1112052
VKVGVNGFGLIGRLVT	16	IP_1112494
MRYVASYLLAALGGNSSPSAKDIKKILGSVGIEADDDRLNKVISELNGKNIEDVIAQGVGKLA	63	IP_1118173
MRYVASYLLAALGGNSSPSAKDIKKILGSVGIEADDDRLNKVISELNGKNIEDVIAQGVGKLASVPAGGAVAVS	74	IP_1118173
AALGGNSSPSAKDIKKILGSVGIEADDDRLNKVISELNGKNIEDVIAQGVGKLA	54	IP_1118173
GSKMTSATRVVQVVKPHGPLIKFPNRRDKPKLSASEALGSAALPSH	46	IP_1119139
NDFASAVRILEVVKDKAGLHKEIYPYVIQELRPTL	35	IP_1119806
NDFASAVRILEVVKDKAGLHKEIYPYVIQELRPTLNEL	38	IP_1119806
NDFASAVRILEVVKDKAGLHKEIYPYVIQEL	31	IP_1119806
LEDGHTLSDYNIQKESTLHLVLRLR	25	IP_1119889
AEEGIAAGGVMDVITALQEVLKT	23	IP_1120444
MAEEGIAAGGVMDVITALQEVLKT	24	IP_1120444
AEEGIAAGGVMDVITALQEVLKTALIHDGLARGIREA	37	IP_1120444
RFDGQPINETDTPAQLEMEDEDTTDVFQQQTGG	33	IP_1120445
LMLQAVDLLADAVAVTMGPKGR	22	IP_1121048
KDVKFGADARALMLQAVDLLADAVAVTMGPKGR	33	IP_1121048
GADARALMLQAVDLLADAVAVTMGPKGR	28	IP_1121048
AAGVASLLTTAEAVVTEIPKEE	22	IP_1121048
AAGVASLLTTAEAVVTEIPKEEKDPGMG	28	IP_1121048
AAGVASLLTTAEAVVTEIPKEEKDPGMGAMG	31	IP_1121048
AVVTEIPKEEKDPGMGAMG	19	IP_1121048
LTTAEAVVTEIPKEEKDPGMGAM	23	IP_1121048
GVASLLTTAEAVVTEIPKEE	20	IP_1121048
TIAKNAGVEGSLIVEKILQS	20	IP_1121048
LTTAEAVVTEIPKEEKDPGMGAMG	24	IP_1121048
AGVASLLTTAEAVVTEIPKEE	21	IP_1121048
KNAGVEGSLIVEKILQS	17	IP_1121048
TIAKNAGVEGSLIVEKILQ	19	IP_1121048
TIAKNAGVEGSLIVEKILQSS	21	IP_1121048
LDAAGVASLLTTAEAVVTEIPKEEKDPGMGAMG	33	IP_1121048
KPANEDQKIGIEII	14	IP_1121048
VNMVEKGIIDPTKVVRTALLDAAGVASL	28	IP_1121048
LTTAEAVVTEIPKEEKDPGM	20	IP_1121048
VVTEIPKEEKDPGMG	15	IP_1121048
DQKIGIEIIKRALKIP	16	IP_1121048
AVVTEIPKEEKDPGMG	16	IP_1121048
LGDFVNMVEKGIIDPTKVVR	20	IP_1121048
AGVASLLTTAEAVVTEIPKEEKDPGMGAMG	30	IP_1121048
NAGVEGSLIVEKILQS	16	IP_1121048
VASLLTTAEAVVTEIPKEEKDPGMGAM	27	IP_1121048
GVASLLTTAEAVVTEIPKEEKDPGMGAM	28	IP_1121048
IGIEIIKRALKIP	13	IP_1121048
TTAEAVVTEIPKEEKDPGMGAM	22	IP_1121048
VEGSLIVEKILQ	12	IP_1121048
TIAKNAGVEGSLIVEKILQSSSEVG	25	IP_1121048
DAAGVASLLTTAEAVVTEIPKEEKDPGMGAMG	32	IP_1121048
AGVASLLTTAEAVVTEIPKEEKDPGMG	27	IP_1121048
AVVTEIPKEEKDPGM	15	IP_1121048
EVGYDARLGDFVNMVEKGIIDPTKVVRTA	29	IP_1121048
DARALMLQAVDLLADAVAVTMGPKGRTVI	29	IP_1121048
LLTTAEAVVTEIPKEEKDPGMGAMG	25	IP_1121048
EDQKIGIEIIKRALKIP	17	IP_1121048
EKGIIDPTKVVRTALLDAAGVASL	24	IP_1121048
RLGDFVNMVEKGIIDPTKVVRTA	23	IP_1121048
DARALMLQAVDLLADAVAVTMGPKGRTVIIEQ	32	IP_1121048
EDQKIGIEIIKRALKIPA	18	IP_1121048
RLGDFVNMVEKG	12	IP_1121048
TTSAVTVRSAIRRLKELKDQ	20	IP_1121109
SAVTVRSAIRRLKELKDQ	18	IP_1121109
SEYHPKIKGEHPGLSIGDVAKKLGEMW	27	IP_1121285
SEYHPKIKGEHPGLSIGDVAKKLGEM	26	IP_1121285
MQIFVKTLTGKTITFEVEPSDTIKNVKVKIQDKEGIPVDQQRLVFAGKQLQDGRTLSNYYIQNHSTLYLVLR	72	IP_1121384
CLEGLPQHLPPLLPIPGGIEPT	22	IP_1131960
MPHVRNLQ	8	IP_1132445
QAPAPAPAPR	10	IP_1134950
LSLLEAATDVGLFSAELR	18	IP_1134966
RHLPPEGLWAL	11	IP_1138383
SLFKLSH	7	IP_1139188
ESGLLDSGRL	10	IP_1139872
APQGSLGEYLFERLTLKHD	19	IP_1140490
GAPQGSLGEYLFERLTLKHD	20	IP_1140490
GSLGEYLFERLTLKHD	16	IP_1140490
APQGSLGEYLFERL	14	IP_1140490
QGSLGEYLFERLTLKHD	17	IP_1140490
QTGAPQGSLGEYLFERLTLKHD	22	IP_1140490
MGNHLTNLRRVAGPQPVQTGAPQGSLGEYLFERLTLKHD	39	IP_1140490
DVAKVYTLIRPNREKKAYVRLAPDYDALDVANKIGII	37	IP_1142593
PGVTVKDVNQQEFVKALAAFLKK	23	IP_1142692
PGVTVKDVNQQEFVKA	16	IP_1142692
PGVTVKDVNQQEF	13	IP_1142692
GRGAAQNIIPASTGAAKAAGKVIPELNGKLTGMAFRVPT	39	IP_1142819
KWDDYVPKLYEQLSGK	16	IP_1142837
DPGKLYTLVLTDPNAPSRKDPKFREWHHFLVVNM	34	IP_1142837
NRPSSISWDGLDPGKLYTLVLTDPNAPSRKDPKFREWHHFLVVNM	45	IP_1142837
AAGTCYQAKWDDYVPKLYEQLSGK	24	IP_1142837
DPGKLYTLVLTDPNAPSRKDPKFREWHHFLVV	32	IP_1142837
SGDNRGKFKVETFRKKYNLGAPAAGTCYQAKWDDYVPKLYEQLSGK	46	IP_1142837
YQAKWDDYVPKLYEQLSGK	19	IP_1142837
MNRPSSISWDGLDPGKLYTLVLTDPNAPSRKDPKFREWHHFLVVNM	46	IP_1142837
VLTDPNAPSRKDPKFREWHHFL	22	IP_1142837
MNRPSSISWDGLDPGKLYTLVLTDPNAPSRKDPKFREW	38	IP_1142837
RVDYAGVTVDELGKVLTPTQVMNRPSSISWDGLDPGKLYTLVLTDPNAPSRKDPKFREWHHFLVV	65	IP_1142837
DGLDPGKLYTLVLTDPNAPSRKDPKFREWHHFL	33	IP_1142837
PSSISWDGLDPGKLYTLVLTDPNAPSRKDPKFREWHHFL	39	IP_1142837
VLTDPNAPSRKDPKFREWHHFLVVNM	26	IP_1142837
DPGKLYTLVLTDPNAPSRKDPKFREWH	27	IP_1142837
AKWDDYVPKLYEQLSGK	17	IP_1142837
DPNAPSRKDPKFREWHHFLVVN	22	IP_1142837
MNRPSSISWDGLDPGKLYTLVLTDPNAPSRKDPKFREWHHF	41	IP_1142837
DPGKLYTLVLTDPNAPSRKDPKFREWHHFLVVN	33	IP_1142837
RVDYAGVTVDELGKVLTPTQVMNRPSSISWDGLDPGKLYTLVLTDPNAPSRKDPKFREWHHFLVVN	66	IP_1142837
MNRPSSISWDGLDPGKLYTLVLTDPNAPS	29	IP_1142837
MNRPSSISWDGLDPGKLYTLVLTDPNAPSRKDPKFREWHHFLVV	44	IP_1142837
DGLDPGKLYTLVLTDPNAPSRKDPKFREWHHFLVV	35	IP_1142837
EYGYSNRVVGLMAYMASKE	19	IP_1143116
ISWYDNEYGYSNRVVGLMAYMASKE	25	IP_1143116
GKGDPKKLRGQMSS	14	IP_1143170
GKIDTIEIITDRQPGKKRGFGFVTF	25	IP_1143303
FEEYGKIDTIEIITDRQPGKKRGFGFVT	28	IP_1143303
IEIITDRQPGKKRGFGF	17	IP_1143303
APGTITAARTNVLTL	15	IP_1144797
VWLELRDVEK	10	IP_1146539
APAASECR	8	IP_1148198
KGDLILT	7	IP_1148477
MASPGLK	7	IP_1149211
PGAGAPASRPRAPPPCPA	18	IP_1152781
RSDLPSH	7	IP_2407777
KSGKDIFLAEVP	12	IP_2413809
SPPPTAPWILGSA	13	IP_2414697
PSVLLTVMIL	10	IP_2419436
QGMFER	6	IP_2424601
GEPADRSSVKAGSAAGGR	18	IP_2431703
SDSIPSHTK	9	IP_2432440
GLGVTKAAESGNRYLEG	17	IP_2433971
PSGAILDCSSSLIQ	14	IP_2434364
LPSPMFTFL	9	IP_2438407
RPPGLSHSPLLCSLPAALPPPRPRDARASAAR	32	IP_2444178
SDFLSFSSFLPSFLPSFLPSFL	22	IP_2454202
SSLFLLPLLFSPLPPLSWWAQQFQLLRG	28	IP_2455245
LDPGIVYK	8	IP_2456248
PASASQVLGLKVCATTAQLFIY	22	IP_2462590
TLPTKETIEQVRTSE	15	IP_2464706
LVTIDNK	7	IP_2469441
VRPVSCGASASLGSHPAPPN	20	IP_2477871
PAAAAAPAPPAAASSPSARGSTHHQGLCSSAAAAAPARCLWCLLRGRGAVSAPSPCSPFPPPWPSAARAASAAAPSAAWGSGIGRRGLGAAAALWWLPD	99	IP_2477875
LGSDALSSAPELYPLKRNNTLYILNSIMF	29	IP_2479454
WEVFRSLGTFL	11	IP_2483228
GGPVSPR	7	IP_2489092
LPPSKIHA	8	IP_2491042
QRTKPGK	7	IP_2496680
KDVATVHSSEALMWV	15	IP_2505627
GIFVWLLEGI	10	IP_2509251
ELVGPASLSLSWVLSGSTLE	20	IP_2519091
LMLWPKAVAMATEVMAAPLP	20	IP_2537375
QGGQWGGGGGGHGPAR	16	IP_2547733
VAVGVVVVILM	11	IP_2548649
ENHWVTIAMSSLLSDAWRTEPGLQPL	26	IP_2549201
KLLASKYQQVGHIFCKPFLANNVSRDRTLQH	31	IP_2554406
LNLKFLPHKVVFPQ	14	IP_825063
QIFVKTLPGKTITLEVEPSDTIENVKAKIQDKEGIPPDQQRLIFAGKQLEDGRTLSDYNIQKESTLHLVLRLR	73	IP_825414
MQIFVKTLPGKTITLEVEPSDTIENVKAKIQDKEGIPPDQQRLIFAGKQLEDGRTLSDYNIQKESTLHLVLRLRGG	76	IP_825414
QIFVKTLPGKTITLEVEPSDTIENVKAKIQDKEGIPPDQQRLIFAGKQLEDGRTLSDYNIQKESTLHLVLRLRGG	75	IP_825414
MQIFVKTLPGKTITLEVEPSDTIENVKAKIQDKEGIPPDQQRLIFAGKQLEDGRTLSDYNIQKESTLHLVLRLR	74	IP_825414
FTKSSTEKKKKSQKAQED	18	IP_825506
VNTALQEVLKTAIIHD	16	IP_825679
AVNTALQEVLKT	12	IP_825679
PGLAVKEL	8	IP_826110
RVVDVMAYMASKE	13	IP_826165
SNRVVDVMAYMASKE	15	IP_826165
NRVVDVMAYMASKE	14	IP_826165
VDGKAPLATGEVDDDEVPDLVENFDEASKNEAN	33	IP_826291
PPKFNPNEVKVVYLR	15	IP_826958
RARGPAGALRGGGGRG	16	IP_827260
LVSLSTFQQIWISKQEYDESGPSIVH	26	IP_827552
GKRGAKSKQADVADQETTELPAENGETENQSPASEEEKEAKSD	43	IP_827673
EYHPTIKGEHPGLSIGDVAKKLGEM	25	IP_827704
MLRQIIGQAKKHPSLISLFIF	21	IP_828010
MLRQIIGQAKKHPSLISL	18	IP_828010
GHTTGIVMDSVDGVTHTVPIYEGY	24	IP_828140
YNEGGNFGGGNYDGGGNYNDFGNYSGQQQSNYGPMKGGSFGGRSSGSPYGGGYGSGGGSGGYGSRRF	67	IP_828334
KSKVKIKN	8	IP_829752
PKEAEQLRKLFIGGLSF	17	IP_830468
HDPKEAEQLRKLFIGGLSF	19	IP_830468
MQLFVKTLTGKTITLEVEPSDTN	23	IP_830483
TFRLILHLFASSCLFSLEGMF	21	IP_830547
WSERWKTMSAKEK	13	IP_830575
WEEHKKKHPDASVN	14	IP_830575
EAIVFKTSRFQ	11	IP_836824
KGRSLKAG	8	IP_838839
TEGAIDDSLIGGNASAEGLEGEGTESTVVTGVDIVMNHHL	40	IP_840135
IIYWDLISHDELFSDIYKIREI	22	IP_840135
IIYWDLISHDELFSDIYKI	19	IP_840135
AQATGKPAQYIAVHVVPDQLMTF	23	IP_840413
AQATGKPAQYIAVHVVPDQL	20	IP_840413
HISPDRVYINYYDMNAANVGWNSSTFA	27	IP_840413
TQQLAQATGKPAQYIAVHVVPDQL	24	IP_840413
HSIGKIGGAQNRNYSK	16	IP_840413
AQATGKPAQYIAVH	14	IP_840413
AQATGKPAQYIAVHVVPDQLMT	22	IP_840413
TQQLAQATGKPAQYIAVHVVPDQLMTF	27	IP_840413
HISPDRVYINYY	12	IP_840413
AQATGKPAQYIAVHVV	16	IP_840413
SLHSIGKIGGAQNRNYSKL	19	IP_840413
HSIGKIGGAQNRNYSKL	17	IP_840413
TQQLAQATGKPAQYIAV	17	IP_840413
AQATGKPAQYIAVHV	15	IP_840413
TGKPAQYIAVHVVPDQLMTF	20	IP_840413
HSIGKIGGAQNR	12	IP_840413
RLHISPDRV	9	IP_840413
HISPDRVYI	9	IP_840413
AQATGKPAQYIAVHVVPDQLMTFSGTNDPCTL	32	IP_840413
TGKPAQYIAVHVVPDQL	17	IP_840413
HSIGKIGGAQNRNY	14	IP_840413
KPLFLSLLLSVSLSGPPGPN	20	IP_851957
KPLEPAALISWLWGSSLGLSL	21	IP_854375
TPVRCASWSLKDF	13	IP_855484
PPKKQAQVGGSKKAEQKKKEKI	22	IP_856101
PPKKQAQVGGSKKAEQKKKEK	21	IP_856101
NELFKPVVA	9	IP_856101
RAKGKPDAGKKVVKAEKSKKKKEEEDDEE	29	IP_856976
AGFRRKGHAVGDIPGVRFKVVKVANVSL	28	IP_857049
LALYKGKKERPRS	13	IP_857049
YKGKKERPRS	10	IP_857049
GFRRKGHAVGDIPGVRFKVVKVANVSL	27	IP_857049
KAHLGTALKANPFGGASHAK	20	IP_857049
YDNEYGYSNRVVDLMAYMASRE	22	IP_857373
HRVIATL	7	IP_858912
AAAATTAAEAEAAEAAEAEAEAEAQGGAPRAQ	32	IP_862312
DVKKKNENPLKGR	13	IP_862908
RYKGEMKTYIPPPKGETKKKFKDPNAPKRPPSA	33	IP_869206
MGSKMASATRVVQVVKPHAPLIKFPNR	27	IP_870689
SATRVVQVVKPHAPLIKFPNR	21	IP_870689
GSKMASATRVVQVVKPHAPLIKFPNR	26	IP_870689
MGSKMASATRVVQVVKPHAPLIK	23	IP_870689
MGSKMASATRVVQVVKPHAPLIKFPNRRD	29	IP_870689
GSKMASATRVVQVVKPHAPLIK	22	IP_870689
SKGSTSPDLLMHQGPPDTAEIIKSLPQKYR	30	IP_870689
SATRVVQVVKPH	12	IP_870689
MGSKMASATRVVQVVKPHAPLIKFPN	26	IP_870689
GPPDTAEIIKSLPQKYR	17	IP_870689
GSKMASATRVVQVVKPH	17	IP_870689
SATRVVQVVKPHAPLIKFPN	20	IP_870689
GSKMASATRVVQVVKPHAPLIKFPNRRD	28	IP_870689
GSKMASATRVVQVVKPHAPLIKFPN	25	IP_870689
ATRVVQVVKPH	11	IP_870689
ASATRVVQVVKPH	13	IP_870689
KGSTSPDLLMHQ	12	IP_870689
TRVVQVVKPH	10	IP_870689
SKGSTSPDLLMH	12	IP_870689
KGSTSPDLLMH	11	IP_870689
SKGSTSPDLLMHQGPPDTAEIIKSLPQKYRRKPMS	35	IP_870689
SKGSTSPDLLMHQGPPDTAEIIKSLPQKYRRKPMSQEEME	40	IP_870689
APLIKFPNR	9	IP_870689
SAISQHSKGSTSPDLLMH	18	IP_870689
SATRVVQVVKPHAPLIKFPNRRDKRKL	27	IP_870689
SATRVVQVVKP	11	IP_870689
SSAISQHSKGS	11	IP_870689
APLIKFPNRRD	11	IP_870689
SPDLLMH	7	IP_870689
GSAALPSHS	9	IP_870689
SATRVVQVVKPHAPLIKF	18	IP_870689
ERYKIGKNKWFFQKLRF	17	IP_870782
GKGDPKKPRSKMSSYAFFVQ	20	IP_871073
GKGDPKKPRSKMSSYAFFVQTC	22	IP_871073
GRGGYGGRGGGSRGSYGGGDGGYN	24	IP_872893
IRREDTLMEYLENPKKYIPGTK	22	IP_873222
YLKKATNE	8	IP_873222
LKKATNE	7	IP_873222
GKIIGKRGIVGYDV	14	IP_873734
YGPMKGGSFGGRSSGSPYGGGYGSGGGRGGYGSRK	35	IP_874591
PMFIVNTNVPHASVPEGFLSELTQQLAQATGKPAQY	36	IP_874906
PMFIVNTNVPHASVPEGFLSELTQQLAQATGKPAQYIAVHVVPDQL	46	IP_874906
PMFIVNTNVPHASVPEGFLSELTQQLAQA	29	IP_874906
PMFIVNTNVPHASVPEGFLSELTQQ	25	IP_874906
SGKKLEDGPKF	11	IP_875634
AVGVIKAVDKKVVGAGKVTKFA	22	IP_875634
DMRRTVAVGVIKAVDK	16	IP_875634
SGKKLEDGPKFLK	13	IP_875634
DMRRTVAVGVIKAVDKK	17	IP_875634
KTEWLDGKHVVFGKVKEGMNIVQVERFGSRNGKTSKKITISDCGQL	46	IP_875659
AKTEWLDGKHVVFGKVKEGMNIVQV	25	IP_875659
GVDFTRHNGTGSRSIYGEKFEDENFILKHTGPGILSM	37	IP_875659
GKVKEGMNIVQVERFGSRNGKTSKKITISDCGQL	34	IP_875659
KTEWLDGKHVVFGKVKEGMNIVQVERFGSRNGKTSKKITISDCGQ	45	IP_875659
VERFGSRNGKTSKKITI	17	IP_875659
AKTEWLDGKHVVFGKVKEGMNIVQVERFGSRNGKTSKKITISDCGQ	46	IP_875659
AKTEWLDGKHVVFGKVKEGMNIVQVERF	28	IP_875659
KTEWLDGKHVVFGKVKEGMNIVQVERF	27	IP_875659
KTEWLDGKHVVFGKVKEGMNIVQV	24	IP_875659
AKTEWLDGKHVVFGKVKEGMNIVQVERFG	29	IP_875659
GEGGSSDKAAGDETGAKVERADGYEPPVQESV	32	IP_875702
VPKIYIILMRPERNSTQKIKERNSTQKIKEKSYF	34	IP_876129
KYPVEHGIVTNWDDMEKIWHHTFY	24	IP_879390
VGGKLKFLF	9	IP_883139
PKRPSPA	7	IP_888872
PTALRPAP	8	IP_891155
KQLPKSSPRSGPFGVTRKK	19	IP_895975
MAGRKLALKTIDWVSFVEIMPPN	23	IP_897862
RLASLSEKPPAIDWAFYRA	19	IP_897862
ADSLLCLPTSNNEEGIIL	18	IP_898701
MQIFVKTLTGKTITLEVEPSDTIGNVKAKIQDKEGIPPD	39	IP_899761
MQIFVKTLTGKTITLEVEPSDTIGNVKAKIQDKEGIPP	38	IP_899761
MQIFVKTLTGKTITLEVEPSDTIGNV	26	IP_899761
MQIFVKTLTGKTITLEVEPSDTIGNVKAKIQDKEGIPPDQQRLIFAGKQLEDGRTLSDYNIQKESTLHLVLRLR	74	IP_899761
MQIFVKTLTGKTITLEVEPSDTIGNVKAKIQDKEGIP	37	IP_899761
YCFNKPEDK	9	IP_899761
MQIFVKTLTGKTITLEVEPSDTIGNVKAKIQDKEGIPPDQQRLIFAGKQLEDGRTLSDYNIQKESTLHLVLRLRG	75	IP_899761
MQIFVKTLTGKTITLEVEPSDTIGNVKAKIQDKEGIPPDQQRLIFAGKQLEDGRTLSDYNIQKESTLHLVLRLRGG	76	IP_899761
MQIFVKTLTGKTITLEVEPSDTIGNVKAKIQDKEGIPPDQQRLIFAGKQLEDGRTLSDYNIQKESTLHLVLRLRGGA	77	IP_899761
MQIFVKTLTGKTITLEVEPSDTIGNVKAKIQDKEGIPPDQQRLIFAGKQLEDGRTLSDYNIQKESTLHLVLRL	73	IP_899761
MQIFVKTLTGKTITLEVEPSDTIGNVKAKIQDKEGIPPDQQRLIFAGKQLEDGRTLSDYNIQKESTLHLVLR	72	IP_899761
MGSHFDRH	8	IP_899761
CFNKPEDK	8	IP_899761
MQIFVKTLTGKTITLEVEPSDTIGNVKAKIQDKEG	35	IP_899761
TPELQRIKKIQDQISNIKYH	20	IP_899901
NNTAADDKQPYEKAAKLKEKYEKDIAA	27	IP_900041
NNTAADDKQPYEKAAKLKEKYEKDIAAY	28	IP_900041
PILCHNLHDF	10	IP_900204
KGGGNFGGGNYGDGGNYNDFGNYSGQQQSNYGPMKGGSFGGR	42	IP_901156
KGGGNFGGGNYGDGGNYNDFGNYSGQQQSNYGPMKGGSFGGRSSGSPYGDGYGSGGGSGRYGSR	64	IP_901156
TADDEPLGRVSVELFADKVPKTAENFRAL	29	IP_901756
FDITADDEPLGRVSVELFADKVPKTAENF	29	IP_901756
FADKVPKTAENFRALSTGEKGFGYPFTE	28	IP_901756
YLAQNYEMPNLAKKLEEIKKDLEAKKKPPSS	31	IP_903208
FTLGNVVGMYLAQNYEMPNLAKKLEEIKKDLEAKKKPPSS	40	IP_903208
LAQNYEMPNLAKKLEEIKKDLEAKKKPPSS	30	IP_903208
YEMPNLAKKLEEIKKDLEAKKKPPSS	26	IP_903208
LAQNYEMPNLAKKLEEIKKDLEAKKKPPS	29	IP_903208
AQNYEMPNLAKKLEEIKKDLEAKKKPPSS	29	IP_903208
FLLGFTLGNVVG	12	IP_903208
YLAQNYEMPNLAKKLEEIKKDLEAKKKPPS	30	IP_903208
MYLAQNYEMPNLAKKLEEIKKDLEAKKKPPSS	32	IP_903208
IARLEKAKAKELATKLG	17	IP_903223
KAKAKELATKLG	12	IP_903223
KKGKFEDMAKADK	13	IP_903566
CSEYRPKIKGGHPGLSIGDVAKKLGEM	27	IP_904027
YRPKIKGGHPGLSIGDVAKKLGEM	24	IP_904027
VPSGLLCAIVAGATLTKPCVP	21	IP_907494
EAGSSGQNRKRRGKHR	16	IP_916780
CSEYRPQIKGEHPGLSIGDVAKKLGEM	27	IP_918976
GRSAVAASSKWLDGFRKWYYNA	22	IP_919041
GRSAVAASSKWLDGFRKWY	19	IP_919041
GRSAVAASSKWLDGFRKW	18	IP_919041
GRSAVAASSKWLDGFRKWYYN	21	IP_919041
AGRSAVAASSKWLDGFRKWYYNA	23	IP_919041
SSKWLDGFRKWYYNA	15	IP_919041
ALRYPMAVGLNKGHKVTNK	19	IP_919052
ALRYPMAVGLNKGHKVTN	18	IP_919052
KVTPQDLPDPHGLALSGAVISLSFFLFPGLRASWGP	36	IP_920387
CCKASSIPQAVCHWLCSVLSRAGVFALC	28	IP_920557
PGVTVKDVNQQFLRALAAFLK	21	IP_922194
PGVTVKDVNQQFLRAL	16	IP_922194
PGVTVKDVNQQFLRALAAF	19	IP_922194
VPPTSVSVVTSPS	13	IP_922541
KTHINIVLFEHVDSGKSTTTGHLIYK	26	IP_923329
KTHINIVLFEHVDSGKSTTTGHL	23	IP_923329
GAFWVQEGKTSKKITI	16	IP_924055
EDENFILKHTGPGTLSML	18	IP_924640
KKKWSKGKVR	10	IP_926262
KKKWSKGKV	9	IP_926262
KAKKKWSKGKVR	12	IP_926262
NDFGNYSGQQQSNYGPMKGGQFW	23	IP_926854
DQPGKKKKKER	11	IP_931694
KTEVSEGIVPSNLVLGHHL	19	IP_937792
LITLPQWVISLPKFFYVG	18	IP_940459
FAKRDKKKKER	11	IP_947701
AMKEMGTPDVLIDTRLNKAVWAKGIRNVPY	30	IP_948009
EGRDPKEPEQLRKLFIGGLSF	21	IP_948039
GKTSKKITISDCGQL	15	IP_948478
GKTSKKITISD	11	IP_948478
MNIAEAMERFASRNGKTSKKITISDCGQL	29	IP_948478
GKTSKKITISDCGQ	14	IP_948478
SRNGKTSKKITISDCGQL	18	IP_948478
KIGQCVLGHHL	11	IP_948674
MQIFVKTLTGKTITLEVEPSDTIENVKAKTQDKEGLPPDQQRLIFAGKQLEDGRTLSDYNIQRESTLHLVLSLL	74	IP_948852
MQIFVKTLTGKTITLEVEPSDTIENVKAKTQDKEGLPPDQQRLIFAGKQLEDGRTLSDYNIQRESTLHLVLSLLGGAKKR	80	IP_948852
MQIFVKTLTGKTITLEVEPSDTIENVKAKTQDKEGLPPDQQRLIFAGKQLEDGRTLSDYNIQRESTLHLVLSLLGGAK	78	IP_948852
MQIFVKTLTGKTITLEVEPSDTIENVKAKTQDKEGLPPDQQRLIFAGKQLEDGRTLSDYNIQRESTLHLVLSLLG	75	IP_948852
MQIFVKTLTGKTITLEVEPSDTIENVKAKTQDKEGLPPDQQRLIFAGKQLEDGRTLSDYNIQRESTLHLVLSLLGGA	77	IP_948852
KVDENGKISRLR	12	IP_948852
YKVDENGKISR	11	IP_948852
YKVDENGKISRL	12	IP_948852
KVDENGKISRL	11	IP_948852
YKVDENGKISRLR	13	IP_948852
KYYKVDENGKISR	13	IP_948852
AKKRKKKSYTTPKKNKHKRKKVK	23	IP_948852
MQIFVKTLTGKTITLEVEPSDTIENVKAKTQDKEGLP	37	IP_948852
SGVLDVLQMKEEDVLKFLAAGTHL	24	IP_949310
PRGSRSRTSRVTPPVSRAPQMRAAPQRAPAAQPPAAAATSAVGSPAAAPRQPGLMAQ	57	IP_950192
AGAAPAATGGTGRVRLLRLCSTVAHR	26	IP_954205
LGDVRPHQ	8	IP_954346
LWLSHSLRSMFYIL	14	IP_958609
LLPPSSSGASVLLNAF	16	IP_959231
AAPPRDAPATAGAAGRAAAGRTR	23	IP_959655
RDDGRLQETGWTRR	14	IP_961256
PVSWVSLGNLLDSCTSSPIPTF	22	IP_966175
PSKLIDAYLILKHAT	15	IP_966350
GSRLGLLPEY	10	IP_967161
ASLFAGIFPARGLPSSLPLF	20	IP_967703
FTRLQLAVYQPLPSLPLF	18	IP_968042
FSFSKKCSERWKTMSAKEK	19	IP_969849
HSIGKIGGAQNRNYSKLLCGLLADRL	26	IP_970184
NAERNAELKGLDVDSL	16	IP_970973
NEFGYSNRVVDLMAYMASKE	20	IP_971196
ISWYNNEFGYSNRVVDLMAYMASKE	25	IP_971196
KQTDKQKNK	9	IP_971403
AKKGGEKKGRSAINEVVTREY	21	IP_972261
PRKGKKEKKEEQVISLGPQVAEGENVFGVCHIF	33	IP_972476
GKKEKKEEQVISLGPQVAEGENVFGVCHIF	30	IP_972476
DMKKVVKQASEGPLKGILG	19	IP_972567
MCVKSKLQSLLTLDLLKKNICNLF	24	IP_972842
RNESLFLNDTI	11	IP_976930
APAAPAAPLPLRPLPRPPWALSWTR	25	IP_979125
VAAPAAPAAPLPLRPLPRPPWALSWTR	27	IP_979125
MGRAPTRAVAAPAAPAAPLPLRPLPRPPWALSWTR	35	IP_979125
APTRAVAAPAAPAAPLPLRPLPRPPWALSWTR	32	IP_979125
AAPAAPAAPLPLRPLPRPPWALSWTR	26	IP_979125
PTRAVAAPAAPAAPLPLRPLPRPPWALSWTR	31	IP_979125
AAPAAPLPLRPLPRPPWALSWTR	23	IP_979125
RAVAAPAAPAAPLPLRPLPRPPWALSWTR	29	IP_979125
GRAPTRAVAAPAAPAAPLPLRPLPRPPWALSWTR	34	IP_979125
TRAVAAPAAPAAPLPLRPLPRPPWALSWTR	30	IP_979125
RQSTGQKNQGSSQDNVF	17	IP_981552
KMMLELSGVWFGLVLTLF	18	IP_985123
RWHIFKLYLETITAQ	15	IP_986572
IFAGIKKGERADL	13	IP_988741
LENPKKYIPGTKMIFAGIKKGERAD	25	IP_988741
IVLTTSAGIMDHEEARRKHRGGKILGFF	28	IP_988812
TTMEKAGAHLKGRAKR	16	IP_988848
SNRVVDFMAYMASKE	15	IP_988848
MQIFVKTLTGKTITLEVEPWDTIENVKVKTQDKEGIPPDQQRLIFAGKPPEDGRTLSDYNIQKESTLHLVLR	72	IP_989003
MQIFVKTLTGKTITLEVEPWDT	22	IP_989003
MQIFVKTLTGKTITLEVEPWDTIENVKVKTQDKEGI	36	IP_989003
MQIFVKTLTGKTITLEVEPWDTIENVKVKTQDKEGIPP	38	IP_989003
MQIFVKTLTGKTITLEVEPWDTIEN	25	IP_989003
MQIFVKTLTGKTITLEVEPWDTIENVKVKTQDKEGIPPDQQRLIFAGKPPEDGRTLSDYNIQKESTLHLVLRLWG	75	IP_989003
MQIFVKTLTGKTITLEVEPWDTIENVKVKTQDKEGIPPDQQRLIFAGKPPEDGRTLSDYNIQKESTLHLVLRL	73	IP_989003
NPTVFFDITANDEPLGRVSFELF	23	IP_989339
FDITANDEPLGRVSFEL	17	IP_989339
PTVFFDITANDEPLGRVSFEL	21	IP_989339
VNPTVFFDITANDEPLGRVSFELFADKVPKTAENFRAL	38	IP_989339
IAEAIERFGSRNGKTSKKITISDCGQL	27	IP_989340
KGKKEAPAPPKEAKA	15	IP_990136
KEAPAPPKEAKAKA	14	IP_990136
QGGDFTRHNGTGGRSIYGEKSEDENFILKHTGPGILSM	38	IP_990260
HNGTGGRSIYGEKSEDENFILKHTGPGILSM	31	IP_990260
EDENFILKHTGPGILSMANAGPNTNGSQFFLSA	33	IP_990260
PKRKAEGDAKGDKTKVKDKPQ	21	IP_990343
PKRKAEGDAKGDKTKVKDKPQRR	23	IP_990343
PKRKAEGDAKGDKTKVKDKPQRRSARL	27	IP_990343
PKRKAEGDAKGDKTKVKDKPQRRS	24	IP_990343
FHVSITRVSVVDL	13	IP_990344
IKSAGVSVEPFWPGLFAKAL	20	IP_990449
HTVKSTLMRLHFMKY	15	IP_990549
VPRTNVL	7	IP_990635
ELFADKVPKTAENFRAL	17	IP_990711
FADKVPKTAENFRAL	15	IP_990711
PKTAENFRAL	10	IP_990711
ADKVPKTAENFRALST	16	IP_990711
ADKVPKTAENFRAL	14	IP_990711
ADKVPKTAENFRA	13	IP_990711
KHTGPGILSM	10	IP_990711
FELFADKVPKTAENF	15	IP_990711
ILKHTGPGILSM	12	IP_990711
DKVPKTAENFRAL	13	IP_990711
ELFADKVPKTAENFR	15	IP_990711
EKFEDDNFILKHTGPGILSM	20	IP_990711
ADKVPKTAENFR	12	IP_990711
KTAENFRAL	9	IP_990711
FILKHTGPGILSM	13	IP_990711
ELFADKVPKTAENF	14	IP_990711
DKVPKTAENFR	11	IP_990711
ELFADKVPKTAEN	13	IP_990711
ADKVPKTAENF	11	IP_990711
DKVPKTAENFRA	12	IP_990711
TGPGILSMAN	10	IP_990711
TGPGILSMA	9	IP_990711
KHTGPGILSMA	11	IP_990711
ELFADKVPKTA	11	IP_990711
FADKVPKTAENFR	13	IP_990711
TGPGILSMANAGLNTNGSQFFICTA	25	IP_990711
KVPKTAENFRAL	12	IP_990711
ISFELFADKVPKTAENFRALSTGGVGYKGSSFHRIIPGFTCQGGDFTRNNGTGSRSIYGEKFEDDNFILKHTGPGILSM	79	IP_990711
KHTGPGIL	8	IP_990711
DARALMLQCVDLLADAVAVTMGPKG	25	IP_990758
DVYKIGGIGTVPVGRVETSVLKPGMVVTF	29	IP_991364
AELIQKKLQGEVEK	14	IP_991787
AELIQKKLQGEVEKY	15	IP_991787
KEELALLDGSKVVFKLLGPVL	21	IP_991787
LMLDLQKLS	9	IP_994236
KPTKRGK	7	IP_998609
SMLEDPWAGLEPVSVVDISQQYSNTQTFTDKK	32	J3QQ10
GFGDLKTPAGLQVLNDYLADKSYIEGKGQ	29	M0QWK5
GQYFAKPQNQGGYGGSSSSSSYGSGR	26	NP_001159443.1
YFAKPQNQGGYGGSSSSSSYGSGR	24	NP_001159443.1
RGRPKKLKEEEEGISQESSEEEQ	23	NP_001160015.1
AKKGGEKKKGRSAINKVVTR	20	NP_001245387.1
AKKGGEKKKGRSAINKVVTREY	22	NP_001245387.1
PTNPRALPFLL	11	NP_001245387.1
MLGRLPLPQLLF	12	NP_001295354.1
IYQPIFEQYSRDQKELKEKVKLLEESEEKGANSA	34	NP_001295354.1
PLYVTKVMSKSAAEVIAQARKK	22	O08553
SAKTSPAKQQAPPVRNLHQSGFSLSGAQIDDNIPR	35	O08553
SAKTSPAKQQAPPVRNLHQSGFSLSGAQIDDNIPRRTTQ	39	O08553
SAKTSPAKQQAPPVRNLHQSG	21	O08553
HSRMVIPGGIDVHTRF	16	O08553
SAKTSPAKQQAPPVRNLH	18	O08553
SAKTSPAKQQAPPVRN	16	O08553
SGAQIDDNIPRRTTQRIVAPPGGRANITSLG	31	O08553
SAKTSPAKQQAPPVRNLHQSGF	22	O08553
RFQMPDQGMTSADDFFQGTKA	21	O08553
VTPASSAKTSPAKQQAPPVR	20	O08553
SYQGKKNIPRITSDRLLIKGGKIVNDDQSFY	31	O08553
SYQGKKNIPRITSDRL	16	O08553
LHQSGFSLSGAQIDDNIPRRTTQRIVAPPGGRANITSLG	39	O08553
SAKTSPAKQQAPPVRNL	17	O08553
SRMVIPGGIDVHTRF	15	O08553
SYQGKKNIPRITSDRLLIKGGKIVN	25	O08553
TSPAKQQAPPVR	12	O08553
PLYVTKVMSKSAAEVIAQARKKGTVVYGEPITA	33	O08553
SGFSLSGAQIDDNIPRRTTQRIVAPPGGRANITSLG	36	O08553
SYQGKKNIPRITSDRLLIKGGKIVNDDQSF	30	O08553
NIPRRTTQRIVAPPGGRANITSLG	24	O08553
RTTQRIVAPPGGRAN	15	O08553
SYQGKKNIPRITSDRLLIKG	20	O08553
TRFQMPDQGMTSADDFFQGTKA	22	O08553
SAKTSPAKQQAPPVRNLHQSGFSL	24	O08553
IPRRTTQRIVAPPGGRANITSLG	23	O08553
HSRMVIPGGIDVHTRFQ	17	O08553
IPRRTTQRIVAPPGGRAN	18	O08553
SYQGKKNIPRITSDRLLIK	19	O08553
SAKTSPAKQQAPPVRNLHQSGFSLSGAQIDDNIPRRTTQRIVAPPGGRANITSLG	55	O08553
SVTPKTVTPASSAKTSPAKQQAPPVRNLHQSGF	33	O08553
DIYMEDGLIKQIGENLIVPGGVKTIEA	27	O08553
KVMSKSAAEVIAQARKKGTVVYGEPITA	28	O08553
IPRRTTQRIVAPPGGRANITS	21	O08553
RTTQRIVAPPGGR	13	O08553
SAKTSPAKQQAPPVRNLHQSGFSLSG	26	O08553
RIVAPPGGRANITS	14	O08553
RIVAPPGGRANITSLG	16	O08553
HQSGFSLSGAQIDDNIPR	18	O08553
NTAQKAVGKDNF	12	O08553
TSPAKQQAPPVRNLHQSG	18	O08553
TSPAKQQAPPVRNLH	15	O08553
SAKTSPAKQQAPPVRNLHQ	19	O08553
SAKTSPAKQQAPPVR	15	O08553
SYQGKKNIPRITS	13	O08553
SAAEVIAQARKK	12	O08553
DNIPRRTTQRIVAPPGGRANITSLG	25	O08553
SGAQIDDNIPRRT	13	O08553
APPVRNLHQSGFSLSGAQIDDNIPRRTTQRIVAPPGGRANITSLG	45	O08553
TSPAKQQAPPVRNLHQSGFSLSGAQIDDNIPRRTTQRIVAPPGGRANITSLG	52	O08553
NLHQSGFSLSGAQIDDNIPRRTTQRIVAPPGGRANITSLG	40	O08553
RTTQRIVAPPGGRANITSLG	20	O08553
SLSGAQIDDNIPRRTTQRIVAPPGGRANITSLG	33	O08553
SYQGKKNIPRITSDRLLIKGGKIVNDDQSFYADIYMEDGLIKQIGENLIVPGGVKTIEAH	60	O08553
QQAPPVRNLHQSGFSLSGAQIDDNIPRRTTQRIVAPPGGRANITSLG	47	O08553
SGAQIDDNIPRRTTQ	15	O08553
SGAQIDDNIPRRTTQR	16	O08553
QQAPPVRNLHQSG	13	O08553
APPGGRANITSLG	13	O08553
TTQRIVAPPGGR	12	O08553
TSPAKQQAPPVRN	13	O08553
TFNTAQKAVGKDNF	14	O08553
TTQRIVAPPGGRANITSLG	19	O08553
SKSAAEVIAQARKK	14	O08553
SYQGKKNIPRITSDRLLIKGG	21	O08553
SYQGKKNIPRITSDRLLIKGGKIVNDDQSFYADIYMEDGLIKQIGENLIVPGGVKTIEA	59	O08553
TSPAKQQAPPVRNLHQSGFSLSGAQIDDNIPR	32	O08553
AFKDRFQLTDSQIYEVL	17	O08553
SYQGKKNIPRIT	12	O08553
QMPDQGMTSADDFFQGTKA	19	O08553
GAQIDDNIPRRTT	13	O08553
SLSGAQIDDNIPRRTTQ	17	O08553
TTQRIVAPPGGRANITS	17	O08553
SLSGAQIDDNIPRRTTQR	18	O08553
IPGGIDVHTRF	11	O08553
GTVVYGEPITA	11	O08553
AQIDDNIPRRTTQR	14	O08553
SYQGKKNIPR	10	O08553
IDDNIPRRTTQ	11	O08553
IDDNIPRRT	9	O08553
MSYQGKKNIPRITSDRL	17	O08553
QSGFSLSGAQIDDNIPRRTTQRIVAPPGGRANITSLG	37	O08553
RDIGAIAQVH	10	O08553
QIDDNIPRRTTQ	12	O08553
SGAQIDDNIPRRTT	14	O08553
AQIDDNIPRRTT	12	O08553
IDDNIPRRTT	10	O08553
SGFSLSGAQIDDNIPRRTTQ	20	O08553
AQIDDNIPRRTTQ	13	O08553
FSLSGAQIDDNIPRRTTQRIVAPPGGRANITSLG	34	O08553
PRRTTQRIVAPPGGRANITSLG	22	O08553
SPAKQQAPPVRN	12	O08553
LSGAQIDDNIPRRTTQ	16	O08553
SAKTSPAKQQAPP	13	O08553
HQSGFSLSGAQIDDNIPRRTTQRIVAPPGGRANITSLG	38	O08553
APPVRNLHQSGFSLSGAQIDDNIPR	25	O08553
MSYQGKKNIPRITS	14	O08553
QIDDNIPRR	9	O08553
TTQRIVAPP	9	O08553
RTTQRIVAPPGGRANITS	18	O08553
GAQIDDNIPRRTTQRIVAPPGGRANITSLG	30	O08553
PPGGRANITSLG	12	O08553
AKTSPAKQQAPPVRNL	16	O08553
SGAQIDDNIPRR	12	O08553
SGAQIDDNIPR	11	O08553
FAEFGTLKKAAVHYDR	16	O08583
NRPAIARGAAGGGRN	15	O08583
RAGSQGGRGGAVQAAAR	17	O08583
AGSQGGRGGAVQAAAR	16	O08583
AIARGAAGGGRN	12	O08583
SRPKQLPDK	9	O08583
ADKMDMSLDDIIKLN	15	O08583
ADKMDMSLDDIIKLNR	16	O08583
MADKMDMSLDDIIKLNR	17	O08583
SGRSLGTADVHFER	14	O08583
AEFGTLKKAAVHYDR	15	O08583
SGRSLGTADVHFERKADALKAMKQ	24	O08583
MADKMDMSLDDIIKLN	16	O08583
GTLKKAAVHYDR	12	O08583
SRPKQLPDKWQHDL	14	O08583
RSLGTADVHFER	12	O08583
RPAPYSRPKQLPDKWQHDL	19	O08583
AEFGTLKKAAVHYDRSGR	18	O08583
KADALKAMKQ	10	O08583
NRPAPYSRPKQLPDK	15	O08583
RPAPYSRPKQLPDK	14	O08583
ADKMDMSLDDIIKL	14	O08583
MDMSLDDIIKLNR	13	O08583
FGTLKKAAVHYDR	13	O08583
SLGTADVHFER	11	O08583
KADALKAMKQYNGVPLDGRPMNIQLV	26	O08583
NLDFGVSDADIQEL	14	O08583
APYSRPKQLPDK	12	O08583
AEFGTLKKAAVHY	13	O08583
AEFGTLKKAAVH	12	O08583
GTLKKAAVHYDRSGR	15	O08583
SRPKQLPDKWQHD	13	O08583
KAAVHYDRSGRSLGTADVHFER	22	O08583
NRPAPYSRPK	10	O08583
AEFGTLKKAAVHYDRSGRSLGTADVHFER	29	O08583
FAEFGTLKKAAVHY	14	O08583
SGRSLGTADVH	11	O08583
KAAVHYDR	8	O08583
AEFGTLKKAAVHYDRSGRSLGTADVHFERKADALKAMKQ	39	O08583
SGRSLGTADVHFERKADALKAMKQYNGVPLDGRPMNIQLV	40	O08583
DRSGRSLGTADVHFER	16	O08583
KADALKAMKQYNGVPL	16	O08583
KADALKAMKQYNGVPLDGRPMNIQL	25	O08583
SQGGRGGAVQAAAR	14	O08583
DSGFGGGAGVETGGKLLVSNLDFGVSDADIQELF	34	O08583
VHYDRSGRSLGTADVHFER	19	O08583
NRPAIARGAAGGGRNRPAPYSRPK	24	O08583
GRPMNIQLVTSQIDTQR	17	O08583
ADKMDMSLDDIIKLNRS	17	O08583
FAEFGTLKKAAVH	13	O08583
GRPMNIQLVTSQID	14	O08583
SRPKQLPDKWQ	11	O08583
RVNRGGGPMR	10	O08583
MADKMDMSLDDIIKLLVSNLD	21	O08583-2
FVPNILARAGNLKAITAGSK	20	O08600
YKGRLSKAGAEPAPERQAESSQVKQ	25	O08677-2
EYKGRLSKAGAEPAPERQAESSQVKQ	26	O08677-2
KAGAEPAPERQAESSQVKQ	19	O08677-2
AGAEPAPERQAESSQVKQ	18	O08677-2
AEPAPERQAESSQVKQ	16	O08677-2
APERQAESSQVKQ	13	O08677-2
KGRLSKAGAEPAPERQAESSQVKQ	24	O08677-2
SVTVQETKEGRTR	13	O08677-2
GAEPAPERQAESSQVKQ	17	O08677-2
ADTDGMVKILGHKSTDRVLGAHILGPGAGEMVNE	34	O08749
ADTDGMVKILGHKSTDRVLG	20	O08749
TLSEAFREANLAAAFGKPINF	21	O08749
SEAFREANLAAAFGKPIN	18	O08749
REANLAAAFGKPINF	15	O08749
ADTDGMVKILGHKSTDR	17	O08749
AHPTLSEAFREANLAAAFGKPIN	23	O08749
HKSTDRVLGAHILGPGAGEMVNE	23	O08749
FREANLAAAFGKPIN	15	O08749
ADTDGMVKILGHKSTDRVLGAHILGPGAGE	30	O08749
YGASCEDIARVCH	13	O08749
ADTDGMVKILGH	12	O08749
AHPTLSEAFREANLAAAFGKPINF	24	O08749
STDRVLGAHILGPGAGEMVNE	21	O08749
AHPTLSEAFREANLAAAFGKP	21	O08749
LEYGASCEDIARVCH	15	O08749
TDGMVKILGH	10	O08749
HAHPTLSEAFREANLAAAFGKPIN	24	O08749
TLSEAFREANLAAAFGKP	18	O08749
KSTDRVLGAHILGPGAGEMVNE	22	O08749
REANLAAAFGKPIN	14	O08749
FREANLAAAFGKPINF	16	O08749
EAFREANLAAAFGKPIN	17	O08749
DIARVCHAHPTLSEAFREANLAAAFGKPIN	30	O08749
KSTDRVLGAHILGPGAGE	18	O08749
SEAFREANLAAAFGKP	16	O08749
EANLAAAFGKPINF	14	O08749
GASCEDIARVCH	12	O08749
ADTDGMVKILGHKSTDRVL	19	O08749
HPTLSEAFREANLAAAFGKPINF	23	O08749
HAHPTLSEAFREANLAAAFGKPINF	25	O08749
VCHAHPTLSEAFREANLAAAFGKPINF	27	O08749
DTDGMVKILGH	11	O08749
STDRVLGAHIL	11	O08749
LAAAFGKPINF	11	O08749
CHAHPTLSEAFREANLAAAFGKPINF	26	O08749
TDGMVKILGHKSTDRVLG	18	O08749
ADTDGMVKILGHKSTDRVLGA	21	O08749
SRAKTNADTDGMVKILGHKSTDRVLG	26	O08749
ADTDGMVKILGHKSTDRV	18	O08749
DTDGMVKILGHKSTDRVLG	19	O08749
SRAKTNADTDGMVKILGH	18	O08749
HPTLSEAFREANLAAAFGKPIN	22	O08749
SEAFREANLAAAFGKPINF	19	O08749
EAFREANLAAAFGKPINF	18	O08749
DTDGMVKILGHKSTDR	16	O08749
ADTDGMVKILGHKSTD	16	O08749
HPTLSEAFREAN	12	O08749
SRAKTNADTDGMVK	14	O08749
ILGHKSTDRVLG	12	O08749
HPTLSEAFREANLAAAFG	18	O08749
PTLSEAFREANL	12	O08749
ILGHKSTDRV	10	O08749
HPTLSEAFREANLAAA	16	O08749
ADTDGMVKILGHKS	14	O08749
ALEYGASCEDIARVCH	16	O08749
HPTLSEAFREANLAA	15	O08749
LGHKSTDR	8	O08749
GHKSTDRVLG	10	O08749
PTLSEAFREANLAAAFGKPINF	22	O08749
TDGMVKILGHKSTDRV	16	O08749
STDRVLGA	8	O08749
SEAFREANLAAA	12	O08749
LGPGAGEMVNE	11	O08749
HPTLSEAFREANL	13	O08749
LATLNKTGKAVSYLGPK	17	O08997
PKHEFSVDMTCEGCAEAVSRVLNKLGGVEF	30	O08997
ATLNKTGKAVSYLGPK	16	O08997
NKTGKAVSYLGPK	13	O08997
KTGKAVSYLGPK	12	O08997
TLNKTGKAVSYLGPK	15	O08997
AEAVSRVLNKLGGVEF	16	O08997
IDSEHSSDTLLATLNKTGKAVSYLGPK	27	O08997
PKHEFSVDMTCEGCAEAVSRVLNKLGGVEFNIDLPNKKVCIDSEHSSDTLLATLNKTGKAVSYLGPK	67	O08997
NIDLPNKKVCIDSEHSSDTLLATLNKTGKAVSYLGPK	37	O08997
ATLNKTGKAVSYLG	14	O08997
TLLATLNKTGKAVSYLGPK	19	O08997
LATLNKTGKAVSYLG	15	O08997
TGKAVSYLGPK	11	O08997
GGVEFNIDLPNKKVCIDSEHSSDTLLATLNKTGKAVSYLGPK	42	O08997
IDSEHSSDTLLATLNKTGKAVSY	23	O08997
ATLNKTGKAVSY	12	O08997
ATLNKTGKAVS	11	O08997
DLPNKKVCIDSEHSSDTLLATLNKTGKAVSYLGPK	35	O08997
LATLNKTGKAVSYLGP	16	O08997
SEHSSDTLLATLNKTGKAVSYLGPK	25	O08997
IDLPNKKVCIDSEHSSDTLLATLNKTGKAVSYLGPK	36	O08997
SDTLLATLNKTGKAVSYLGPK	21	O08997
SDTLLATLNKTGKAVSY	17	O08997
KHEFSVDMTCEGCAEAVSRVLNKLGGVEF	29	O08997
ALAHFDGILGLGFPTL	16	O09043
VGPRVGLARAQS	12	O09043
VGPRVGLARAQ	11	O09043
FVPLSKF	7	O09043
LGFQALDIPKPAGPLWILGDVF	22	O09043
GFQALDIPKPAGPLWILGDVF	21	O09043
AVGGVQPPLDAMVEQGLLEKPVFSF	25	O09043
GGVQPPLDAMVEQGLLEKPVFSF	23	O09043
LIRVPLQRIHLGHR	14	O09043
KLIRVPLQRIHLGHR	15	O09043
GNPSFVPLSKFMNTQY	16	O09043
IPKPAGPLWILGDVF	15	O09043
VGGVQPPLDAMVEQGLLEKPVFSF	24	O09043
AHFDGILGLGF	11	O09043
AVGGVQPPLDAMVEQGLLEKPVFSFY	26	O09043
KLIRVPLQRIHLGHRIL	17	O09043
KLIRVPLQRIHLGHRILNPLNGWEQL	26	O09043
KLIRVPLQRIHLGHRILNPLNGWEQ	25	O09043
LAHFDGILGLGFPTL	15	O09043
NPSFVPLSKFMNTQY	15	O09043
GPRVGLARAQSR	12	O09043
HFDGILGLGFPTL	13	O09043
GNPSFVPLSKF	11	O09043
KLIRVPLQRIHLGHRILNPL	20	O09043
VGPRVGLARAQSR	13	O09043
KLIRVPLQRIHLGHRILNPLN	21	O09043
KLIRVPLQRIHLGHRILNPLNG	22	O09043
AVGGVQPPLDAMVEQGLLEKPVFSFYLNRD	30	O09043
LAHFDGILGLGFPT	14	O09043
PRVGLARAQSR	11	O09043
KLIRVPLQRIHLGHRILNPLNGWE	24	O09043
ESSRAVIAPSGVEKKRQRE	19	O09111
PSKIQLPEDD	10	O09111
ESSRAVIAPSGVEK	14	O09111
ESSRAVIAPSGVEKKRQREPTMQWQED	27	O09111
AQLTLLRELIEAMLKA	16	O35114
RKLDDFVETGDIRTM	15	O35114
YVRKLDDFVETGDIRTMVF	19	O35114
RKLDDFVETGDIRTMVF	17	O35114
KLDDFVETGDIRTM	14	O35114
RKLDDFVETGDIR	13	O35114
RKLDDFVETGDIRT	14	O35114
KEEHESFVDINPLTG	15	O35114
KLDDFVETGDIRT	13	O35114
KLDDFVETGDIR	12	O35114
VRKLDDFVETGDIR	14	O35114
HTVHELL	7	O35114
VIHTVHELL	9	O35114
KPDVSPNFGLF	11	O35114
SDSMDTGAGSIREAGGAFGKREKAEEDRYFREKTKEQL	38	O35143
RDSLGDFIEHY	11	O35295
RIKSFKNKGRDVETMR	16	O35344
AENPGLENHRIK	12	O35344
HRIKSFKNKGRDVETMR	17	O35344
AENPGLENHRIKS	13	O35344
AENPGLENHRIKSFK	15	O35344
MAENPGLENHR	11	O35344
MAENPGLENHRIK	13	O35344
NKGRDVETMR	10	O35344
MEMDKRIYLELR	12	O35381
RNRTPSDVKELVLDNC	16	O35381
MEMDKRIYL	9	O35381
MEMDKRIYLELRNRTPSDVKEL	22	O35381
RNRTPSDVKELVLDN	15	O35381
MEMDKRIYLELRNRTP	16	O35381
MEMDKRIYLELRNRTPSDVKELVLDNC	27	O35381
MEMDKRIYLELRNR	14	O35381
ELRNRTPSDVKEL	13	O35381
RNRTPSDVKEL	11	O35381
MEMDKRIYLELRNRTPSDVKELV	23	O35381
MEMDKRIY	8	O35381
APVAGKKAKKGILERLNAGEVVIGDGGFVF	30	O35490
QQKEATTEQQLRELFEKQKFKS	22	O35490
APVAGKKAKKGILERLN	17	O35490
GAAELMQQKEATTEQQLRELFEKQKFKS	28	O35490
APVAGKKAKKGILERLNA	18	O35490
KGAAELMQQKEATTEQQLRELFEKQKFKS	29	O35490
APVAGKKAKKGILERLNAG	19	O35490
GAAELMQQKEATTEQQLRELFEKQK	25	O35490
GAAELMQQKEATTEQQLRELFEKQKFK	27	O35490
APVAGKKAKKGILER	15	O35490
QKEATTEQQLRELFEKQKFK	20	O35490
APVAGKKAKKGILERL	16	O35490
KGAAELMQQKEATTEQQLRELFEKQKFKSAQ	31	O35490
KGAAELMQQKEATTEQQLRELFEKQKFK	28	O35490
QKEATTEQQLRELFEKQKFKS	21	O35490
QKEATTEQQLRELFEKQKFKSAQ	23	O35490
AGKKAKKGILE	11	O35490
RELFEKQKFKS	11	O35490
ELFEKQKFKSAQ	12	O35490
FEKQKFKSAQ	10	O35490
APVAGKKAKKGILERLNAGE	20	O35490
PSMSRPDAWGVTKGAAELMQQKEATTEQQLRELFEKQKFKSAQ	43	O35490
PVAGKKAKKGILERLNAGEVVIGDGGFVF	29	O35490
MQQKEATTEQQLRELFEKQKFKS	23	O35490
KEATTEQQLRELFEKQKFKS	20	O35490
GKKAKKGILE	10	O35490
PSMSRPDAWGVTKGAAELMQQKEATTEQQLRELFEKQKFKS	41	O35490
APVAGKKAKKGILE	14	O35490
YASEDKLENRGN	12	O35490
YASEDKLENRG	11	O35490
VAGKKAKKGILE	12	O35490
AWGVTKGAAELMQQKEATTEQQLRELFEKQKFKS	34	O35490
ALEKRGYVKAGPWTPEAAVEHPEAVRQLHREFLRAGSNVMQTFTF	45	O35490
AVEHPEAVRQ	10	O35490
GGEQEEERFDGMLLAMAQQHEGGVQELVNTF	31	O35685
MDQHPEMDFSK	11	O35685
MDQHPEMDFSKAK	13	O35685
GGGKPPPPPPP	11	O35926
PSDVGDDMSNKVS	13	O35988
AQPGIRVPSEPKE	13	O35988
APSDVGDDMSNKVSM	15	O35988
IREGEVEVLK	10	O54724
HVKKIREGEVEVLK	14	O54724
REKLKTSRDKLR	12	O54724
TRLKTKENLEKTR	13	O54724
TKENLEKTRHTLEK	14	O54724
REGEVEVLKA	10	O54724
TKVRTRENLEK	11	O54724
TKENLEKTRHTLE	13	O54724
TRLKTKENLEKTRHTLEK	18	O54724
VPVERREKLK	10	O54724
TPDHVVYAR	9	O54724
QDEVKLPAKL	10	O54724
TKVRTRENLEKTR	13	O54724
MEKTKVRTRENLEKT	15	O54724
GTRLVPVERREK	12	O54724
EEVIEESRAERIK	13	O54724
NLEKTRHTLEK	11	O54724
VDDFKKAFS	9	O54724
TKENLEKTRHTLEKR	15	O54724
RHTLEKRMNK	10	O54724
KLGTRLVPVERREK	14	O54724
FDTVAVLRGEMFVFKGRWFWRVRHNRVLDNYPMPIGHFWRGLPGNISAAYERQDGHFVFFKGNRYWLFREANLEPGYPQPLSS	83	O54732
KSKGKFDGAKGPAKVA	16	O54879
TTSQKHRDF	9	O54962
KEGEEPTVYSDDEEPKDETARKNE	24	O55022
GKVFDVTKGRKFYGPEGPYGVFAGRDASRGLATF	34	O55022
DKEALKDEYDDLSDLTPAQQETL	23	O55022
GKVFDVTKGRK	11	O55022
YGPEGPYGVFAGRDASRGLATF	22	O55022
GKVFDVTKG	9	O55022
SDWDSQFTFKYHHVGKLL	18	O55022
KVFDVTKGRKFYGPEGPYGVFAGRDASRGLATF	33	O55022
GKVFDVTKGRKFYGPEGPYGVFAGRDASRGLAT	33	O55022
AKEGVVAAAEKTK	13	O55042
EGVVHGVTTVAEK	13	O55042
MDVFMKGLSKAKEGVVAA	18	O55042
MDVFMKGLSKAKEG	14	O55042
KEGVVAAAEKTK	12	O55042
VGSKTKEGVVHGVTTV	16	O55042
MDVFMKGLSKAKEGVVA	17	O55042
MDVFMKGLSKAKEGVVAAAEKTKQGVAEAAGKTKEGVLY	39	O55042
VKKDQMGKGEEGYPQEGILE	20	O55042
TKQGVAEAAGKTK	13	O55042
MDVFMKGLSKAKEGVVAAAEKTKQGVAE	28	O55042
GAGNIAAATGFVKKDQMGKGEEGYPQEGILE	31	O55042
AEKTKQGVAEAAGKTKEGV	19	O55042
ATGFVKKDQMGKGEE	15	O55042
VGSKTKEGVVHGVT	14	O55042
VVAAAEKTKQG	11	O55042
GVVHGVTTVAEK	12	O55042
MDVFMKGLSKAKEGVVAAAEKTKQGVAEAAG	31	O55042
MDVFMKGLSKAKEGVVAAAEKTKQGVA	27	O55042
AGKTKEGVLYVGSKTKEGVVH	21	O55042
MDVFMKGLSKAKEGVVAAAEKTKQ	24	O55042
MDVFMKGLSKAKEGVVAAAEKTKQGVAEAAGKTKEGVL	38	O55042
MDVFMKGLSKAKEGVVAAAEKTKQG	25	O55042
MDVFMKGLSKAKEGVVAAAEKTKQGVAEAAGKTK	34	O55042
MDVFMKGLSKAKEGVVAAAEKTK	23	O55042
MDVFMKGLSKAKEGVVAAAEKTKQGVAEAAGKTKEGVLYVG	41	O55042
MDVFMKGLSKAKEGVVAAAEKTKQGVAEAAGKTKEG	36	O55042
MDVFMKGLSKAKEGVVAAAEKTKQGVAEAAGKTKEGVLYVGSKTK	45	O55042
VGSKTKEGVVH	11	O55042
MDVFMKGLSKAK	12	O55042
EGVVAAAEKTK	11	O55042
MDVFMKGLSKAKEGVVAAAEKTKQGVAEA	29	O55042
MDVFMKGLSKAKEGVVAAAEKTKQGVAEAAGKT	33	O55042
AEKTKQGVAEAAGKTKEG	18	O55042
ATGFVKKDQMGKGEEGYPQEGILE	24	O55042
AAEKTKQGVAEAAGKTKEG	19	O55042
KDQMGKGEEGYPQEGILE	18	O55042
VGSKTKEGVVHG	12	O55042
VVAAAEKTKQ	10	O55042
PGSEAYEMPSEEGYQDYEPEA	21	O55042
MPVDPGSEAYEMPSEEGYQDYEPEA	25	O55042
AKEGVVAAAEKTKQGVAEAAGKTKEGVLYVGSKTKEGVVHGVT	43	O55042
MDVFMKGLSKAKEGVVAAAEKTKQGVAEAAGKTKEGVLYVGSKTKEGVVH	50	O55042
TKQGVAEAAGK	11	O55042
AEKTKEQVTNV	11	O55042
GSKTKEGVVHGVTTV	15	O55042
MDVFMKGLSKAKEGVVAAAEK	21	O55042
EGVVAAAEKTKQGVAEAAGK	20	O55042
GFVKKDQMGKGEEGYPQEGILE	22	O55042
AKEGVVAAAEK	11	O55042
GVAEAAGKTK	10	O55042
FLDDLGLKFK	10	O55111
FVARNYLEQPAILE	14	O55143-2
PVILMDETLKFVARNYLEQPAILE	24	O55143-2
ILMDETLKFVARNYLEQPAILE	22	O55143-2
ETLKFVARNYLEQPAILE	18	O55143-2
MTTHRLVMVRHGESLWNQENRF	22	O70250
VRKAMEAVAAQGKAK	15	O70250
MEAVAAQGKAK	11	O70250
LKPTKPMRFLGDEETVRKAMEAVAAQGKAK	30	O70250
MTTHRLVMVRHGESL	15	O70250
MTTHRLVMVRH	11	O70250
WYNHIKSYEKEKASLPGVKKS	21	O70251
WYNHIKSYEKEKASLPGVKK	20	O70251
RWYNHIKSYEKEKASLPGVK	20	O70251
HALRWYNHIKSYEKEKASLPGVKK	24	O70251
RWYNHIKSYEKEKASLPGVKK	21	O70251
YNHIKSYEKEKASLPGVKK	19	O70251
RWYNHIKSYEKEKASLPGVKKS	22	O70251
HALRWYNHIKSYEKEKASLPGVKKS	25	O70251
KSYEKEKASLPGVKK	15	O70251
ADESETAVKLPAPSLPL	17	O70310
ADESETAVKLPAPSLPLMMEGN	22	O70310
KKPITTGGVTYREQ	14	O70433
LTERDDILCPDCGKDI	16	O70433
MTERFDCHHC	10	O70433
KKPITTGGVT	10	O70433
KKTIMPGTRKM	11	O70433
KKQLSGQRF	9	O70433
KPITTGGVTYREQ	13	O70433
KKTIMPGTRKMEY	13	O70433
SGQRFTARDEF	11	O70433
NESLYGKKY	9	O70433
NESLYGKKYILKE	13	O70433
GSSLVDKPFAAKEEQL	16	O70433
KKTIMPGTRK	10	O70433
KKTIMPGTRKMEYKGSSWHET	21	O70433
KKPITTGGVTY	11	O70433
TNPISGLGGTKYISF	15	O70433
VDKPFAAKEE	10	O70433
TERFDCHHC	9	O70433
FCDLYAKKC	9	O70433
AGCTNPISGLGGTKY	15	O70433
TERDDILCPDCGKDI	15	O70433
RSKQDEVTVKASN	13	O70451
PPSDRDKESNI	11	O70451
TVMGLKSTHKH	11	O70579
ASVLSYESLVHAVAGAVGSVTAM	23	O70579
KIGAKKQKMSTLEK	14	O88271
DRVDHRQFEIER	12	O88271
SPATPLPAGSGIKR	14	O88271
SPATPLPAGSGIK	13	O88271
MFLVNSFLKGGGGGGGGGGLGGGLG	25	O88456
LVNSFLKGGGGGGGGGGLGGGLGN	24	O88456
MFLVNSFLKGGGGGGGGGG	19	O88456
MFLVNSFLKGGGGGGGGGGLGGGLGNVLGG	30	O88456
KGGGGGGGGGGLGGGLGNVLGGLISGAAGGGGGGGGGGMGLGGGGGGGGTAMRILGGVISAISEAAAQYNPEPPPPRSHY	80	O88456
MFLVNSFLKGG	11	O88456
MFLVNSFLKGGGGGGGGGGLGGGLGN	26	O88456
MFLVNSFLKGGGGGGGGGGLG	21	O88456
KGGGGGGGGGGLGGGLGNVLGGLIS	25	O88456
SSSLGKEKDSKEKDPKVPSA	20	O88520
GYGGGPGGNYGSGSYNDFGNYNQQPSNYGPMKSGNFGGSRNMGGPYGGGNYGPGGSGGSGGYGGRSRY	68	O88569-3
TFEFMDKLGENLKAKLAQAK	20	O88844
MSRKIQGGSVVEMQGDEMTRIIWELIKEKLILPYVEL	37	O88844
MSRKIQGGSVVEMQGDEMTRIIWELIKEKLIL	32	O88844
SRKIQGGSVVEMQGDEMTRIIWELIKEKLILPYVEL	36	O88844
SRKIQGGSVVEMQGDEMTRIIWELIKEKLILPYVE	35	O88844
NTFEFMDKLGENLKAKLAQAK	21	O88844
MSRKIQGGSVVEMQGDEMTRIIWELIKEKLILPYVE	36	O88844
LKAKLAQAKL	10	O88844
KNIPRLVTGWVKPIIIGRH	19	O88844
VQRSDYLNTFEFMDKLGENLKAKLAQAKL	29	O88844
TFEFMDKLGENLKAKLAQAKL	21	O88844
AGGPPHPQLKASPSQAQP	18	O88935-1
AAGGPPHPQLK	11	O88935-1
AAAGGPPHPQLKASPSQAQP	20	O88935-1
AAGGPPHPQLKASPSQAQP	19	O88935-1
AAAGGPPHPQLK	12	O88935-1
GPPHPQLKASPSQAQP	16	O88935-1
GPPHPQLK	8	O88935-1
GGPPHPQLK	9	O88935-1
GGPPHPQLKASPSQAQP	17	O88935-1
SSPGRHEAQEPFLQWL	16	O89023
HRILNGRPPLGFLNPRL	17	O89023
RPPLGFLNPR	10	O89023
RPPLGFLNPRLY	12	O89023
SPGRHEAQEPFLQWL	15	O89023
RPPLGFLNPRL	11	O89023
QQHGTGLFDVTHGC	14	O89023
SSPGRHEAQEPFLQW	15	O89023
QQHGTGLFDVTHG	13	O89023
GRHEAQEPFLQW	12	O89023
WVVSNMVPIPWVSGTSASTPVFGGILSL	28	O89023
RVNTEFMKAAARGLTLL	17	O89023
PPLGFLNPRLY	11	O89023
WVVSNMVPIPWVSGTSASTPVFGGILS	27	O89023
SPGRHEAQEPFLQW	14	O89023
QHGTGLFDVTH	11	O89023
SLHLGVTPSVL	11	O89023
GRHEAQEPFLQWL	13	O89023
SLHLGVTPSVLR	12	O89023
GRHEAQEPFLQ	11	O89023
TGLFDVTHGCH	11	O89023
NSDLTEFMR	9	O89023
SGTSASTPVFGGIL	14	O89023
QQHGTGLFDVTH	12	O89023
NEHRILNGRPPLGFLNPRL	19	O89023
GFLNPRL	7	O89023
RVNTEFMKAAARGLT	15	O89023
GRHEAQEPFL	10	O89023
[truncated: 11,746 more rows]
